# Supplementary material for: Aminophosphonate mineralisation is a major step in the global oceanic phosphorus redox cycle
Source: Research Square preprint supplement (doi:10.21203/rs.3.rs-114998/v1), 2020-12-18
Supplement: Supplementary file 2 [file 23700b7bcb800d37d31b0717.xlsx]

## Sheet: Stappia N source
LFQ intensity 2AEP_1	LFQ intensity 2AEP_2	LFQ intensity 2AEP_3	LFQ intensity NH3_1	LFQ intensity NH3_2	LFQ intensity NH3_3	C: Only identified by site	C: Reverse	C: Potential contaminant	C: Student's T-test Significant LFQ intensity 2AEP_LFQ intensity NH3	C: Student's T-test significant	N: Peptides	N: Razor + unique peptides	N: Unique peptides	N: Sequence coverage [%]	N: Unique + razor sequence coverage [%]	N: Unique sequence coverage [%]	N: Mol. weight [kDa]	N: Q-value	N: Score	N: Intensity	N: MS/MS count	N: -Log Student's T-test p-value LFQ intensity 2AEP_LFQ intensity NH3	N: Student's T-test q-value LFQ intensity 2AEP_LFQ intensity NH3	N: Student's T-test Difference LFQ intensity 2AEP_LFQ intensity NH3	N: Student's T-test Test statistic LFQ intensity 2AEP_LFQ intensity NH3	T: Protein IDs	T: Majority protein IDs	T: id
26.5338	25.6664	26.35	25.674	25.8181	26.3526						3	3	3	77.8	77.8	77.8	8.3557	0	32.457	295410000	34	0.282806	0.669295	0.235161	0.70191	WP_013653834.1	WP_013653834.1	62
22.6187	22.7086	22.9381	22.6104	22.3533	22.6451						6	6	6	18.7	18.7	18.7	41.501	0	29.433	15067000	18	0.760841	0.343813	0.218875	1.65413	WP_029056770.1	WP_029056770.1	63
21.8888	20.9409	22.9521	23.2363	22.8605	22.6488						4	4	4	16.4	16.4	16.4	35.16	0	9.0917	16530000	16	0.748933	0.350265	-0.98792	-1.63081	WP_029056772.1	WP_029056772.1	64
23.7499	23.0879	24.5203	24.1507	24.0637	24.5369						9	9	9	63.4	63.4	63.4	18.893	0	25.22	74479000	32	0.456557	0.528512	-0.464369	-1.05854	WP_029056776.1	WP_029056776.1	66
24.9287	25.1282	24.8778	25.4286	25.4364	25.8055						13	13	13	60.5	60.5	60.5	31.094	0	85.957	191500000	59	1.77946	0.0811241	-0.57862	-3.96438	WP_029056778.1	WP_029056778.1	67
22.2609	22.099	23.1286	22.2892	22.0665	22.3109						4	4	4	19.3	19.3	19.3	40.451	0	11.949	16218000	18	0.345	0.610852	0.273991	0.832676	WP_029056780.1	WP_029056780.1	69
27.0217	27.3144	27.4472	26.1632	25.9145	26.2528				+	LFQ intensity 2AEP_LFQ intensity NH3	19	19	19	57.8	57.8	57.8	27.634	0	125.23	342520000	133	2.68958	0.0209622	1.15089	7.13202	WP_029056783.1	WP_029056783.1	70
27.5165	27.548	27.0431	26.6595	26.3444	26.0972						25	25	25	28.7	28.7	28.7	107.06	0	209.61	483020000	126	1.91427	0.0674252	1.00221	4.34735	WP_029056790.1	WP_029056790.1	72
24.8402	24.2762	25.142	24.4654	23.5637	24.0674						5	5	5	23.1	23.1	23.1	21.405	0	41.48	84880000	27	0.92524	0.270385	0.720624	1.98013	WP_029056791.1	WP_029056791.1	73
25.8965	25.7205	25.7676	26.1942	26.3886	26.3849				+	LFQ intensity 2AEP_LFQ intensity NH3	10	10	10	46.4	46.4	46.4	21.813	0	31.137	341190000	84	2.50379	0.0275959	-0.527713	-6.35892	WP_029056805.1	WP_029056805.1	77
25.7045	25.916	25.2772	25.7458	25.736	25.7208						19	19	19	49.1	49.1	49.1	59.858	0	78.768	231590000	80	0.209393	0.745174	-0.101655	-0.540635	WP_029056806.1	WP_029056806.1	78
21.8196	22.1859	24.3164	24.3169	24.079	24.2296						6	6	6	34.9	34.9	34.9	31.175	0	13.545	69636000	24	0.852858	0.295454	-1.43453	-1.83551	WP_029056813.1	WP_029056813.1	80
24.2231	23.9848	23.9222	24.2061	24.6213	24.2819						4	4	4	20.8	20.8	20.8	28.623	0	13.296	88488000	24	0.973037	0.253648	-0.326423	-2.07682	WP_029056821.1	WP_029056821.1	84
22.1511	23.8337	24.55	24.1095	24.4849	24.6863						7	7	7	26.7	26.7	26.7	26.858	0	22.053	86075000	24	0.554957	0.464261	-0.915282	-1.25244	WP_029056823.1	WP_029056823.1	85
22.9006	22.2261	22.9368	22.9688	22.7311	22.8395						7	7	7	12.9	12.9	12.9	82.328	0	32.36	23129000	18	0.262371	0.689663	-0.158606	-0.657883	WP_029056825.1	WP_029056825.1	86
26.0261	25.6953	26.5939	26.2766	26.3201	26.3961						12	12	12	49.7	49.7	49.7	22.857	0	52.953	320200000	68	0.354915	0.601981	-0.225841	-0.85314	WP_029056827.1	WP_029056827.1	88
25.3881	25.5213	24.2973	26.546	26.5012	26.5835						12	12	12	41.2	41.2	41.2	37.396	0	97.778	335180000	69	1.71751	0.0885363	-1.47463	-3.79631	WP_029056833.1	WP_029056833.1	91
23.9814	23.3882	22.4107	24.1938	23.9021	24.3316						12	12	12	42	42	42	41.32	0	33.516	82870000	44	0.863793	0.292515	-0.882383	-1.85723	WP_029056834.1	WP_029056834.1	92
26.3476	26.1447	26.5725	26.6388	26.6167	26.7197						21	21	21	57.1	57.1	57.1	38.069	0	137.5	422310000	102	1.11969	0.204997	-0.303453	-2.38095	WP_029056836.1	WP_029056836.1	94
21.4287	22.6793	22.6705	22.5021	22.474	20.911						4	4	4	28.9	28.9	28.9	30.015	0	37.275	27736000	9	0.167263	0.798152	0.297149	0.44347	WP_029056838.1	WP_029056838.1	95
22.1552	21.8129	23.0852	26.2079	25.9543	26.1673				+	LFQ intensity 2AEP_LFQ intensity NH3	12	12	12	83.5	83.5	83.5	19.546	0	95.888	206720000	47	3.19614	0.0111717	-3.75873	-9.68291	WP_029056839.1	WP_029056839.1	96
22.1523	21.44	22.5163	24.6587	24.4892	24.2959				+	LFQ intensity 2AEP_LFQ intensity NH3	14	14	14	31.2	31.2	31.2	47.965	0	29.515	65837000	35	2.73719	0.0200443	-2.44511	-7.34288	WP_029056840.1	WP_029056840.1	97
28.2894	28.2004	27.8826	28.5292	28.3761	28.4295						26	26	26	58	58	58	46.775	0	258.87	1438900000	242	1.14828	0.194691	-0.320824	-2.44172	WP_029056842.1	WP_029056842.1	98
23.4757	22.0188	23.7223	23.4197	23.6278	23.6546						6	6	6	42.4	42.4	42.4	18.016	0	39.272	46378000	23	0.388823	0.577289	-0.495091	-0.922476	WP_029056843.1	WP_029056843.1	99
26.335	26.3998	25.228	25.7347	25.6892	25.3007						7	7	7	14.6	14.6	14.6	72.621	0	38.613	238300000	45	0.437478	0.540978	0.412701	1.02049	WP_029056849.1	WP_029056849.1	103
24.2411	24.1675	24.4048	24.8434	24.4557	24.6081						5	5	5	45.5	45.5	45.5	15.93	0	30.573	95940000	30	1.28734	0.163893	-0.364604	-2.74571	WP_029056850.1	WP_029056850.1	104
25.7657	25.4661	25.9985	25.783	25.598	25.7069						10	10	10	41.4	41.4	41.4	37.716	0	84.017	255060000	55	0.104775	0.873978	0.0474561	0.290823	WP_029056853.1	WP_029056853.1	105
23.2251	23.0896	23.5733	23.4427	23.4082	23.3083						5	5	5	28	28	28	34.707	0	6.8739	43389000	22	0.237766	0.714542	-0.0903721	-0.60403	WP_029056854.1	WP_029056854.1	106
25.2278	25.0297	23.829	25.3572	25.0291	25.4728						5	5	5	41	41	41	11.427	0	10.89	166340000	19	0.576034	0.451692	-0.590887	-1.29363	WP_029056855.1	WP_029056855.1	107
22.4933	22.0719	22.7309	23.9937	23.6604	23.8501				+	LFQ intensity 2AEP_LFQ intensity NH3	9	9	9	20.4	20.4	20.4	44.443	0	15.478	45265000	28	2.54115	0.0259341	-1.40271	-6.50826	WP_029056862.1	WP_029056862.1	109
29.3598	29.53	29.0308	29.6126	29.3867	29.2116						20	20	20	69.5	69.5	69.5	45.735	0	309.03	2869400000	189	0.199396	0.756308	-0.0968056	-0.51793	WP_029056866.1	WP_029056866.1	111
24.8992	24.1522	24.2218	25.055	25.2895	24.9832						18	18	18	67.8	67.8	67.8	32.612	0	41.172	151140000	66	1.25763	0.168786	-0.6848	-2.67953	WP_029056868.1	WP_029056868.1	112
27.1704	26.9381	27.4239	27.2126	26.8573	27.1219						12	12	12	73.5	73.5	73.5	17.097	0	70.808	582400000	88	0.256105	0.695759	0.113504	0.644259	WP_029056873.1	WP_029056873.1	115
24.849	24.0182	22.2542	24.9165	24.9426	24.9785						15	15	15	21.6	21.6	21.6	67.929	0	34.299	126660000	50	0.742752	0.352805	-1.23871	-1.61871	WP_029056879.1	WP_029056879.1	116
25.3544	25.2088	25.3729	25.5345	25.4048	25.5646						15	15	15	44.9	44.9	44.9	44.342	0	58.573	201920000	59	1.24497	0.170972	-0.189273	-2.65157	WP_029056881.1	WP_029056881.1	117
26.7581	26.7123	26.4262	26.7136	26.4848	26.4015						16	16	16	44.1	44.1	44.1	46.209	0	96.052	421350000	85	0.285877	0.669295	0.0988973	0.708478	WP_029056882.1	WP_029056882.1	118
27.6284	27.4828	27.7764	27.8473	27.6939	27.7066						22	22	22	72.5	72.5	72.5	34.9	0	323.31	882730000	144	0.5412	0.473361	-0.120066	-1.2255	WP_029056883.1	WP_029056883.1	119
21.3999	22.3729	23.1324	22.5745	21.9678	21.3761						4	4	4	13.7	13.7	13.7	45.565	0	8.4805	13473000	12	0.209105	0.745174	0.32895	0.539983	WP_029056887.1	WP_029056887.1	121
23.7395	23.9257	23.0368	24.393	25.1612	24.5212						18	18	18	28.5	28.5	28.5	107.76	0	56.33	101000000	56	1.45039	0.130827	-1.12447	-3.12225	WP_029056889.1	WP_029056889.1	122
28.5289	28.2913	28.845	28.6239	28.5987	28.8803						13	13	13	47.7	47.7	47.7	24.892	0	126.47	1629000000	144	0.326111	0.62845	-0.145881	-0.79342	WP_029056891.1	WP_029056891.1	124
25.7325	25.6138	26.3173	25.9939	25.8884	25.8807						10	10	10	55.8	55.8	55.8	18.935	0	35.137	256010000	62	0.0516964	0.929339	-0.0331459	-0.150335	WP_029056897.1	WP_029056897.1	126
22.0127	23.6921	23.2084	24.0108	23.7877	23.7744						4	4	4	10.7	10.7	10.7	34.542	0	10.067	55140000	17	0.812484	0.317072	-0.886528	-1.75564	WP_029056900.1	WP_029056900.1	127
23.925	21.4301	23.7157	23.8068	23.6648	23.7038						6	6	6	36	36	36	31.035	0	13.353	58841000	21	0.366415	0.593277	-0.701545	-0.876765	WP_029056903.1	WP_029056903.1	128
25.0681	24.6923	24.7313	24.7557	24.8319	25.3265						7	7	7	64.7	64.7	64.7	16.91	0	48.44	136090000	49	0.260829	0.690734	-0.140753	-0.654535	WP_029056910.1	WP_029056910.1	130
23.013	21.9903	22.5389	22.726	22.2232	21.9612						5	5	5	15	15	15	42.367	0	9.7631	16641000	17	0.221394	0.731053	0.210611	0.567631	WP_029056913.1	WP_029056913.1	131
24.863	24.5955	23.8457	25.0921	25.0408	25.0601						9	9	9	30.3	30.3	30.3	43.374	0	25.695	134290000	36	0.967363	0.255893	-0.629566	-2.06528	WP_029056916.1	WP_029056916.1	132
28.5912	28.8968	28.407	21.6338	20.9631	21.8687				+	LFQ intensity 2AEP_LFQ intensity NH3	11	11	11	57.8	57.8	57.8	32.7	0	109.52	458640000	60	4.69618	0.00192137	7.14316	23.2944	WP_029056924.1	WP_029056924.1	135
23.2102	23.6325	23.1988	21.6613	21.2573	22.2244				+	LFQ intensity 2AEP_LFQ intensity NH3	3	3	3	6.5	6.5	6.5	61.527	0	5.0805	8770700	6	2.18287	0.0439392	1.63282	5.18948	WP_029056935.1	WP_029056935.1	138
28.3859	28.5483	28.0558	21.7323	22.8554	21.6261				+	LFQ intensity 2AEP_LFQ intensity NH3	18	18	18	34.3	34.3	34.3	43.171	0	89.791	461060000	93	3.93137	0.00436464	6.2587	14.9335	WP_029056937.1	WP_029056937.1	140
31.8776	31.8145	31.5004	20.8323	22.0543	22.0878				+	LFQ intensity 2AEP_LFQ intensity NH3	39	39	39	79.6	79.6	79.6	45.315	0	323.31	4347300000	300	4.70917	0.00192137	10.0727	23.4704	WP_029056938.1	WP_029056938.1	141
31.785	31.9908	31.641	21.5944	21.2599	22.2083				+	LFQ intensity 2AEP_LFQ intensity NH3	43	43	43	72.7	72.7	72.7	52.309	0	323.31	4475300000	308	5.3614	0.000822774	10.1181	34.2193	WP_029056939.1	WP_029056939.1	142
24.0574	22.6697	23.8724	21.8299	21.105	21.7079						8	8	7	14.7	14.7	13.5	64.7	0	12.744	16759000	24	1.8131	0.0777944	1.98556	4.05769	WP_029056941.1	WP_029056941.1	143
21.4972	22.3834	21.9533	23.6256	22.6272	23.1789						6	6	6	26	26	26	41.508	0	24.455	21360000	13	1.44463	0.131247	-1.19924	-3.10854	WP_029057002.1	WP_029057002.1	144
26.3124	26.1718	25.9329	26.1652	25.6868	26.0255						9	9	9	25.9	25.9	25.9	58.215	0	72.954	285350000	51	0.426517	0.548064	0.179842	0.998544	WP_029057005.1	WP_029057005.1	146
30.3827	30.1651	30.5154	30.2388	29.8812	30.1199						22	22	22	73	73	73	38.658	0	323.31	4971800000	364	0.871381	0.288551	0.274431	1.87233	WP_029057010.1	WP_029057010.1	149
26.8545	26.9587	26.881	27.3255	27.1855	27.0337						15	15	15	71.4	71.4	71.4	34.536	0	108.9	605100000	122	1.4638	0.128091	-0.283504	-3.15431	WP_029057019.1	WP_029057019.1	152
24.517	21.734	23.8994	25.5205	25.6784	25.9459						14	14	14	54.3	54.3	54.3	37.816	0	44.341	174110000	70	1.28196	0.164191	-2.33149	-2.73368	WP_029057027.1	WP_029057027.1	153
26.4898	26.3331	26.7183	26.8272	26.7451	27.0361						12	12	12	47.6	47.6	47.6	22.363	0	261.13	485330000	87	1.1823	0.184812	-0.355753	-2.51479	WP_029057029.1	WP_029057029.1	154
21.9831	23.2119	23.3208	23.5568	23.0894	23.3503						5	5	5	32.3	32.3	32.3	24.282	0	11.932	34467000	17	0.476183	0.517276	-0.493588	-1.0975	WP_029057032.1	WP_029057032.1	155
27.3282	27.3671	27.1585	27.4428	27.2973	27.3183						24	24	24	66.5	66.5	66.5	44.738	0	208.75	705200000	161	0.362443	0.596176	-0.0681973	-0.868617	WP_029057035.1	WP_029057035.1	157
21.9226	23.778	24.4305	24.2193	21.5943	23.8157						6	6	6	25.3	25.3	25.3	29.492	0	27.702	76960000	19	0.0518615	0.929339	0.167259	0.150792	WP_029057036.1	WP_029057036.1	158
22.6123	21.7945	23.9039	23.9215	23.7855	24.1637						7	7	7	30.4	30.4	30.4	32.146	0	20.143	63236000	23	0.886247	0.285124	-1.18664	-1.90197	WP_029057037.1	WP_029057037.1	159
23.2453	22.0883	23.2323	23.3321	23.4728	23.4427						6	6	6	23.2	23.2	23.2	37.672	0	16.103	42619000	18	0.657614	0.40252	-0.56056	-1.45262	WP_029057038.1	WP_029057038.1	160
23.4358	23.2957	23.5658	23.8425	23.3207	23.5614						6	6	6	22.4	22.4	22.4	43.671	0	24.528	50207000	22	0.348068	0.608022	-0.142422	-0.839018	WP_029057041.1	WP_029057041.1	161
21.7288	22.039	23.5022	23.9855	23.7566	22.11						4	4	4	25.1	25.1	25.1	22.069	0	11.044	40091000	11	0.461943	0.526496	-0.860711	-1.06925	WP_029057043.1	WP_029057043.1	162
23.4913	23.298	23.171	23.1744	23.4583	23.1726						9	9	9	16.6	16.6	16.6	75.837	0	19.137	45820000	25	0.14415	0.831049	0.0516402	0.388343	WP_029057044.1	WP_029057044.1	163
28.2615	28.1326	28.1993	28.3766	28.0387	28.3868						20	20	20	44.9	44.9	44.9	62.083	0	151.7	1358800000	169	0.226048	0.72606	-0.0695267	-0.578028	WP_029057047.1	WP_029057047.1	164
23.3403	23.0747	23.8514	21.9164	23.1241	23.8048						2	2	2	29.4	29.4	29.4	9.6109	0	8.8776	37634000	12	0.325892	0.62845	0.47367	0.792961	WP_029057053.1	WP_029057053.1	165
24.583	24.6211	25.0124	25.1736	24.9694	24.994						13	13	13	51.9	51.9	51.9	32.097	0	38.128	135640000	53	0.947254	0.263543	-0.306851	-2.02453	WP_029057054.1	WP_029057054.1	166
25.2538	25.3077	25.1292	25.0817	25.1647	25.2444						11	11	11	31.7	31.7	31.7	50.201	0	83.368	151510000	47	0.398895	0.56843	0.0666644	0.942899	WP_029057055.1	WP_029057055.1	167
25.7653	25.3028	25.6282	25.2477	24.9073	25.1144						12	12	12	33.8	33.8	33.8	49.972	0	58.636	158340000	60	1.31668	0.15675	0.475651	2.81176	WP_029057056.1	WP_029057056.1	168
27.5706	26.7758	26.631	24.4555	23.8676	23.5981				+	LFQ intensity 2AEP_LFQ intensity NH3	32	32	32	62.6	62.6	62.6	53.395	0	159.01	243210000	106	2.83861	0.0178152	3.01874	7.81057	WP_029057057.1	WP_029057057.1	169
22.6831	22.2521	22.6597	23.8563	24.0872	24.1068				+	LFQ intensity 2AEP_LFQ intensity NH3	9	9	9	37.3	37.3	37.3	35.958	0	26.151	50211000	25	3.11095	0.0127345	-1.48515	-9.20272	WP_029057064.1	WP_029057064.1	172
22.3074	21.8959	22.8762	23.3876	23.0396	23.3901						4	4	4	22.6	22.6	22.6	16.121	0	6.4979	27932000	13	1.38638	0.140877	-0.912632	-2.97161	WP_029057065.1	WP_029057065.1	173
28.2666	28.1709	28.097	29.1847	29.0003	28.9543				+	LFQ intensity 2AEP_LFQ intensity NH3	34	34	34	66.4	66.4	66.4	51.227	0	323.31	1963800000	240	3.26982	0.0106316	-0.868258	-10.1169	WP_029057068.1	WP_029057068.1	174
26.5815	27.179	25.7307	27.7429	27.7678	27.5848						27	27	27	67.5	67.5	67.5	47.566	0	215.54	818980000	140	1.32595	0.154335	-1.20145	-2.83278	WP_029057069.1	WP_029057069.1	175
27.9699	27.8578	27.8666	28.7722	28.6417	28.7624				+	LFQ intensity 2AEP_LFQ intensity NH3	17	17	17	51.5	51.5	51.5	49.608	0	136.09	1604900000	149	3.93466	0.00436464	-0.827316	-14.9622	WP_029057070.1	WP_029057070.1	176
26.9043	27.2092	26.4998	27.9295	27.8011	27.716						19	19	19	55.1	55.1	55.1	38.619	0	109.61	843010000	116	1.93227	0.0653349	-0.944474	-4.40037	WP_029057071.1	WP_029057071.1	177
22.8367	22.8455	23.6596	22.9199	24.1964	22.4837						12	12	12	13.4	13.4	13.4	126.43	0	33.714	41752000	39	0.0507946	0.9304	-0.0860157	-0.14784	WP_029057073.1	WP_029057073.1	178
25.2493	24.9491	25.1592	24.7346	24.7222	24.7947						18	18	18	32.4	32.4	32.4	65.632	0	98.225	124930000	66	1.7996	0.0787731	0.368685	4.02006	WP_029057077.1	WP_029057077.1	179
24.279	24.219	24.4912	26.1234	25.2311	25.4918						12	12	12	40.1	40.1	40.1	45.318	0	50.62	183460000	46	2.00973	0.058669	-1.28571	-4.63391	WP_029057079.1	WP_029057079.1	180
24.8405	21.5722	23.374	24.7856	24.5489	24.9631						3	3	3	25.5	25.5	25.5	15.885	0	22.686	103800000	18	0.722057	0.364302	-1.50362	-1.57826	WP_029057091.1	WP_029057091.1	183
29.3701	29.229	29.6402	30.5421	30.3424	30.5815				+	LFQ intensity 2AEP_LFQ intensity NH3	25	25	25	63.1	63.1	63.1	34.235	0	310.05	5144500000	280	2.79364	0.0193338	-1.07555	-7.60001	WP_029057093.1	WP_029057093.1	184
22.2174	23.0165	23.7828	22.2535	23.0456	23.1291						4	4	4	11.4	11.4	11.4	41.329	0	4.0586	25737000	10	0.136363	0.836814	0.196213	0.369438	WP_029057103.1	WP_029057103.1	186
25.5774	25.747	24.2267	24.7302	24.7424	24.4987						11	11	11	12.7	12.7	12.7	112.81	0	51.627	115470000	67	0.467467	0.524853	0.52658	1.08022	WP_029057106.1	WP_029057106.1	187
22.9845	22.4838	23.3769	21.8615	22.6954	22.7323						2	2	2	8.7	8.7	8.7	31.6	0	6.5047	17148000	10	0.604872	0.435943	0.51866	1.34988	WP_029057107.1	WP_029057107.1	188
25.7657	25.8427	24.9152	25.3621	25.5984	25.2442						13	13	13	34.1	34.1	34.1	59.682	0	55.504	191010000	78	0.123435	0.84905	0.106314	0.337652	WP_029057108.1	WP_029057108.1	189
22.0122	21.0358	22.8379	23.452	23.5397	23.8209						4	4	4	20.7	20.7	20.7	25.415	0	10.866	38671000	14	1.43411	0.132302	-1.64223	-3.08358	WP_029057110.1	WP_029057110.1	191
27.5483	27.6865	27.1037	27.5051	27.4033	27.4473						35	35	35	68.7	68.7	68.7	68	0	206.24	793800000	199	0.0106764	0.988985	-0.00577291	-0.0323851	WP_029057111.1	WP_029057111.1	192
25.2882	25.6238	23.9095	26.7013	25.5475	25.8933						11	11	11	43.3	43.3	43.3	35.16	0	31.489	285920000	52	0.818651	0.314338	-1.10686	-1.76781	WP_029057112.1	WP_029057112.1	193
21.3041	22.5083	21.4025	24.2768	24.2681	24.31				+	LFQ intensity 2AEP_LFQ intensity NH3	7	7	7	27.1	27.1	27.1	28.929	0	15.113	56208000	33	2.562	0.0251234	-2.54668	-6.59294	WP_029057113.1	WP_029057113.1	194
26.5868	26.4137	26.264	26.1792	26.0831	26.2479						14	14	14	39.5	39.5	39.5	52.562	0	69.233	311550000	97	1.1284	0.201906	0.251411	2.39939	WP_029057117.1	WP_029057117.1	198
29.1744	29.0328	28.7979	29.4147	29.1952	29.1802						32	32	32	66.3	66.3	66.3	48.167	0	192.1	2567500000	329	0.915904	0.274115	-0.26169	-1.96136	WP_029057118.1	WP_029057118.1	199
23.4453	23.4109	21.9812	23.0774	23.4237	23.4414						5	5	5	27.8	27.8	27.8	27.919	0	19.868	41358000	17	0.301406	0.652472	-0.368324	-0.741494	WP_029057120.1	WP_029057120.1	201
24.3322	24.3614	23.1757	22.9384	23.7353	22.805						6	6	6	39.4	39.4	39.4	17.102	0	17.94	41275000	23	0.752371	0.348115	0.796882	1.63754	WP_029057121.1	WP_029057121.1	202
23.9134	23.9183	23.167	23.3034	23.1837	23.0799						9	9	9	30.5	30.5	30.5	35.948	0	70.118	37562000	27	0.860535	0.294154	0.477215	1.85076	WP_029057122.1	WP_029057122.1	203
30.9244	30.8515	30.9143	30.1688	30.2525	30.1209				+	LFQ intensity 2AEP_LFQ intensity NH3	69	69	69	69.6	69.6	69.6	88.399	0	323.31	5773700000	690	4.05172	0.00396996	0.716035	16.0202	WP_029057123.1	WP_029057123.1	204
23.8535	24.0566	23.7105	24.4651	24.4134	24.3302						8	8	8	50.3	50.3	50.3	20.618	0	25.098	78254000	33	2.09772	0.0505756	-0.529407	-4.91025	WP_029057128.1	WP_029057128.1	207
24.3274	21.9879	24.1036	24.3717	21.9587	24.3166						5	5	5	26.8	26.8	26.8	25.219	0	27.71	66515000	19	0.0233114	0.96853	-0.0760263	-0.0697525	WP_029057129.1	WP_029057129.1	208
28.1302	28.2607	28.2588	28.2643	28.3381	28.3998						21	21	21	76.2	76.2	76.2	32.174	0	180.01	1285300000	154	0.942936	0.26452	-0.117521	-2.0158	WP_029057130.1	WP_029057130.1	209
29.0418	28.6873	28.9287	29.0099	28.8155	28.9387						24	24	24	71.4	71.4	71.4	29.703	0	323.31	2006900000	224	0.107367	0.870511	-0.0353794	-0.297398	WP_029057131.1	WP_029057131.1	210
27.3108	27.0721	27.0672	27.032	26.99	26.9207						20	20	20	47	47	47	49.022	0	107.2	537690000	128	0.910906	0.275935	0.16914	1.95132	WP_029057136.1	WP_029057136.1	212
26.3162	25.702	26.726	26.111	26.2558	26.6384						7	7	7	45.9	45.9	45.9	12.213	0	29.117	342040000	60	0.0921585	0.887966	-0.0869954	-0.258468	WP_029057143.1	WP_029057143.1	214
23.6412	21.3922	23.6191	23.7719	23.599	23.5804						5	5	5	23.1	23.1	23.1	33.274	0	12.403	48061000	13	0.439116	0.540171	-0.766289	-1.02377	WP_029057144.1	WP_029057144.1	215
26.3883	26.5159	26.1032	26.2071	26.4146	26.0755						29	29	29	32.2	32.2	32.2	105.99	0	91.252	347290000	122	0.262868	0.689653	0.103409	0.658961	WP_029057146.1	WP_029057146.1	216
24.3023	24.0921	24.4047	24.7447	24.8719	24.9189				+	LFQ intensity 2AEP_LFQ intensity NH3	7	7	7	34.5	34.5	34.5	22.944	0	20.508	111380000	32	2.26648	0.0398213	-0.578821	-5.47568	WP_029057149.1	WP_029057149.1	217
25.6839	25.6871	25.625	25.6249	25.5102	25.4015						15	15	15	39.3	39.3	39.3	59.876	0	59.938	211450000	80	1.06482	0.222399	0.153106	2.26571	WP_029057153.1	WP_029057153.1	219
24.0569	24.2384	22.9774	23.7377	23.8931	23.8311						4	4	4	9.3	9.3	9.3	22.106	0	15.208	61489000	21	0.0549007	0.927735	-0.063055	-0.159167	WP_029057159.1	WP_029057159.1	224
21.8663	22.8225	23.6908	22.8034	21.2391	22.802						2	2	2	13	13	13	18.679	0	4.2011	30764000	8	0.277455	0.674495	0.511708	0.690439	WP_029057160.1	WP_029057160.1	225
27.051	27.2038	26.8321	27.2757	27.2213	26.9486						25	25	25	47.8	47.8	47.8	73.895	0	135	648020000	157	0.333322	0.623703	-0.119572	-0.808447	WP_029057163.1	WP_029057163.1	227
25.6015	25.6133	24.9091	25.5236	25.4257	25.1872						10	10	10	33.9	33.9	33.9	47.362	0	26.119	187000000	60	0.00546117	0.992657	-0.00422096	-0.0166624	WP_029057164.1	WP_029057164.1	228
26.257	26.0204	25.9298	26.3695	26.2557	26.344						10	10	10	23.8	23.8	23.8	41.563	0	44.648	324450000	75	1.15467	0.193336	-0.254018	-2.4554	WP_029057165.1	WP_029057165.1	229
26.641	26.7256	26.6027	26.8171	26.6946	26.8048						19	19	19	59.4	59.4	59.4	44.445	0	133.49	481900000	123	1.02024	0.240338	-0.115726	-2.17339	WP_029057166.1	WP_029057166.1	230
23.9348	23.8085	24.243	24.2618	24.2637	24.2129						5	5	5	20.6	20.6	20.6	22.985	0	16.121	77051000	25	0.898757	0.280619	-0.250702	-1.92698	WP_029057168.1	WP_029057168.1	232
23.8396	23.4758	24.4354	24.6239	24.1802	24.5333						5	5	5	25.5	25.5	25.5	21.183	0	12.675	106560000	30	0.785214	0.330916	-0.528866	-1.70196	WP_029057169.1	WP_029057169.1	233
22.0158	21.7132	22.6284	22.0056	22.0765	22.5003						5	5	5	11.9	11.9	11.9	27.515	0	8.522	13708000	14	0.0856707	0.893537	-0.0749849	-0.241595	WP_029057172.1	WP_029057172.1	235
26.2529	26.4284	26.1323	26.485	26.4105	26.5687						23	23	23	57.7	57.7	57.7	46.788	0	121.35	370550000	118	1.04666	0.2303	-0.216888	-2.22797	WP_029057173.1	WP_029057173.1	236
25.7873	25.6607	25.6346	25.6075	25.5159	25.4776						19	19	19	44.9	44.9	44.9	64.905	0	95.339	219180000	107	1.23823	0.173184	0.160529	2.6367	WP_029057180.1	WP_029057180.1	240
22.4753	21.9176	23.2643	22.4984	22.5625	22.1824						7	7	7	12.1	12.1	12.1	76.424	0	8.1484	20780000	18	0.123635	0.84905	0.137947	0.338147	WP_029057185.1	WP_029057185.1	243
26.9255	26.7945	26.4282	27.2258	27.5495	27.398						30	30	30	65.6	65.6	65.6	55.939	0	152.34	693620000	167	1.73411	0.0871509	-0.675032	-3.8409	WP_029057189.1	WP_029057189.1	245
26.1566	25.4919	25.8229	26.0216	25.7767	26.0208						10	10	10	25.7	25.7	25.7	45.619	0	136.46	266090000	68	0.216195	0.735486	-0.115904	-0.555971	WP_029057193.1	WP_029057193.1	248
26.3238	26.2173	26.3704	26.7239	26.6338	26.569				+	LFQ intensity 2AEP_LFQ intensity NH3	16	16	16	46.5	46.5	46.5	47.26	0	150.93	412130000	112	2.21704	0.0427821	-0.338394	-5.30497	WP_029057194.1	WP_029057194.1	249
24.0482	23.7374	24.4266	25.3604	24.9828	25.3846						11	11	11	49.4	49.4	49.4	27.468	0	45.23	142940000	54	2.10205	0.0505078	-1.17188	-4.92413	WP_029057195.1	WP_029057195.1	250
25.9035	25.9387	25.6254	26.6031	26.6573	26.3193						16	16	16	31.8	31.8	31.8	54.702	0	57.162	351320000	74	2.08853	0.0509402	-0.704048	-4.8808	WP_029057196.1	WP_029057196.1	251
22.8572	22.3104	23.6883	22.8795	23.042	22.7617						3	3	3	22	22	22	24.063	0	9.4284	27246000	12	0.0482495	0.934993	0.0575441	0.140778	WP_029057198.1	WP_029057198.1	253
24.8168	25.3612	21.9867	24.6055	25.1863	24.6235						13	13	13	17.1	17.1	17.1	135.82	0	57.75	118360000	42	0.284542	0.669295	-0.750225	-0.705623	WP_029057200.1	WP_029057200.1	255
27.0624	27.166	26.9487	27.1263	26.9075	27.3205						7	7	7	32.3	32.3	32.3	41.194	0	53.521	556620000	60	0.165096	0.800466	-0.0590903	-0.438359	WP_029057212.1	WP_029057212.1	258
25.7388	25.6118	25.6369	25.2571	25.3536	25.3205				+	LFQ intensity 2AEP_LFQ intensity NH3	12	12	12	26.2	26.2	26.2	73.648	0	81.025	199660000	74	2.73361	0.0200443	0.352107	7.32684	WP_029057213.1	WP_029057213.1	259
27.6278	27.6617	27.6041	27.3335	27.129	27.1247				+	LFQ intensity 2AEP_LFQ intensity NH3	29	29	29	57.6	57.6	57.6	67.118	0	111.58	686860000	157	2.44871	0.0299111	0.435479	6.144	WP_029057214.1	WP_029057214.1	260
26.1755	25.9811	23.8084	26.0373	25.7786	25.8703						15	15	15	40.5	40.5	40.5	45.82	0	57.906	257570000	75	0.306553	0.647052	-0.573668	-0.75237	WP_029057215.1	WP_029057215.1	261
27.925	27.902	27.8196	28.2538	28.4385	28.2036				+	LFQ intensity 2AEP_LFQ intensity NH3	39	39	39	50.7	50.7	50.7	82.519	0	323.31	1274000000	275	2.22217	0.0427821	-0.416441	-5.32248	WP_029057217.1	WP_029057217.1	262
24.103	24.2837	24.0179	23.8404	23.7495	23.7437						8	8	8	30.3	30.3	30.3	36.479	0	24.374	60365000	38	1.87428	0.0717964	0.357033	4.23118	WP_029057221.1	WP_029057221.1	263
26.3314	25.8931	26.6771	26.3593	26.3012	26.7478						9	9	9	67.1	67.1	67.1	15.313	0	47.537	356580000	60	0.251138	0.701401	-0.168917	-0.633417	WP_029057224.1	WP_029057224.1	265
24.4557	24.0822	24.5165	23.707	23.5337	23.6058				+	LFQ intensity 2AEP_LFQ intensity NH3	7	7	7	25.2	25.2	25.2	39.425	0	36.043	63021000	35	2.15098	0.0463004	0.73593	5.08348	WP_029057226.1	WP_029057226.1	266
25.2262	25.4097	25.6043	25.6559	25.5086	25.3587						9	9	9	35.4	35.4	35.4	37.603	0	46.598	216500000	54	0.272401	0.680834	-0.0943667	-0.679567	WP_029057227.1	WP_029057227.1	267
28.988	28.9153	28.713	29.8151	29.4492	29.5395				+	LFQ intensity 2AEP_LFQ intensity NH3	19	19	19	49.4	49.4	49.4	47.549	0	208.88	3010100000	231	2.21775	0.0427821	-0.729169	-5.30739	WP_029057230.1	WP_029057230.1	268
23.1143	23.4357	23.7318	24.0388	23.8434	23.7782						7	7	7	19.1	19.1	19.1	53.862	0	24.343	61572000	22	1.1096	0.205476	-0.459522	-2.3596	WP_029057231.1	WP_029057231.1	269
24.1859	23.8122	24.2089	24.5799	24.1757	24.2845						10	10	10	29.9	29.9	29.9	47.847	0	31.673	80824000	39	0.720096	0.364487	-0.277728	-1.57443	WP_029057232.1	WP_029057232.1	270
23.2213	23.9563	23.6009	23.6867	23.6695	23.7551						4	4	4	24.1	24.1	24.1	22.912	0	27.146	48847000	21	0.199743	0.756308	-0.110916	-0.518722	WP_029057233.1	WP_029057233.1	271
26.0294	25.84	25.3649	26.6744	26.4984	26.4405						17	17	17	42.2	42.2	42.2	53.664	0	82.639	372770000	91	1.7114	0.0890545	-0.793018	-3.78	WP_029057234.1	WP_029057234.1	272
23.3133	22.3446	22.2454	23.6194	23.8148	23.6965						7	7	7	40.2	40.2	40.2	26.411	0	21.858	49723000	22	1.44745	0.130827	-1.07581	-3.11524	WP_029057235.1	WP_029057235.1	273
26.1523	26.0354	26.1863	25.9261	25.9187	25.8069						18	18	18	45.3	45.3	45.3	47.509	0	125.01	300400000	118	1.80189	0.0787731	0.240749	4.02643	WP_029057238.1	WP_029057238.1	276
28.6361	28.562	28.4783	28.6376	28.5044	28.4577						35	35	35	81.2	81.2	81.2	53.159	0	323.31	1648400000	267	0.133463	0.840256	0.0255706	0.362351	WP_029057240.1	WP_029057240.1	277
21.9688	23.2779	23.3886	24.5814	24.0538	21.2196						10	10	10	33.9	33.9	33.9	37.037	0	14.268	54227000	22	0.131229	0.840256	-0.406514	-0.356876	WP_029057243.1	WP_029057243.1	278
25.5762	25.5018	21.9453	25.6474	25.052	25.5045						5	5	5	17.8	17.8	17.8	40.172	0	60.667	168980000	27	0.365628	0.593277	-1.06022	-0.875152	WP_029057245.1	WP_029057245.1	280
27.2132	26.9755	26.8219	27.1183	26.858	26.8767						13	13	13	30.7	30.7	30.7	51.543	0	36.368	530540000	57	0.137229	0.836814	0.0525214	0.371549	WP_029057246.1	WP_029057246.1	281
21.6291	22.3602	22.6847	22.2323	21.9214	22.3251						3	3	3	10	10	10	34.565	0	13.693	14369000	14	0.0677357	0.916232	0.0650463	0.194058	WP_029057278.1	WP_029057278.1	283
25.1898	24.7263	25.028	24.2268	22.2357	23.7836						9	9	9	27.2	27.2	27.2	42.22	0	30.669	75097000	44	1.19001	0.18367	1.56602	2.53147	WP_029057295.1	WP_029057295.1	287
24.7154	24.597	24.8245	24.1878	21.6521	23.6581						5	5	5	18.1	18.1	18.1	58.105	0	15.598	78844000	19	0.9327	0.266954	1.54633	1.99515	WP_029057304.1	WP_029057304.1	290
22.6446	21.5241	22.669	22.2399	22.3483	22.6023						2	2	2	8.7	8.7	8.7	39.856	0	4.8697	15199000	9	0.10825	0.870288	-0.117638	-0.299633	WP_029057305.1	WP_029057305.1	291
24.9434	23.0397	23.6058	25.8173	25.9137	25.8375						6	6	6	34.8	34.8	34.8	34.312	0	37.344	196150000	39	1.6144	0.10137	-1.99322	-3.52683	WP_029057319.1	WP_029057319.1	292
21.8889	21.6783	23.0253	23.6587	23.2822	23.2755						7	7	7	27.2	27.2	27.2	38.605	0	78.54	38793000	20	1.29539	0.161801	-1.20801	-2.76377	WP_029057321.1	WP_029057321.1	293
26.0361	25.8157	25.8553	25.8674	25.8617	25.8911						14	14	14	40.6	40.6	40.6	49.412	0	73.929	267380000	79	0.158979	0.809277	0.0290063	0.423873	WP_029057325.1	WP_029057325.1	295
22.2281	22.5771	24.9286	24.5995	24.6682	24.7957						7	7	7	36.5	36.5	36.5	23.905	0	91.618	96784000	29	0.783171	0.331878	-1.44319	-1.69794	WP_029057327.1	WP_029057327.1	296
26.7291	26.6806	26.5975	23.9841	24.342	25.0255				+	LFQ intensity 2AEP_LFQ intensity NH3	11	11	10	40.8	40.8	36.6	29.77	0	35.773	172100000	75	2.70633	0.0207711	2.21854	7.20561	WP_029057331.1;WP_029059614.1	WP_029057331.1	297
24.1802	24.3987	22.2427	22.4304	22.272	22.0217						7	7	7	15.2	15.2	15.2	46.656	0	16.173	23274000	19	0.917268	0.273808	1.36581	1.9641	WP_029057332.1	WP_029057332.1	298
32.7681	32.7778	32.8108	31.7845	31.3332	31.6765				+	LFQ intensity 2AEP_LFQ intensity NH3	35	35	35	81.7	81.7	81.7	36.4	0	323.31	16427000000	725	3.01508	0.0140369	1.18752	8.6887	WP_029057334.1	WP_029057334.1	299
26.2346	26.054	26.0145	26.6241	26.1276	26.267						10	10	10	37	37	37	41.436	0	63.89	377950000	65	0.664901	0.398239	-0.238541	-1.46681	WP_029057335.1	WP_029057335.1	300
22.4986	22.0832	24.3713	25.0112	24.4253	24.9451						5	5	5	57.4	57.4	57.4	11.828	0	28.164	85907000	20	1.16919	0.189319	-1.80952	-2.48654	WP_029057339.1	WP_029057339.1	302
26.5865	26.5324	26.5681	25.1463	25.6333	25.575				+	LFQ intensity 2AEP_LFQ intensity NH3	11	11	11	40.2	40.2	40.2	37.019	0	62.333	243660000	70	2.70431	0.0207711	1.11083	7.19669	WP_029057347.1	WP_029057347.1	304
26.6291	26.4104	26.6875	26.5171	26.5835	26.4251						14	14	14	74.9	74.9	74.9	25.695	0	73.513	382320000	84	0.281233	0.670954	0.0670821	0.698542	WP_029057353.1	WP_029057353.1	306
28.1707	27.9524	27.9551	28.4058	28.315	28.776						10	10	10	87.9	87.9	87.9	9.3575	0	93.668	1384500000	93	1.39177	0.140386	-0.472888	-2.98415	WP_029057356.1	WP_029057356.1	308
26.7628	26.9141	26.569	27.0518	27.3018	27.1501						34	34	34	44.5	44.5	44.5	89.362	0	172.95	609500000	190	1.5614	0.109228	-0.419251	-3.39301	WP_029057357.1	WP_029057357.1	309
28.062	27.9572	27.8125	28.6127	28.252	28.3852						31	31	31	72	72	72	46.245	0	323.31	1398600000	233	1.68142	0.0938804	-0.472748	-3.70057	WP_029057358.1	WP_029057358.1	310
25.0302	24.6565	25.6005	25.0027	25.5212	25.7759						11	11	11	45.5	45.5	45.5	23.173	0	59.505	176810000	57	0.400836	0.56734	-0.337535	-0.946825	WP_029057359.1	WP_029057359.1	311
28.385	28.5599	28.0866	28.2494	28.0809	28.3063						33	33	33	68.1	68.1	68.1	50.485	0	208.45	1284400000	299	0.356155	0.601981	0.131646	0.855693	WP_029057360.1	WP_029057360.1	312
25.7403	25.365	26.1491	23.3081	23.3213	23.4968				+	LFQ intensity 2AEP_LFQ intensity NH3	6	6	6	42	42	42	12.272	0	20.995	83407000	32	3.27285	0.0106316	2.37608	10.1352	WP_029057362.1	WP_029057362.1	313
32.2098	32.0936	31.6535	28.8953	28.6646	28.8153				+	LFQ intensity 2AEP_LFQ intensity NH3	32	32	32	84.9	84.9	84.9	52.171	0	323.31	6451300000	358	4.20419	0.00332684	3.1939	17.5081	WP_029057363.1	WP_029057363.1	314
24.2502	24.4365	24.2682	24.525	24.2857	24.5898						4	4	4	24.1	24.1	24.1	29.16	0	19.901	87594000	32	0.606003	0.435493	-0.148552	-1.35208	WP_029057364.1	WP_029057364.1	315
28.6496	28.7488	28.2493	28.3837	28.4644	28.3082						31	31	31	69.6	69.6	69.6	52.097	0	234.69	1515600000	217	0.441756	0.538327	0.163814	1.02904	WP_029057369.1	WP_029057369.1	316
26.7956	26.7082	26.8872	26.415	26.3189	26.1852				+	LFQ intensity 2AEP_LFQ intensity NH3	21	21	21	38.8	38.8	38.8	88.832	0	122.2	374010000	107	2.36185	0.0349604	0.490629	5.81753	WP_029057372.1	WP_029057372.1	317
22.1056	22.1097	23.6539	23.9846	23.5431	23.6253						5	5	5	23.6	23.6	23.6	35.423	0	17.872	49547000	18	0.961735	0.257483	-1.09461	-2.05386	WP_029057374.1	WP_029057374.1	318
22.6363	22.4043	21.7419	22.9708	23.0287	22.9959						6	6	6	26.1	26.1	26.1	26.213	0	30.19	32040000	21	1.288	0.163893	-0.737602	-2.74719	WP_029057376.1	WP_029057376.1	319
22.2636	21.3496	22.1407	23.7308	23.7827	23.7294				+	LFQ intensity 2AEP_LFQ intensity NH3	3	3	3	20.6	20.6	20.6	31.331	0	17.414	48522000	17	2.50821	0.0275337	-1.82966	-6.37641	WP_029057377.1	WP_029057377.1	320
27.0921	27.1665	26.6592	26.6034	26.5982	26.5668						14	14	14	65.8	65.8	65.8	44.187	0	66.879	457080000	87	1.13629	0.199235	0.38317	2.41617	WP_029057378.1	WP_029057378.1	321
24.5714	22.262	23.0499	24.7188	24.2895	24.8631						2	2	2	11.5	11.5	11.5	8.3833	0	6.7865	96235000	10	0.885674	0.285124	-1.32936	-1.90083	WP_029057379.1	WP_029057379.1	322
25.2012	25.2192	25.7642	25.1585	25.3704	25.5306						4	4	4	31	31	31	25.305	0	34.359	164120000	37	0.0680447	0.916232	0.0416819	0.194889	WP_029057380.1	WP_029057380.1	323
26.0008	26.1968	26.1331	26.3255	26.1903	26.4328						9	9	9	47.6	47.6	47.6	32.559	0	76.137	323340000	49	1.06585	0.222386	-0.205988	-2.26786	WP_029057381.1	WP_029057381.1	324
26.7131	26.8244	27.2232	26.6649	26.4602	26.672						13	13	13	68.6	68.6	68.6	16.251	0	112.14	449600000	143	0.881601	0.285124	0.321192	1.8927	WP_029057382.1	WP_029057382.1	325
27.1723	26.8496	27.0102	26.3344	26.5238	26.7822						9	9	9	64.6	64.6	64.6	9.5403	0	22.05	451110000	42	1.35706	0.148436	0.463888	2.90385	WP_029057383.1	WP_029057383.1	326
26.4541	26.1671	26.6179	26.4426	26.5355	26.7945						11	11	11	50.2	50.2	50.2	22.462	0	74.833	371830000	65	0.454433	0.528512	-0.177832	-1.05432	WP_029057384.1	WP_029057384.1	327
26.9593	26.8417	26.6948	26.8553	26.6894	26.6256						18	18	18	47	47	47	46.083	0	110.8	459190000	108	0.455768	0.528512	0.108495	1.05697	WP_029057385.1	WP_029057385.1	328
25.5299	25.4967	25.5176	26.1178	25.7759	25.8765						13	13	13	35.6	35.6	35.6	55.335	0	56.476	257070000	71	1.79612	0.0787731	-0.408663	-4.01041	WP_029057389.1	WP_029057389.1	330
22.5354	21.5364	22.2231	21.4295	23.8085	23.7376						5	5	5	11	11	11	61.022	0	27.86	41101000	16	0.462182	0.526496	-0.893545	-1.06972	WP_029057397.1	WP_029057397.1	332
28.2479	28.1231	27.7365	28.4606	28.3232	28.2885						26	26	26	62.8	62.8	62.8	51.391	0	254.2	1347100000	183	0.923935	0.270385	-0.321665	-1.9775	WP_029057398.1	WP_029057398.1	333
22.3486	23.2162	21.9234	23.5024	23.2302	23.5412						6	6	6	46.2	46.2	46.2	16.42	0	17.641	36727000	20	1.11158	0.205472	-0.928521	-2.36378	WP_029057400.1	WP_029057400.1	335
30.5897	30.6959	30.4597	31.7134	31.6154	31.7387				+	LFQ intensity 2AEP_LFQ intensity NH3	37	37	37	84.4	84.4	84.4	35.617	0	323.31	11794000000	433	3.84577	0.00471357	-1.10739	-14.2045	WP_029057403.1	WP_029057403.1	336
22.5393	22.8078	21.526	23.0944	23.4774	22.7397						10	10	10	17.2	17.2	17.2	89.974	0	37.725	35126000	26	0.8491	0.297461	-0.81281	-1.82805	WP_029057407.1	WP_029057407.1	338
27.0249	27.3046	26.6722	26.5278	27.3345	27.0715						22	22	22	25.8	25.8	25.8	94.276	0	229.25	579490000	156	0.0252658	0.965947	0.0226199	0.0754449	WP_029057408.1	WP_029057408.1	339
25.1359	24.9162	25.3441	24.9315	25.1106	25.2756						8	8	8	33.5	33.5	33.5	28.429	0	34.008	150100000	42	0.0570746	0.925702	0.0261758	0.165131	WP_029057411.1	WP_029057411.1	340
27.1449	27.0155	27.1552	26.9816	26.8198	26.9883						25	25	25	65.9	65.9	65.9	49.262	0	115.26	550920000	133	1.15971	0.193014	0.175303	2.46619	WP_029057414.1	WP_029057414.1	343
22.1241	22.0301	23.072	24.5905	25.3478	20.8917						17	17	17	10.5	10.5	10.5	221.23	0	36.162	72807000	33	0.352516	0.60329	-1.20126	-0.848196	WP_029057464.1	WP_029057464.1	350
22.3642	22.5232	23.1012	24.3255	24.1755	24.2552				+	LFQ intensity 2AEP_LFQ intensity NH3	4	4	4	20.6	20.6	20.6	30.45	0	18.083	58755000	13	2.65153	0.0222689	-1.58918	-6.96734	WP_029057465.1	WP_029057465.1	351
21.0729	21.5109	21.662	26.3499	25.8138	26.2142				+	LFQ intensity 2AEP_LFQ intensity NH3	14	14	14	52.5	52.5	52.5	36.507	0	81.974	204310000	56	4.40841	0.0025679	-4.71072	-19.7146	WP_029057467.1	WP_029057467.1	352
23.047	21.697	22.7321	26.4047	26.5661	26.4271				+	LFQ intensity 2AEP_LFQ intensity NH3	9	9	9	39.3	39.3	39.3	40.401	0	56.67	258470000	42	3.19414	0.0111717	-3.97396	-9.6714	WP_029057468.1	WP_029057468.1	353
21.9106	21.9662	22.9213	22.2833	22.312	21.8523						6	6	6	35	35	35	26.889	0	15.248	24115000	13	0.118121	0.858635	0.11685	0.324435	WP_029057476.1	WP_029057476.1	354
27.3348	27.1026	27.113	26.8947	26.7036	26.7572						20	20	20	56.1	56.1	56.1	53.885	0	142.42	563800000	123	1.86507	0.0722902	0.398268	4.20475	WP_029057480.1	WP_029057480.1	356
26.6812	26.6216	26.4785	26.8687	26.7096	26.66						18	18	18	49.1	49.1	49.1	52.075	0	82.451	470730000	100	0.80966	0.318554	-0.152343	-1.75007	WP_029057489.1	WP_029057489.1	359
24.7002	21.7655	25.2362	24.9044	24.3298	24.938						3	3	3	23.8	23.8	23.8	25.006	0	6.973	112100000	19	0.30583	0.647373	-0.823397	-0.750843	WP_029057493.1	WP_029057493.1	361
22.2064	22.168	23.0052	23.6745	22.0094	23.3348						5	5	5	20.8	20.8	20.8	34.461	0	10.709	29145000	21	0.401159	0.56734	-0.546372	-0.947478	WP_029057496.1	WP_029057496.1	362
23.2859	22.6849	23.1743	23.6068	22.9591	23.3853						6	6	6	19.4	19.4	19.4	45.659	0	15.388	34437000	22	0.43435	0.541627	-0.268716	-1.01424	WP_029057497.1	WP_029057497.1	363
24.7588	25.0394	25.1677	24.817	25.0515	24.6244						23	23	23	35.5	35.5	35.5	99.048	0	53.126	136190000	76	0.384153	0.579844	0.157659	0.912982	WP_029057500.1	WP_029057500.1	365
22.3155	23.0954	22.5629	23.9474	24.209	24.2143				+	LFQ intensity 2AEP_LFQ intensity NH3	7	7	7	45.7	45.7	45.7	27.774	0	10.247	53070000	17	2.39719	0.0329393	-1.46563	-5.94856	WP_029057502.1	WP_029057502.1	366
21.8768	23.2823	22.6053	23.3562	23.4176	22.6474						5	5	5	43.6	43.6	43.6	6.4366	0	8.0539	35678000	13	0.50898	0.492495	-0.552267	-1.16224	WP_029057503.1	WP_029057503.1	367
25.1444	22.1721	25.3202	25.2534	25.1745	25.5168						8	8	8	57.1	57.1	57.1	15.973	0	29.663	154160000	44	0.464396	0.525275	-1.10264	-1.07412	WP_029057508.1	WP_029057508.1	369
22.3519	22.6771	21.9587	23.3842	23.7621	24.2723						4	4	4	41.5	41.5	41.5	15.328	0	19.353	42197000	14	1.95447	0.0630244	-1.47694	-4.46641	WP_029057511.1	WP_029057511.1	371
25.6622	26.1546	25.3269	26.6395	26.7274	26.2562						26	26	26	42.5	42.5	42.5	89.302	0	117.94	372800000	96	1.3753	0.143636	-0.82644	-2.94592	WP_029057515.1	WP_029057515.1	372
27.4341	27.363	27.6404	28.2569	28.603	29.175						17	17	17	97.3	97.3	97.3	12.208	0	230.63	1430400000	160	1.89042	0.0701886	-1.1991	-4.27781	WP_029057517.1	WP_029057517.1	373
24.0497	23.5906	22.2875	24.0559	24.0913	23.8593						11	11	11	24.3	24.3	24.3	68.233	0	36.802	68365000	37	0.579672	0.448607	-0.692907	-1.30073	WP_029057523.1	WP_029057523.1	376
24.1441	24.3344	24.8775	25.4299	25.2578	25.2757						8	8	8	42.5	42.5	42.5	30.327	0	38.657	152260000	39	1.73342	0.0871509	-0.869122	-3.83904	WP_029057530.1	WP_029057530.1	377
26.5862	26.54	26.436	26.4402	26.3403	26.4116						7	7	7	52.5	52.5	52.5	22.418	0	40.02	342480000	59	1.08517	0.214698	0.123345	2.30823	WP_029057531.1	WP_029057531.1	378
25.0253	25.1305	25.4069	25.6237	25.4713	25.5217						12	12	12	46.5	46.5	46.5	42.635	0	63.478	200060000	76	1.34332	0.15127	-0.351325	-2.87236	WP_029057532.1	WP_029057532.1	379
26.7	25.3007	25.5237	24.0076	23.8859	24.1101						21	21	21	51.9	51.9	51.9	52.992	0	44.371	154500000	63	1.86098	0.0722902	1.84027	4.19305	WP_029057537.1	WP_029057537.1	381
23.6728	23.3948	23.6832	23.987	23.7308	24.3685						8	8	8	33.1	33.1	33.1	26.327	0	46.065	72196000	52	1.00421	0.242282	-0.445127	-2.14046	WP_029057541.1	WP_029057541.1	384
27.1189	27.0087	27.3047	26.9131	27.2789	27.2833						14	14	14	74.5	74.5	74.5	15.755	0	35.882	576800000	99	0.0321778	0.957712	-0.0143127	-0.0953988	WP_029057557.1	WP_029057557.1	390
28.4833	28.6011	28.6705	28.8113	28.4102	28.5526						25	25	25	69.4	69.4	69.4	37.746	0	135.46	1666700000	201	0.0163978	0.979595	-0.00640106	-0.0494296	WP_029057558.1	WP_029057558.1	391
25.8283	25.5	26.0067	25.6252	25.8547	26.0661						8	8	8	37.2	37.2	37.2	13.996	0	120.64	243870000	72	0.132416	0.840256	-0.0703456	-0.359788	WP_029057559.1	WP_029057559.1	392
26.4973	26.6464	26.5543	25.842	26.2139	26.3596						15	15	15	76.2	76.2	76.2	13.784	0	46	320690000	87	1.25329	0.170016	0.427494	2.66993	WP_029057560.1	WP_029057560.1	393
25.3743	22.3894	25.5017	24.8642	25.4208	25.3788						6	6	6	51.5	51.5	51.5	21.211	0	51.322	166310000	27	0.316989	0.636681	-0.799473	-0.774326	WP_029057561.1	WP_029057561.1	394
24.3899	22.5468	22.9021	23.0622	23.4561	23.3983						4	4	4	11.3	11.3	11.3	47.964	0	11.898	48149000	19	0.0148789	0.981241	-0.0259552	-0.0449252	WP_029057562.1	WP_029057562.1	395
26.3453	26.1965	26.5143	25.7415	25.9462	25.9235						13	13	13	62.8	62.8	62.8	16.097	0	40.393	257640000	72	1.89326	0.0700733	0.481609	4.28604	WP_029057563.1	WP_029057563.1	396
23.297	23.085	23.1899	24.0115	23.7186	24.2154				+	LFQ intensity 2AEP_LFQ intensity NH3	4	4	4	59.4	59.4	59.4	7.2484	0	12.21	56806000	23	2.14119	0.0469597	-0.791215	-5.05129	WP_029057564.1	WP_029057564.1	397
27.4293	27.307	27.5214	27.4085	27.552	27.682						15	15	15	66.5	66.5	66.5	20.646	0	77.442	818000000	92	0.56731	0.455999	-0.128259	-1.27659	WP_029057565.1	WP_029057565.1	398
26.1043	25.8437	26.7264	26.0621	26.234	26.3092						7	7	7	59.2	59.2	59.2	12.984	0	138.74	279620000	46	0.0284027	0.962521	0.0229816	0.0845348	WP_029057566.1	WP_029057566.1	399
26.6291	26.377	26.9929	26.5009	26.6604	26.7617						11	11	11	59.9	59.9	59.9	19.254	0	27.108	408630000	62	0.0445588	0.937351	0.0253417	0.130477	WP_029057567.1	WP_029057567.1	400
26.7323	26.4112	26.8925	26.6391	26.5141	26.7239						8	8	8	68.2	68.2	68.2	14.616	0	46.435	427960000	80	0.125934	0.845884	0.0529766	0.343837	WP_029057568.1	WP_029057568.1	401
26.4113	25.9617	26.0938	25.4189	25.9245	26.0111						6	6	6	37.6	37.6	37.6	11.601	0	58.415	263940000	47	0.747146	0.351092	0.370756	1.62731	WP_029057569.1	WP_029057569.1	402
24.8146	24.192	24.9417	25.243	25.5919	25.5857						11	11	11	77.1	77.1	77.1	11.256	0	78.293	172760000	61	1.47666	0.126035	-0.82408	-3.1852	WP_029057571.1	WP_029057571.1	403
26.7231	26.331	26.79	26.5699	26.6553	26.8611						13	13	13	68	68	68	13.391	0	110.01	414240000	92	0.183996	0.775306	-0.080698	-0.482539	WP_029057572.1	WP_029057572.1	404
26.5523	26.1929	26.5588	26.2182	26.1888	26.3151						9	9	9	83.8	83.8	83.8	9.1383	0	47.323	338220000	75	0.697053	0.379374	0.19392	1.52947	WP_029057573.1	WP_029057573.1	405
25.55	22.7301	24.8255	26.035	25.7257	26.072						5	5	5	60.6	60.6	60.6	7.6888	0	73.688	226710000	31	0.859175	0.294515	-1.57568	-1.84805	WP_029057574.1	WP_029057574.1	406
26.8259	26.4301	26.8443	26.0735	26.5253	26.7142						6	6	6	48.9	48.9	48.9	15.437	0	23.49	369450000	55	0.490209	0.507158	0.262424	1.12523	WP_029057575.1	WP_029057575.1	407
28.288	28.1642	28.2754	27.9469	28.1664	28.0201						21	21	21	68.1	68.1	68.1	26.634	0	195.79	1137700000	184	1.23098	0.175628	0.198058	2.62077	WP_029057576.1	WP_029057576.1	408
26.6446	26.2889	26.8146	26.3625	26.5876	26.6363						8	8	8	65.9	65.9	65.9	13.878	0	92.696	399260000	67	0.110565	0.867583	0.0538686	0.30548	WP_029057577.1	WP_029057577.1	409
26.0981	25.7381	26.3425	25.6912	25.6052	26.1333						6	6	6	48.9	48.9	48.9	10.452	0	22.995	257200000	59	0.447495	0.532678	0.249667	1.04049	WP_029057578.1	WP_029057578.1	410
27.2954	26.9455	27.1239	26.329	27.0675	27.0024						19	19	19	57	57	57	30.055	0	180.04	522800000	99	0.555625	0.464261	0.321908	1.25374	WP_029057579.1	WP_029057579.1	411
25.7004	25.8265	25.755	25.9224	25.7384	26.0383						7	7	7	79.4	79.4	79.4	10.471	0	63.472	235660000	50	0.666192	0.398239	-0.139058	-1.46932	WP_029057580.1	WP_029057580.1	412
28.3427	28.2078	28.7455	28.0435	28.1431	28.2337						10	10	10	47.6	47.6	47.6	22.465	0	114.29	1241700000	122	0.789858	0.329385	0.291908	1.71109	WP_029057581.1	WP_029057581.1	413
27.3736	27.3473	27.7939	27.439	27.5686	27.6242						16	16	16	70.3	70.3	70.3	25.158	0	139.14	750690000	111	0.0896833	0.889514	-0.0390021	-0.25205	WP_029057582.1	WP_029057582.1	414
26.3182	25.4138	26.4523	25.8753	26.0298	26.379						10	10	10	68.6	68.6	68.6	11.568	0	25.835	281590000	56	0.0312208	0.958851	-0.0332197	-0.0926526	WP_029057583.1	WP_029057583.1	415
25.2574	25.2694	24.9575	24.3813	24.9238	24.8781						9	9	9	31.8	31.8	31.8	53.697	0	46.371	129980000	39	1.01028	0.242065	0.433739	2.15293	WP_029057594.1	WP_029057594.1	416
22.2077	21.623	23.2941	23.4897	22.551	22.8561						6	6	6	30.1	30.1	30.1	26.534	0	5.789	44130000	14	0.452497	0.529973	-0.590655	-1.05046	WP_029057604.1	WP_029057604.1	419
27.6441	27.6287	27.5085	27.5251	27.7285	27.5421						38	38	38	49.6	49.6	49.6	85.647	0	237.05	853200000	225	0.0204336	0.97319	-0.00478299	-0.0613286	WP_029057607.1	WP_029057607.1	420
25.3895	25.1731	24.4201	25.9206	25.6822	25.7213						10	10	10	27.5	27.5	27.5	40.357	0	28.676	218800000	60	1.21079	0.181072	-0.780498	-2.57661	WP_029057609.1	WP_029057609.1	422
22.7751	21.1426	22.8375	24.0024	24.4459	24.6605						8	8	8	30.6	30.6	30.6	39.092	0	27.349	67827000	26	1.64419	0.0971875	-2.11786	-3.60344	WP_029057612.1	WP_029057612.1	423
25.617	25.2642	25.3124	26.0538	25.4931	25.5174						21	21	21	48.1	48.1	48.1	59.536	0	110.45	221490000	76	0.608892	0.433287	-0.290185	-1.35771	WP_029057613.1	WP_029057613.1	424
22.2796	21.8199	22.1365	21.1093	23.2842	23.3965						4	4	4	15.3	15.3	15.3	27.696	0	6.1123	21352000	10	0.274732	0.677963	-0.518009	-0.684585	WP_029057614.1	WP_029057614.1	425
21.5281	23.5414	23.7107	23.9788	23.9299	24.058						5	5	5	18.5	18.5	18.5	37.622	0	11.865	56184000	21	0.688619	0.385511	-1.06219	-1.51302	WP_029057617.1	WP_029057617.1	426
22.8847	22.015	22.0283	22.7913	21.6849	21.792						5	5	5	14.7	14.7	14.7	41.539	0	12.035	14940000	22	0.184419	0.775306	0.219928	0.483516	WP_029057629.1	WP_029057629.1	429
23.1069	21.8965	22.8056	23.8065	23.5586	23.267						4	4	4	16.5	16.5	16.5	41.852	0	11.068	43239000	13	1.11811	0.205249	-0.941007	-2.3776	WP_029057631.1	WP_029057631.1	430
22.2251	22.9057	22.6235	22.6815	22.4447	21.8123						7	7	7	15.7	15.7	15.7	62.893	0	19.875	22258000	28	0.345734	0.610558	0.27195	0.834194	WP_029057634.1	WP_029057634.1	433
22.3949	23.5762	22.6037	24.1665	24.2478	24.0332						16	16	16	30.7	30.7	30.7	74.097	0	78.82	60846000	50	1.60195	0.103544	-1.29093	-3.49514	WP_029057639.1	WP_029057639.1	435
26.2856	26.2941	26.3443	26.6319	26.6499	26.865				+	LFQ intensity 2AEP_LFQ intensity NH3	15	15	15	52	52	52	37.015	0	86.826	440410000	111	2.21171	0.0427821	-0.4076	-5.28681	WP_029057658.1	WP_029057658.1	442
26.8866	26.704	26.648	23.7983	22.396	22.4133				+	LFQ intensity 2AEP_LFQ intensity NH3	9	9	9	19.7	19.7	19.7	61.048	0	76.651	164790000	29	2.92845	0.0153757	3.87697	8.247	WP_029057662.1	WP_029057662.1	443
26.5522	26.5166	26.6475	25.178	24.9455	24.936				+	LFQ intensity 2AEP_LFQ intensity NH3	16	16	16	33.2	33.2	33.2	39.409	0	58.127	216650000	87	4.21227	0.00332684	1.55225	17.5906	WP_029057663.1	WP_029057663.1	444
25.6507	25.5488	25.805	26.2464	26.4271	26.1255				+	LFQ intensity 2AEP_LFQ intensity NH3	16	16	16	6.5	6.5	6.5	346.57	0	90.137	317940000	91	2.18633	0.0439392	-0.598171	-5.20109	WP_029057666.1	WP_029057666.1	445
26.0523	25.693	25.9163	26.4695	25.9321	26.7787						10	10	10	71.5	71.5	71.5	18.535	0	52.399	321950000	52	0.877632	0.286075	-0.506224	-1.88479	WP_029057667.1	WP_029057667.1	446
26.3543	25.791	25.8235	26.6238	26.4629	27.1443						9	9	9	64.5	64.5	64.5	18.152	0	103.15	472040000	114	1.28574	0.164032	-0.754083	-2.74213	WP_029057668.1	WP_029057668.1	447
25.689	25.3956	25.8464	26.5207	26.038	26.8873						5	5	5	46.2	46.2	46.2	18.461	0	18.56	355800000	57	1.3998	0.13959	-0.838313	-3.00287	WP_029057669.1	WP_029057669.1	448
25.9262	25.6734	26.1045	26.1975	25.9589	26.371						10	10	10	57	57	57	27.965	0	99.598	300120000	74	0.726472	0.362486	-0.274432	-1.58689	WP_029057671.1	WP_029057671.1	449
22.8277	22.0806	22.4059	23.7109	23.3799	23.5107						8	8	8	32.4	32.4	32.4	26.186	0	32.209	41150000	25	2.00819	0.058669	-1.09581	-4.62919	WP_029057672.1	WP_029057672.1	450
24.3403	24.2497	23.8278	24.6175	24.1828	24.2193						12	12	12	31	31	31	48.675	0	39.702	95864000	47	0.403951	0.564728	-0.200629	-0.953121	WP_029057676.1	WP_029057676.1	453
23.6642	23.5078	22.9612	23.9269	24.2405	22.4419						4	4	4	19.5	19.5	19.5	26.879	0	8.2249	33906000	17	0.0954641	0.883738	-0.15866	-0.267002	WP_029057677.1	WP_029057677.1	454
27.524	27.4134	27.4323	26.9697	27.4007	27.2004						11	11	11	64.9	64.9	64.9	22.188	0	185.41	673090000	92	0.965904	0.25621	0.266278	2.06232	WP_029057690.1	WP_029057690.1	455
21.3525	22.2295	24.8266	21.1707	25.0634	25.1328						3	3	3	28.1	28.1	28.1	9.5479	0	5.9578	95977000	14	0.231016	0.720588	-0.986113	-0.589081	WP_029057691.1	WP_029057691.1	456
23.4285	21.5807	22.5761	23.5768	23.3825	23.7071						7	7	7	33.4	33.4	33.4	37.218	0	15.646	43391000	22	0.882304	0.285124	-1.02702	-1.8941	WP_029057693.1	WP_029057693.1	457
22.7926	21.0914	22.4662	23.3877	21.73	23.2309						3	3	3	9.3	9.3	9.3	44.733	0	10.284	27872000	16	0.376555	0.586463	-0.666146	-0.897501	WP_029057694.1	WP_029057694.1	458
27.8583	27.609	27.2536	27.9558	27.7247	27.8072						22	22	22	61.6	61.6	61.6	47.513	0	177.71	997920000	146	0.609652	0.433212	-0.255582	-1.3592	WP_029057699.1	WP_029057699.1	460
24.3494	21.2059	24.3418	24.8699	24.6415	24.7942						8	8	8	48.8	48.8	48.8	26.509	0	27.709	103930000	34	0.631231	0.416815	-1.46948	-1.40123	WP_029057702.1	WP_029057702.1	462
21.4441	21.493	22.3662	23.4727	23.8642	21.8759						3	3	3	10.5	10.5	10.5	44.722	0	18.721	34700000	8	0.89647	0.281541	-1.30317	-1.9224	WP_029057703.1	WP_029057703.1	463
27.2773	27.4045	27.369	27.7679	27.806	27.5272						15	15	15	72.4	72.4	72.4	35.31	0	146.96	857790000	109	1.67317	0.0945354	-0.350105	-3.67893	WP_029057708.1	WP_029057708.1	465
24.4444	24.0849	24.38	24.5857	24.7707	24.8947						13	13	13	46.1	46.1	46.1	46.963	0	37.987	111160000	43	1.45716	0.129633	-0.447247	-3.13841	WP_029057711.1	WP_029057711.1	466
23.3657	21.7274	23.7616	23.5246	23.7357	23.343						6	6	6	39.9	39.9	39.9	22.028	0	17.694	42556000	24	0.388037	0.577289	-0.582848	-0.92088	WP_029057712.1	WP_029057712.1	467
31.0984	31.0549	30.9408	30.6539	30.5864	30.4806				+	LFQ intensity 2AEP_LFQ intensity NH3	57	57	57	80.7	80.7	80.7	63.153	0	323.31	7230100000	545	2.57391	0.0246461	0.457781	6.6417	WP_029057713.1	WP_029057713.1	468
22.0199	21.5169	24.6769	24.3558	24.8162	24.6885						5	5	5	28.3	28.3	28.3	27.58	0	23.95	101310000	19	0.886054	0.285124	-1.88228	-1.90159	WP_029057714.1	WP_029057714.1	469
23.9711	23.5867	23.2689	24.0891	23.8448	24.1645						4	4	4	36.7	36.7	36.7	11.216	0	19.397	66404000	21	0.878242	0.286075	-0.423909	-1.886	WP_029057716.1	WP_029057716.1	471
21.9326	21.7255	21.9226	22.3291	22.261	23.0849						1	1	1	16.1	16.1	16.1	12.802	0	10.824	21203000	11	1.20399	0.181749	-0.698087	-2.5618	WP_029057717.1	WP_029057717.1	472
21.7328	21.6014	22.7452	22.519	22.4374	21.3991						6	6	6	35.6	35.6	35.6	23.883	0	11.612	18591000	10	0.0626597	0.923036	-0.0920531	-0.180351	WP_029057719.1	WP_029057719.1	473
24.506	24.7425	24.6395	24.5966	24.6508	24.7145						5	5	5	67.9	67.9	67.9	11.535	0	27.895	102720000	30	0.116979	0.86003	-0.0245921	-0.321581	WP_029057720.1	WP_029057720.1	474
27.7321	27.657	27.3148	27.4999	27.211	27.4186						22	22	22	56.1	56.1	56.1	51.041	0	228.67	762760000	137	0.547809	0.470562	0.19144	1.23845	WP_029057724.1	WP_029057724.1	477
22.5464	21.9545	24.4199	24.3375	24.6266	24.5735						11	11	11	63.4	63.4	63.4	26.667	0	63.391	85588000	45	0.962998	0.257385	-1.53891	-2.05642	WP_029057728.1	WP_029057728.1	480
25.6445	25.8122	24.0613	27.2543	27.0821	27.0673						25	25	25	60.1	60.1	60.1	57.959	0	125.78	501290000	121	1.60272	0.103544	-1.96193	-3.49709	WP_029057730.1	WP_029057730.1	482
25.5319	25.5457	25.8179	25.355	25.7606	25.8457						8	8	8	41.5	41.5	41.5	13.754	0	87.499	229660000	50	0.0420129	0.941478	-0.021918	-0.123331	WP_029057738.1	WP_029057738.1	486
26.2613	26.428	26.4572	26.3892	26.4097	26.4139						27	27	27	38.1	38.1	38.1	89.875	0	175.35	371720000	159	0.132213	0.840256	-0.0221004	-0.359289	WP_029057739.1	WP_029057739.1	487
28.5733	28.4465	28.7687	28.7865	28.51	28.5199						27	27	27	88.2	88.2	88.2	40.753	0	156.18	1569600000	227	0.0238758	0.968157	-0.00930468	-0.0713986	WP_029057742.1	WP_029057742.1	488
23.1538	21.3283	21.389	22.9869	23.0181	23.4653						3	3	3	46.6	46.6	46.6	9.6361	0	18.233	27017000	15	0.90552	0.277941	-1.19972	-1.94052	WP_029057744.1	WP_029057744.1	489
26.3635	25.8126	26.5479	26.8351	26.5279	27.0857						14	14	14	52.1	52.1	52.1	27.914	0	59.277	451560000	68	0.985419	0.250254	-0.574902	-2.10204	WP_029057745.1	WP_029057745.1	490
25.6018	25.5561	23.6193	26.171	25.8609	25.6831						18	18	18	42.7	42.7	42.7	57.935	0	71.254	235420000	67	0.663681	0.398239	-0.979301	-1.46443	WP_029057748.1	WP_029057748.1	492
24.2134	23.9312	24.1279	23.8465	24.5403	24.9912						5	5	5	51.1	51.1	51.1	14.457	0	25.824	86595000	39	0.464138	0.525275	-0.368506	-1.07361	WP_029057750.1	WP_029057750.1	493
31.3609	31.3973	30.9912	31.3715	31.1721	31.2984						38	38	38	82.5	82.5	82.5	51.52	0	323.31	10675000000	595	0.0763579	0.906562	-0.0308717	-0.21708	WP_029057751.1	WP_029057751.1	494
27.3447	27.2789	27.7126	27.7859	27.7208	27.8258						16	16	16	49.3	49.3	49.3	32.287	0	87.372	844070000	105	1.12885	0.201906	-0.33215	-2.40036	WP_029057752.1	WP_029057752.1	495
31.0419	30.9702	30.8987	30.984	30.8982	30.8418						52	52	52	72.1	72.1	72.1	54.942	0	323.31	8204400000	611	0.459996	0.528045	0.0622927	1.06538	WP_029057753.1	WP_029057753.1	496
27.3383	27.507	27.5556	27.556	27.4782	27.5253						20	20	20	89.8	89.8	89.8	19.613	0	182.9	775230000	111	0.309552	0.64411	-0.0528196	-0.758692	WP_029057754.1	WP_029057754.1	497
25.8072	25.8006	22.7994	26.0167	25.8955	26.2013						8	8	8	54.8	54.8	54.8	22.931	0	30.753	248160000	25	0.542834	0.473361	-1.23538	-1.22871	WP_029057756.1	WP_029057756.1	498
28.7539	28.7223	28.6606	28.7877	28.8578	28.7657						28	28	28	56.7	56.7	56.7	49.183	0	281.49	1914100000	299	1.10172	0.207638	-0.0914268	-2.343	WP_029057760.1	WP_029057760.1	499
27.4605	27.4682	27.6081	27.847	27.7519	27.8151				+	LFQ intensity 2AEP_LFQ intensity NH3	26	26	26	51.1	51.1	51.1	53.687	0	237.8	946830000	190	2.20594	0.0427821	-0.29237	-5.26721	WP_029057762.1	WP_029057762.1	500
28.1932	28.4022	27.9088	28.1726	28.5852	28.1061						43	43	43	41.3	41.3	41.3	111.99	0	323.31	1358700000	288	0.226398	0.72606	-0.119883	-0.578807	WP_029057763.1	WP_029057763.1	501
27.6712	27.7815	28.0336	28.959	28.7797	28.9171				+	LFQ intensity 2AEP_LFQ intensity NH3	21	21	21	52.6	52.6	52.6	30.903	0	181.92	1667100000	165	3.0347	0.013948	-1.05648	-8.7917	WP_029057764.1	WP_029057764.1	502
28.8986	29.2086	28.6439	29.7231	29.4543	29.6137						36	36	36	79.4	79.4	79.4	42.122	0	323.31	3046400000	345	1.70297	0.0900605	-0.680011	-3.75757	WP_029057765.1	WP_029057765.1	503
29.1026	29.3642	29.2513	30.0673	29.8735	29.9326				+	LFQ intensity 2AEP_LFQ intensity NH3	25	25	25	95.6	95.6	95.6	33.612	0	323.31	3884700000	275	2.78511	0.0195076	-0.718388	-7.56065	WP_029057766.1	WP_029057766.1	504
22.5836	23.7882	24.1747	24.071	22.3036	23.9929						2	2	2	15.5	15.5	15.5	18.667	0	10.133	55911000	16	0.0266912	0.964549	0.0596587	0.0795824	WP_029057769.1	WP_029057769.1	506
24.9263	25.0287	25.3508	25.9025	25.8107	26.0366				+	LFQ intensity 2AEP_LFQ intensity NH3	13	13	13	46.2	46.2	46.2	29.821	0	26.063	221900000	68	2.32068	0.0363448	-0.814649	-5.66788	WP_029057772.1	WP_029057772.1	507
28.6028	28.451	28.4776	28.9342	29.0053	29.0465				+	LFQ intensity 2AEP_LFQ intensity NH3	30	30	30	55.5	55.5	55.5	66.307	0	319.8	2054200000	259	2.97537	0.0149778	-0.484856	-8.48361	WP_029057774.1	WP_029057774.1	508
21.5051	22.6937	22.7464	22.9047	23.1115	22.3894						3	3	3	7.9	7.9	7.9	44.461	0	3.8978	28011000	12	0.458042	0.528045	-0.486809	-1.0615	WP_029057783.1	WP_029057783.1	511
24.7983	24.7424	24.5539	24.5274	24.5994	24.6441						10	10	9	28.4	28.4	25.6	59.167	0	94.163	105640000	54	0.592381	0.439691	0.107887	1.32552	WP_029057785.1	WP_029057785.1	512
22.8016	22.5404	22.8341	22.0237	22.2085	21.8988				+	LFQ intensity 2AEP_LFQ intensity NH3	2	2	2	10.8	10.8	10.8	40.765	0	16.527	15124000	7	2.20669	0.0427821	0.681716	5.26977	WP_029057788.1	WP_029057788.1	513
25.8262	26.0125	25.9865	26.7595	26.6819	26.7548				+	LFQ intensity 2AEP_LFQ intensity NH3	7	7	7	55.7	55.7	55.7	19.553	0	98.283	408000000	60	3.62211	0.0068241	-0.790366	-12.4583	WP_029057791.1	WP_029057791.1	514
23.8487	21.8464	21.9031	24.1758	23.1294	23.2056						6	6	6	20.6	20.6	20.6	32.406	0	15.412	48896000	19	0.585997	0.444833	-0.970852	-1.31307	WP_029057792.1	WP_029057792.1	515
24.435	24.5022	24.6019	24.6793	24.3934	24.5296						7	7	7	25.8	25.8	25.8	36.133	0	20.303	97005000	36	0.0774975	0.906562	-0.0210781	-0.2201	WP_029057793.1	WP_029057793.1	516
25.154	24.4003	25.1957	25.387	25.3676	26.0692						11	11	11	59.7	59.7	59.7	23.346	0	53.351	199960000	63	0.932696	0.266954	-0.691231	-1.99514	WP_029057794.1	WP_029057794.1	517
21.9797	22.5446	23.3516	23.6779	23.658	24.302						4	4	4	28.1	28.1	28.1	27.551	0	15.785	45910000	14	1.3035	0.160541	-1.25398	-2.782	WP_029057795.1	WP_029057795.1	518
30.2739	30.4828	30.2577	29.9803	30.1096	29.9063						62	62	62	73.2	73.2	73.2	75.923	0	323.31	4612500000	552	1.65081	0.0964556	0.339371	3.6206	WP_029057797.1	WP_029057797.1	519
26.2129	25.767	26.3916	26.1765	26.0291	26.3275						10	10	10	58.4	58.4	58.4	10.193	0	15.484	341360000	59	0.0940001	0.885362	-0.0538909	-0.263228	WP_029057798.1	WP_029057798.1	520
27.7143	28.1236	27.7152	27.579	28.2545	27.8446						45	45	45	66.8	66.8	66.8	96.696	0	323.31	1058300000	257	0.0603826	0.923036	-0.0416463	-0.174163	WP_029057800.1	WP_029057800.1	521
27.356	27.2899	27.3608	27.4075	27.0655	27.2341						25	25	25	63.1	63.1	63.1	42.011	0	235.47	687010000	176	0.420089	0.551047	0.0998828	0.985637	WP_029057802.1	WP_029057802.1	522
25.1402	24.6349	25.3111	24.3408	24.2593	24.5347						5	5	5	60.7	60.7	60.7	14.884	0	11.325	89452000	33	1.38684	0.140877	0.650457	2.97268	WP_029057803.1	WP_029057803.1	523
23.7364	23.3498	23.8964	23.1931	22.672	22.9601						5	5	5	33.2	33.2	33.2	20.214	0	11.137	33258000	26	1.50236	0.120218	0.719154	3.24744	WP_029057811.1	WP_029057811.1	526
26.8667	26.4063	26.865	26.7905	26.6773	26.5796						20	20	20	49.3	49.3	49.3	47.715	0	82.428	465690000	96	0.0636742	0.923036	0.0301838	0.183099	WP_029057813.1	WP_029057813.1	528
24.2802	24.027	24.6682	24.5151	24.4124	24.4928						4	4	4	29.6	29.6	29.6	19.681	0	22.852	90811000	21	0.321872	0.632037	-0.148319	-0.784558	WP_029057814.1	WP_029057814.1	529
21.9523	23.58	23.9131	22.3443	23.8963	23.8113						4	4	4	24.4	24.4	24.4	20.147	0	6.5903	48952000	14	0.0914452	0.887966	-0.202185	-0.256621	WP_029057819.1	WP_029057819.1	531
24.041	23.9465	23.0449	24.0673	23.709	24.0795						10	10	10	33.5	33.5	33.5	40.245	0	18.946	63387000	38	0.332819	0.623703	-0.274443	-0.807401	WP_029057825.1	WP_029057825.1	533
27.9105	27.6623	28.1148	28.0209	27.9759	27.8644						27	27	27	49.7	49.7	49.7	68.927	0	235.61	1030500000	204	0.156019	0.813963	-0.0578709	-0.416827	WP_029057827.1	WP_029057827.1	534
25.5203	25.31	26.0351	25.9068	25.9278	25.957						17	17	17	56	56	56	30.39	0	125.58	243310000	89	0.646165	0.409917	-0.308743	-1.43032	WP_029057829.1	WP_029057829.1	535
24.8778	25.4571	25.1441	25.1221	25.3166	25.3847						10	10	10	69.6	69.6	69.6	21.066	0	101.9	165160000	58	0.245325	0.708474	-0.114809	-0.620679	WP_029057843.1	WP_029057843.1	537
23.2562	22.9527	23.0695	21.8904	23.4293	23.6194						8	8	8	42.1	42.1	42.1	29.138	0	17.11	35220000	14	0.0714284	0.912605	0.113095	0.203958	WP_029057845.1	WP_029057845.1	539
24.0702	22.2973	22.0339	24.5348	24.3464	24.3817						6	6	6	42.2	42.2	42.2	23.271	0	48.21	78123000	22	1.1866	0.18418	-1.62054	-2.52409	WP_029057846.1	WP_029057846.1	540
26.2245	26.0252	26.4491	26.2581	26.1997	25.9161						13	13	13	43.7	43.7	43.7	39.718	0	146.66	329820000	87	0.26778	0.684851	0.108283	0.669595	WP_029057862.1	WP_029057862.1	546
22.6406	22.1195	22.7633	25.5045	25.3798	25.6438				+	LFQ intensity 2AEP_LFQ intensity NH3	6	6	6	26.1	26.1	26.1	38.964	0	29.611	130980000	21	3.84361	0.00471357	-3.00157	-14.1866	WP_029057881.1	WP_029057881.1	549
24.6116	24.582	24.8911	24.3617	24.3464	24.6071						8	8	8	36.3	36.3	36.3	37.235	0	26.341	101610000	39	0.923613	0.270385	0.256484	1.97685	WP_029057894.1	WP_029057894.1	554
29.1596	28.9996	29.1163	21.8966	22.167	21.5127				+	LFQ intensity 2AEP_LFQ intensity NH3	13	13	13	92	92	92	11.994	0	166.27	685280000	74	5.49446	0.000822774	7.23305	36.9507	WP_029057933.1	WP_029057933.1	560
25.1174	24.998	25.6975	24.5327	21.2808	24.421						7	7	7	16.4	16.4	16.4	55.537	0	40.273	85222000	25	0.78921	0.329385	1.85943	1.70981	WP_029057936.1	WP_029057936.1	561
21.5228	21.0867	24.3707	24.3222	24.1406	24.3802						3	3	3	21.7	21.7	21.7	22.179	0	33.473	65341000	13	0.881861	0.285124	-1.95426	-1.89322	WP_029057938.1	WP_029057938.1	563
28.3797	28.3714	28.2927	29.8319	29.6119	29.7899				+	LFQ intensity 2AEP_LFQ intensity NH3	22	22	22	68.2	68.2	68.2	40.76	0	323.31	2967700000	182	4.35861	0.00271995	-1.39665	-19.1526	WP_029057939.1	WP_029057939.1	564
25.483	25.599	26.1171	26.3389	26.22	26.3393						11	11	11	40.5	40.5	40.5	25.333	0	101.32	303490000	56	1.33214	0.153047	-0.566366	-2.84685	WP_029057940.1	WP_029057940.1	565
21.1656	22.0937	23.3442	22.2327	22.0461	22.3788						4	4	4	20.6	20.6	20.6	18.774	0	8.965	14982000	12	0.00927264	0.990076	-0.0179869	-0.0281709	WP_029057944.1	WP_029057944.1	567
28.9025	28.6934	28.6682	28.6947	28.389	28.3128						36	36	36	75.1	75.1	75.1	45.522	0	298.04	1611100000	279	0.979992	0.251766	0.289212	2.09098	WP_029057949.1	WP_029057949.1	570
25.7085	25.7069	25.8383	25.7771	25.6027	26.0402						9	9	9	40.9	40.9	40.9	39.008	0	48.216	258330000	45	0.15412	0.815827	-0.0554072	-0.412297	WP_029057953.1	WP_029057953.1	573
26.1185	26.009	25.7939	26.1673	26.2201	25.8335						18	18	18	38.7	38.7	38.7	66.289	0	86.327	312760000	102	0.257751	0.693905	-0.0998185	-0.647845	WP_029057958.1	WP_029057958.1	575
29.341	29.598	29.1935	28.9925	29.8559	29.0316						92	92	92	63.1	63.1	63.1	177.12	0	323.31	2849000000	540	0.0988558	0.881586	0.0841802	0.275716	WP_029057960.1	WP_029057960.1	576
23.7964	23.6687	23.5326	24.6153	24.0378	24.0943						4	4	4	16.1	16.1	16.1	33.46	0	12.884	74238000	26	1.36888	0.145332	-0.583195	-2.93108	WP_029057962.1	WP_029057962.1	577
21.7292	23.0967	23.6564	21.5854	23.1765	22.4865						3	3	3	35	35	35	14.199	0	10.289	9461300	10	0.217903	0.734302	0.411318	0.559807	WP_029057965.1	WP_029057965.1	579
23.2429	23.1478	21.788	23.1954	23.2945	22.976						5	5	5	29.5	29.5	29.5	25.279	0	21.629	37860000	22	0.375486	0.586463	-0.429081	-0.895318	WP_029057967.1	WP_029057967.1	581
23.4034	23.3488	23.1242	24.275	24.3367	24.4564				+	LFQ intensity 2AEP_LFQ intensity NH3	6	6	6	29.7	29.7	29.7	31.323	0	20.904	75593000	24	3.34334	0.00956812	-1.06386	-10.5682	WP_029057975.1	WP_029057975.1	583
25.654	25.3274	25.59	25.6976	25.9189	26.0176						8	8	8	57.5	57.5	57.5	16.787	0	51.872	235480000	42	1.20966	0.181072	-0.354217	-2.57416	WP_029057977.1	WP_029057977.1	584
24.6366	24.6977	24.5836	24.9329	24.8748	24.6428						7	7	7	29.7	29.7	29.7	47.279	0	47.031	131250000	38	0.873949	0.287956	-0.177536	-1.87745	WP_029057980.1	WP_029057980.1	585
23.9559	23.8742	24.0919	24.2265	23.9537	24.1112						11	11	11	32.4	32.4	32.4	39.212	0	20.94	75998000	46	0.535285	0.475846	-0.123107	-1.21391	WP_029057982.1	WP_029057982.1	586
21.4484	22.2843	22.7369	22.877	22.6162	22.8616						3	3	3	25.4	25.4	25.4	15.293	0.00063251	2.8513	15063000	7	0.74592	0.351468	-0.628397	-1.62491	WP_029057985.1	WP_029057985.1	588
26.9375	27.0568	26.9179	27.8232	27.6099	27.6877				+	LFQ intensity 2AEP_LFQ intensity NH3	17	17	17	54.1	54.1	54.1	37.477	0	284.62	843730000	147	3.19816	0.0111717	-0.736198	-9.69457	WP_029057988.1	WP_029057988.1	590
23.3458	23.5699	22.3555	23.5465	23.6268	23.539						8	8	8	15.7	15.7	15.7	69.945	0	15.589	52117000	36	0.57101	0.455561	-0.480349	-1.28381	WP_029057990.1	WP_029057990.1	591
27.2411	27.1751	27.2206	27.6499	27.5891	27.565				+	LFQ intensity 2AEP_LFQ intensity NH3	17	17	17	60.4	60.4	60.4	36.993	0	147.02	809800000	109	3.58516	0.00691876	-0.38907	-12.1905	WP_029057991.1	WP_029057991.1	592
22.6196	24.7025	23.9966	22.9367	24.3331	24.5623						6	6	6	23.8	23.8	23.8	48.519	0	24.709	67522000	25	0.0756704	0.906562	-0.171139	-0.215257	WP_029057994.1	WP_029057994.1	593
26.7432	26.7451	26.9829	27.2454	27.1316	27.1539						15	15	15	62.3	62.3	62.3	38.003	0	187.26	615490000	130	1.81607	0.0777249	-0.35324	-4.06599	WP_029057997.1	WP_029057997.1	594
26.5162	26.8138	23.322	27.0814	26.8404	26.8238						12	12	12	35.4	35.4	35.4	47.706	0	40.291	463750000	74	0.537119	0.474822	-1.36453	-1.21751	WP_029058004.1	WP_029058004.1	597
27.6007	27.9656	27.3993	28.915	28.3892	28.5541						40	40	40	69.2	69.2	69.2	73.232	0	323.31	1524400000	211	1.87922	0.0716722	-0.964247	-4.24543	WP_029058005.1	WP_029058005.1	598
23.9822	23.4809	24.0881	23.8299	24.4531	24.458						6	6	6	59.3	59.3	59.3	15.196	0	37.709	74376000	33	0.638179	0.413441	-0.396569	-1.41477	WP_029058011.1	WP_029058011.1	600
24.7973	24.3551	25.3343	25.0213	24.9585	25.039						6	6	6	43.7	43.7	43.7	20.468	0	27.249	131480000	49	0.246909	0.706683	-0.177358	-0.624155	WP_029058016.1	WP_029058016.1	602
26.3769	26.4702	26.1469	26.1145	26.3527	26.0664						23	23	23	26.6	26.6	26.6	97.97	0	83.721	332620000	128	0.515322	0.490355	0.153466	1.17472	WP_029058017.1	WP_029058017.1	603
22.0569	22.2	23.0317	22.362	21.7866	21.995						5	5	5	27.6	27.6	27.6	24.572	0	11.687	17153000	19	0.476798	0.51726	0.381641	1.09872	WP_029058018.1	WP_029058018.1	604
24.5902	24.8191	24.25	24.3646	24.6413	24.5558						18	18	18	45.9	45.9	45.9	53.961	0	47.631	95250000	58	0.0611956	0.923036	0.0325356	0.176375	WP_029058020.1	WP_029058020.1	605
26.0885	25.6151	26.1434	25.7898	26.0319	26.1451						12	12	12	65.4	65.4	65.4	14.14	0	38.845	265010000	73	0.0707084	0.912605	-0.0399475	-0.202032	WP_029058021.1	WP_029058021.1	606
28.276	27.763	28.5187	28.0935	28.224	28.3979						17	17	17	80.7	80.7	80.7	17.655	0	135.64	1254700000	127	0.0772826	0.906562	-0.0525913	-0.219531	WP_029058025.1	WP_029058025.1	607
25.3966	24.863	25.4539	24.972	25.0805	25.3274						10	10	10	61.4	61.4	61.4	20.361	0	58.562	157240000	49	0.198503	0.757055	0.111195	0.51589	WP_029058029.1	WP_029058029.1	609
21.3063	22.6542	22.7824	23.6908	23.7315	23.4535						5	5	5	20.8	20.8	20.8	45.967	0	12.857	50837000	14	1.34235	0.15127	-1.37766	-2.87014	WP_029058032.1	WP_029058032.1	610
27.0569	26.9506	27.015	26.8557	26.616	26.7068						20	20	20	39.2	39.2	39.2	51.226	0	116.99	501500000	129	1.67459	0.0945354	0.281381	3.68264	WP_029058034.1	WP_029058034.1	611
22.2892	22.3589	21.967	24.6054	24.9315	22.2772						4	4	4	23.2	23.2	23.2	23.031	0	13.049	60539000	12	0.961	0.257483	-1.73299	-2.05237	WP_029058035.1	WP_029058035.1	612
27.2645	27.1766	27.5491	27.5185	27.4174	27.4532						13	13	13	53.2	53.2	53.2	32.106	0	113.89	762680000	115	0.499356	0.499389	-0.132905	-1.14328	WP_029058038.1	WP_029058038.1	613
28.1842	28.2918	28.2789	28.7243	28.5965	28.683				+	LFQ intensity 2AEP_LFQ intensity NH3	9	9	9	55	55	55	31.88	0	158.25	1580900000	104	2.92209	0.0153757	-0.416286	-8.21539	WP_029058039.1	WP_029058039.1	614
28.33	28.3148	28.729	28.7149	28.865	29.0047						27	27	27	68.3	68.3	68.3	26.604	0	163.65	1748900000	219	1.19051	0.18367	-0.403599	-2.53254	WP_029058040.1	WP_029058040.1	615
24.8776	23.5271	24.2257	25.5014	25.5824	26.232						10	10	10	75.4	75.4	75.4	20.866	0	72.349	204390000	50	1.58225	0.105996	-1.56184	-3.44528	WP_029058042.1	WP_029058042.1	616
26.2717	26.2506	25.6382	28.0709	27.975	27.7351				+	LFQ intensity 2AEP_LFQ intensity NH3	22	22	22	57.5	57.5	57.5	44.706	0	85.89	848280000	125	2.90434	0.0158352	-1.87349	-8.12776	WP_029058045.1	WP_029058045.1	617
23.1354	22.3299	22.8295	23.6426	23.3111	23.5107						5	5	5	27.8	27.8	27.8	32.475	0	11.792	53349000	22	1.3334	0.153047	-0.7232	-2.84972	WP_029058046.1	WP_029058046.1	618
21.1086	23.2277	23.8544	21.5736	20.9298	22.0842						3	3	3	23.4	23.4	23.4	15.264	0	10.058	9506100	11	0.600516	0.436719	1.20105	1.34139	WP_029058052.1	WP_029058052.1	619
27.4024	27.2712	27.3374	21.9196	22.0353	22.5413				+	LFQ intensity 2AEP_LFQ intensity NH3	15	15	15	41.1	41.1	41.1	60.456	0	149.3	204330000	71	4.92388	0.00166522	5.17161	26.5758	WP_029058053.1	WP_029058053.1	620
24.9356	24.314	25.345	23.8095	24.1266	24.5844						7	7	7	42.6	42.6	42.6	22.03	0	16.95	87148000	33	0.857654	0.294986	0.691363	1.84503	WP_029058054.1	WP_029058054.1	621
28.8209	29.0341	28.6168	29.4631	29.1759	29.2121						35	35	35	50.9	50.9	50.9	71.157	0	323.31	2508600000	297	1.4216	0.134014	-0.459753	-3.05403	WP_029058059.1	WP_029058059.1	624
27.098	27.1115	26.6568	26.8381	26.8603	26.6699						19	19	19	60.2	60.2	60.2	50.399	0	138.51	508820000	127	0.442633	0.537957	0.165967	1.03079	WP_029058062.1	WP_029058062.1	625
25.1872	23.8988	23.5426	23.5492	24.0932	24.1768						4	4	4	25.5	25.5	25.5	35.677	0	37.617	77205000	25	0.19267	0.763845	0.269794	0.502535	WP_029058065.1	WP_029058065.1	626
22.3427	21.481	22.2277	23.8472	22.1575	23.6717						2	2	2	20	20	20	19.207	0	10.67	27327000	10	0.941046	0.264747	-1.20834	-2.01199	WP_029058074.1	WP_029058074.1	630
26.0745	25.8513	25.4936	26.1576	26.3829	26.2433						16	16	16	31.9	31.9	31.9	65.833	0	67.295	329640000	83	1.17838	0.185819	-0.454804	-2.50633	WP_029058075.1	WP_029058075.1	631
22.9051	23.938	22.3049	23.7536	25.9715	22.5907						16	16	16	50.3	50.3	50.3	44.048	0	72.452	96951000	46	0.407139	0.561915	-1.05591	-0.959557	WP_029058076.1	WP_029058076.1	632
24.8312	23.9264	25.0154	25.1	25.1635	24.9767						14	14	14	54.7	54.7	54.7	33.374	0	64.065	147070000	68	0.648239	0.408628	-0.489064	-1.43436	WP_029058080.1	WP_029058080.1	634
26.0397	25.972	25.754	26.2297	26.1337	26.0613						11	11	11	36.8	36.8	36.8	41.831	0	61.241	279020000	65	1.04164	0.231917	-0.219636	-2.21756	WP_029058086.1	WP_029058086.1	636
22.4838	22.5966	22.8449	23.0837	21.7426	21.213						7	7	7	29.9	29.9	29.9	31.404	0	21.666	46310000	19	0.48205	0.512463	0.628688	1.10911	WP_029058089.1	WP_029058089.1	637
27.4398	27.4377	26.943	27.471	27.2258	27.4462						17	17	17	60.8	60.8	60.8	39.566	0	126.14	719170000	109	0.23076	0.720588	-0.107515	-0.588512	WP_029058090.1	WP_029058090.1	638
21.3138	24.0525	24.7151	25.6784	25.4015	25.1327						13	13	13	58.7	58.7	58.7	35.834	0	63.906	167290000	39	0.905762	0.277941	-2.04372	-1.94101	WP_029058093.1	WP_029058093.1	640
29.4748	29.8546	29.2042	29.6174	29.8698	29.534						61	61	61	58.8	58.8	58.8	99.636	0	323.31	3369000000	434	0.309914	0.64411	-0.162479	-0.759454	WP_029058105.1	WP_029058105.1	643
21.2234	22.1928	22.2549	22.584	22.1116	22.0602						6	6	6	11.7	11.7	11.7	64.424	0	75.777	20819000	19	0.411607	0.557717	-0.361534	-0.968568	WP_029058114.1	WP_029058114.1	644
25.1682	25.5627	24.7442	25.2752	24.7581	24.8392						12	12	12	35.1	35.1	35.1	56.28	0	55.28	136540000	60	0.283347	0.669295	0.200867	0.703069	WP_029058116.1	WP_029058116.1	645
22.0215	21.3449	22.3841	23.8972	24.1754	22.0448						3	3	3	10.8	10.8	10.8	45.061	0	37.171	45450000	12	0.925721	0.270385	-1.45561	-1.98109	WP_029058117.1	WP_029058117.1	646
26.9222	26.3851	26.8488	27.4959	27.3514	27.3156						18	18	18	64.7	64.7	64.7	32.913	0	131.63	655520000	101	1.71174	0.0890545	-0.668948	-3.78091	WP_029058120.1	WP_029058120.1	647
28.0816	27.8397	27.8452	27.9326	27.7791	27.7584						33	33	33	73.2	73.2	73.2	47.216	0	172.69	1011200000	215	0.437281	0.540978	0.0987765	1.0201	WP_029058127.1	WP_029058127.1	650
24.3853	24.2145	22.4509	24.2849	24.3092	24.65						7	7	7	29.5	29.5	29.5	37.291	0	12.443	84143000	30	0.508635	0.492495	-0.731125	-1.16156	WP_029058129.1	WP_029058129.1	651
26.5398	26.7371	25.5383	26.8389	26.7381	26.8948						20	20	20	83.2	83.2	83.2	36.177	0	102.53	450560000	125	0.67002	0.396901	-0.55221	-1.47678	WP_029058135.1	WP_029058135.1	655
25.2375	24.7171	25.7785	25.639	25.6343	25.8391						12	12	12	50.7	50.7	50.7	29.91	0	43.352	216200000	60	0.664208	0.398239	-0.459819	-1.46546	WP_029058137.1	WP_029058137.1	656
27.9558	27.9629	28.0272	28.1596	27.9076	28.192						20	20	20	61.2	61.2	61.2	42.893	0	247.41	1125200000	124	0.490918	0.507041	-0.104445	-1.12664	WP_029058138.1	WP_029058138.1	657
24.4062	24.2902	24.9012	24.5842	24.5171	24.6735						10	10	10	42	42	42	18.696	0	27.187	106460000	43	0.110917	0.867583	-0.0590515	-0.306367	WP_029058139.1	WP_029058139.1	658
28.244	28.1537	28.2188	27.9565	28.0181	27.7487						34	34	34	59.9	59.9	59.9	82.205	0	212.44	1152700000	211	1.59216	0.104359	0.297749	3.47031	WP_029058144.1	WP_029058144.1	659
22.3091	23.0348	24.1389	24.447	24.2357	24.2509						8	8	8	22.5	22.5	22.5	43.631	0	17.198	80111000	28	1.0063	0.242065	-1.15026	-2.14475	WP_029058145.1	WP_029058145.1	660
23.7531	23.5652	23.3377	23.6244	23.0359	23.3406						5	5	5	14.3	14.3	14.3	58.311	0	12.251	52267000	21	0.452032	0.529973	0.218383	1.04954	WP_029058158.1	WP_029058158.1	662
21.8652	22.1036	22.6495	24.1646	21.4521	24.102						4	4	4	25	25	25	35.013	0	11.678	58365000	17	0.487036	0.508737	-1.03344	-1.11897	WP_029058164.1	WP_029058164.1	663
25.1427	25.3235	25.5214	26.7356	27.2406	27.4658				+	LFQ intensity 2AEP_LFQ intensity NH3	11	11	11	57.2	57.2	57.2	23.432	0	72.529	491300000	100	2.77463	0.0195678	-1.8181	-7.51253	WP_029058167.1	WP_029058167.1	665
21.4367	21.6026	22.5048	21.3475	21.6419	21.5131						3	3	3	8.8	8.8	8.8	35.613	0	3.895	11170000	10	0.433928	0.541627	0.34721	1.01339	WP_029058170.1	WP_029058170.1	667
22.5823	21.4845	22.7285	22.2742	24.1319	21.8553						12	12	12	14.7	14.7	14.7	108.09	0	17.536	41097000	25	0.240105	0.713067	-0.488693	-0.609193	WP_029058174.1	WP_029058174.1	669
24.4361	24.5223	22.3764	24.4407	24.414	24.5886						7	7	7	35.6	35.6	35.6	25.73	0	18.62	94467000	36	0.42682	0.548064	-0.702885	-0.999151	WP_029058176.1	WP_029058176.1	670
26.5898	26.5766	26.7066	25.5501	25.4415	25.8261				+	LFQ intensity 2AEP_LFQ intensity NH3	14	14	14	38	38	38	36.25	0	53.31	231300000	94	2.95243	0.0152832	1.01843	8.36718	WP_029058182.1	WP_029058182.1	672
22.8431	21.894	22.6337	21.6343	21.6602	21.7418						7	7	7	16	16	16	54.511	0	26.904	13039000	19	1.26071	0.168512	0.778182	2.68637	WP_029058183.1	WP_029058183.1	673
26.7538	26.863	26.6155	26.1102	25.5059	25.8232						10	10	10	38.4	38.4	38.4	39.131	0	60.923	297320000	53	2.10547	0.0503994	0.931021	4.93515	WP_029058193.1	WP_029058193.1	677
24.4765	24.7716	24.7802	24.5789	23.9208	24.2422						11	11	11	29.2	29.2	29.2	49.384	0	30.796	83233000	65	0.934099	0.266954	0.428817	1.99797	WP_029058195.1	WP_029058195.1	679
23.9009	23.2676	23.8485	23.5588	23.4656	23.4118						10	10	10	34.4	34.4	34.4	40.676	0	69.2	51870000	43	0.394093	0.572562	0.193584	0.933172	WP_029058196.1	WP_029058196.1	680
23.7717	24.1996	22.0092	24.3495	24.5123	24.5678						8	8	8	26.4	26.4	26.4	29.038	0	42.047	95972000	43	0.787786	0.329557	-1.14969	-1.70701	WP_029058197.1	WP_029058197.1	681
24.9665	23.7452	24.9782	25.2277	24.7608	24.896						9	9	9	27.8	27.8	27.8	35.323	0	18.615	136290000	52	0.38853	0.577289	-0.398198	-0.921881	WP_029058198.1	WP_029058198.1	682
22.0408	22.6936	22.6343	23.7128	23.1195	21.6711						3	3	3	13.1	13.1	13.1	36.398	0	13.38	30412000	7	0.231381	0.720588	-0.378241	-0.589893	WP_029058200.1	WP_029058200.1	683
22.2649	22.0657	22.6901	23.2209	23.4847	23.1653						4	4	4	27.5	27.5	27.5	27.24	0	11.787	32924000	12	1.98199	0.0610124	-0.950055	-4.54927	WP_029058202.1	WP_029058202.1	684
22.7836	22.5647	23.0965	22.2802	22.4024	21.5297						2	2	2	10.2	10.2	10.2	21.44	0.000612	2.4846	11671000	7	1.11645	0.205472	0.744143	2.37407	WP_029058205.1	WP_029058205.1	687
21.9535	22.1986	22.5359	23.357	21.8482	22.3542						6	6	6	18.1	18.1	18.1	42.926	0	10.719	33478000	13	0.241503	0.711564	-0.290473	-0.612274	WP_029058207.1	WP_029058207.1	688
25.8759	25.4692	25.6565	26.2331	25.8297	26.0383						19	19	19	57.7	57.7	57.7	44.605	0	115.36	280650000	104	1.04033	0.232084	-0.366479	-2.21486	WP_029058209.1	WP_029058209.1	689
24.6136	24.3626	24.6454	24.5467	24.5372	24.3618						11	11	11	32.1	32.1	32.1	55.861	0	24.312	103480000	41	0.210911	0.743686	0.0586281	0.544065	WP_029058219.1	WP_029058219.1	692
24.3251	24.3028	22.646	24.2496	24.0875	23.8872						7	7	7	24	24	24	46.541	0	29.946	73022000	36	0.217954	0.734302	-0.316811	-0.559922	WP_029058221.1	WP_029058221.1	694
21.4242	20.816	22.2927	24.6945	24.9819	24.6298				+	LFQ intensity 2AEP_LFQ intensity NH3	11	11	11	25.8	25.8	25.8	60.541	0	42.534	79782000	33	2.74355	0.0199791	-3.25777	-7.37143	WP_029058227.1	WP_029058227.1	695
24.8157	21.9089	23.0512	24.4495	24.2653	24.5824						6	6	6	24.9	24.9	24.9	25.693	0	23.593	91159000	29	0.620408	0.425974	-1.17378	-1.38015	WP_029058238.1	WP_029058238.1	697
24.3138	24.5013	22.7059	23.8712	24.2948	24.0179						8	8	8	30.2	30.2	30.2	43.733	0	36.946	86333000	38	0.140271	0.835399	-0.22099	-0.378946	WP_029058251.1	WP_029058251.1	701
28.7057	29.1943	28.8247	29.2746	29.1276	29.1677						28	28	28	90.9	90.9	90.9	33.815	0	323.31	2458600000	307	0.853022	0.295454	-0.281771	-1.83584	WP_029058253.1	WP_029058253.1	702
23.5336	23.7179	23.4187	23.6233	23.9232	24.3288						9	9	9	28.7	28.7	28.7	30.195	0	8.8628	55438000	21	0.838868	0.30228	-0.401702	-1.80778	WP_029058260.1	WP_029058260.1	704
24.5757	23.9472	24.0308	23.6643	23.302	23.295						9	9	9	32.5	32.5	32.5	53.585	0	61.127	58082000	33	1.52277	0.115286	0.764121	3.29736	WP_029058264.1	WP_029058264.1	706
23.6366	22.6558	23.7551	21.6043	22.0411	21.9257						5	5	5	13.9	13.9	13.9	45.36	0	10.997	14176000	12	1.79604	0.0787731	1.49212	4.01018	WP_029058266.1	WP_029058266.1	707
26.8274	26.7734	26.7012	25.8463	25.6803	26.117				+	LFQ intensity 2AEP_LFQ intensity NH3	15	15	15	38.8	38.8	38.8	53.168	0	108.16	323440000	89	2.58627	0.0243569	0.886126	6.69268	WP_029058267.1	WP_029058267.1	708
28.7995	28.5201	28.8001	26.1206	25.8098	25.9135				+	LFQ intensity 2AEP_LFQ intensity NH3	18	18	18	52.3	52.3	52.3	35.936	0	263.98	677920000	144	4.52818	0.00235339	2.75859	21.1334	WP_029058273.1	WP_029058273.1	709
26.9392	27.2139	27.3105	27.6564	27.5008	27.578						14	14	14	61.7	61.7	61.7	38.801	0	82.709	742280000	83	1.61712	0.10137	-0.423873	-3.53378	WP_029058274.1	WP_029058274.1	710
21.874	21.3071	22.4014	22.0856	22.2472	21.731						6	3	3	9	5.6	5.6	74.137	0	21.699	10804000	7	0.173153	0.789888	-0.160432	-0.457297	WP_029058275.1	WP_029058275.1	711
23.3613	22.0087	23.5866	23.6311	23.1977	22.4169						5	5	5	30.1	30.1	30.1	33.785	0	15.832	49494000	17	0.0546881	0.927735	-0.0963326	-0.158583	WP_029058278.1	WP_029058278.1	712
25.608	25.241	25.8207	25.5015	25.0632	25.3584						11	11	11	19.6	19.6	19.6	64.5	0	54.129	178220000	69	0.512398	0.492252	0.248866	1.16897	WP_029058285.1	WP_029058285.1	714
22.08	21.7196	21.7617	22.18	21.6872	22.2378						4	4	4	13.8	13.8	13.8	44.437	0	20.338	12037000	11	0.362755	0.596176	-0.18123	-0.869257	WP_029058292.1	WP_029058292.1	715
26.9439	26.3568	23.7582	26.4361	26.9281	27.0976						18	18	18	60.1	60.1	60.1	39.015	0	70.7	432880000	87	0.495529	0.502393	-1.13431	-1.13574	WP_029058293.1	WP_029058293.1	716
23.0775	22.1116	22.7362	25.1145	25.3095	25.2939				+	LFQ intensity 2AEP_LFQ intensity NH3	7	7	7	47.5	47.5	47.5	20.337	0	19.508	115200000	28	3.0678	0.0134704	-2.59747	-8.96802	WP_029058295.1	WP_029058295.1	717
24.231	24.1887	24.2707	24.2282	24.1576	24.4015						5	5	5	39.9	39.9	39.9	17.519	0	42.738	88924000	30	0.158981	0.809277	-0.0323073	-0.423879	WP_029058296.1	WP_029058296.1	718
22.5217	21.9716	23.495	26.1966	25.1458	25.728				+	LFQ intensity 2AEP_LFQ intensity NH3	21	21	13	59	59	28.7	45.969	0	89.706	165100000	65	2.30578	0.0371085	-3.02737	-5.61451	WP_029058299.1	WP_029058299.1	720
23.1266	24.0891	21.9998	23.7302	21.8863	24.4156						2	2	2	16.1	16.1	16.1	18.625	0	3.2301	51687000	9	0.101129	0.878724	-0.272212	-0.281532	WP_029058302.1	WP_029058302.1	722
27.2741	27.0076	27.5447	26.9637	27.0736	27.2872						17	17	17	58.2	58.2	58.2	35.413	0	199.57	587940000	145	0.387775	0.577289	0.167343	0.920348	WP_029058315.1	WP_029058315.1	727
24.8471	24.0624	24.882	24.8495	24.5361	24.6686						11	11	11	38.2	38.2	38.2	45.245	0	54.525	119740000	41	0.112217	0.867558	-0.0874977	-0.309642	WP_029058322.1	WP_029058322.1	730
23.6007	21.5405	23.0236	23.871	23.0206	24.2665						3	3	3	13.8	13.8	13.8	42.741	0	15.413	50541000	13	0.628004	0.419255	-0.997748	-1.39495	WP_029058323.1	WP_029058323.1	731
23.9751	20.934	24.2635	24.331	24.5051	24.3962						7	7	7	48.3	48.3	48.3	22.957	0	36.754	82535000	34	0.563521	0.458614	-1.35325	-1.26918	WP_029058326.1	WP_029058326.1	732
22.5184	22.6194	22.7106	20.7059	22.4267	22.4227						3	3	3	12	12	12	37.055	0	13.199	22325000	17	0.593618	0.439691	0.76436	1.32794	WP_029058329.1	WP_029058329.1	733
22.0985	22.9265	24.8837	24.8743	25.2739	25.604						9	9	9	57.4	57.4	57.4	23.329	0	79.454	135100000	44	1.07431	0.219113	-1.94784	-2.2855	WP_029058330.1	WP_029058330.1	734
25.305	25.1171	24.7047	25.3196	25.0446	25.2435						7	7	7	18.7	18.7	18.7	50.152	0	29.877	161850000	26	0.339192	0.617479	-0.160283	-0.820643	WP_029058332.1	WP_029058332.1	736
23.3034	22.3229	22.8304	24.461	23.8106	24.1545						8	8	8	50	50	50	27.274	0	18.249	63596000	32	1.75382	0.0853123	-1.32314	-3.89424	WP_029058337.1	WP_029058337.1	737
26.7009	26.9154	26.0824	26.6125	26.3971	26.2544						14	14	14	53.4	53.4	53.4	49.165	0	62.272	384450000	58	0.207146	0.747735	0.144889	0.535549	WP_029058344.1	WP_029058344.1	739
25.4091	25.5753	25.6893	25.5887	25.3839	25.66						11	11	11	43.6	43.6	43.6	34.107	0	62.61	206560000	50	0.0402085	0.943647	0.0137196	0.118246	WP_029058352.1	WP_029058352.1	741
22.9805	24.6964	25.1826	25.3888	25.1894	25.156						8	8	8	49.2	49.2	49.2	31.207	0	31.492	132920000	34	0.64407	0.411232	-0.958234	-1.42624	WP_029058366.1	WP_029058366.1	743
22.7954	22.2495	23.7573	22.297	24.0469	23.9502						3	3	3	7.4	7.4	7.4	82.735	0	6.075	32161000	8	0.278072	0.674309	-0.497264	-0.691763	WP_029058367.1	WP_029058367.1	744
24.0263	24.2962	22.7729	24.2685	23.8532	22.6305						8	8	8	23.7	23.7	23.7	67.247	0	15.668	42319000	24	0.0582572	0.924932	0.114433	0.168366	WP_029058370.1	WP_029058370.1	745
24.7422	23.1104	23.9643	26.0098	26.2585	27.0935						15	15	15	48.2	48.2	48.2	34.201	0	86.159	290630000	70	1.92589	0.065972	-2.51497	-4.38152	WP_029058407.1	WP_029058407.1	750
24.3033	22.1335	24.5807	25.1132	25.1925	25.6065						6	6	6	37.7	37.7	37.7	24.958	0	65.326	138760000	23	0.969166	0.255374	-1.6316	-2.06895	WP_029058408.1	WP_029058408.1	751
21.0232	22.5878	21.8828	24.0385	23.7483	24.0894						5	5	5	28.1	28.1	28.1	28.45	0	24.457	55148000	21	1.99146	0.0600104	-2.12748	-4.57804	WP_029058418.1	WP_029058418.1	757
21.4591	22.8001	22.6054	22.124	22.9903	23.4521						5	5	5	29.8	29.8	29.8	25.301	0	27.686	33586000	14	0.423638	0.549877	-0.567301	-0.992766	WP_029058419.1	WP_029058419.1	758
28.473	28.6675	28.4335	28.585	28.4336	28.6597						19	19	19	58.4	58.4	58.4	40.842	0	123.74	1536600000	153	0.130151	0.840634	-0.0347996	-0.354227	WP_029058422.1	WP_029058422.1	759
26.7316	26.9805	26.5731	26.1106	26.5423	26.7883						6	6	6	80	80	80	7.6585	0	25.561	441560000	51	0.537627	0.474822	0.281318	1.2185	WP_029058427.1	WP_029058427.1	761
35.1488	34.9978	30.0132	32.3299	33.4464	32.1358						27	27	27	55.7	55.7	55.7	41.931	0	323.31	58260000000	445	0.162234	0.804915	0.749242	0.431593	WP_029058438.1	WP_029058438.1	763
24.8634	25.2772	24.7512	25.5666	25.0876	25.2831						8	8	8	34.3	34.3	34.3	39.379	0	51.898	158840000	32	0.755789	0.346606	-0.348455	-1.64423	WP_029058439.1	WP_029058439.1	764
26.0437	26.0197	26.1419	26.2077	25.7759	26.1885						14	14	14	54.9	54.9	54.9	40.766	0	119.67	301740000	92	0.0254724	0.965947	0.0110817	0.0760453	WP_029058445.1	WP_029058445.1	765
21.6054	23.7485	22.817	24.8357	24.5634	24.3244						17	17	17	47.2	47.2	47.2	60.977	0	40.613	74846000	43	1.35631	0.148436	-1.85086	-2.90213	WP_029058449.1	WP_029058449.1	768
22.885	21.8129	23.1984	26.1566	26.5072	26.8287				+	LFQ intensity 2AEP_LFQ intensity NH3	10	10	10	50.4	50.4	50.4	29.691	0	44.17	271150000	37	2.95157	0.0152832	-3.86539	-8.36287	WP_029058452.1	WP_029058452.1	769
26.3948	26.1565	26.4614	26.3323	26.1673	26.2667						10	10	10	43.7	43.7	43.7	35.351	0	112.24	339710000	93	0.323392	0.631326	0.0821158	0.787738	WP_029058453.1	WP_029058453.1	770
23.2547	22.6211	22.5805	23.3386	22.8764	21.9619						7	7	7	20.8	20.8	20.8	51.192	0	56.57	28590000	24	0.0708988	0.912605	0.0930945	0.202541	WP_029058456.1	WP_029058456.1	771
24.9099	24.151	24.9243	24.9579	25.0375	25.0838						6	6	6	30.3	30.3	30.3	22.579	0	19.135	157650000	34	0.637541	0.413441	-0.364702	-1.41352	WP_029058461.1	WP_029058461.1	776
27.4471	27.3935	27.9802	27.6841	27.6061	27.6844						15	15	15	71.4	71.4	71.4	25.05	0	270.44	808850000	117	0.0971324	0.88247	-0.0512937	-0.271294	WP_029058462.1	WP_029058462.1	777
25.1354	24.9943	25.2664	24.8786	24.5957	24.5914						5	5	5	15.2	15.2	15.2	43.012	0	22.547	115970000	32	1.64151	0.0974151	0.44343	3.59651	WP_029058467.1	WP_029058467.1	778
28.5115	28.4731	28.4594	27.7515	27.47	27.7439				+	LFQ intensity 2AEP_LFQ intensity NH3	16	16	16	65.3	65.3	65.3	40.683	0	101.09	1038800000	140	3.0357	0.013948	0.826186	8.79697	WP_029058468.1	WP_029058468.1	779
24.0118	23.3097	23.6269	21.2388	22.0134	22.1429				+	LFQ intensity 2AEP_LFQ intensity NH3	9	9	9	26.5	26.5	26.5	50.728	0	25.571	45641000	27	2.22255	0.0427821	1.85108	5.32379	WP_029058472.1	WP_029058472.1	781
29.5229	30.2312	24.5387	30.0249	31.4313	31.6751						33	33	33	84	84	84	38.093	0	323.31	7804400000	357	0.723436	0.363773	-2.94618	-1.58095	WP_029058475.1	WP_029058475.1	782
24.8454	24.7522	24.9741	25.1763	25.1929	25.3041						9	9	9	40.6	40.6	40.6	33.49	0	69.459	153460000	60	2.07709	0.0520091	-0.367236	-4.84436	WP_029058476.1	WP_029058476.1	783
29.8048	29.6608	30.3679	29.406	29.9495	30.1449						26	26	26	83.6	83.6	83.6	18.781	0	323.31	4548700000	402	0.132263	0.840256	0.111019	0.359412	WP_029058479.1	WP_029058479.1	784
24.5747	22.1442	22.5767	24.8122	24.5955	24.6095						5	5	5	20.4	20.4	20.4	44.008	0	7.7974	93371000	18	0.981138	0.251643	-1.57383	-2.09332	WP_029058486.1	WP_029058486.1	786
23.2908	22.9131	23.4635	23.4483	23.393	23.4342						8	8	8	27.6	27.6	27.6	39.881	0	29.481	48432000	29	0.548922	0.470057	-0.202689	-1.24063	WP_029058487.1	WP_029058487.1	787
25.7201	25.7464	25.4492	25.6687	25.6607	25.3096						16	16	16	30.9	30.9	30.9	76.567	0	47.961	216100000	76	0.239371	0.713481	0.0922133	0.607574	WP_029058488.1	WP_029058488.1	788
24.784	25.1744	25.3174	24.8741	25.039	24.811						14	14	14	22.7	22.7	22.7	96.067	0	29.41	120440000	44	0.457895	0.528045	0.183905	1.06121	WP_029058497.1	WP_029058497.1	789
27.4917	27.4521	27.9112	28.1523	28.1493	28.3899						18	18	18	80.7	80.7	80.7	29.145	0	230.11	1173400000	139	1.66727	0.0950716	-0.612152	-3.66347	WP_029058498.1	WP_029058498.1	790
25.4968	25.7196	25.1942	25.476	25.4284	25.0318						9	9	9	32.3	32.3	32.3	40.751	0	75.226	196120000	59	0.311443	0.643581	0.158162	0.762673	WP_029058500.1	WP_029058500.1	791
23.028	22.8401	22.1189	22.7115	22.2961	22.6916						6	6	6	14	14	14	51.49	0	9.3269	20574000	23	0.112889	0.867294	0.095993	0.31133	WP_029058504.1	WP_029058504.1	792
25.2606	24.66	25.1214	24.6025	24.6066	24.8498						12	12	12	33.9	33.9	33.9	50.407	0	35.041	134180000	56	0.756824	0.346393	0.327724	1.64626	WP_029058506.1	WP_029058506.1	793
27.2367	27.2239	26.7846	26.8202	26.7686	26.7584						26	26	26	66.6	66.6	66.6	56.068	0	165.69	544310000	134	0.933869	0.266954	0.299328	1.99751	WP_029058511.1	WP_029058511.1	794
23.6742	23.2119	24.1325	24.0285	23.974	24.175						6	6	6	35.4	35.4	35.4	32.114	0	10.246	64897000	19	0.639815	0.413327	-0.386298	-1.41795	WP_029058512.1	WP_029058512.1	795
25.5911	25.6286	22.2818	26.4863	26.4076	26.3464						8	8	8	36.2	36.2	36.2	40.869	0	22.898	323040000	42	0.795968	0.326357	-1.91292	-1.72311	WP_029058515.1	WP_029058515.1	796
24.1051	23.754	23.0286	21.8058	21.4964	22.8255						10	10	10	20.1	20.1	20.1	74.568	0	24.245	30749000	31	1.44181	0.131595	1.58667	3.10182	WP_029058520.1	WP_029058520.1	798
24.0196	21.8308	21.882	24.07	24.1805	24.2194						5	5	5	23.8	23.8	23.8	27.996	0	12.039	70333000	18	1.02603	0.239272	-1.57914	-2.18533	WP_029058527.1	WP_029058527.1	800
22.0459	23.4895	23.3054	22.0994	21.586	22.4628						5	5	5	12.9	12.9	12.9	55.842	0	17.723	18078000	10	0.79733	0.32593	0.897521	1.72579	WP_029058528.1	WP_029058528.1	801
25.3709	24.9917	25.2239	24.403	24.2148	24.1906				+	LFQ intensity 2AEP_LFQ intensity NH3	7	7	7	32.8	32.8	32.8	36.473	0	32.748	100190000	43	2.69756	0.0207711	0.926038	7.16698	WP_029058540.1	WP_029058540.1	802
23.6743	22.8831	23.4114	23.2457	23.4107	23.4952						6	6	6	18.2	18.2	18.2	50.526	0	43.433	50190000	28	0.0887742	0.889514	-0.0609048	-0.249687	WP_029058544.1	WP_029058544.1	804
24.2639	23.553	23.8897	24.4191	24.2577	24.6285						5	5	5	81.2	81.2	81.2	7.3831	0	138.3	86545000	26	1.08131	0.216108	-0.532914	-2.30015	WP_029058547.1	WP_029058547.1	805
23.3127	22.9338	22.6291	22.8028	23.0385	22.9518						3	3	3	6.3	6.3	6.3	20.356	0	5.7636	33522000	15	0.0448112	0.937351	0.0274665	0.131184	WP_029058550.1	WP_029058550.1	807
25.6102	25.9091	25.8603	25.9168	26.1048	26.1849						8	8	8	59.8	59.8	59.8	24.105	0	61.814	269880000	48	1.06176	0.223454	-0.275635	-2.25934	WP_029058551.1	WP_029058551.1	808
26.7528	26.5204	26.9055	26.9442	26.6444	26.7482						10	10	10	36.5	36.5	36.5	45.232	0	110.74	442160000	95	0.136742	0.836814	-0.0527204	-0.37036	WP_029058552.1	WP_029058552.1	809
24.6046	23.8556	23.6635	24.0004	23.8063	23.6742						8	8	8	19.5	19.5	19.5	52.81	0	23.541	75102000	37	0.286001	0.669295	0.214267	0.708741	WP_029058553.1	WP_029058553.1	810
23.135	23.0628	23.1037	22.4569	21.5506	21.9487						4	4	4	9.7	9.7	9.7	52.177	0	14.234	17714000	20	1.87678	0.0717286	1.1151	4.23838	WP_029058555.1	WP_029058555.1	812
27.2098	27.3572	27.1805	26.6931	26.5754	26.7321				+	LFQ intensity 2AEP_LFQ intensity NH3	11	11	11	47.5	47.5	47.5	37.739	0	65.301	473980000	62	2.89285	0.0158998	0.582313	8.07148	WP_029058556.1	WP_029058556.1	813
26.1512	25.8663	26.4063	27.1215	26.8497	27.3743						10	10	10	61.7	61.7	61.7	14.388	0	46.68	521030000	88	1.95882	0.0627142	-0.973914	-4.47944	WP_029058559.1	WP_029058559.1	814
23.4764	22.9902	23.1683	22.9588	20.4137	22.9584						5	5	5	10.8	10.8	10.8	53.404	0	8.3238	28229000	16	0.569294	0.455631	1.10132	1.28046	WP_029058561.1	WP_029058561.1	815
23.5502	21.797	22.9348	23.3026	22.3292	23.1318						5	5	5	18.4	18.4	18.4	41.858	0	9.8781	39389000	19	0.0966029	0.882675	-0.16055	-0.269933	WP_029058562.1	WP_029058562.1	816
25.9371	25.7641	25.8235	26.4405	26.2046	26.2863				+	LFQ intensity 2AEP_LFQ intensity NH3	14	14	14	48.2	48.2	48.2	36.211	0	63.107	334640000	69	2.26353	0.0398305	-0.468878	-5.46538	WP_029058570.1	WP_029058570.1	821
22.0123	23.1821	23.0037	22.8166	22.7217	22.6364						8	8	8	27.8	27.8	27.8	51.141	0	39.439	21889000	19	0.00699196	0.992015	0.00782776	0.0212962	WP_029058574.1	WP_029058574.1	823
24.971	24.6489	25.5871	25.4774	25.2562	25.1857						9	9	9	44.8	44.8	44.8	34.227	0	40.713	168860000	46	0.339709	0.617479	-0.237424	-0.821716	WP_029058575.1	WP_029058575.1	824
24.7045	24.7123	24.5234	24.4993	24.3594	24.3863						11	11	11	27.1	27.1	27.1	56.744	0	37.732	105720000	53	1.43426	0.132302	0.231745	3.08392	WP_029058577.1	WP_029058577.1	825
23.8361	23.4916	24.2667	24.0152	24.0109	24.1019						8	8	8	35.8	35.8	35.8	24.802	0	21.204	63843000	36	0.322785	0.631458	-0.177884	-0.786468	WP_029058581.1	WP_029058581.1	827
21.9074	21.9304	22.0925	22.4719	22.7162	22.5091				+	LFQ intensity 2AEP_LFQ intensity NH3	10	3	3	25.1	4.7	4.7	56.885	0	84.788	17686000	12	2.45082	0.0299111	-0.589003	-6.15211	WP_029058582.1	WP_029058582.1	828
23.2034	23.889	22.2288	23.943	24.5712	23.7767						15	15	15	25.3	25.3	25.3	94.973	0	83.105	72845000	39	0.853319	0.295454	-0.989874	-1.83643	WP_029058585.1	WP_029058585.1	829
24.1283	23.8829	22.3713	24.198	22.1386	23.8						9	9	9	38.7	38.7	38.7	38.996	0	25.417	49617000	38	0.0330956	0.956572	0.0819912	0.0980279	WP_029058588.1	WP_029058588.1	830
25.8296	25.5386	25.6272	25.6949	25.7027	25.2033						14	14	14	22.3	22.3	22.3	83.002	0	78.993	203610000	55	0.284647	0.669295	0.131484	0.705848	WP_029058589.1	WP_029058589.1	831
25.4561	25.27	25.5605	25.398	24.9673	25.0056						14	14	14	45.4	45.4	45.4	44.343	0	36.406	156170000	59	0.878849	0.286075	0.305227	1.88721	WP_029058590.1	WP_029058590.1	832
22.2035	23.6398	23.7036	24.0533	23.8646	24.2557						8	8	8	46.9	46.9	46.9	27.967	0	38.358	60721000	28	0.805656	0.320914	-0.875573	-1.74218	WP_029058591.1	WP_029058591.1	833
21.3955	21.5098	22.4318	22.3096	22.8191	22.5277						3	3	3	26.3	26.3	26.3	13.054	0	4.0214	18514000	10	1.00845	0.242065	-0.77309	-2.14918	WP_029058593.1	WP_029058593.1	834
22.7212	23.1281	23.1489	21.9614	22.9591	23.122						3	3	3	15.1	15.1	15.1	30.195	0	64.962	27950000	15	0.338742	0.617479	0.318541	0.819708	WP_029058596.1	WP_029058596.1	835
23.5343	23.8519	23.7925	24.2271	24.0175	24.4583						13	13	13	34.1	34.1	34.1	42.675	0	17.254	74978000	39	1.46981	0.127607	-0.508058	-3.16873	WP_029058603.1	WP_029058603.1	836
27.4362	27.8545	27.5656	27.3709	27.96	27.4211						36	36	36	49.2	49.2	49.2	104	0	315.05	840620000	173	0.0530639	0.929027	0.0347468	0.154111	WP_029058604.1	WP_029058604.1	837
23.0813	21.3785	22.8653	22.4536	23.0803	23.3307						3	3	3	16.9	16.9	16.9	19.918	0	8.9924	31006000	17	0.35917	0.599949	-0.513199	-0.861894	WP_029058610.1	WP_029058610.1	839
24.1282	23.8263	22.4126	23.9996	23.899	23.8291						6	6	6	19.1	19.1	19.1	38.43	0	74.875	64590000	28	0.355346	0.601981	-0.453564	-0.854027	WP_029058611.1	WP_029058611.1	840
22.3391	21.7005	22.4211	24.6247	21.079	24.7786						7	7	7	39.5	39.5	39.5	37.004	0	22.369	67543000	12	0.472487	0.520255	-1.34052	-1.09017	WP_029058621.1	WP_029058621.1	842
27.7308	28.0295	27.4286	28.524	28.2916	28.2927						29	29	29	65.6	65.6	65.6	61.024	0	314.36	1323600000	209	1.55166	0.110194	-0.639765	-3.36875	WP_029058626.1	WP_029058626.1	843
26.1216	25.9335	25.6221	26.2138	25.9602	25.9756						15	15	15	58.4	58.4	58.4	41.848	0	125.64	300990000	106	0.398258	0.568541	-0.157443	-0.941607	WP_029058629.1	WP_029058629.1	844
25.0476	25.1632	25.2181	25.3131	25.1919	25.1499						12	12	12	32.8	32.8	32.8	57.724	0	50.019	157820000	73	0.464542	0.525275	-0.0753479	-1.07441	WP_029058635.1	WP_029058635.1	845
24.7766	24.2349	24.787	24.4094	24.5206	24.8319						10	10	10	46	46	46	36.534	0	34.288	100820000	47	0.018326	0.976143	0.0122318	0.0551271	WP_029058645.1	WP_029058645.1	848
26.6542	26.6363	26.3335	26.8578	26.9866	26.6244						11	11	11	41.9	41.9	41.9	29.11	0	97.906	479760000	78	0.883164	0.285124	-0.281595	-1.89582	WP_029058649.1	WP_029058649.1	849
25.2466	25.1787	25.8079	25.9786	26.2103	26.1979						7	7	7	32.3	32.3	32.3	27.26	0	81.48	259810000	60	1.55144	0.110194	-0.71784	-3.36819	WP_029058652.1	WP_029058652.1	851
23.2443	22.8908	22.1945	23.0557	22.6542	21.9335						4	4	4	14.3	14.3	14.3	30.835	0	9.1358	16783000	13	0.195	0.761499	0.228748	0.507878	WP_029058657.1	WP_029058657.1	852
25.901	25.8987	25.9913	26.0821	26.2152	25.8652						13	13	13	59.6	59.6	59.6	34.265	0	131.24	266540000	70	0.509542	0.492495	-0.123845	-1.16335	WP_029058659.1	WP_029058659.1	853
25.8943	25.3164	25.9226	25.3071	25.545	25.6296						7	7	7	74	74	74	10.914	0	21.25	193190000	39	0.421321	0.550734	0.21725	0.988113	WP_029058661.1	WP_029058661.1	854
22.6602	23.366	23.9315	23.7303	23.6203	23.6015						4	4	4	18.1	18.1	18.1	30.886	0	13.611	46726000	23	0.375878	0.586463	-0.331487	-0.896118	WP_029058663.1	WP_029058663.1	855
22.6332	22.1232	23.4201	23.1859	23.5179	23.6685						5	5	5	31.7	31.7	31.7	21.716	0	29.453	36267000	18	0.842586	0.300263	-0.731911	-1.81514	WP_029058667.1	WP_029058667.1	856
25.9018	26.0046	25.9654	25.8919	26.1884	25.8779						23	23	23	24.6	24.6	24.6	115.85	0	71.237	269500000	95	0.0976052	0.88247	-0.0287774	-0.272508	WP_029058670.1	WP_029058670.1	857
28.29	28.5113	28.353	28.0992	28.4717	28.2571						51	51	51	48.5	48.5	48.5	126.23	0	295.2	1428200000	345	0.358187	0.600571	0.108727	0.859874	WP_029058671.1	WP_029058671.1	858
22.5396	22.466	22.5063	22.7852	22.9512	22.3808						6	6	6	15.9	15.9	15.9	40.187	0	9.9209	20821000	11	0.518978	0.487646	-0.201785	-1.1819	WP_029058691.1	WP_029058691.1	860
26.7833	26.0223	26.4624	25.8278	26.0979	26.6164						9	9	9	47.9	47.9	47.9	13.468	0	44.225	342060000	60	0.30873	0.644573	0.241975	0.756961	WP_029058692.1	WP_029058692.1	861
24.5772	24.3844	24.6969	24.5459	24.7469	24.4601						11	11	11	46.1	46.1	46.1	37.286	0	24.017	107860000	48	0.0900624	0.889514	-0.03151	-0.253034	WP_029058696.1	WP_029058696.1	863
25.7699	25.6462	25.5959	25.472	25.4348	25.2497						10	10	10	25.6	25.6	25.6	66.832	0	57.473	185750000	44	1.53014	0.114524	0.285208	3.3155	WP_029058703.1	WP_029058703.1	864
25.379	21.8631	24.9545	24.8017	24.9829	24.9967						7	7	7	17.1	17.1	17.1	54.843	0	65.63	128850000	39	0.317953	0.636392	-0.861593	-0.776348	WP_029058707.1	WP_029058707.1	865
26.2111	26.4052	25.8909	26.0852	25.7528	26.0443						12	12	12	46.2	46.2	46.2	27.543	0	73.258	282500000	64	0.497245	0.501116	0.208303	1.13912	WP_029058715.1	WP_029058715.1	868
22.5091	22.8625	22.9795	22.5751	21.2941	21.9244						4	4	4	22.2	22.2	22.2	16.649	0	8.6423	27615000	20	1.01045	0.242065	0.852469	2.15327	WP_029058716.1	WP_029058716.1	869
27.1419	27.2676	26.4011	27.2181	26.8162	26.8994						19	19	19	32.6	32.6	32.6	84.427	0	133.05	574900000	126	0.0473446	0.936069	-0.0410322	-0.138259	WP_029058717.1;AAP75601.1	WP_029058717.1	870
25.2796	25.3528	25.4081	25.7673	25.7508	26.0186				+	LFQ intensity 2AEP_LFQ intensity NH3	15	15	15	80.8	80.8	80.8	27.208	0	95.732	235330000	58	2.21206	0.0427821	-0.498671	-5.28801	WP_029058718.1	WP_029058718.1	871
30.0117	30.1435	29.7807	29.5145	29.7652	29.5104						58	58	58	82.8	82.8	82.8	76.124	0	323.31	3604000000	593	1.32035	0.155882	0.381914	2.82008	WP_029058723.1	WP_029058723.1	872
27.9031	27.6559	28.2248	27.7197	27.714	28.04						17	17	17	71.8	71.8	71.8	17.803	0	163.57	949900000	118	0.202626	0.753933	0.103371	0.525289	WP_029058724.1	WP_029058724.1	873
29.8436	30.0384	29.7412	29.3135	30.0785	29.4447						91	91	91	62.9	62.9	62.9	154.98	0	323.31	3570000000	686	0.447921	0.532678	0.262169	1.04134	WP_029058726.1	WP_029058726.1	874
29.883	30.1022	29.8474	29.3535	30.2109	29.3574						90	90	90	70.4	70.4	70.4	154.06	0	323.31	3827300000	565	0.439893	0.539922	0.30359	1.02532	WP_029058727.1	WP_029058727.1	875
26.3336	26.4766	26.5391	25.5497	26.0957	25.9808						7	7	7	54.4	54.4	54.4	12.926	0	168.2	276350000	71	1.50161	0.120218	0.574414	3.24562	WP_029058728.1	WP_029058728.1	876
26.7938	26.2547	27.0089	26.5491	26.4055	26.8276						9	9	9	59.3	59.3	59.3	18.113	0	87.544	436660000	84	0.131631	0.840256	0.0917123	0.357863	WP_029058729.1	WP_029058729.1	877
27.0138	26.8253	27.1692	27.0844	27.1078	27.1591						18	18	18	67.1	67.1	67.1	24.179	0	105.16	576020000	112	0.488762	0.507427	-0.11432	-1.12238	WP_029058730.1	WP_029058730.1	878
25.4475	25.2866	25.8591	25.6983	25.7663	25.8106						7	7	7	58	58	58	15.277	0	85.897	222970000	55	0.584397	0.445057	-0.227374	-1.30995	WP_029058731.1	WP_029058731.1	879
26.996	26.7008	27.164	27.1971	27.2311	27.3388						12	12	12	82.4	82.4	82.4	19.96	0	99.534	610510000	86	0.997995	0.244457	-0.302074	-2.12774	WP_029058732.1	WP_029058732.1	880
22.0067	22.9884	22.5226	21.9237	21.7587	22.0462						3	3	3	15.9	15.9	15.9	31.313	0	57.853	11651000	12	0.944128	0.264343	0.596374	2.01821	WP_029058742.1	WP_029058742.1	884
25.693	25.2805	25.2107	25.6535	25.3765	24.6409						19	19	19	32.8	32.8	32.8	73.673	0	51.762	186910000	69	0.19457	0.761499	0.171089	0.506893	WP_029058747.1	WP_029058747.1	885
22.2487	23.2655	23.7674	23.8927	23.7697	23.9985						5	5	5	40.5	40.5	40.5	23.457	0	8.5718	44496000	18	0.812813	0.317072	-0.793133	-1.75629	WP_029058751.1	WP_029058751.1	887
24.2919	22.5691	23.8272	24.7122	24.6391	25.208						7	7	7	47.6	47.6	47.6	15.489	0	36.867	118720000	26	1.11398	0.205472	-1.29041	-2.36885	WP_029058753.1	WP_029058753.1	889
22.8598	21.7091	23.3074	22.9811	23.6932	23.084						2	2	2	16.4	16.4	16.4	18.62	0	6.2583	25957000	9	0.525181	0.482817	-0.627316	-1.19409	WP_029058757.1	WP_029058757.1	891
22.6274	21.9994	23.1602	23.113	22.8965	23.0235						9	9	9	38.9	38.9	38.9	30.287	0	26.597	29143000	26	0.536855	0.474822	-0.415344	-1.21699	WP_029058761.1	WP_029058761.1	892
21.3759	21.3801	23.7107	23.4534	23.3917	23.1144						6	6	6	32.9	32.9	32.9	27.361	0	20.994	33715000	19	0.673741	0.394957	-1.16426	-1.48403	WP_029058764.1	WP_029058764.1	893
25.5007	25.1938	25.6619	21.7846	21.273	21.9289				+	LFQ intensity 2AEP_LFQ intensity NH3	12	12	12	56.2	56.2	56.2	25.654	0	21.685	54186000	34	4.01457	0.00415815	3.78993	15.6768	WP_029058770.1	WP_029058770.1	896
21.5137	21.416	23.7464	25.3009	25.3188	25.4765						4	4	4	27.4	27.4	27.4	30.305	0	58.909	129870000	21	1.83345	0.0763042	-3.14004	-4.11485	WP_029058773.1	WP_029058773.1	898
24.5789	24.2961	24.0984	23.5644	24.3188	24.1902						8	8	8	44.6	44.6	44.6	32.734	0	34.176	71816000	31	0.479855	0.514345	0.299999	1.10477	WP_029058779.1	WP_029058779.1	900
24.3076	24.0307	24.5975	24.6908	24.0022	24.364						8	8	8	25.4	25.4	25.4	34.815	0	119.69	82898000	37	0.0540764	0.927735	-0.0404072	-0.1569	WP_029058783.1	WP_029058783.1	901
26.8743	26.8169	26.8075	26.5179	26.2588	26.2821				+	LFQ intensity 2AEP_LFQ intensity NH3	21	21	21	55.4	55.4	55.4	49.067	0	120.73	368110000	131	2.30808	0.0371085	0.479951	5.62273	WP_029058799.1	WP_029058799.1	906
23.1409	23.2568	22.0465	23.9584	23.6001	23.9877						6	6	6	34.4	34.4	34.4	26.616	0	12.529	52558000	23	1.19937	0.18254	-1.03399	-2.55176	WP_029058803.1	WP_029058803.1	909
23.9577	24.1552	24.3546	24.2954	24.9056	24.4549						9	9	9	41.9	41.9	41.9	30.414	0	37.027	98985000	34	0.853393	0.295454	-0.396133	-1.83657	WP_029058805.1	WP_029058805.1	911
22.641	21.8196	22.291	21.8211	22.3835	22.785						2	2	2	41.8	41.8	41.8	8.2494	0	4.7572	13727000	10	0.0760092	0.906562	-0.0793508	-0.216156	WP_029058806.1	WP_029058806.1	912
26.0747	26.2851	26.1577	25.8317	25.8646	25.7473				+	LFQ intensity 2AEP_LFQ intensity NH3	16	16	16	32.1	32.1	32.1	77.293	0	79.158	259660000	82	2.14986	0.0463004	0.357932	5.0798	WP_029058810.1	WP_029058810.1	915
28.6465	28.3656	28.9274	28.2464	28.4215	28.5587						25	25	25	74.6	74.6	74.6	23.549	0	176.46	1547100000	185	0.56897	0.455631	0.2376	1.27983	WP_029058818.1	WP_029058818.1	917
30.2092	30.1886	29.7038	30.3036	30.0813	30.0501						45	45	45	87.4	87.4	87.4	45.346	0	323.31	4937200000	307	0.238622	0.713923	-0.11113	-0.60592	WP_029058823.1	WP_029058823.1	919
27.5858	27.5714	27.4895	27.3409	27.5144	27.3789						41	41	41	49.4	49.4	49.4	95.989	0	323.31	787670000	235	1.06692	0.222352	0.13752	2.27009	WP_029058828.1	WP_029058828.1	921
26.7586	26.945	26.745	26.3723	26.2882	25.9805						17	17	17	52.5	52.5	52.5	38.387	0	235.77	361950000	88	1.94846	0.0635797	0.602542	4.44846	WP_029058829.1	WP_029058829.1	922
23.8804	21.3591	23.0737	25.2523	25.0258	25.102						9	9	9	49.2	49.2	49.2	33.041	0	37.891	115730000	34	1.46458	0.128091	-2.35567	-3.15617	WP_029058830.1	WP_029058830.1	923
23.4706	23.6523	23.5126	24.1212	24.159	22.3322						7	7	7	33.7	33.7	33.7	34.303	0	22.553	71696000	27	0.0041685	0.994004	0.00770887	0.012737	WP_029058832.1	WP_029058832.1	924
24.1088	23.3527	22.6062	23.5923	24.3049	23.9332						13	13	13	29.4	29.4	29.4	53.795	0	21.664	68251000	39	0.540311	0.473361	-0.587564	-1.22376	WP_029058833.1	WP_029058833.1	925
26.2462	26.4253	25.8928	25.7632	26.3277	25.8853						19	19	18	35.8	35.8	34.7	91.776	0	138.61	229330000	82	0.350692	0.605094	0.19602	0.844435	WP_029058840.1	WP_029058840.1	927
21.9864	21.0887	22.2824	24.1351	24.3368	24.1588				+	LFQ intensity 2AEP_LFQ intensity NH3	6	6	6	63.8	63.8	63.8	16.343	0	36.546	65883000	20	2.57619	0.0246461	-2.42437	-6.6511	WP_029058857.1	WP_029058857.1	928
24.816	25.2033	25.1731	27.1336	26.684	27.1988				+	LFQ intensity 2AEP_LFQ intensity NH3	9	9	9	35.8	35.8	35.8	46.879	0	116.54	423940000	47	3.16641	0.0115475	-1.94138	-9.51276	WP_029058865.1	WP_029058865.1	929
24.1039	22.8845	22.8581	24.393	23.7963	22.7274						3	3	3	17.8	17.8	17.8	32.237	0	14.789	64411000	14	0.217836	0.734302	-0.356701	-0.559657	WP_029058870.1	WP_029058870.1	931
27.0279	27.6572	27.0447	26.7554	28.7447	26.9703						75	75	75	53.3	53.3	53.3	198.72	0	323.31	881050000	286	0.137456	0.836814	-0.246873	-0.372102	WP_029058889.1;REV__WP_051242338.1	WP_029058889.1	933
22.597	22.9497	22.6466	24.4838	24.5079	24.201				+	LFQ intensity 2AEP_LFQ intensity NH3	4	4	4	27.5	27.5	27.5	21.532	0	41.577	64715000	16	3.45225	0.00822155	-1.66646	-11.2716	WP_029058892.1	WP_029058892.1	934
25.251	25.2715	25.1439	25.2492	25.1741	25.262						13	13	13	32.2	32.2	32.2	57.686	0	32.502	170750000	58	0.0446456	0.937351	-0.00629361	-0.13072	WP_029058893.1	WP_029058893.1	935
25.6514	25.6295	25.3964	25.6923	25.4388	25.488						10	10	10	33.2	33.2	33.2	35.754	0	37.559	204430000	44	0.0597435	0.923519	0.0194194	0.172422	WP_029058896.1	WP_029058896.1	936
21.957	22.7473	22.0414	23.5065	23.2664	23.5226						5	5	5	18.7	18.7	18.7	34.364	0	9.2778	35503000	24	1.9603	0.0627142	-1.18331	-4.48387	WP_029058897.1	WP_029058897.1	937
21.4588	21.9263	23.1827	24.789	24.8945	21.9725						6	6	6	29.1	29.1	29.1	33.6	0	23.525	87766000	20	0.713199	0.36916	-1.69605	-1.56097	WP_029058899.1	WP_029058899.1	938
23.7051	23.5708	24.3437	23.8175	23.8435	23.674						5	5	5	23.6	23.6	23.6	26.922	0	15.768	56152000	32	0.144269	0.831049	0.0948976	0.38863	WP_029058902.1	WP_029058902.1	939
25.3334	25.6842	25.459	25.0316	25.1525	25.0019						17	17	17	32.3	32.3	32.3	81.178	0	141.75	150540000	69	1.72785	0.0873003	0.430169	3.82406	WP_029058907.1	WP_029058907.1	940
23.985	22.3886	21.8392	24.1455	21.5051	23.7427						9	9	9	25.3	25.3	25.3	61.333	0	31.16	69038000	39	0.139516	0.835899	-0.393481	-0.377113	WP_029058909.1	WP_029058909.1	942
24.8419	24.7337	24.3493	24.9039	24.6601	24.8288						9	9	9	21.1	21.1	21.1	61.154	0	38.068	123540000	54	0.397509	0.568798	-0.155994	-0.940092	WP_029058910.1	WP_029058910.1	943
28.5968	28.6644	28.9573	29.3126	28.9494	29.0793						21	21	21	81.4	81.4	81.4	35.184	0	323.31	2092600000	203	1.14737	0.194691	-0.374271	-2.43979	WP_029058912.1	WP_029058912.1	944
25.7759	25.7938	24.6033	25.3579	26.0011	25.7003						5	5	5	15.9	15.9	15.9	37.852	0	36.6	227240000	61	0.271851	0.68092	-0.295437	-0.678382	WP_029058913.1	WP_029058913.1	945
26.6942	26.5473	27.1907	27.7378	27.7888	27.6135						18	18	18	81.3	81.3	81.3	28.89	0	96.599	819970000	80	1.95902	0.0627142	-0.902639	-4.48005	WP_029058914.1	WP_029058914.1	946
22.4611	22.5583	22.5669	23.4169	22.1297	23.4385						6	6	6	22.9	22.9	22.9	33.376	0	13.026	32090000	14	0.464475	0.525275	-0.466271	-1.07428	WP_029058915.1	WP_029058915.1	947
28.6755	28.4729	28.4377	28.6506	28.574	28.5932						32	32	32	69.8	69.8	69.8	54.885	0	217.35	1695300000	266	0.424987	0.549279	-0.0772254	-0.995474	WP_029058916.1	WP_029058916.1	948
25.7554	25.9387	25.9432	26.0152	26.0425	25.9215						18	18	18	34.7	34.7	34.7	63.6	0	113.67	273590000	96	0.725556	0.362625	-0.113986	-1.5851	WP_029058917.1	WP_029058917.1	949
24.4886	22.345	22.8089	24.7624	25.4136	24.9894						10	10	10	59.2	59.2	59.2	21.59	0	51.148	125860000	34	1.27281	0.165244	-1.841	-2.71326	WP_029058918.1	WP_029058918.1	950
21.8365	22.0197	22.9941	21.7652	22.3495	22.5132						5	5	5	10	10	10	58.845	0	9.5298	14117000	15	0.0604988	0.923036	0.074145	0.174479	WP_051242606.1;WP_029058921.1;CON__Q3ZBD7	WP_051242606.1;WP_029058921.1	951
24.723	22.153	25.9691	24.9443	24.9885	22.359						2	2	2	64	64	64	8.4006	0	30.303	119330000	16	0.0443239	0.937351	0.18441	0.129819	WP_029058923.1	WP_029058923.1	953
27.2279	27.7648	26.8187	28.6701	27.8284	27.4984						14	14	14	57.6	57.6	57.6	38.722	0	99.618	1145300000	109	0.754864	0.346733	-0.728477	-1.64242	WP_029058924.1	WP_029058924.1	954
22.9463	22.7476	23.1941	22.4264	22.7132	22.9256						5	5	5	31.7	31.7	31.7	32.424	0	21.885	29101000	20	0.637923	0.413441	0.274234	1.41427	WP_029058928.1	WP_029058928.1	955
27.8609	27.7283	28.0217	27.5181	27.4003	27.3916						18	18	18	47.8	47.8	47.8	36.787	0	157.2	774260000	110	2.00096	0.059023	0.433669	4.60703	WP_029058935.1	WP_029058935.1	958
27.3946	27.5841	26.7984	27.9701	27.8029	27.6508						11	11	11	61.1	61.1	61.1	39.699	0	126.84	902290000	77	1.01387	0.242065	-0.548877	-2.1603	WP_029058937.1	WP_029058937.1	959
21.8647	23.2559	22.8433	23.8508	23.7005	23.7617						4	4	4	31.2	31.2	31.2	14.968	0	13.405	40505000	17	1.26292	0.168119	-1.11641	-2.69127	WP_029058938.1	WP_029058938.1	960
27.4611	27.6929	27.3087	27.9928	27.7715	27.7378						20	20	20	54.1	54.1	54.1	42.145	0	161.66	961760000	138	1.18545	0.184201	-0.346448	-2.52161	WP_029058941.1	WP_029058941.1	963
22.2759	24.1266	24.5524	24.5434	24.8384	24.5839						13	13	13	55.9	55.9	55.9	31.44	0	39.195	104410000	39	0.642846	0.411725	-1.00359	-1.42386	WP_029058944.1	WP_029058944.1	964
23.0105	23.3277	23.2147	25.5616	25.5598	25.3765				+	LFQ intensity 2AEP_LFQ intensity NH3	16	16	16	42.1	42.1	42.1	56.069	0	58.903	154090000	61	4.50066	0.00235339	-2.31496	-20.7987	WP_029058947.1	WP_029058947.1	965
26.0478	26.075	26.5145	26.5497	26.5082	26.6202						10	10	10	62.1	62.1	62.1	20.984	0	92.77	416160000	91	1.05356	0.22719	-0.346905	-2.2423	WP_029058948.1	WP_029058948.1	966
25.3766	25.7554	25.4799	26.1135	26.0111	25.9768						14	14	14	33.3	33.3	33.3	63.936	0	156.28	274090000	81	1.83789	0.0758813	-0.496495	-4.12739	WP_029058949.1	WP_029058949.1	967
22.1125	21.793	23.1201	23.3019	23.1401	21.2694						5	5	5	23.2	23.2	23.2	34.737	0	7.8815	27343000	12	0.107911	0.870288	-0.228577	-0.298776	WP_029058950.1	WP_029058950.1	968
25.8076	25.651	24.5407	25.6397	25.8969	25.7045						22	22	22	51.5	51.5	51.5	64.211	0	128.83	237670000	89	0.43674	0.540978	-0.413919	-1.01902	WP_029058964.1	WP_029058964.1	974
22.0935	22.2455	23.3741	22.2467	23.4175	22.8925						10	10	10	18.5	18.5	18.5	90.356	0	11.835	23687000	19	0.206238	0.748494	-0.28119	-0.533491	WP_029058967.1	WP_029058967.1	976
21.9584	20.8284	22.3219	22.0578	21.9347	22.0549						4	4	4	4.7	4.7	4.7	79.015	0	25.549	13683000	15	0.27865	0.674183	-0.31289	-0.693004	WP_029058968.1	WP_029058968.1	977
25.3895	25.7706	22.6273	25.1432	25.0703	24.9763						10	10	10	36.2	36.2	36.2	59.905	0	76.935	155840000	40	0.179214	0.782233	-0.467454	-0.471441	WP_029058969.1	WP_029058969.1	978
24.4952	24.1404	24.352	25.0217	24.8625	24.5942						12	12	12	51.5	51.5	51.5	30.403	0	32.611	119820000	59	1.42882	0.132926	-0.496941	-3.07105	WP_029058970.1	WP_029058970.1	979
26.3283	26.0124	26.1861	26.2256	25.9964	25.9876						13	13	13	22.9	22.9	22.9	50.439	0	112.86	287890000	100	0.368345	0.593277	0.105748	0.880718	WP_029058977.1	WP_029058977.1	983
22.9858	22.3681	22.3586	23.1584	23.0096	22.8835						10	10	10	35	35	35	37.119	0	59.183	29447000	25	0.939452	0.265001	-0.446339	-2.00877	WP_029058982.1	WP_029058982.1	984
25.2843	25.3793	25.948	25.1056	24.9756	25.5779						10	10	10	40.4	40.4	40.4	35.005	0	61.591	172140000	37	0.501968	0.497799	0.317485	1.14843	WP_029058992.1	WP_029058992.1	988
22.333	24.0437	24.1108	23.9336	24.3745	23.9081						17	17	17	18.8	18.8	18.8	129.01	0	40.115	67372000	54	0.406676	0.561915	-0.576248	-0.958625	WP_029058995.1	WP_029058995.1	989
22.333	24.6622	24.7254	24.6205	24.4497	24.7348						9	9	9	32.4	32.4	32.4	43.059	0	51.282	98519000	43	0.366957	0.593277	-0.694815	-0.877874	WP_029059001.1	WP_029059001.1	991
23.951	23.9139	24.0889	24.0026	24.5228	23.8656						6	6	6	6.6	6.6	6.6	135.69	0	46.388	83488000	26	0.283598	0.669295	-0.145735	-0.703606	WP_029059003.1	WP_029059003.1	992
26.7247	26.666	26.8332	26.6106	26.414	26.4965						14	14	14	29	29	29	61.534	0	94.637	375960000	92	1.4483	0.130827	0.234228	3.11727	WP_029059012.1	WP_029059012.1	996
26.4742	26.3869	27.1457	26.9451	26.746	26.9754						12	12	12	60.7	60.7	60.7	25.691	0	62.338	493520000	77	0.367344	0.593277	-0.219905	-0.878668	WP_029059020.1	WP_029059020.1	997
24.0948	23.8379	24.6363	24.2605	24.3374	24.3044						6	6	6	25.1	25.1	25.1	32.304	0	14.966	80631000	32	0.178617	0.782287	-0.111107	-0.470051	WP_029059023.1	WP_029059023.1	999
21.6838	21.9446	22.7947	22.2501	22.8552	22.4403						2	2	2	19.9	19.9	19.9	14.949	0	3.5154	12006000	12	0.419636	0.551047	-0.3742	-0.984727	WP_029059027.1	WP_029059027.1	1000
27.5281	27.5726	27.5338	27.3572	27.3963	27.2219						33	33	33	47.8	47.8	47.8	76.333	0	136.32	711720000	173	1.79938	0.0787731	0.219727	4.01945	WP_029059032.1	WP_029059032.1	1001
24.1879	24.2803	24.2201	24.2255	24.0832	24.1999						11	11	11	28.8	28.8	28.8	42.722	0	63.346	76319000	50	0.509438	0.492495	0.0599022	1.16314	WP_029059034.1	WP_029059034.1	1002
27.8472	27.9756	27.9092	27.4679	28.0564	27.6501						48	48	48	49.9	49.9	49.9	119.38	0	241.72	934610000	226	0.449964	0.531789	0.185911	1.04542	WP_029059037.1	WP_029059037.1	1003
22.0034	22.6823	23.8656	24.051	24.1371	24.5176						6	6	6	38.2	38.2	38.2	17.122	0	28.884	71187000	20	1.15732	0.193264	-1.38479	-2.46106	WP_029059038.1	WP_029059038.1	1004
23.6819	23.877	24.2168	24.9017	24.8789	24.6094						6	6	6	30.5	30.5	30.5	34.146	0	37.647	98697000	31	2.05654	0.0542286	-0.871443	-4.7794	WP_029059041.1	WP_029059041.1	1006
27.9906	27.9574	27.8064	28.2813	28.054	28.0721						20	20	20	51.1	51.1	51.1	42.746	0	125.99	1203000000	141	1.10832	0.205476	-0.217669	-2.3569	WP_029059046.1	WP_029059046.1	1009
25.3952	25.1498	24.9149	25.9229	26.2768	26.4342				+	LFQ intensity 2AEP_LFQ intensity NH3	12	12	12	68.4	68.4	68.4	23.765	0	89.594	266480000	60	2.1734	0.0444907	-1.05801	-5.15781	WP_029059059.1	WP_029059059.1	1012
23.6008	22.3626	23.5525	23.7004	23.6162	23.3222						5	5	5	20.1	20.1	20.1	31.668	0	27.174	43804000	18	0.372578	0.589668	-0.374275	-0.889378	WP_029059060.1	WP_029059060.1	1013
25.1242	24.8937	22.4309	21.6365	24.6153	23.6008						5	5	5	29.1	29.1	29.1	23.911	0	22.985	82953000	29	0.284191	0.669295	0.865419	0.704874	WP_029059069.1	WP_029059069.1	1015
23.0375	22.8417	23.1821	23.6477	23.6662	23.6264				+	LFQ intensity 2AEP_LFQ intensity NH3	9	9	9	40.3	40.3	40.3	33.596	0	15.768	48417000	28	2.49109	0.0279751	-0.626361	-6.30878	WP_029059079.1	WP_029059079.1	1016
22.1856	22.4099	22.1839	21.6129	21.2946	21.1311				+	LFQ intensity 2AEP_LFQ intensity NH3	9	9	9	38.8	38.8	38.8	26.76	0	13.023	7830600	17	2.33104	0.0359781	0.913595	5.70521	WP_029059081.1	WP_029059081.1	1018
23.0855	22.7946	23.6169	23.2432	23.0324	23.2208						5	5	5	17.5	17.5	17.5	24.315	0	9.7623	32074000	19	0.000266961	0.999385	0.000204722	0.00081935	WP_029059084.1	WP_029059084.1	1019
22.1446	23.615	23.4577	22.3539	22.374	22.7807						3	3	3	11.8	11.8	11.8	27.814	0	8.1955	20296000	14	0.513386	0.491839	0.56956	1.17091	WP_029059085.1	WP_029059085.1	1020
22.233	22.269	21.5104	21.9568	22.4132	21.6872						5	5	5	17.9	17.9	17.9	42.263	0	21.32	15161000	14	0.0151727	0.981241	-0.0149059	-0.0457976	WP_029059090.1	WP_029059090.1	1023
26.974	26.9972	27.3713	27.0752	27.1776	27.2524						12	12	12	41.3	41.3	41.3	33.34	0	193.8	582360000	129	0.145399	0.830648	-0.0542412	-0.391357	WP_029059092.1	WP_029059092.1	1024
21.3527	23.3033	22.5606	22.465	21.9474	22.1201						4	4	4	19.8	19.8	19.8	28.403	0	4.6166	10390000	12	0.143838	0.831049	0.22806	0.387588	WP_029059096.1	WP_029059096.1	1025
27.4823	27.522	27.8335	28.1317	27.978	28.125						16	16	16	61	61	61	36.313	0	100.13	1119900000	149	1.72721	0.0873003	-0.465661	-3.82234	WP_029059097.1	WP_029059097.1	1026
26.6978	26.5555	26.756	26.5416	26.4649	26.9158						8	8	8	45	45	45	22.122	0	52.225	409350000	90	0.0666413	0.917665	0.0289497	0.191112	WP_029059100.1	WP_029059100.1	1027
26.1391	26.0652	26.0736	25.6913	25.6273	25.9179						13	13	13	36.9	36.9	36.9	39.212	0	78.25	250280000	79	1.7214	0.0881097	0.347108	3.80674	WP_029059102.1	WP_029059102.1	1028
25.4352	25.7333	25.9829	25.7285	25.4571	25.5085						9	9	9	33.5	33.5	33.5	39.22	0	35.816	226300000	56	0.354516	0.601981	0.152439	0.852318	WP_029059103.1	WP_029059103.1	1029
25.0655	23.4091	25.232	25.0431	24.972	25.2801						8	8	8	64.2	64.2	64.2	17.704	0	48.306	137880000	30	0.377092	0.586463	-0.529516	-0.898597	WP_029059105.1	WP_029059105.1	1030
24.2567	21.4075	24.5976	24.7848	24.6158	25.1815						10	10	10	72.5	72.5	72.5	19.446	0	31.882	122520000	47	0.633045	0.416473	-1.44007	-1.40477	WP_029059106.1	WP_029059106.1	1031
21.6257	22.233	23.4594	22.439	22.0664	22.155						3	3	3	14	14	14	31.455	0	3.2673	13202000	9	0.148122	0.826313	0.219212	0.397918	WP_029059107.1	WP_029059107.1	1032
25.9493	26.4496	26.1109	27.163	27.0808	27.0962				+	LFQ intensity 2AEP_LFQ intensity NH3	9	9	9	47.1	47.1	47.1	30.664	0	42.576	531510000	56	2.49108	0.0279751	-0.943393	-6.30876	WP_029059108.1	WP_029059108.1	1033
27.0769	27.1914	26.0415	26.9627	27.6016	27.3589						5	5	5	10.9	10.9	10.9	47.304	0	127.05	633840000	55	0.584628	0.445057	-0.537776	-1.3104	WP_029059109.1	WP_029059109.1	1034
27.3917	27.6813	27.3653	28.2088	28.4312	28.3577				+	LFQ intensity 2AEP_LFQ intensity NH3	7	7	7	35.5	35.5	35.5	19.94	0	75.347	1159700000	84	2.67712	0.0213762	-0.853136	-7.07773	WP_029059110.1	WP_029059110.1	1035
25.4939	25.3224	25.848	25.6046	25.1963	25.4268						9	9	9	39.2	39.2	39.2	36.461	0	52.991	192880000	40	0.304289	0.648913	0.145576	0.74759	WP_029059124.1	WP_029059124.1	1037
22.1761	21.5915	22.1578	23.329	21.6919	23.2372						4	4	4	16.8	16.8	16.8	48.91	0	18.622	19244000	13	0.618812	0.426863	-0.777571	-1.37704	WP_029059137.1	WP_029059137.1	1043
21.9648	21.8076	22.4999	25.089	25.0495	25.1005				+	LFQ intensity 2AEP_LFQ intensity NH3	8	8	8	46.9	46.9	46.9	27.336	0	81.11	96539000	23	3.84828	0.00471357	-2.98888	-14.2254	WP_029059151.1	WP_029059151.1	1045
25.0052	25.5045	22.5331	25.3495	25.7253	24.9293						15	15	15	15.5	15.5	15.5	131.61	0	110.24	163240000	69	0.448459	0.532678	-0.987123	-1.04242	WP_029059153.1	WP_029059153.1	1046
27.2328	27.4994	26.9457	27.6289	27.995	27.6603						25	25	25	44.1	44.1	44.1	86.511	0	155.69	858150000	130	1.26756	0.166792	-0.53543	-2.70158	WP_029059156.1	WP_029059156.1	1048
24.1308	23.5081	24.9576	25.3965	25.0024	25.4728						10	10	10	39.1	39.1	39.1	32.04	0	28.108	152890000	60	1.15521	0.193336	-1.0917	-2.45655	WP_029059162.1	WP_029059162.1	1052
22.7651	22.5751	23.1637	21.395	23.1457	21.6782						6	6	6	29.8	29.8	29.8	29.581	0	18.602	29291000	17	0.598391	0.436719	0.761705	1.33724	WP_029059164.1	WP_029059164.1	1053
26.6115	26.236	26.3555	26.332	25.9785	26.2406						15	15	15	44.3	44.3	44.3	41.354	0	70.417	338460000	96	0.639756	0.413327	0.217285	1.41784	WP_029059167.1	WP_029059167.1	1054
22.5557	22.7922	22.7046	23.2925	23.3077	22.8087						3	3	3	25.8	25.8	25.8	25.617	0	19.773	33917000	21	1.19527	0.18367	-0.452132	-2.54287	WP_029059168.1	WP_029059168.1	1055
21.754	22.7978	22.6496	24.5868	26.043	25.7334				+	LFQ intensity 2AEP_LFQ intensity NH3	6	6	6	35.8	35.8	35.8	32.713	0	29.069	137790000	21	2.28844	0.0381089	-3.05393	-5.55289	WP_029059171.1	WP_029059171.1	1056
24.9624	24.5766	25.4259	23.8738	24.0914	24.0532						9	9	9	41.2	41.2	41.2	22.86	0	18.111	79619000	48	1.74095	0.0863826	0.982222	3.85935	WP_029059172.1	WP_029059172.1	1057
26.0815	26.0464	26.2973	25.1237	25.1708	25.0907				+	LFQ intensity 2AEP_LFQ intensity NH3	10	10	10	54.8	54.8	54.8	28.813	0	84.17	199170000	47	3.61234	0.0068241	1.01333	12.3869	WP_029059173.1	WP_029059173.1	1058
27.2083	27.1899	27.187	26.0226	26.0472	25.9788				+	LFQ intensity 2AEP_LFQ intensity NH3	19	19	19	62	62	62	40.892	0	81.481	396710000	139	6.21304	0.000342275	1.17885	55.9198	WP_029059175.1	WP_029059175.1	1059
24.1109	23.6481	24.5631	23.0775	23.4316	23.3628						4	4	4	37	37	37	14.06	0	12.281	47264000	26	1.33815	0.152288	0.816748	2.86054	WP_029059176.1	WP_029059176.1	1060
25.5245	25.3805	25.1259	26.4457	25.8926	25.944						14	14	14	37.8	37.8	37.8	45.707	0	55.979	284920000	70	1.62334	0.100809	-0.750492	-3.54972	WP_029059182.1	WP_029059182.1	1061
24.1114	22.2683	22.7835	24.4494	24.2206	21.2516						5	5	5	14.8	14.8	14.8	41.637	0	18.271	67964000	20	0.0761723	0.906562	-0.252787	-0.216588	WP_029059184.1	WP_029059184.1	1062
25.5399	24.5861	25.1016	20.7276	21.7746	22.937						10	10	10	30.8	30.8	30.8	53.413	0	16.685	56133000	21	2.02923	0.0568063	3.26282	4.69411	WP_029059189.1	WP_029059189.1	1064
25.5438	25.1354	24.626	24.663	24.7419	24.0243						14	14	14	39.3	39.3	39.3	49.285	0	40.96	123160000	45	0.829726	0.307563	0.62535	1.78969	WP_029059190.1	WP_029059190.1	1065
22.0893	23.4763	23.3872	21.4793	23.3633	21.7526						5	5	5	23.1	23.1	23.1	27.296	0	11.072	16591000	20	0.458859	0.528045	0.785826	1.06312	WP_029059207.1	WP_029059207.1	1067
27.2339	26.9535	27.0223	26.4994	25.7571	26.5159						9	9	9	31.3	31.3	31.3	47.626	0	323.31	418030000	49	1.43113	0.132788	0.812407	3.07651	WP_029059210.1	WP_029059210.1	1068
26.8132	26.5825	26.723	26.0632	25.9349	25.8702				+	LFQ intensity 2AEP_LFQ intensity NH3	8	8	8	24.9	24.9	24.9	54.855	0	48.638	340290000	48	2.98528	0.0148275	0.750125	8.53438	WP_029059215.1	WP_029059215.1	1070
28.435	28.6658	28.1644	28.3684	28.447	28.2425						33	33	33	54.3	54.3	54.3	81.09	0	323.31	1431300000	256	0.166166	0.799333	0.0690651	0.440884	WP_029059231.1	WP_029059231.1	1072
23.5226	23.5873	23.9082	23.4994	23.5918	23.481						5	5	5	56.5	56.5	56.5	12.129	0	45.972	44594000	23	0.527291	0.481174	0.148645	1.19823	WP_029059264.1	WP_029059264.1	1077
22.659	22.4431	22.4561	25.4103	25.2761	25.7809				+	LFQ intensity 2AEP_LFQ intensity NH3	13	13	13	44.1	44.1	44.1	31.146	0	140.39	129980000	36	4.23763	0.00332684	-2.9697	-17.8521	WP_029059300.1	WP_029059300.1	1079
22.578	23.0353	21.7978	23.4274	23.2224	23.2109						10	10	10	22.7	22.7	22.7	46.709	0	12.887	35730000	23	1.04215	0.231917	-0.816542	-2.21864	WP_029059316.1	WP_029059316.1	1081
27.1183	27.0102	26.8287	27.1839	27.1929	27.0319						22	22	22	51.1	51.1	51.1	73.282	0	122.35	607230000	154	0.689611	0.385279	-0.150489	-1.51496	WP_029059324.1	WP_029059324.1	1085
25.49	24.9694	25.4439	25.3602	25.2039	25.1896						15	15	15	30.9	30.9	30.9	74.972	0	37.218	174280000	58	0.102452	0.876921	0.049895	0.284909	WP_029059329.1	WP_029059329.1	1086
31.0501	31.0392	30.5754	22.0427	20.9871	22.1126				+	LFQ intensity 2AEP_LFQ intensity NH3	27	27	27	59	59	59	46.713	0	323.31	2470200000	157	4.68565	0.00192137	9.1741	23.1529	WP_029059350.1	WP_029059350.1	1091
23.9674	23.8928	24.1092	22.5402	22.2095	21.8149				+	LFQ intensity 2AEP_LFQ intensity NH3	8	8	8	42.3	42.3	42.3	27.183	0	11.46	19687000	21	2.92401	0.0153757	1.80157	8.22494	WP_029059352.1;WP_029059477.1	WP_029059352.1	1092
26.1508	25.6678	26.5489	22.2247	21.9927	22.7289				+	LFQ intensity 2AEP_LFQ intensity NH3	15	15	15	77.5	77.5	77.5	25.325	0	60.585	81084000	35	3.46684	0.00822155	3.80704	11.3692	WP_029059353.1	WP_029059353.1	1093
25.9906	25.8523	26.5993	25.4845	25.7448	25.648						6	6	6	52.2	52.2	52.2	18.524	0	71.431	235920000	47	1.01275	0.242065	0.521606	2.15801	WP_029059356.1	WP_029059356.1	1095
22.4658	23.9239	21.8892	23.0909	23.5838	21.5372						7	7	7	14.8	14.8	14.8	86.516	0	48.158	40835000	30	0.00849072	0.990384	0.0223128	0.0258179	WP_029059359.1	WP_029059359.1	1098
23.1792	22.1667	22.2681	22.7627	22.7874	22.0996						7	7	7	20.3	20.3	20.3	41.019	0	20.303	23667000	21	0.00995837	0.989725	-0.0118783	-0.0302312	WP_029059360.1	WP_029059360.1	1099
29.6376	29.7081	29.6818	29.5832	29.1897	29.4863						32	32	32	51.3	51.3	51.3	58.393	0	323.31	3100900000	313	0.999938	0.24414	0.256123	2.13172	WP_029059368.1	WP_029059368.1	1102
22.5938	22.5547	22.9261	24.702	24.5525	24.7417				+	LFQ intensity 2AEP_LFQ intensity NH3	4	4	4	22.3	22.3	22.3	25.663	0	36.242	76384000	25	3.94467	0.00436464	-1.97383	-15.05	WP_029059375.1	WP_029059375.1	1104
21.9252	21.6327	23.3781	22.7899	22.6501	22.7522						3	3	3	21.2	21.2	21.2	17.333	0	8.5799	20413000	12	0.316637	0.636681	-0.418748	-0.773588	WP_029059379.1	WP_029059379.1	1107
20.5884	22.4567	21.8024	25.0113	25.1379	24.8682				+	LFQ intensity 2AEP_LFQ intensity NH3	22	22	22	29.4	29.4	29.4	100.1	0	27.889	96805000	40	2.44551	0.0299111	-3.38996	-6.13169	WP_029059380.1	WP_029059380.1	1108
24.8943	22.742	21.8288	25.0057	25.1954	25.1432						2	2	2	14.5	14.5	14.5	22.725	0	31.475	130410000	16	1.01006	0.242065	-1.95972	-2.15247	WP_029059381.1	WP_029059381.1	1109
22.0503	21.6265	23.2658	23.6187	23.6931	23.6405						4	4	4	27	27	27	20.062	0	7.6045	45431000	19	1.27491	0.164901	-1.33658	-2.71796	WP_029059382.1	WP_029059382.1	1110
23.4641	23.5532	23.9788	23.9151	23.9245	23.9659						9	9	9	39.7	39.7	39.7	34.381	0	25.858	66458000	36	0.779309	0.333639	-0.269755	-1.69036	WP_029059386.1	WP_029059386.1	1114
26.8778	26.7908	26.7671	26.6779	26.4294	26.4738						17	17	17	47	47	47	46.054	0	78.286	415360000	82	1.56745	0.108489	0.284897	3.40814	WP_029059390.1	WP_029059390.1	1115
23.666	23.5765	22.8923	23.2687	23.4847	23.4972						9	9	9	20.6	20.6	20.6	61.739	0	19.902	43499000	49	0.0519757	0.929339	-0.0385844	-0.151107	WP_029059391.1	WP_029059391.1	1116
28.5166	28.3202	28.451	29.7094	29.4466	29.4452				+	LFQ intensity 2AEP_LFQ intensity NH3	36	36	36	68.6	68.6	68.6	55.705	0	323.31	2671100000	303	3.33371	0.0096014	-1.10452	-10.5081	WP_029059392.1	WP_029059392.1	1117
27.3103	27.4342	27.324	28.8364	28.8268	28.7809				+	LFQ intensity 2AEP_LFQ intensity NH3	25	25	25	70.3	70.3	70.3	41.923	0	156.26	1554700000	190	5.35501	0.000822774	-1.45853	-34.0933	WP_029059393.1	WP_029059393.1	1118
26.8471	26.9078	26.8201	27.166	27.2602	26.964						25	25	25	46.1	46.1	46.1	70.081	0	74.924	616560000	129	1.39057	0.140386	-0.271773	-2.98135	WP_029059396.1	WP_029059396.1	1121
25.5816	25.1884	25.6662	25.6797	25.511	25.5758						16	16	16	48.9	48.9	48.9	49.626	0	41.913	218010000	76	0.286342	0.669295	-0.110099	-0.709471	WP_029059399.1	WP_029059399.1	1122
21.7027	21.8875	23.4774	23.9244	23.955	24.2907						5	5	5	21.7	21.7	21.7	26.953	0	20.509	50922000	16	1.37965	0.142641	-1.70083	-2.95598	WP_029059409.1	WP_029059409.1	1127
27.7436	27.9166	27.6141	27.7708	27.8418	27.7469						29	29	29	55	55	55	71.216	0	223.53	966180000	193	0.111448	0.867558	-0.0283496	-0.307705	WP_029059414.1	WP_029059414.1	1129
27.8877	28.0345	27.874	28.2256	28.0225	28.0565						18	18	18	59.7	59.7	59.7	35.577	0	150.97	1133500000	164	0.978339	0.251814	-0.169423	-2.08761	WP_029059415.1	WP_029059415.1	1130
27.3302	27.0098	27.0533	27.2428	26.8952	26.9982						16	16	16	57	57	57	41.194	0	148.11	618420000	139	0.234022	0.717687	0.0857124	0.595749	WP_029059416.1	WP_029059416.1	1131
27.5159	27.5848	27.7191	27.8881	27.568	27.6697						21	21	21	60.9	60.9	60.9	37.071	0	179.02	894710000	183	0.38396	0.579844	-0.101955	-0.91259	WP_029059417.1	WP_029059417.1	1132
24.0937	23.8541	23.2443	24.5165	24.6176	24.6219						4	4	4	22.5	22.5	22.5	21.333	0	10.335	87824000	21	1.54381	0.111756	-0.854667	-3.34925	WP_029059419.1	WP_029059419.1	1133
22.4368	21.9566	23.7373	23.7315	23.6493	24.0938						5	5	5	21.6	21.6	21.6	28.598	0	26.25	49533000	24	0.949838	0.262942	-1.11464	-2.02976	WP_029059420.1	WP_029059420.1	1134
24.0538	23.6145	23.8189	24.1069	23.9704	24.0439						3	3	3	9.6	9.6	9.6	36.2	0	5.3894	65737000	16	0.727858	0.361956	-0.211285	-1.58959	WP_029059421.1	WP_029059421.1	1135
23.9578	22.234	22.9104	24.1862	24.7789	24.4646						5	5	5	30.3	30.3	30.3	38.134	0	10.812	78766000	21	1.27683	0.164634	-1.44248	-2.72222	WP_029059422.1	WP_029059422.1	1136
25.1202	24.7673	25.6366	25.3149	25.6014	25.5377						10	10	10	42	42	42	34.698	0	62.767	192680000	70	0.508468	0.492495	-0.309969	-1.16123	WP_029059423.1	WP_029059423.1	1137
24.5511	24.702	24.8149	24.8536	24.8091	24.7978						5	5	5	21.7	21.7	21.7	27.471	0	19.38	119730000	33	0.769562	0.338177	-0.130835	-1.67123	WP_029059427.1	WP_029059427.1	1139
25.2426	25.2326	24.32	25.5287	25.3589	25.3427						14	14	14	32.3	32.3	32.3	68.673	0	54.148	175980000	73	0.699925	0.377855	-0.478376	-1.53507	WP_029059428.1	WP_029059428.1	1140
24.6353	21.5032	22.4561	24.2935	24.527	24.5447						7	7	7	16.5	16.5	16.5	59.49	0	13.823	87211000	28	0.788799	0.329385	-1.59021	-1.709	WP_029059430.1	WP_029059430.1	1141
26.1656	25.9563	26.1287	25.7254	25.5791	25.5287				+	LFQ intensity 2AEP_LFQ intensity NH3	14	14	14	45.5	45.5	45.5	39.156	0	119.44	219190000	63	2.24613	0.0411903	0.472488	5.40487	WP_029059434.1	WP_029059434.1	1143
22.7824	22.9563	23.6192	21.775	23.9768	24.1937						4	4	4	37.3	37.3	37.3	8.8804	0	6.2197	42523000	10	0.085336	0.893537	-0.195853	-0.24072	WP_029059436.1	WP_029059436.1	1144
24.5293	24.0252	24.7936	25.1327	25.0238	25.2072						7	7	7	39.8	39.8	39.8	28.977	0	35.605	139560000	47	1.35576	0.148436	-0.671836	-2.90087	WP_029059437.1	WP_029059437.1	1145
22.159	21.6605	23.0678	21.0565	21.0505	20.9857						3	3	3	7.1	7.1	7.1	58.278	0.0005872	1.8174	5943700	8	1.42652	0.132926	1.26488	3.06563	WP_029059439.1	WP_029059439.1	1146
23.9942	23.147	22.7825	24.1635	23.4738	24.5029						2	2	2	26.6	26.6	26.6	9.7264	0	6.9543	74969000	22	0.719603	0.364487	-0.738845	-1.57347	WP_029059443.1	WP_029059443.1	1147
29.6218	29.6282	29.5888	30.0716	29.7635	29.9153						37	37	37	97.1	97.1	97.1	39.678	0	323.31	3873900000	423	1.55803	0.109689	-0.303885	-3.38461	WP_029059444.1	WP_029059444.1	1148
24.7868	24.7407	23.0354	24.0159	22.7346	21.0371						2	2	2	7.6	7.6	7.6	16.315	0	35.578	88448000	8	0.699529	0.377855	1.59178	1.5343	WP_029059445.1	WP_029059445.1	1149
27.1368	27.7919	25.9146	26.8783	27.1281	26.5666						10	10	10	21.7	21.7	21.7	47.827	0	75.616	538450000	72	0.0541492	0.927735	0.0901108	0.157101	WP_029059446.1	WP_029059446.1	1150
27.7307	27.8422	27.6195	27.6415	27.3707	27.4487						26	26	26	65.1	65.1	65.1	50.956	0	156.76	791530000	173	1.11322	0.205472	0.243837	2.36725	WP_029059451.1	WP_029059451.1	1152
22.6966	22.0513	23.0224	24.5938	24.7383	24.6443				+	LFQ intensity 2AEP_LFQ intensity NH3	6	6	6	21.6	21.6	21.6	36.713	0	14.32	76139000	14	2.69866	0.0207711	-2.06871	-7.17182	WP_029059459.1	WP_029059459.1	1156
28.1548	28.3343	27.7968	27.2661	27.9526	27.1538						71	71	71	51.2	51.2	51.2	173	0	323.31	869490000	306	1.01311	0.242065	0.63781	2.15874	WP_029059460.1	WP_029059460.1	1157
27.7036	27.546	27.5095	27.1619	27.0085	27.0704				+	LFQ intensity 2AEP_LFQ intensity NH3	22	22	22	59.2	59.2	59.2	52.257	0	149.17	613230000	135	2.61271	0.0237024	0.506067	6.80279	WP_029059461.1	WP_029059461.1	1158
23.6231	21.4097	22.7162	24.7387	25.0043	24.8546						8	8	8	34	34	34	34.959	0	17.925	101890000	33	1.61501	0.10137	-2.28287	-3.52839	WP_029059465.1	WP_029059465.1	1160
21.994	21.9635	23.0899	23.5097	23.6247	23.6117						3	3	3	12.9	12.9	12.9	27.294	0	27.411	34523000	16	1.52865	0.114524	-1.23287	-3.31182	WP_029059466.1	WP_029059466.1	1161
26.921	26.92	27.0257	27.6267	27.4432	27.3656				+	LFQ intensity 2AEP_LFQ intensity NH3	16	16	16	74.7	74.7	74.7	36.25	0	141.18	689670000	98	2.45099	0.0299111	-0.522909	-6.15279	WP_029059469.1	WP_029059469.1	1162
22.5278	23.2438	23.2617	24.5246	24.7888	24.7371				+	LFQ intensity 2AEP_LFQ intensity NH3	9	9	9	28.2	28.2	28.2	41.212	0	27.076	85371000	34	2.5543	0.0253651	-1.67238	-6.56155	WP_029059470.1	WP_029059470.1	1163
23.9191	24.2137	23.6689	24.1294	23.6491	23.7278						10	10	10	33.7	33.7	33.7	47.905	0	36.787	64162000	37	0.172092	0.790988	0.0985006	0.454812	WP_029059474.1	WP_029059474.1	1165
21.6556	21.9508	22.3095	21.8962	21.6038	21.5692						6	6	6	15.3	15.3	15.3	70.36	0	19.571	21704000	13	0.583785	0.445057	0.282239	1.30875	WP_029059479.1	WP_029059479.1	1166
27.359	27.2585	26.7923	26.454	26.421	26.2603						23	23	23	22	22	22	95.686	0	125.05	463670000	101	1.83109	0.0763662	0.758182	4.10818	WP_029059482.1	WP_029059482.1	1168
31.7044	31.5816	31.4169	31.3279	30.9521	31.2957						24	24	24	57.1	57.1	57.1	39.888	0	292.76	10615000000	339	1.20718	0.181634	0.375738	2.56875	WP_029059484.1	WP_029059484.1	1169
23.3592	22.4999	22.331	21.3338	22.9142	22.7992						5	5	5	25	25	25	27.372	0	10.118	16530000	20	0.251754	0.701191	0.380936	0.634764	WP_029059485.1	WP_029059485.1	1170
22.0213	22.0897	22.2726	22.3648	22.3219	22.5825						4	4	4	15.9	15.9	15.9	33.652	0	12.869	16961000	13	1.25782	0.168786	-0.295216	-2.67997	WP_029059491.1	WP_029059491.1	1173
22.9281	22.1683	23.3694	22.4865	23.2568	23.1059						6	6	6	25.6	25.6	25.6	33.995	0	55.36	29457000	18	0.10937	0.869105	-0.127825	-0.302464	WP_029059493.1	WP_029059493.1	1174
24.4695	23.91	23.6703	24.0748	23.8384	24.1538						10	10	10	24.2	24.2	24.2	39.785	0	18.484	69245000	36	0.00732258	0.992015	-0.00568581	-0.022295	WP_029059494.1	WP_029059494.1	1175
25.1111	24.6312	25.3509	25.0008	25.1988	25.0578						10	10	10	36.6	36.6	36.6	34.322	0	57.162	150190000	71	0.0885652	0.889514	-0.0547199	-0.249143	WP_029059497.1	WP_029059497.1	1177
21.5529	21.9468	22.9818	23.9195	24.1138	24.0355						8	8	8	49	49	49	17.35	0	13.021	51882000	25	1.90931	0.0678635	-1.86242	-4.33283	WP_029059500.1	WP_029059500.1	1178
24.4928	24.1017	24.5596	23.6552	23.7285	23.5855						7	7	7	44	44	44	21.843	0	14.483	69752000	39	2.09408	0.0505756	0.72827	4.89857	WP_029059502.1	WP_029059502.1	1179
28.3305	28.359	27.856	27.4878	27.1835	27.179						28	28	28	71	71	71	51.171	0	140.24	916100000	177	2.02037	0.057663	0.898371	4.6667	WP_029059503.1	WP_029059503.1	1180
23.6428	23.918	23.6454	21.7658	22.1927	22.6322				+	LFQ intensity 2AEP_LFQ intensity NH3	6	6	6	27.3	27.3	27.3	28.879	0	19.355	24912000	23	2.3511	0.0353284	1.5385	5.77813	WP_029059506.1	WP_029059506.1	1181
28.3642	28.4692	28.5694	26.0402	25.7337	25.6614				+	LFQ intensity 2AEP_LFQ intensity NH3	12	12	12	41.2	41.2	41.2	36.052	0	64.856	523710000	90	4.46506	0.00239475	2.65583	20.3736	WP_029059507.1	WP_029059507.1	1182
24.0695	22.2024	22.87	23.5529	23.3464	23.3485						8	8	8	27.4	27.4	27.4	41.912	0	16.426	49093000	33	0.267807	0.684851	-0.368649	-0.669654	WP_029059512.1	WP_029059512.1	1184
31.0324	30.8428	30.8049	29.5769	29.3264	29.5169				+	LFQ intensity 2AEP_LFQ intensity NH3	34	34	34	53.9	53.9	53.9	58.83	0	271.55	4359600000	277	3.79125	0.00516566	1.41993	13.7583	WP_029059513.1	WP_029059513.1	1185
23.4035	23.0821	23.6282	22.9871	23.1532	23.1276						8	8	8	24.4	24.4	24.4	35.508	0	15.976	36815000	31	0.780007	0.333639	0.281979	1.69173	WP_029059516.1	WP_029059516.1	1187
23.4664	23.5316	23.6074	21.7698	22.1151	23.2571						7	7	7	20.8	20.8	20.8	51.318	0	6.0227	31908000	21	1.20238	0.181749	1.15447	2.55831	WP_029059526.1	WP_029059526.1	1193
25.9339	25.7727	25.7848	25.5683	25.4213	25.7024						15	15	15	32.4	32.4	32.4	67.65	0	71.792	230300000	77	1.29673	0.161766	0.266466	2.76678	WP_029059527.1	WP_029059527.1	1194
23.5362	21.3782	22.2901	23.0046	23.5735	23.2703						4	4	4	11.8	11.8	11.8	52.239	0	5.3243	44388000	11	0.611469	0.432648	-0.88125	-1.36274	WP_029059566.1	WP_029059566.1	1197
23.3876	21.7699	23.6308	22.3281	22.9958	22.1911						3	3	3	11	11	11	41.105	0	13.021	13260000	5	0.267396	0.684851	0.424461	0.668764	WP_029059576.1	WP_029059576.1	1198
23.2982	22.6318	23.34	22.1313	22.1443	22.2548						4	4	4	12.4	12.4	12.4	45.056	0	25.64	21580000	22	1.76473	0.083558	0.913253	3.92398	WP_029059577.1	WP_029059577.1	1199
25.0227	21.5938	24.7211	23.7946	23.4076	22.5007						5	5	5	17.5	17.5	17.5	37.011	0	19.615	53434000	15	0.178267	0.782287	0.544926	0.469237	WP_029059578.1	WP_029059578.1	1200
24.1874	24.2919	24.5008	23.3485	21.5529	23.7248						8	8	8	23.6	23.6	23.6	47.119	0	25.079	44005000	30	1.00662	0.242065	1.45125	2.14541	WP_029059579.1	WP_029059579.1	1201
25.343	25.5547	24.9669	24.7487	24.5587	24.2994						10	10	10	26.8	26.8	26.8	48.155	0	31.118	117070000	42	1.59987	0.103657	0.752612	3.48985	WP_029059580.1	WP_029059580.1	1202
24.6008	24.4907	24.4201	21.6175	22.4569	21.991				+	LFQ intensity 2AEP_LFQ intensity NH3	12	12	12	28.8	28.8	28.8	57.844	0	32.553	27084000	27	3.24871	0.0106806	2.48206	9.99077	WP_029059587.1	WP_029059587.1	1204
22.8838	22.9603	23.4495	22.661	22.3118	21.8877						5	5	5	15.7	15.7	15.7	41.37	0	6.7195	7435900	10	1.33038	0.153218	0.811026	2.84285	WP_029059588.1	WP_029059588.1	1205
26.195	26.5536	24.6946	28.2288	28.152	28.0046						17	17	17	58	58	58	51.263	0	139.39	916370000	101	1.80573	0.0787689	-2.31408	-4.03713	WP_029059590.1	WP_029059590.1	1207
22.8488	23.0934	21.7172	26.3153	26.6106	26.6211				+	LFQ intensity 2AEP_LFQ intensity NH3	14	14	14	60.1	60.1	60.1	24.301	0	85.646	275340000	57	3.09169	0.0129395	-3.96252	-9.09726	WP_029059591.1	WP_029059591.1	1208
26.1021	26.6524	26.7028	27.4313	27.3681	27.2993						16	16	16	35	35	35	58.943	0	50.914	595190000	93	1.96205	0.0627142	-0.880473	-4.48912	WP_029059594.1	WP_029059594.1	1209
21.6401	22.6718	22.7985	25.1314	24.7593	24.7587				+	LFQ intensity 2AEP_LFQ intensity NH3	11	11	11	29.1	29.1	29.1	41.96	0	51.046	91930000	26	2.53636	0.0260121	-2.51302	-6.48894	WP_029059595.1	WP_029059595.1	1210
24.115	21.9968	22.5005	25.9349	25.3036	25.1868						8	8	8	35.3	35.3	35.3	34.717	0	146.95	151120000	38	1.73042	0.0873003	-2.60435	-3.83096	WP_029059597.1	WP_029059597.1	1211
22.3839	21.9481	22.6921	25.9078	25.8158	25.8875				+	LFQ intensity 2AEP_LFQ intensity NH3	10	10	10	36.3	36.3	36.3	37.447	0	27.066	173120000	35	4.07249	0.00396996	-3.52901	-16.2153	WP_029059598.1	WP_029059598.1	1212
21.4315	22.2357	22.6705	23.2575	21.7681	22.9624						4	4	4	30.2	30.2	30.2	26.602	0	21.623	24964000	24	0.399801	0.56797	-0.550103	-0.94473	WP_029059611.1	WP_029059611.1	1215
23.9369	23.492	24.1241	24.5016	24.5955	24.8142						7	7	7	41.7	41.7	41.7	14.562	0	12.384	98036000	37	1.70389	0.0900605	-0.786101	-3.76001	WP_029059624.1	WP_029059624.1	1217
23.6436	23.6463	22.7561	24.0254	23.7363	23.6781						11	11	11	24.8	24.8	24.8	66.523	0	68.731	58543000	36	0.668759	0.396901	-0.464632	-1.47432	WP_029059627.1	WP_029059627.1	1219
26.3332	26.1686	26.1062	25.7878	25.7045	25.9536						13	13	13	36.1	36.1	36.1	54.322	0	55.911	270260000	80	1.75065	0.0855663	0.387395	3.88564	WP_029059645.1	WP_029059645.1	1225
23.9862	23.8906	24.4817	22.6187	21.5122	22.8868						7	7	7	31.9	31.9	31.9	29.038	0	15.179	29065000	23	1.74857	0.0856081	1.78025	3.87999	WP_029059648.1	WP_029059648.1	1226
26.7617	26.4576	26.7556	26.6089	26.5722	26.6193						22	22	22	44.5	44.5	44.5	68.61	0	108.29	408720000	138	0.223915	0.728839	0.0581163	0.573267	WP_029059650.1	WP_029059650.1	1227
23.759	24.0663	24.1329	24.1838	24.0043	23.9292						5	5	5	23.8	23.8	23.8	34.913	0	23.8	70710000	25	0.142871	0.83204	-0.0530535	-0.38525	WP_029059651.1	WP_029059651.1	1228
25.8067	25.5754	25.5736	25.4726	25.5399	25.6186						14	14	14	38.3	38.3	38.3	47.88	0	55.766	217630000	80	0.542374	0.473361	0.108226	1.2278	WP_029059652.1	WP_029059652.1	1229
24.7786	25.0023	21.7701	24.884	26.626	24.8533						34	34	34	20.1	20.1	20.1	267.23	0	94.304	194530000	99	0.600721	0.436719	-1.60412	-1.34179	WP_029059653.1	WP_029059653.1	1230
24.7707	24.2804	24.7831	24.7359	24.506	24.1316						10	10	10	27.4	27.4	27.4	40.792	0	35.218	99171000	47	0.252117	0.701191	0.153606	0.635558	WP_029059656.1	WP_029059656.1	1231
22.2917	22.2873	22.548	21.6311	22.3995	21.9697						5	5	5	5.4	5.4	5.4	137.96	0	6.8978	9864700	10	0.720323	0.364487	0.375556	1.57488	WP_029059658.1	WP_029059658.1	1232
26.0883	26.0489	26.0726	26.0969	25.8953	25.9211						19	19	19	41.5	41.5	41.5	51.355	0	71.512	294740000	89	0.700561	0.377855	0.0988763	1.53631	WP_029059660.1	WP_029059660.1	1233
23.7628	23.5223	23.7813	23.7987	23.8142	23.632						4	4	4	15.2	15.2	15.2	35.533	0	15.134	53109000	13	0.228997	0.722726	-0.0595086	-0.584595	WP_029059666.1	WP_029059666.1	1234
22.5723	22.6889	23.375	23.6223	23.1557	23.2118						5	5	5	26.6	26.6	26.6	23.198	0	11.266	39233000	19	0.709345	0.371295	-0.45116	-1.55345	WP_029059671.1	WP_029059671.1	1236
22.5039	22.2222	23.5921	24.8658	24.1595	24.324						11	11	11	36.8	36.8	36.8	39.364	0	119.92	72684000	26	1.63335	0.0988856	-1.67699	-3.57545	WP_029059673.1	WP_029059673.1	1237
25.395	25.2792	25.662	26.0705	25.8809	26.351						6	6	6	38.2	38.2	38.2	14.713	0	28.283	267280000	52	1.67866	0.0940992	-0.655394	-3.69332	WP_029059675.1	WP_029059675.1	1238
22.1509	22.2627	22.7093	25.9196	25.5345	25.6416				+	LFQ intensity 2AEP_LFQ intensity NH3	14	14	14	36.6	36.6	36.6	46.187	0	32.878	155450000	44	4.06748	0.00396996	-3.32423	-16.1681	WP_029059676.1	WP_029059676.1	1239
24.7094	24.3304	24.7107	24.7465	24.6098	24.3521						3	3	3	45.9	45.9	45.9	17.252	0	32.562	119270000	26	0.0275026	0.963632	0.0140438	0.0819325	WP_029059678.1	WP_029059678.1	1240
22.6926	22.5735	25.1758	21.7377	24.8384	24.904						5	5	5	45	45	45	24.152	0	44.955	83797000	24	0.0916523	0.887966	-0.346054	-0.257157	WP_029059680.1	WP_029059680.1	1241
23.2523	22.2667	22.5338	23.9073	23.7733	23.5406						7	7	7	17.6	17.6	17.6	46.946	0	18.184	49367000	21	1.55303	0.110194	-1.05615	-3.37214	WP_029059691.1	WP_029059691.1	1242
25.6433	25.6841	25.4796	25.859	25.9812	26.1691						15	15	15	54.6	54.6	54.6	36.875	0	57.751	275310000	85	1.66294	0.0956455	-0.400751	-3.65217	WP_029059695.1	WP_029059695.1	1243
24.2724	24.2495	24.5705	24.9745	24.5416	24.9034						8	8	8	24.3	24.3	24.3	29.606	0	21.498	117600000	53	1.22741	0.176602	-0.442363	-2.61295	WP_029059698.1	WP_029059698.1	1245
25.5369	25.4839	25.6422	25.5948	25.3545	25.3766						20	20	20	37.4	37.4	37.4	59.526	0	52.274	189630000	83	0.554997	0.464261	0.112356	1.25251	WP_029059699.1	WP_029059699.1	1246
23.7924	25.3329	23.156	25.3279	26.7609	26.9159						15	15	15	38.3	38.3	38.3	57.009	0	44.393	269420000	47	1.28106	0.164191	-2.24115	-2.73166	WP_029059709.1	WP_029059709.1	1247
28.8143	28.649	28.5748	27.7714	27.4747	27.7648				+	LFQ intensity 2AEP_LFQ intensity NH3	20	20	20	73.6	73.6	73.6	40.269	0	123.97	1054100000	118	2.95041	0.0152832	1.00906	8.35702	WP_029059716.1;WP_029058152.1	WP_029059716.1	1248
31.161	30.9995	30.8403	29.5945	29.1272	29.3879				+	LFQ intensity 2AEP_LFQ intensity NH3	20	20	20	62.3	62.3	62.3	40.542	0	269.45	4610900000	170	3.24169	0.0106806	1.6304	9.94917	WP_029059717.1	WP_029059717.1	1249
24.5533	24.8943	22.7947	23.9258	21.9219	22.4691						6	6	6	11.2	11.2	11.2	61.999	0	29.675	39752000	20	0.672126	0.395769	1.30853	1.48088	WP_029059718.1	WP_029059718.1	1250
23.9715	23.9334	23.5536	24.1551	23.8895	24.0281						12	12	12	18.4	18.4	18.4	78.763	0	21.781	92635000	37	0.594904	0.439171	-0.204735	-1.33044	WP_029059722.1	WP_029059722.1	1252
25.578	25.5755	22.7084	25.7128	25.7205	25.652						21	21	21	44.9	44.9	44.9	77.727	0	81.63	206360000	79	0.489337	0.507427	-1.07446	-1.12351	WP_029059724.1	WP_029059724.1	1253
25.9076	25.6301	25.2697	26.1493	25.704	25.5111						16	16	16	32.9	32.9	32.9	72.24	0	55.296	256480000	69	0.283148	0.669295	-0.185648	-0.702642	WP_029059725.1	WP_029059725.1	1254
25.8174	25.707	25.5645	25.9031	25.7915	25.566						15	15	15	41	41	41	55.782	0	63.072	235640000	75	0.176266	0.785073	-0.0572472	-0.464572	WP_029059726.1	WP_029059726.1	1255
25.3658	25.3615	25.1432	25.314	25.0103	25.1816						11	11	11	37.8	37.8	37.8	40.847	0	92.416	163740000	62	0.457715	0.528045	0.121532	1.06085	WP_029059733.1	WP_029059733.1	1256
23.9033	24.5874	23.9654	23.7629	23.6845	23.872						8	8	8	23.8	23.8	23.8	53.296	0	44.749	69425000	36	0.775796	0.334548	0.378888	1.68346	WP_029059734.1	WP_029059734.1	1257
21.9105	22.8959	23.3354	23.8185	23.696	23.893						4	4	4	15.4	15.4	15.4	33.782	0	10.781	48470000	25	1.2033	0.181749	-1.08858	-2.5603	WP_029059742.1	WP_029059742.1	1258
26.5672	26.3645	25.7528	26.4638	26.3001	26.3662						14	14	14	36.7	36.7	36.7	53.988	0	73.686	378030000	65	0.233944	0.717687	-0.148512	-0.595575	WP_029059745.1	WP_029059745.1	1259
23.4121	24.0484	23.6385	23.7651	23.462	22.9532						8	8	8	23.4	23.4	23.4	44.585	0	35.697	47599000	25	0.435452	0.541627	0.306266	1.01644	WP_029059755.1	WP_029059755.1	1263
24.7523	24.3771	24.8146	21.7297	22.3271	21.7415				+	LFQ intensity 2AEP_LFQ intensity NH3	15	15	15	25.5	25.5	25.5	79.919	0	32.753	42661000	32	3.45915	0.00822155	2.71526	11.3177	WP_029059763.1	WP_029059763.1	1265
26.9043	26.9432	26.7441	26.8746	26.7411	26.5052						27	27	27	47.9	47.9	47.9	65.697	0	193.4	479130000	159	0.561596	0.45996	0.156892	1.26542	WP_029059772.1	WP_029059772.1	1268
27.4934	27.2295	27.355	26.5776	26.0699	26.6063						12	12	12	49.2	49.2	49.2	41.518	0	66.335	442330000	109	2.11026	0.0501346	0.941396	4.95061	WP_029059781.1	WP_029059781.1	1270
27.0332	27.031	27.7279	27.0488	26.9739	27.2062						12	12	12	62	62	62	26.153	0	76.69	575560000	97	0.31786	0.636392	0.187693	0.776154	WP_029059783.1	WP_029059783.1	1271
21.3807	22.7032	22.0651	21.4983	21.5019	21.7644						3	3	3	12.8	12.8	12.8	29.793	0	8.8771	11106000	14	0.516833	0.489355	0.461516	1.17769	WP_029059785.1	WP_029059785.1	1272
22.4191	21.9051	22.826	22.7136	22.331	21.3466						4	4	4	34.2	34.2	34.2	16.634	0	6.8377	18541000	14	0.20027	0.756308	0.252986	0.519923	WP_029059786.1	WP_029059786.1	1273
23.9845	22.1778	22.4255	24.2321	24.5216	24.5368						3	3	3	34.7	34.7	34.7	21.636	0	48.536	76304000	16	1.28051	0.164191	-1.56756	-2.73045	WP_029059793.1	WP_029059793.1	1277
25.4215	24.1178	23.559	25.4404	25.691	25.4881						14	14	14	35.7	35.7	35.7	68.496	0	45.734	178830000	62	0.987688	0.24949	-1.17373	-2.10667	WP_029059797.1	WP_029059797.1	1279
21.8072	23.747	23.8515	23.8877	24.5101	23.6302						13	13	13	24.4	24.4	24.4	97.345	0	36.594	70910000	34	0.540411	0.473361	-0.874119	-1.22396	WP_029059799.1	WP_029059799.1	1280
23.0889	21.9154	22.142	23.4707	23.3491	23.6403						7	7	7	30.2	30.2	30.2	43.693	0	25.953	40832000	22	1.39519	0.139765	-1.10463	-2.9921	WP_029059806.1	WP_029059806.1	1281
21.9387	23.3679	22.5236	23.7731	23.9943	22.0825						5	5	5	10.9	10.9	10.9	71.076	0	16.63	35846000	11	0.387144	0.577401	-0.673276	-0.919065	WP_029059808.1	WP_029059808.1	1282
21.7478	22.6386	22.0842	24.1828	23.8699	23.9653				+	LFQ intensity 2AEP_LFQ intensity NH3	4	4	4	31.7	31.7	31.7	15.564	0	12.718	48694000	18	2.58971	0.0243569	-1.84914	-6.7069	WP_029059809.1	WP_029059809.1	1283
24.6683	23.9444	21.9588	26.0084	25.8121	25.7862						12	12	12	33.3	33.3	33.3	40.515	0	72.501	204280000	54	1.34868	0.149975	-2.34509	-2.88462	WP_029059810.1	WP_029059810.1	1284
22.765	23.3669	22.7551	22.1228	22.3568	21.9149						2	2	2	12.9	12.9	12.9	25.319	0	26.13	23338000	14	1.59341	0.104359	0.830863	3.47348	WP_029059831.1	WP_029059831.1	1288
22.9456	21.9146	23.6398	22.254	21.6748	22.3501						2	2	2	3.8	3.8	3.8	51.983	0	29.029	12381000	6	0.610904	0.432648	0.740372	1.36163	WP_029059838.1	WP_029059838.1	1289
26.2724	25.9408	26.7956	26.2421	26.6473	27.0555						5	5	5	48.6	48.6	48.6	15.395	0	27.252	382670000	61	0.383672	0.579844	-0.312022	-0.912005	WP_029059848.1	WP_029059848.1	1291
27.0282	26.8094	27.1695	26.9611	27.2066	27.2445						5	5	5	24.1	24.1	24.1	22.174	0	108.76	559690000	57	0.418899	0.55111	-0.13503	-0.983246	WP_029059868.1	WP_029059868.1	1295
27.1619	26.1902	27.091	26.4154	26.91	27.2737						10	10	10	67.4	67.4	67.4	14.867	0	148.59	526480000	61	0.0444117	0.937351	-0.0519746	-0.130065	WP_029059869.1	WP_029059869.1	1296
24.4709	24.156	24.3776	23.8316	24.3182	24.0491						11	11	11	25.5	25.5	25.5	57.275	0	92.816	83544000	40	0.727878	0.361956	0.268485	1.58963	WP_029059871.1	WP_029059871.1	1298
26.9048	26.9071	26.8119	26.7524	26.5643	26.831						20	20	20	43.2	43.2	43.2	50.454	0	46.063	498950000	100	0.867695	0.290453	0.158716	1.86499	WP_029059873.1	WP_029059873.1	1299
24.2881	21.8786	24.4656	24.1264	24.2184	24.141						3	3	3	33.7	33.7	33.7	20.847	0	27.366	74452000	18	0.300737	0.652715	-0.617837	-0.740078	WP_029059874.1	WP_029059874.1	1300
22.2271	22.0916	22.8043	25.1753	25.6098	25.7953				+	LFQ intensity 2AEP_LFQ intensity NH3	12	12	12	55.8	55.8	55.8	25.338	0	82.445	135310000	38	3.4174	0.00855203	-3.15245	-11.0419	WP_029059875.1	WP_029059875.1	1301
25.6168	25.873	26.0045	25.3784	25.5884	25.5163						9	9	9	46.3	46.3	46.3	31.368	0	24.37	193130000	46	1.22353	0.177716	0.337098	2.60444	WP_029059876.1	WP_029059876.1	1302
26.4511	26.1382	26.7376	26.7427	26.8433	26.8182						14	14	14	70	70	70	25.328	0	108.19	436040000	95	0.956617	0.259548	-0.359083	-2.04348	WP_029059879.1	WP_029059879.1	1303
22.6935	22.6541	22.3229	23.1203	22.7566	21.4995						6	6	6	18.6	18.6	18.6	35.796	0	16.283	29748000	19	0.0677758	0.916232	0.0980269	0.194166	WP_029059882.1	WP_029059882.1	1305
22.7596	22.3358	22.4877	22.7619	22.7564	22.8769						5	5	5	12.6	12.6	12.6	54.75	0	9.3355	26751000	18	0.975582	0.252705	-0.270707	-2.082	WP_029059892.1	WP_029059892.1	1306
21.5378	22.3859	21.4286	25.6657	25.2328	25.0618				+	LFQ intensity 2AEP_LFQ intensity NH3	12	12	12	30.4	30.4	30.4	51.178	0	132.84	120510000	37	3.25842	0.0106316	-3.53599	-10.0486	WP_029059899.1	WP_029059899.1	1308
25.0284	24.324	24.4853	24.6794	24.8333	24.7574						16	16	16	38.1	38.1	38.1	54.63	0	46.506	115660000	66	0.264376	0.688039	-0.144137	-0.66223	WP_029059950.1	WP_029059950.1	1312
26.9213	26.7912	26.8044	26.5899	26.2634	26.5302						22	22	22	43.9	43.9	43.9	58.083	0	89.742	419220000	123	1.596	0.104202	0.377755	3.48002	WP_029059958.1	WP_029059958.1	1315
22.2441	22.4876	22.5928	22.9084	22.4767	22.3959						4	4	4	12.6	12.6	12.6	47.364	0	33.382	25036000	22	0.330396	0.624368	-0.152184	-0.802356	WP_029059973.1	WP_029059973.1	1319
26.2459	26.3745	26.0289	26.1822	25.9257	26.1606						10	10	10	27.2	27.2	27.2	56.515	0	94.721	304570000	52	0.415217	0.554528	0.126933	0.975839	WP_029059974.1	WP_029059974.1	1320
22.2932	22.4181	21.9884	22.7175	22.558	22.6526						4	4	4	21.6	21.6	21.6	27.902	0	22.523	22109000	18	1.40558	0.138175	-0.409468	-3.0164	WP_029059975.1	WP_029059975.1	1321
24.3611	24.3943	24.6354	24.5847	24.1787	24.4079						9	9	9	29	29	29	45.348	0	98.558	103260000	61	0.192309	0.763845	0.0732015	0.501706	WP_029059980.1	WP_029059980.1	1323
23.831	23.3505	22.945	24.1598	21.1472	23.9958						3	3	3	34.5	34.5	34.5	15.804	0	30.439	44963000	12	0.0972306	0.88247	0.27453	0.271546	WP_029059981.1	WP_029059981.1	1324
23.1724	23.1542	24.074	22.915	22.9229	22.1357						7	7	7	23.5	23.5	23.5	39.872	0	41.19	30159000	19	0.945126	0.264286	0.80899	2.02023	WP_029059991.1	WP_029059991.1	1327
25.9807	26.0818	26.1102	26.5358	26.4381	26.411				+	LFQ intensity 2AEP_LFQ intensity NH3	9	9	9	38.3	38.3	38.3	38.985	0	174.9	375090000	67	2.75022	0.0199791	-0.404051	-7.40153	WP_029059992.1	WP_029059992.1	1328
23.9435	22.6917	23.4297	21.4591	23.6461	23.9792						4	4	4	12.4	12.4	12.4	52.723	0	17.232	48275000	25	0.138939	0.836149	0.326819	0.37571	WP_029059995.1	WP_029059995.1	1329
22.213	24.7292	22.1469	23.9182	23.7573	22.0778						6	6	6	36.8	36.8	36.8	33.515	0	52.294	56189000	26	0.0752657	0.906562	-0.221418	-0.214182	WP_029060001.1	WP_029060001.1	1332
30.3253	29.9053	30.202	31.2342	30.72	31.3171						12	12	12	43.7	43.7	43.7	34.365	0	159.75	8009700000	225	1.86833	0.0722902	-0.94625	-4.21409	WP_029060005.1	WP_029060005.1	1335
20.8823	22.0771	23.0341	22.9076	22.9139	22.9447						3	3	3	16.2	16.2	16.2	25.093	0	6.3535	21997000	9	0.674014	0.394957	-0.92422	-1.48456	WP_029060024.1	WP_029060024.1	1338
22.2242	21.8436	22.9307	22.519	22.597	22.6633						8	8	8	15.6	15.6	15.6	64.429	0	26.419	17682000	26	0.334149	0.623292	-0.260239	-0.810168	WP_029060025.1	WP_029060025.1	1339
24.8793	24.6878	23.294	25.773	25.5726	25.6297						14	14	14	52.7	52.7	52.7	35.576	0	90.84	186190000	53	1.27847	0.16447	-1.37143	-2.72589	WP_029060026.1	WP_029060026.1	1340
25.8035	26.0798	25.8309	26.9738	26.9951	27.0049				+	LFQ intensity 2AEP_LFQ intensity NH3	7	7	7	31.2	31.2	31.2	31.658	0	93.382	451380000	61	3.59929	0.00686062	-1.08651	-12.2922	WP_029060039.1	WP_029060039.1	1342
25.5184	26.1348	25.6647	26.9082	26.9755	26.7833				+	LFQ intensity 2AEP_LFQ intensity NH3	9	9	9	41.4	41.4	41.4	27.54	0	51.85	426920000	52	2.34216	0.0355494	-1.11636	-5.74556	WP_029060041.1	WP_029060041.1	1343
22.3887	21.9446	23.3095	22.5744	22.6098	22.9334						2	2	2	15	15	15	21.964	0	10.565	15993000	7	0.140224	0.835399	-0.158294	-0.378832	WP_029060045.1	WP_029060045.1	1345
22.5688	22.8978	23.2857	22.8866	22.9481	22.8622						9	9	9	28.8	28.8	28.8	42.897	0	46.565	30283000	33	0.029684	0.960568	0.018418	0.0882313	WP_029060046.1	WP_029060046.1	1346
23.4363	22.2297	22.8121	23.6878	23.5512	22.9448						4	4	4	15.2	15.2	15.2	35.12	0	13.539	37632000	11	0.61261	0.432317	-0.568568	-1.36496	WP_029060057.1	WP_029060057.1	1350
25.6058	25.5968	25.6436	25.6479	25.8064	25.7928						13	13	13	59	59	59	31.866	0	216.24	229900000	74	1.19127	0.18367	-0.133601	-2.5342	WP_029060058.1	WP_029060058.1	1351
23.9195	21.6507	22.3881	23.9605	23.6268	23.9363						10	10	10	24.7	24.7	24.7	64.098	0	63.624	64898000	39	0.812682	0.317072	-1.18844	-1.75603	WP_029060068.1	WP_029060068.1	1354
22.0253	23.4906	23.933	24.088	23.9441	24.258						5	5	5	19.7	19.7	19.7	42.206	0	20.677	61069000	37	0.744902	0.351677	-0.947119	-1.62292	WP_029060070.1	WP_029060070.1	1355
25.6995	25.6681	25.8316	25.8998	25.8468	25.6526						22	22	22	33.8	33.8	33.8	80.58	0	69.6	242820000	105	0.299877	0.653247	-0.0666555	-0.738256	WP_029060073.1	WP_029060073.1	1356
28.154	28.141	28.5355	28.4521	28.3935	28.4942						12	12	12	55.6	55.6	55.6	27.32	0	80.745	1337800000	97	0.569109	0.455631	-0.169795	-1.2801	WP_029060078.1	WP_029060078.1	1357
24.0948	23.3374	23.3299	24.4632	24.221	24.4777						8	8	8	41.8	41.8	41.8	36.972	0	34.9	83264000	30	1.39666	0.139726	-0.799921	-2.99554	WP_029060081.1	WP_029060081.1	1358
26.3307	26.2481	26.6676	26.7745	26.6331	26.8901						12	12	12	55.6	55.6	55.6	33.676	0	119.32	435940000	62	1.11141	0.205472	-0.350414	-2.36342	WP_029060083.1	WP_029060083.1	1359
23.5301	23.3855	23.5122	23.5457	23.2797	23.3298						9	9	9	19.5	19.5	19.5	51.386	0	19.373	45512000	32	0.413501	0.556005	0.0908642	0.972384	WP_029060086.1	WP_029060086.1	1360
26.807	26.7601	26.5189	26.5049	26.3452	26.3541						16	16	16	39.5	39.5	39.5	61.426	0	91.24	397580000	105	1.33277	0.153047	0.293922	2.8483	WP_029060092.1	WP_029060092.1	1362
23.1306	23.0165	22.9998	22.9968	23.0185	23.1905						8	8	8	23.8	23.8	23.8	39.484	0	11.854	36564000	31	0.0952246	0.883738	-0.0196527	-0.266385	WP_029060097.1	WP_029060097.1	1364
25.3662	25.2221	25.294	25.3395	25.1176	25.1955						11	11	11	41.3	41.3	41.3	33.986	0	23.486	171660000	45	0.423381	0.549877	0.0765934	0.992249	WP_029060105.1	WP_029060105.1	1366
24.9785	24.7491	25.0952	25.0995	24.6254	24.8047						9	9	9	29.6	29.6	29.6	42.46	0	52.37	131210000	54	0.22227	0.730806	0.0977186	0.569592	WP_029060106.1	WP_029060106.1	1367
22.7035	22.4925	22.4839	25.4712	25.865	25.869				+	LFQ intensity 2AEP_LFQ intensity NH3	10	10	10	52.2	52.2	52.2	26.61	0	25.919	161500000	34	4.52843	0.00235339	-3.1751	-21.1364	WP_029060108.1	WP_029060108.1	1368
27.3593	27.4525	27.6136	27.975	28.1259	28.1212				+	LFQ intensity 2AEP_LFQ intensity NH3	21	21	21	82.2	82.2	82.2	26.19	0	217.39	1012400000	164	2.58995	0.0243569	-0.598918	-6.70789	WP_029060109.1	WP_029060109.1	1369
30.7626	30.6021	30.6905	31.2208	30.8903	31.1586						22	22	22	79.1	79.1	79.1	36.309	0	323.31	8954200000	486	1.65425	0.0960675	-0.404839	-3.62951	WP_029060112.1	WP_029060112.1	1370
23.8065	23.868	22.9011	22.1437	22.2582	23.4247						2	2	2	21.4	21.4	21.4	14	0	4.8646	35339000	10	0.824506	0.310704	0.916306	1.77937	WP_029060116.1	WP_029060116.1	1371
24.9777	24.8264	24.7593	24.3209	24.2217	24.1502				+	LFQ intensity 2AEP_LFQ intensity NH3	10	10	10	16.6	16.6	16.6	60.008	0	19.6	93207000	44	2.8073	0.018939	0.62356	7.66341	WP_029060117.1	WP_029060117.1	1372
25.067	24.7616	24.7726	25.2599	25.0179	25.1125						12	12	12	27	27	27	49.756	0	31.561	151400000	71	1.00901	0.242065	-0.263037	-2.15032	WP_029060118.1	WP_029060118.1	1373
24.2362	22.3984	24.5194	24.5594	24.5595	24.4169						10	10	10	53.1	53.1	53.1	34.615	0	78.824	92416000	53	0.523645	0.483828	-0.793907	-1.19107	WP_029060121.1	WP_029060121.1	1374
24.1558	21.5074	24.5038	24.1645	24.2931	23.9955						7	7	7	30.8	30.8	30.8	26.662	0	17.746	73551000	25	0.330276	0.624368	-0.76206	-0.802106	WP_029060123.1	WP_029060123.1	1376
25.3546	25.2221	25.1264	25.4156	25.1393	25.0879						18	18	18	40.7	40.7	40.7	61.966	0	79.053	161650000	68	0.0572566	0.925702	0.0201047	0.165629	WP_029060124.1	WP_029060124.1	1377
26.0379	26.3002	25.1732	26.3055	25.8463	26.1389						15	15	15	56	56	56	47.613	0	83.472	298040000	69	0.286502	0.669295	-0.259782	-0.709812	WP_029060136.1	WP_029060136.1	1380
23.2243	23.0518	23.4064	23.2247	23.2717	23.06						7	7	7	24.4	24.4	24.4	38.671	0	20.152	46599000	26	0.127542	0.843611	0.0420291	0.347806	WP_029060137.1	WP_029060137.1	1381
25.7962	25.546	26.217	25.8036	25.793	25.8584						16	16	16	73.5	73.5	73.5	28.952	0	90.84	234630000	92	0.0612378	0.923036	0.0347341	0.17649	WP_029060140.1	WP_029060140.1	1382
25.7613	25.4534	25.2616	25.4707	25.0758	25.3203						10	10	10	27.6	27.6	27.6	50.574	0	38.141	181990000	36	0.474835	0.518165	0.203141	1.09483	WP_029060141.1	WP_029060141.1	1383
25.4328	25.1337	25.1491	24.0345	24.0481	24.2397				+	LFQ intensity 2AEP_LFQ intensity NH3	10	10	10	21.8	21.8	21.8	57.205	0	35.198	92493000	57	3.18397	0.0112605	1.13106	9.61292	WP_029060163.1	WP_029060163.1	1385
24.2421	23.7551	24.841	23.7011	21.0933	21.4202						2	2	2	8.9	8.9	8.9	39.392	0	4.9896	43876000	11	1.18183	0.184812	2.20785	2.51378	WP_029060164.1	WP_029060164.1	1386
25.6951	25.4706	25.2062	25.4809	25.362	25.0331						19	19	19	32.3	32.3	32.3	80.17	0	127.23	169910000	71	0.353018	0.60329	0.165336	0.849232	WP_029060166.1	WP_029060166.1	1387
21.8989	23.4073	23.2783	24.1499	23.9314	24.4418						7	7	7	54.6	54.6	54.6	20.718	0	13.917	66562000	26	1.22171	0.177988	-1.31288	-2.60046	WP_029060168.1	WP_029060168.1	1388
23.1907	23.5772	23.0916	21.9768	21.1456	22.751						1	1	1	8.5	8.5	8.5	23.243	0	47.528	10488000	4	1.28043	0.164191	1.32866	2.73025	WP_029060171.1	WP_029060171.1	1390
27.6162	27.6815	26.8874	27.5781	27.2815	27.31						36	36	36	72.5	72.5	72.5	60.545	0	229	781740000	191	0.00625258	0.992657	0.00517464	0.0190601	WP_029060175.1	WP_029060175.1	1391
20.8942	20.9785	21.7272	25.7348	25.7231	25.6785				+	LFQ intensity 2AEP_LFQ intensity NH3	10	10	10	68.9	68.9	68.9	20.368	0	59.61	156030000	35	4.1545	0.00356061	-4.51216	-17.0089	WP_029060176.1	WP_029060176.1	1392
26.6407	26.3475	26.477	26.1876	26.3213	26.2676						18	18	18	28.7	28.7	28.7	82.683	0	73.471	345370000	106	1.15699	0.193264	0.229575	2.46035	WP_029060177.1	WP_029060177.1	1393
22.6274	23.314	24.2838	25.4038	25.2239	25.6215						10	10	10	47.6	47.6	47.6	20.689	0	38.109	140790000	50	1.81546	0.0777249	-2.00802	-4.06428	WP_029060179.1	WP_029060179.1	1394
21.2705	21.3218	22.9422	24.318	21.5229	24.7799						2	2	2	12.1	12.1	12.1	34.449	0	16.931	73878000	9	0.664767	0.398239	-1.69544	-1.46655	WP_029060180.1	WP_029060180.1	1395
25.9021	25.8351	25.9055	26.0818	26.3985	26.5828						11	11	11	64.5	64.5	64.5	19.689	0	90.084	336090000	68	1.48179	0.124977	-0.47347	-3.19757	WP_029060186.1	WP_029060186.1	1396
25.0793	23.0554	25.4931	24.5309	24.5028	24.8966						4	4	4	26.5	26.5	26.5	23.291	0	21.281	115740000	25	0.0451136	0.937351	-0.100835	-0.13203	WP_029060191.1	WP_029060191.1	1401
24.0223	24.4961	24.2989	24.6052	24.799	24.3349						10	10	10	27.5	27.5	27.5	57.37	0	30.868	106270000	44	0.73193	0.360449	-0.307254	-1.59755	WP_029060199.1	WP_029060199.1	1402
23.3934	23.8619	23.7151	25.1745	21.4931	23.5748						8	8	8	17.4	17.4	17.4	48.249	0	40.508	56158000	31	0.0796484	0.903558	0.242646	0.225783	WP_029060200.1	WP_029060200.1	1403
22.7508	21.6259	22.6333	23.0803	23.2018	23.5026						9	9	9	30.6	30.6	30.6	40.32	0	18.951	39054000	28	1.14941	0.194691	-0.924936	-2.44415	WP_029060203.1	WP_029060203.1	1404
24.2031	24.0856	24.5111	23.8469	23.7903	23.6871						11	11	11	17.9	17.9	17.9	104.92	0	24.944	68461000	38	1.65718	0.0960675	0.491818	3.63715	WP_029060207.1	WP_029060207.1	1405
21.1269	22.1402	22.9084	25.3862	25.2467	25.1134				+	LFQ intensity 2AEP_LFQ intensity NH3	10	10	10	37.7	37.7	37.7	46.495	0	34.802	113730000	28	2.44069	0.0300206	-3.19023	-6.11323	WP_029060208.1	WP_029060208.1	1406
26.6671	26.3489	25.3785	27.0235	26.8392	26.5704						20	20	20	52.2	52.2	52.2	50.27	0	158.82	476350000	95	0.763995	0.341931	-0.679527	-1.66031	WP_029060209.1	WP_029060209.1	1407
24.9982	24.9621	25.3403	25.1472	25.3465	25.8035						11	11	11	96.9	96.9	96.9	16.759	0	62.232	165170000	41	0.657958	0.40252	-0.332197	-1.45329	WP_029060211.1	WP_029060211.1	1408
25.6243	25.5673	22.6586	24.9605	25.8342	24.7817						2	2	2	9.4	9.4	9.4	58.309	0	30.921	197080000	28	0.216961	0.734986	-0.575413	-0.557691	WP_029060217.1	WP_029060217.1	1410
24.5913	24.4264	24.0388	25.0426	24.6677	24.7711						15	15	15	40.1	40.1	40.1	49.546	0	145.49	118640000	57	1.12658	0.202261	-0.474991	-2.39554	WP_029060220.1	WP_029060220.1	1412
22.7712	22.652	22.3539	23.1735	22.3012	22.4583						4	4	4	8	8	8	43.839	0	3.0944	13908000	8	0.0609564	0.923036	-0.0519689	-0.175725	WP_029060223.1	WP_029060223.1	1414
24.1368	23.9593	21.7116	24.5908	23.9942	24.0714						9	9	9	34.2	34.2	34.2	46.379	0	18.448	78667000	35	0.519536	0.487646	-0.949539	-1.183	WP_029060225.1	WP_029060225.1	1415
22.7829	22.6392	22.2449	22.1079	22.6079	23.0018						1	1	1	13.4	13.4	13.4	15.793	0	5.9327	12841000	5	0.0183932	0.976143	-0.0168502	-0.0553255	WP_029060230.1	WP_029060230.1	1417
23.5249	21.5095	22.8385	24.0409	24.3469	24.5984						8	8	8	55.2	55.2	55.2	30.476	0	21.681	72021000	32	1.30253	0.160541	-1.70444	-2.77981	WP_029060238.1	WP_029060238.1	1419
23.7176	21.8827	22.9126	23.6116	23.5612	23.6518						8	8	8	23.7	23.7	23.7	48.125	0	15.521	50913000	29	0.655876	0.402814	-0.770541	-1.44923	WP_029060244.1	WP_029060244.1	1421
26.6082	26.368	26.2923	26.0892	26.1239	26.4302						10	10	10	68.4	68.4	68.4	10.315	0	86.265	344480000	82	0.653638	0.404236	0.208413	1.44487	WP_029060251.1	WP_029060251.1	1424
32.2846	32.5095	32.3332	31.98	31.9964	32.0008				+	LFQ intensity 2AEP_LFQ intensity NH3	70	70	70	87	87	87	57.645	0	323.31	18397000000	989	2.29811	0.0375185	0.383368	5.58717	WP_029060252.1	WP_029060252.1	1425
21.4303	21.8985	23.226	22.9752	22.9044	22.8215						4	4	4	8.6	8.6	8.6	80.396	0	13.784	23603000	13	0.59253	0.439691	-0.715425	-1.32582	WP_037544970.1	WP_037544970.1	1427
27.05	26.7694	27.4422	26.5702	27.0031	26.9696						10	10	10	71.5	71.5	71.5	17.573	0	111.04	557460000	74	0.427132	0.548064	0.23955	0.999778	WP_037544979.1	WP_037544979.1	1429
25.5114	25.3741	25.5727	22.2453	22.1363	21.1197				+	LFQ intensity 2AEP_LFQ intensity NH3	11	11	11	41.8	41.8	41.8	39.962	0	30.198	61169000	32	3.25965	0.0106316	3.65232	10.056	WP_037545087.1	WP_037545087.1	1435
26.4767	26.7106	26.311	26.715	26.6136	26.5959						21	21	21	62.9	62.9	62.9	40.243	0	112.94	433910000	152	0.511688	0.492353	-0.142104	-1.16757	WP_037545108.1	WP_037545108.1	1436
25.6943	25.184	25.4035	25.6155	25.7049	25.6847						15	15	15	42.5	42.5	42.5	55.465	0	46.558	243250000	83	0.735588	0.358048	-0.241109	-1.6047	WP_037545165.1	WP_037545165.1	1437
27.0346	26.6748	26.6951	25.4224	24.7662	25.5551				+	LFQ intensity 2AEP_LFQ intensity NH3	13	13	13	45.6	45.6	45.6	43.245	0	87.209	257810000	80	2.34241	0.0355494	1.55364	5.74646	WP_037545199.1	WP_037545199.1	1440
21.9366	21.4134	22.389	25.5507	25.1131	24.7203				+	LFQ intensity 2AEP_LFQ intensity NH3	10	10	10	6.9	6.9	6.9	225.96	0	32.403	124580000	27	3.01468	0.0140369	-3.21505	-8.68661	WP_037545252.1	WP_037545252.1	1443
21.7765	21.9848	22.8334	22.2689	22.275	22.2245						8	8	8	16.5	16.5	16.5	70.963	0	11.12	26029000	16	0.0621628	0.923036	-0.0579274	-0.179002	WP_037545256.1	WP_037545256.1	1445
21.9466	22.2362	22.6189	23.0576	22.3886	22.8814						4	4	4	35.5	35.5	35.5	17.233	0	19.865	19766000	14	0.845664	0.299261	-0.508647	-1.82124	WP_037545266.1	WP_037545266.1	1446
26.3776	26.2001	26.5534	26.459	26.437	26.4272						17	17	17	68.8	68.8	68.8	41.311	0	135.28	374470000	107	0.247267	0.706683	-0.0640093	-0.624941	WP_037545314.1	WP_037545314.1	1448
27.2446	27.5056	27.1241	28.2177	27.8244	27.7874						19	19	19	71	71	71	38.152	0	98.669	1024900000	116	1.66777	0.0950716	-0.651753	-3.66479	WP_037545324.1	WP_037545324.1	1449
25.2277	24.8427	24.9436	25.0666	24.8375	24.7565						15	15	15	30.9	30.9	30.9	50.693	0	34.761	136150000	51	0.327191	0.628068	0.11776	0.795674	WP_037545371.1	WP_037545371.1	1450
27.7831	27.4425	28.2539	27.7509	27.7846	27.8608						15	15	15	68.6	68.6	68.6	21.087	0	54.242	953690000	117	0.039645	0.943998	0.0277036	0.116654	WP_037545374.1	WP_037545374.1	1451
25.1389	24.9113	25.0383	24.5119	24.5353	24.8394						13	13	13	33.3	33.3	33.3	59.245	0	68.813	122490000	46	1.49197	0.122495	0.400639	3.22222	WP_037545842.1	WP_037545842.1	1454
22.0435	22.5286	22.9073	25.4553	25.5164	25.2301				+	LFQ intensity 2AEP_LFQ intensity NH3	7	7	7	37	37	37	40.241	0	23.572	128070000	30	3.40832	0.00856153	-2.90747	-10.9827	WP_037545908.1	WP_037545908.1	1460
24.5368	24.472	24.3425	24.2316	23.96	24.1923						13	13	13	34.3	34.3	34.3	68.332	0	52.401	82774000	44	1.46441	0.128091	0.322438	3.15576	WP_037545972.1	WP_037545972.1	1463
26.8598	26.6475	26.8699	26.2341	26.3718	26.1778				+	LFQ intensity 2AEP_LFQ intensity NH3	17	17	17	32.6	32.6	32.6	69.895	0	124.11	377450000	100	2.33925	0.0355494	0.531151	5.73497	WP_037545979.1	WP_037545979.1	1464
21.6417	22.6815	22.2178	23.7245	23.0789	23.3735						4	4	4	28.1	28.1	28.1	19.813	0	84.119	36499000	21	1.57383	0.107292	-1.21192	-3.42412	WP_037546001.1	WP_037546001.1	1466
22.5129	21.6363	22.5998	23.9394	24.3809	24.2286				+	LFQ intensity 2AEP_LFQ intensity NH3	8	8	8	26.1	26.1	26.1	54.308	0	24.548	62749000	28	2.35468	0.0352884	-1.93329	-5.79124	WP_037546142.1	WP_037546142.1	1472
23.3131	23.3313	23.0071	23.5398	23.4564	22.1671						7	7	7	26.5	26.5	26.5	37.114	0	9.5745	38522000	23	0.131035	0.840256	0.162728	0.356399	WP_037546168.1	WP_037546168.1	1473
29.54	29.8032	29.3862	29.5157	29.2237	29.3141						28	28	28	77.8	77.8	77.8	53.471	0	323.31	2836800000	245	0.686815	0.386464	0.225273	1.50951	WP_037546183.1	WP_037546183.1	1474
24.1948	23.6644	23.5457	23.6201	23.5075	23.543						9	9	9	29	29	29	51.338	0	28.658	61670000	35	0.533272	0.476527	0.244759	1.20996	WP_037546223.1	WP_037546223.1	1477
21.6072	21.8762	23.2147	23.7993	23.8678	22.8091						3	3	3	15.9	15.9	15.9	37.006	0	16.066	41282000	14	0.978046	0.251814	-1.25933	-2.08701	WP_037546230.1	WP_037546230.1	1478
23.8621	23.7204	23.8066	24.2186	24.0866	23.8094						10	10	10	43.7	43.7	43.7	41.275	0	71.484	77518000	29	0.884208	0.285124	-0.241854	-1.8979	WP_037546234.1	WP_037546234.1	1479
22.6798	21.8937	23.0501	20.7355	21.7037	22.0467						5	5	5	25	25	25	27.973	0	5.0852	19629000	11	0.940765	0.264747	1.04592	2.01142	WP_037546240.1	WP_037546240.1	1480
23.1594	23.7366	23.9589	24.2747	24.1512	24.4677						7	7	7	36.9	36.9	36.9	25.293	0	23.141	72455000	32	1.24904	0.170293	-0.679569	-2.66055	WP_037546288.1	WP_037546288.1	1482
26.0709	26.0224	25.9405	25.7695	25.7136	25.7916				+	LFQ intensity 2AEP_LFQ intensity NH3	14	14	14	39.3	39.3	39.3	30.42	0	38.941	236020000	83	2.32302	0.0363448	0.253023	5.6763	WP_037546467.1	WP_037546467.1	1487
25.5204	25.5307	25.5953	26.3564	25.9303	26.0598						10	10	10	38.8	38.8	38.8	45.883	0	48.916	288140000	45	1.93811	0.064786	-0.566661	-4.41768	WP_037546489.1	WP_037546489.1	1490
23.2414	21.482	22.7902	22.057	24.8612	22.1045						12	12	12	11.2	11.2	11.2	151.8	0	49.475	47221000	30	0.179308	0.782233	-0.503052	-0.471659	WP_037546506.1	WP_037546506.1	1492
25.8148	25.9538	26.0435	25.8603	25.498	25.8441						12	12	12	40.8	40.8	40.8	36.721	0	70.385	249870000	62	0.681365	0.390034	0.203258	1.49889	WP_037546524.1	WP_037546524.1	1495
24.0646	24.373	22.3339	24.0848	24.3512	24.3663						9	9	9	23.6	23.6	23.6	59.872	0	52.458	72394000	31	0.455228	0.528512	-0.676952	-1.0559	WP_037546628.1	WP_037546628.1	1498
24.8054	24.6042	24.4618	24.5861	24.6287	24.9115						6	6	6	25.8	25.8	25.8	32.309	0	45.968	108060000	30	0.233943	0.717687	-0.0849946	-0.595573	WP_037546681.1	WP_037546681.1	1499
27.0214	26.6074	27.5829	26.7984	27.0221	27.1154						13	13	13	37.5	37.5	37.5	27.963	0	76.477	513460000	99	0.111817	0.867558	0.0919482	0.308635	WP_037546682.1	WP_037546682.1	1500
21.5031	21.1201	22.6327	26.0785	26.4313	26.0382				+	LFQ intensity 2AEP_LFQ intensity NH3	20	20	17	33.3	33.3	30.4	85.576	0	87.431	219490000	46	3.14804	0.0118667	-4.4307	-9.40898	WP_037546753.1;WP_051242280.1;WP_029058300.1;WP_037546839.1	WP_037546753.1	1503
27.7113	27.819	28.0225	27.734	27.8171	27.5828						29	29	29	47.1	47.1	47.1	96.74	0	168.94	928850000	165	0.540103	0.473361	0.139638	1.22335	WP_037546807.1	WP_037546807.1	1507
27.9587	27.64	27.5732	27.8801	28.169	28.0827						21	21	21	56.1	56.1	56.1	45.051	0	212.77	1083400000	146	1.02511	0.239272	-0.320005	-2.18343	WP_037546849.1	WP_037546849.1	1511
27.7756	27.7742	27.915	28.0326	28.0213	27.935						26	26	26	76.7	76.7	76.7	35.749	0	277.7	1020900000	214	1.45021	0.130827	-0.174681	-3.12182	WP_037546859.1	WP_037546859.1	1512
25.5044	24.7981	25.5342	21.7	22.0663	22.1868				+	LFQ intensity 2AEP_LFQ intensity NH3	2	2	2	32.4	32.4	32.4	8.0248	0	33.929	55491000	19	3.51555	0.00793272	3.29451	11.7007	WP_037546872.1	WP_037546872.1	1515
25.6001	25.4072	23.4299	25.5981	25.4041	25.2969						13	13	13	41.4	41.4	41.4	49.262	0	65.464	187180000	44	0.371825	0.589958	-0.620658	-0.887838	WP_037546875.1	WP_037546875.1	1516
24.9439	24.951	25.4387	25.4635	26.3179	25.1284						17	17	17	19.1	19.1	19.1	128.6	0	67.832	215660000	66	0.603256	0.436199	-0.525443	-1.34673	WP_037546877.1	WP_037546877.1	1517
23.0798	22.2154	22.6523	23.6828	23.1852	23.3821						3	3	3	12.6	12.6	12.6	40.369	0	63.13	38055000	12	1.24927	0.170293	-0.767532	-2.66105	WP_037546880.1	WP_037546880.1	1518
23.6773	21.9674	21.452	23.9438	23.8441	23.7235						3	3	3	12.4	12.4	12.4	34.791	0	6.7806	52847000	13	1.02261	0.239568	-1.47155	-2.17828	WP_037546916.1	WP_037546916.1	1521
23.8277	21.9851	22.9759	25.2709	25.4427	25.3281						11	11	11	27.4	27.4	27.4	58.048	0	34.405	131190000	40	1.97246	0.0620408	-2.41763	-4.52046	WP_037546929.1	WP_037546929.1	1523
21.7439	22.4065	22.7444	24.9869	25.1547	25.5464				+	LFQ intensity 2AEP_LFQ intensity NH3	11	11	11	38.1	38.1	38.1	34.799	0	48.763	109660000	41	3.01488	0.0140369	-2.93103	-8.68766	WP_037546960.1	WP_037546960.1	1525
24.5589	23.1541	22.7549	23.8627	23.9954	24.0901						6	6	6	26.3	26.3	26.3	44.39	0	61.326	65115000	24	0.375555	0.586463	-0.493444	-0.895458	WP_037546968.1	WP_037546968.1	1526
23.0681	23.1628	23.3072	23.3173	23.074	22.8792						5	5	5	15.7	15.7	15.7	39.817	0	18.362	36903000	28	0.243685	0.709573	0.089187	0.617076	WP_037546973.1	WP_037546973.1	1527
25.8098	25.8989	25.394	21.9567	20.9919	21.6699				+	LFQ intensity 2AEP_LFQ intensity NH3	11	11	11	27.3	27.3	27.3	58.598	0	56.973	79714000	37	3.66547	0.00654163	4.1614	12.7798	WP_037546979.1	WP_037546979.1	1529
24.2695	24.0281	24.7409	22.4789	21.0171	22.3395						4	4	4	17	17	17	37.457	0	15.072	24837000	19	2.0317	0.0567928	2.40098	4.70178	WP_037547004.1	WP_037547004.1	1532
24.2061	22.0082	25.0511	24.8693	24.3805	24.432						8	8	8	41.6	41.6	41.6	29.819	0	40.006	94690000	27	0.365759	0.593277	-0.805428	-0.875421	WP_037547009.1	WP_037547009.1	1533
26.3249	26.252	26.2565	25.3988	25.2606	25.4607				+	LFQ intensity 2AEP_LFQ intensity NH3	12	12	12	54.4	54.4	54.4	33.431	0	103.23	195190000	49	3.84564	0.00471357	0.904412	14.2034	WP_037547202.1	WP_037547202.1	1538
25.9592	25.5672	26.2751	26.0561	26.0726	25.9745						8	8	8	40	40	40	17.319	0	33.519	279880000	70	0.18541	0.774428	-0.100554	-0.485808	WP_037547299.1	WP_037547299.1	1540
26.0441	26.0174	25.9001	25.7578	26.2228	25.7646						19	19	19	28.3	28.3	28.3	119.42	0	61.55	269630000	78	0.170279	0.793461	0.0721423	0.450561	WP_037547406.1	WP_037547406.1	1544
23.7554	23.5305	23.5068	23.0689	22.5062	22.9861						8	8	8	22.4	22.4	22.4	59.466	0	37.351	24262000	18	1.74286	0.0863711	0.743822	3.86451	WP_037547438.1	WP_037547438.1	1545
26.898	26.734	26.6024	26.9106	26.9336	26.8949						21	21	21	38	38	38	71.857	0	98.398	500100000	108	0.910406	0.275935	-0.168195	-1.95032	WP_037547449.1	WP_037547449.1	1547
26.9154	27.0681	26.7247	28.1271	28.3353	28.2065				+	LFQ intensity 2AEP_LFQ intensity NH3	12	12	12	59.9	59.9	59.9	34.89	0	153.15	1045900000	78	3.46268	0.00822155	-1.32021	-11.3413	WP_037547468.1	WP_037547468.1	1551
24.5765	24.7995	22.8891	24.3642	24.5685	23.8962						9	9	9	15.6	15.6	15.6	92.526	0	19.017	89055000	33	0.106779	0.870821	-0.187927	-0.29591	WP_037547480.1	WP_037547480.1	1554
22.049	23.4614	22.3356	24.919	25.0561	24.7371				+	LFQ intensity 2AEP_LFQ intensity NH3	7	7	7	14.8	14.8	14.8	51.903	0	10.116	88608000	15	2.18358	0.0439392	-2.28874	-5.19184	WP_037547531.1	WP_037547531.1	1555
26.3046	26.033	26.3316	26.371	26.7652	26.7737						13	13	13	71.2	71.2	71.2	17.42	0	78.973	392850000	105	1.18887	0.183686	-0.413544	-2.529	WP_037547557.1	WP_037547557.1	1558
28.4652	28.3965	28.7222	29.6034	29.5979	29.6579				+	LFQ intensity 2AEP_LFQ intensity NH3	11	11	11	39.9	39.9	39.9	32.794	0	140.5	2838500000	99	3.38196	0.00892236	-1.09181	-10.8127	WP_037547559.1	WP_037547559.1	1559
21.9461	21.4973	23.5812	22.4187	22.886	22.8259						5	5	5	17.3	17.3	17.3	50.806	0	12.77	19608000	10	0.221177	0.731053	-0.368658	-0.567147	WP_037547599.1	WP_037547599.1	1560
24.6336	24.4367	24.3801	24.6815	24.2274	24.3694						10	10	10	33.3	33.3	33.3	50.918	0	34.752	79016000	41	0.137056	0.836814	0.0573622	0.371127	WP_037547603.1	WP_037547603.1	1561
22.3822	22.8911	22.7122	22.9683	22.5373	22.4899						7	7	7	19.3	19.3	19.3	51.651	0	37.354	22745000	18	0.00514732	0.992657	-0.00334676	-0.0157104	WP_037547692.1	WP_037547692.1	1564
27.6386	27.4328	27.5967	26.3097	26.4574	26.3088				+	LFQ intensity 2AEP_LFQ intensity NH3	30	30	30	51.1	51.1	51.1	77.816	0	107.45	448430000	135	3.93756	0.00436464	1.19736	14.9877	WP_037547694.1	WP_037547694.1	1565
25.3738	25.4544	25.1183	25.5367	25.3961	25.3791						15	15	15	47.8	47.8	47.8	42.518	0	92.964	185390000	78	0.466379	0.525275	-0.121754	-1.07806	WP_051241384.1	WP_051241384.1	1570
22.1343	22.6428	22.3894	22.6328	22.8968	22.0615						2	2	2	7.6	7.6	7.6	20.144	0	4.8969	24459000	9	0.188662	0.769467	-0.141528	-0.493316	WP_051241395.1	WP_051241395.1	1573
23.8512	24.1908	23.1777	24.3708	25.1597	24.5797						17	17	17	23.1	23.1	23.1	108.48	0	38.154	105690000	56	1.19219	0.18367	-0.963516	-2.53619	WP_051241402.1	WP_051241402.1	1574
26.3543	26.505	26.6642	26.4828	26.5888	26.4504						21	21	21	25	25	25	104.64	0	95.751	367280000	117	0.00164302	0.997116	0.000497182	0.00503475	WP_051241404.1	WP_051241404.1	1575
25.368	25.1026	25.1343	22.7269	21.022	22.7428				+	LFQ intensity 2AEP_LFQ intensity NH3	12	12	12	34.9	34.9	34.9	50.222	0	62.075	49404000	35	2.20499	0.0427821	3.03775	5.26401	WP_051241408.1	WP_051241408.1	1576
31.1693	31.3672	30.9728	22.6138	21.6896	21.7518				+	LFQ intensity 2AEP_LFQ intensity NH3	23	23	23	70.1	70.1	70.1	37.299	0	323.31	2893100000	145	5.0548	0.00140782	9.15135	28.6654	WP_051241420.1	WP_051241420.1	1577
28.3434	28.2521	28.1157	21.7519	22.0982	22.0549				+	LFQ intensity 2AEP_LFQ intensity NH3	18	18	18	47.4	47.4	47.4	49.074	0	87.833	379760000	75	5.99036	0.000381033	6.2687	49.1845	WP_051241422.1	WP_051241422.1	1578
24.3852	21.9494	23.23	24.9247	24.6131	24.6705						6	6	6	22.4	22.4	22.4	44.315	0	40.742	98726000	25	1.02359	0.239568	-1.54788	-2.18029	WP_051241459.1	WP_051241459.1	1581
23.7185	23.2349	23.8938	24.1622	24.2193	24.3511						5	5	5	20	20	20	25.736	0	14.055	75993000	27	1.42772	0.132926	-0.628452	-3.06846	WP_051241508.1	WP_051241508.1	1587
25.3078	25.4974	24.7472	25.7046	25.4138	25.3392						17	17	17	38.8	38.8	38.8	52.025	0	138.35	181870000	77	0.528455	0.480582	-0.301688	-1.20051	WP_051241510.1	WP_051241510.1	1588
26.9954	27.1804	27.323	28.0064	27.6933	27.7387						15	15	15	56.3	56.3	56.3	34.489	0	191.35	848770000	99	2.0467	0.0551657	-0.646489	-4.74855	WP_051241535.1	WP_051241535.1	1589
22.0125	23.6095	22.1921	24.563	24.5732	24.2913						14	14	14	31.4	31.4	31.4	62.549	0	34.905	67866000	38	1.65994	0.0959313	-1.87111	-3.64434	WP_051241544.1	WP_051241544.1	1590
23.1303	23.5377	22.9868	23.1061	23.2643	23.1935						10	10	10	34	34	34	35.902	0	43.627	41560000	32	0.0613209	0.923036	0.0302569	0.176716	WP_051241550.1	WP_051241550.1	1591
25.7511	25.4719	24.4771	25.5903	25.0364	25.189						12	12	12	49.9	49.9	49.9	43.552	0	71.025	182510000	60	0.0308608	0.958851	-0.0385195	-0.0916181	WP_051241563.1	WP_051241563.1	1593
26.3289	26.2583	25.8098	26.2535	25.8732	25.6269						10	10	10	30.7	30.7	30.7	41.142	0	75.579	282530000	46	0.367175	0.593277	0.214481	0.878321	WP_051241581.1	WP_051241581.1	1594
21.6236	23.2272	22.85	23.7808	23.7982	24.0296						6	6	6	23.1	23.1	23.1	35.509	0	24.91	41932000	18	1.24641	0.170867	-1.30256	-2.65474	WP_051241594.1	WP_051241594.1	1595
21.8827	24.0176	22.2136	24.0172	24.3641	24.056						4	4	4	36.8	36.8	36.8	18.312	0	8.7096	52547000	20	1.00555	0.242065	-1.44111	-2.14321	WP_051241598.1	WP_051241598.1	1596
21.2864	22.618	21.8248	24.1658	24.1867	22.0247						3	3	3	7.8	7.8	7.8	60.238	0	18.285	44609000	10	0.885977	0.285124	-1.54935	-1.90143	WP_051241600.1	WP_051241600.1	1597
23.0011	21.1272	23.0247	23.6582	23.5772	23.5616						8	8	8	39.3	39.3	39.3	30.823	0	28.287	38225000	22	0.900338	0.280156	-1.21465	-1.93014	WP_051241614.1	WP_051241614.1	1601
25.0695	24.651	25.1975	24.9378	24.9125	25.0595						14	14	14	36.1	36.1	36.1	69.832	0	50.74	134600000	57	0.00518988	0.992657	0.00271098	0.0158395	WP_051241635.1	WP_051241635.1	1602
22.8953	22.5519	23.4515	21.6138	22.3264	22.9722						6	6	6	19.1	19.1	19.1	50.855	0	22.373	29047000	18	0.632281	0.416473	0.662081	1.40328	WP_051241657.1	WP_051241657.1	1603
25.6607	25.6511	25.9769	26.2338	26.2084	25.9208						17	17	17	59.4	59.4	59.4	32.629	0	100.51	291680000	89	1.14781	0.194691	-0.358088	-2.44073	WP_051241659.1	WP_051241659.1	1604
23.1209	22.9692	22.8546	21.6904	22.5892	22.4426						5	5	5	7.6	7.6	7.6	83.561	0	26.529	22110000	20	1.2053	0.181749	0.740854	2.56466	WP_051241673.1	WP_051241673.1	1605
23.49	23.1706	22.5229	23.812	23.6023	23.8518						12	12	12	31.4	31.4	31.4	44.372	0	23.445	56027000	51	1.10725	0.205496	-0.694214	-2.35465	WP_051241695.1	WP_051241695.1	1609
22.7485	21.8782	22.9931	22.4502	23.6771	23.409						6	6	6	14.4	14.4	14.4	54.459	0	6.9159	21654000	11	0.563786	0.458614	-0.638848	-1.2697	WP_051241708.1	WP_051241708.1	1611
25.5659	25.9212	25.3016	26.1861	25.756	26.0279						7	7	7	23.8	23.8	23.8	45.149	0	33.67	250250000	51	0.833686	0.305338	-0.393797	-1.79752	WP_051241717.1	WP_051241717.1	1613
22.0278	22.2334	22.5797	22.0401	22.2907	22.0777						3	3	3	24.2	24.2	24.2	16.343	0	5.4034	13032000	8	0.331879	0.624304	0.144126	0.805446	WP_051241719.1	WP_051241719.1	1614
23.6091	23.3597	22.6974	23.5982	23.8046	22.4227						5	5	5	29.4	29.4	29.4	18.646	0	9.3143	51917000	18	0.0352732	0.952667	-0.0530771	-0.104247	WP_051241722.1	WP_051241722.1	1615
25.4891	25.2484	25.8143	25.9577	26.2163	26.3186						8	8	8	30.5	30.5	30.5	33.536	0	69.31	270080000	65	1.52429	0.115281	-0.646919	-3.30108	WP_051241728.1	WP_051241728.1	1616
21.8528	22.2409	23.079	20.8508	22.7888	22.732						5	5	5	9.1	9.1	9.1	97.091	0	35.24	17049000	15	0.134394	0.839756	0.267042	0.364629	WP_051241735.1	WP_051241735.1	1617
24.8188	24.3656	24.5532	25.035	25.005	24.8324						11	11	11	37.1	37.1	37.1	41.797	0	44.26	135300000	60	1.21855	0.178342	-0.378255	-2.59355	WP_051241755.1	WP_051241755.1	1618
21.3413	22.6772	22.1863	25.2536	25.1505	25.3385				+	LFQ intensity 2AEP_LFQ intensity NH3	6	6	6	33.2	33.2	33.2	25.898	0	39.106	109450000	22	2.89281	0.0158998	-3.17929	-8.0713	WP_051241763.1	WP_051241763.1	1619
27.5909	27.494	27.7803	27.2422	27.1484	27.1706						33	33	33	53.5	53.5	53.5	71.615	0	154.76	688460000	184	2.09416	0.0505756	0.434632	4.89881	WP_051241779.1	WP_051241779.1	1622
28.9676	28.7391	29.085	28.9364	28.7392	28.8359						40	40	40	62.3	62.3	62.3	60.874	0	312.59	2030200000	284	0.330319	0.624368	0.0933965	0.802196	WP_051241800.1	WP_051241800.1	1627
23.5777	21.3513	22.9207	23.6389	23.1893	23.0956						2	2	2	10.5	10.5	10.5	37.854	0	9.2833	40063000	11	0.434539	0.541627	-0.691356	-1.01461	WP_051241820.1	WP_051241820.1	1629
22.2572	22.9661	22.1275	22.2068	21.8637	21.9409						4	4	4	10.3	10.3	10.3	41.251	0	19.601	13512000	12	0.728738	0.361956	0.446459	1.59131	WP_051241823.1	WP_051241823.1	1630
21.9534	21.6897	22.5585	22.2892	22.7575	23.2768						9	9	9	27.5	27.5	27.5	50.436	0	52.032	40434000	19	0.856027	0.295454	-0.707336	-1.8418	WP_051241961.1	WP_051241961.1	1635
29.547	29.7478	27.4519	22.9749	22.0642	22.2717				+	LFQ intensity 2AEP_LFQ intensity NH3	8	8	8	15	15	15	46.207	0	58.693	847000000	38	2.93148	0.0153757	6.47865	8.26211	WP_051241968.1	WP_051241968.1	1636
22.5593	22.5033	22.5816	22.8735	22.9381	22.9427				+	LFQ intensity 2AEP_LFQ intensity NH3	3	3	3	13.8	13.8	13.8	36.072	0	11.448	24269000	11	3.48084	0.00822155	-0.370054	-11.4635	WP_051241981.1	WP_051241981.1	1637
24.115	23.5914	23.2728	24.6117	24.7752	24.7471						8	8	8	39.4	39.4	39.4	26.03	0	40.976	109800000	44	1.8619	0.0722902	-1.05161	-4.19568	WP_051241989.1	WP_051241989.1	1638
21.5975	21.3923	22.829	23.7152	22.44	23.518						6	6	6	20.5	20.5	20.5	46.004	0	21.972	29710000	19	1.00711	0.242065	-1.28483	-2.14641	WP_051242016.1	WP_051242016.1	1642
25.4526	25.6057	26.149	21.6386	22.3617	22.7301				+	LFQ intensity 2AEP_LFQ intensity NH3	12	12	12	66.4	66.4	66.4	30.614	0	96.656	51033000	34	3.09143	0.0129395	3.49234	9.09583	WP_051242018.1	WP_051242018.1	1643
25.7142	25.6914	25.586	25.8772	25.754	25.72						9	9	9	36	36	36	42.837	0	188.17	236790000	47	0.902787	0.279137	-0.119902	-1.93505	WP_051242028.1	WP_051242028.1	1646
22.0046	21.344	23.0545	23.9641	24.4628	24.1856						4	4	4	24.9	24.9	24.9	25.469	0	58.181	56970000	14	1.78947	0.0796224	-2.0698	-3.992	WP_051242069.1	WP_051242069.1	1649
22.2953	21.9867	22.619	25.1561	24.8276	25.2217				+	LFQ intensity 2AEP_LFQ intensity NH3	11	11	11	55.1	55.1	55.1	29.833	0	127.29	99126000	21	3.6427	0.00669826	-2.76815	-12.61	WP_051242070.1	WP_051242070.1	1650
26.6518	26.7414	26.6444	26.8841	26.9543	26.9937				+	LFQ intensity 2AEP_LFQ intensity NH3	12	12	12	31.8	31.8	31.8	60.421	0	202.01	521280000	105	2.39134	0.0331423	-0.264805	-5.9267	WP_051242072.1	WP_051242072.1	1651
27.2425	27.0285	27.4986	27.745	27.5003	27.5981						14	14	14	53.6	53.6	53.6	41.116	0	240.44	796210000	118	1.09729	0.209276	-0.357908	-2.33368	WP_051242081.1	WP_051242081.1	1653
25.4301	25.5217	25.5277	21.7972	22.7411	21.2751				+	LFQ intensity 2AEP_LFQ intensity NH3	10	10	10	34.6	34.6	34.6	47.76	0	24.334	53537000	22	2.93205	0.0153757	3.55538	8.26496	WP_051242085.1	WP_051242085.1	1654
24.7916	24.0133	25.1133	24.3496	24.0537	24.7644						8	8	8	62.5	62.5	62.5	17.77	0	38.168	93363000	38	0.257757	0.693905	0.250155	0.647857	WP_051242109.1	WP_051242109.1	1656
25.0214	25.3771	25.1242	24.871	25.0945	24.4239						8	8	8	29.9	29.9	29.9	50.336	0	60.915	121460000	36	0.77845	0.333701	0.377721	1.68867	WP_051242138.1	WP_051242138.1	1660
21.6414	21.9615	23.6291	22.014	20.5853	20.5958						4	4	4	24.3	24.3	24.3	29.079	0	26.907	3474300	9	0.799619	0.32481	1.34566	1.73029	WP_051242140.1	WP_051242140.1	1661
22.3509	22.5237	21.2417	22.67	22.5886	21.4537						6	6	6	19.3	19.3	19.3	52.258	0	20.188	18755000	19	0.129958	0.840634	-0.198683	-0.353754	WP_051242153.1	WP_051242153.1	1663
21.1783	23.8653	22.8953	24.0361	24.0472	23.8197						10	10	10	25.3	25.3	25.3	49.007	0	18.386	59703000	31	0.771238	0.337474	-1.32133	-1.67452	WP_051242199.1	WP_051242199.1	1670
25.5529	25.3861	25.3969	25.9249	25.8995	25.6771						18	18	18	65.6	65.6	65.6	40.033	0	91.748	237730000	82	1.81872	0.0777249	-0.38851	-4.0734	WP_051242205.1	WP_051242205.1	1671
22.6192	22.1064	21.4262	23.122	23.2814	23.514						6	6	6	29.8	29.8	29.8	31.517	0	41.144	32426000	17	1.58434	0.105869	-1.2552	-3.45056	WP_051242240.1	WP_051242240.1	1674
25.2398	24.3404	25.8907	25.949	25.8306	26.2273						14	14	14	61.9	61.9	61.9	29.192	0	37.701	248170000	72	0.844824	0.299279	-0.845324	-1.81958	WP_051242255.1	WP_051242255.1	1676
24.2758	22.7094	23.3213	25.2971	24.8082	25.1322						9	9	9	32.5	32.5	32.5	45.401	0	98.002	118160000	36	1.57998	0.106165	-1.64365	-3.43958	WP_051242266.1	WP_051242266.1	1679
24.4677	24.2461	24.7407	24.8463	25.0896	24.9519						8	8	8	43.5	43.5	43.5	23.968	0	33.774	125720000	46	1.39713	0.139726	-0.477771	-2.99665	WP_051242273.1	WP_051242273.1	1680
28.3086	28.2374	28.3254	29.0146	28.7667	28.8242				+	LFQ intensity 2AEP_LFQ intensity NH3	33	33	33	77.2	77.2	77.2	43.751	0	323.31	1826700000	207	2.71861	0.0205493	-0.577981	-7.25995	WP_051242319.1	WP_051242319.1	1683
22.6516	21.3044	22.4701	25.355	24.9961	25.2092				+	LFQ intensity 2AEP_LFQ intensity NH3	14	14	14	45.1	45.1	45.1	42.934	0	44.166	108010000	36	2.6599	0.0220405	-3.04474	-7.00328	WP_051242322.1	WP_051242322.1	1684
25.0144	25.5168	22.514	24.8469	24.9104	24.4558						8	8	8	33.5	33.5	33.5	43.811	0	55.496	128470000	31	0.155008	0.815009	-0.389308	-0.414417	WP_051242349.1	WP_051242349.1	1687
22.7222	22.7997	22.4694	24.5656	24.6975	21.8446						6	6	6	24.4	24.4	24.4	39.9	0	10.572	60856000	10	0.482984	0.512075	-1.03885	-1.11096	WP_051242377.1	WP_051242377.1	1690
24.6923	24.5653	21.945	24.1885	24.0593	23.7351						10	10	10	20.2	20.2	20.2	82.093	0	26.707	82564000	40	0.103357	0.875964	-0.260059	-0.287217	WP_051242383.1	WP_051242383.1	1692
22.6984	22.4959	22.6179	22.5725	22.6676	23.0299						6	6	6	34.7	34.7	34.7	23.516	0	18.183	27695000	25	0.431447	0.544014	-0.152533	-1.00842	WP_051242407.1	WP_051242407.1	1694
24.6571	24.0404	24.8901	24.4563	24.3949	24.7088						6	6	6	39	39	39	16.962	0	133.05	100200000	34	0.0112119	0.988663	0.00921313	0.0339894	WP_051242410.1	WP_051242410.1	1695
21.3786	21.3195	23.5299	23.5118	21.0769	23.6914						6	6	6	23.4	23.4	23.4	42.677	0	48.266	27023000	24	0.242455	0.710794	-0.684032	-0.61437	WP_051242427.1	WP_051242427.1	1699
24.4026	23.9339	24.8336	25.1072	25.0694	25.1643						10	10	10	47.2	47.2	47.2	27.472	0	56.657	132190000	56	1.298	0.161756	-0.723571	-2.76963	WP_051242437.1	WP_051242437.1	1701
25.8439	25.8546	26.2179	25.0304	25.2729	25.5354						10	10	10	58.3	58.3	58.3	25.823	0	43.904	187130000	62	1.6551	0.0960675	0.692627	3.63174	WP_051242442.1	WP_051242442.1	1702
22.7224	23.4018	21.9623	23.6017	22.7778	22.1516						5	5	5	25.2	25.2	25.2	30.238	0	15.623	33261000	21	0.089202	0.889514	-0.148202	-0.250799	WP_051242457.1	WP_051242457.1	1705
21.0721	22.5963	23.2585	22.7202	22.7584	23.1446						2	2	2	21.1	21.1	21.1	13.411	0	3.9094	20733000	10	0.355814	0.601981	-0.565435	-0.854991	WP_051242514.1	WP_051242514.1	1708
25.6353	25.8848	25.0922	25.4379	25.2904	25.3418						16	16	16	33.3	33.3	33.3	69.266	0	43.519	199730000	78	0.309944	0.64411	0.180699	0.759518	WP_051242545.1	WP_051242545.1	1714
24.956	24.9186	24.9801	24.5014	23.9737	24.0126						10	10	10	37.7	37.7	37.7	38.282	0	48.059	97720000	55	2.00575	0.0586854	0.789028	4.62171	WP_051242576.1	WP_051242576.1	1719
26.1492	25.8908	24.1932	26.1494	25.6762	25.6782						19	19	19	47.3	47.3	47.3	61.749	0	79.806	253170000	74	0.267377	0.684851	-0.423541	-0.668724	WP_051242591.1	WP_051242591.1	1720
24.1724	24.0488	24.8921	25.6265	25.3696	25.8112						10	10	10	52.2	52.2	52.2	21.008	0	37.393	177140000	51	1.8671	0.0722902	-1.23135	-4.21057	WP_051242608.1	WP_051242608.1	1722
24.0913	24.5961	23.0724	24.5736	24.8237	25.0229						13	13	13	19.3	19.3	19.3	91.714	0	23.969	111990000	47	0.885608	0.285124	-0.886803	-1.9007	WP_051242620.1	WP_051242620.1	1723
20.6657	22.9621	22.5213	24.307	24.4063	24.4921						4	4	4	32.5	32.5	32.5	16.46	0	9.451	72803000	22	1.53736	0.113033	-2.35208	-3.33329	WP_051242631.1	WP_051242631.1	1724
21.8719	21.7152	23.4561	23.5546	23.3302	23.3129						5	5	5	43	43	43	20.683	0	48.215	33291000	22	0.871584	0.288551	-1.05145	-1.87274	WP_051242633.1	WP_051242633.1	1725
23.6342	24.2122	22.6175	24.0659	23.3554	23.473						9	9	9	23.8	23.8	23.8	56.814	0	60.051	60458000	30	0.0998614	0.880419	-0.143424	-0.278292	WP_051242647.1	WP_051242647.1	1726
22.4019	22.5851	22.0514	22.2061	22.3404	22.7223						3	3	3	9.1	9.1	9.1	28.978	0	7.7932	18920000	10	0.128021	0.843537	-0.0767975	-0.348985	WP_051242666.1	WP_051242666.1	1727
23.286	23.0146	22.9429	25.8488	25.4346	24.8469				+	LFQ intensity 2AEP_LFQ intensity NH3	13	13	13	40.5	40.5	40.5	59.465	0	82.612	147000000	41	2.75704	0.0199608	-2.2956	-7.43239	WP_051242679.1	WP_051242679.1	1728
22.1139	22.1898	22.3447	24.2339	24.4932	21.6168						7	7	7	35.6	35.6	35.6	36.165	0	25.965	48036000	13	0.59841	0.436719	-1.23182	-1.33728	WP_051242683.1	WP_051242683.1	1729
26.0017	26.0245	25.4513	27.8051	27.3258	27.3709				+	LFQ intensity 2AEP_LFQ intensity NH3	22	22	22	47.4	47.4	47.4	65.483	0	105.52	630850000	126	2.64189	0.0225672	-1.67476	-6.92616	WP_051242685.1	WP_051242685.1	1730
24.9496	24.6366	22.1019	26.017	25.9603	26.1223						12	12	12	50.6	50.6	50.6	28.887	0	49.313	228860000	54	1.11315	0.205472	-2.13714	-2.36711	WP_051242689.1	WP_051242689.1	1731
22.3243	22.0688	22.8618	22.2961	22.859	22.6613						4	4	4	15.1	15.1	15.1	48.404	0	24.449	31788000	8	0.260718	0.690734	-0.187133	-0.654294	WP_051242699.1	WP_051242699.1	1732
27.6767	27.6397	27.6812	26.0803	25.9687	26.1814				+	LFQ intensity 2AEP_LFQ intensity NH3	14	14	14	52.1	52.1	52.1	36.26	0	149.17	366480000	90	4.83854	0.00180158	1.58907	25.2957	WP_051242701.1	WP_051242701.1	1733
24.9163	24.9393	25.0523	25.2844	25.0297	24.973						10	10	10	44.2	44.2	44.2	36.718	0	100.84	161510000	61	0.532766	0.476527	-0.126421	-1.20897	WP_051242703.1	WP_051242703.1	1734
22.4797	22.8317	22.8579	22.8375	22.8421	22.822						5	5	5	29.1	29.1	29.1	21.602	0	7.8619	28247000	19	0.381321	0.582261	-0.110765	-0.907217	WP_051242711.1	WP_051242711.1	1736
22.6269	22.3542	22.9324	22.4472	22.3144	22.5991						3	3	3	6.4	6.4	6.4	53.76	0	10.41	23407000	12	0.422097	0.550734	0.184251	0.989672	WP_051242714.1	WP_051242714.1	1737
28.3823	28.4626	27.9123	25.143	24.4858	24.4911				+	LFQ intensity 2AEP_LFQ intensity NH3	17	17	17	46.8	46.8	46.8	57.328	0	138.74	453950000	96	3.66455	0.00654163	3.54574	12.7729	WP_051242723.1	WP_051242723.1	1739
27.3393	27.7532	27.113	27.9691	28.0741	28.2603						14	14	14	59.9	59.9	59.9	31.436	0	54.89	1030500000	108	1.56304	0.109206	-0.69935	-3.3971	WP_051242728.1	WP_051242728.1	1740
25.8404	24.843	22.4007	25.9911	25.9966	25.8808						9	9	9	30.7	30.7	30.7	52.841	0	40.013	249730000	35	0.712589	0.36916	-1.59478	-1.55978	WP_051242782.1	WP_051242782.1	1744
25.0431	24.7276	24.9964	24.8669	25.3293	25.1242						6	6	6	31.1	31.1	31.1	26.941	0	48.908	153230000	34	0.483034	0.512075	-0.184426	-1.11106	WP_051242790.1	WP_051242790.1	1745
24.6048	24.4207	23.9474	24.0626	23.8496	23.7315						5	5	5	22.2	22.2	22.2	36.351	0	17.307	81057000	30	0.949155	0.262942	0.443102	2.02837	WP_051242865.1	WP_051242865.1	1752
23.5624	22.5043	22.7079	24.1017	23.6466	23.8234						5	5	5	22.9	22.9	22.9	21.425	0	10.437	52877000	18	1.24992	0.170293	-0.932341	-2.66249	WP_051242893.1	WP_051242893.1	1754
24.0579	23.7995	22.5093	24.3714	23.7142	24.0637						9	9	9	42.4	42.4	42.4	36.235	0	33.904	72397000	51	0.504429	0.495688	-0.594209	-1.15328	WP_051242904.1	WP_051242904.1	1756
24.7054	24.6318	24.9911	25.1681	24.7904	25.0239						7	7	7	34.9	34.9	34.9	34.63	0	20.661	147990000	38	0.632609	0.416473	-0.218005	-1.40392	WP_051242921.1	WP_051242921.1	1758
24.258	21.3762	22.1012	24.0988	23.661	23.3541						12	12	12	36.4	36.4	36.4	47.074	0	34.105	58312000	36	0.560088	0.460869	-1.12617	-1.26247	WP_051242925.1	WP_051242925.1	1759
23.2828	21.0241	22.7684	23.6464	23.4435	22.8517						7	7	7	22.9	22.9	22.9	47.811	0	16.416	40012000	23	0.589512	0.441925	-0.955449	-1.31993	WP_051242931.1	WP_051242931.1	1760
22.5607	22.5364	22.2547	23.0013	23.1668	22.9706				+	LFQ intensity 2AEP_LFQ intensity NH3	5	5	5	16.9	16.9	16.9	34.125	0	5.1196	24884000	14	2.17229	0.0444907	-0.595637	-5.15411	WP_051242976.1	WP_051242976.1	1762
24.2095	23.9548	24.2582	24.4221	24.1499	24.467						8	8	8	22.2	22.2	22.2	71.051	0	23.809	88756000	27	0.683973	0.38835	-0.205469	-1.50397	WP_084649799.1	WP_084649799.1	1766
23.3689	23.837	21.2509	23.8924	22.3731	22.6642						8	8	8	38.8	38.8	38.8	35.467	0	12.696	55807000	24	0.059216	0.923766	-0.15761	-0.170984	WP_084649809.1	WP_084649809.1	1768
25.0718	24.8381	22.8898	23.1661	21.3864	22.7445						9	9	9	32.2	32.2	32.2	44.333	0	31.676	36851000	28	0.981843	0.251643	1.83424	2.09475	WP_084649814.1	WP_084649814.1	1770
21.5774	22.7722	23.5838	22.6284	22.4452	22.4972						8	8	8	8.1	8.1	8.1	134.12	0	77.829	21838000	19	0.0723562	0.911776	0.120818	0.206436	WP_084649820.1	WP_084649820.1	1771
24.877	24.683	24.7024	24.4271	24.2998	24.245				+	LFQ intensity 2AEP_LFQ intensity NH3	17	17	17	40.2	40.2	40.2	56.519	0	62.377	96394000	56	2.20074	0.0429399	0.430135	5.24961	WP_084649824.1	WP_084649824.1	1773
24.4114	24.2528	22.7997	23.9491	24.0099	23.5487						18	18	18	28.2	28.2	28.2	72.321	0	37.758	67674000	62	0.00901829	0.990076	-0.0146039	-0.027406	WP_084649830.1	WP_084649830.1	1776
28.3188	28.3509	28.4597	27.9522	27.7948	27.6657				+	LFQ intensity 2AEP_LFQ intensity NH3	25	25	25	65.9	65.9	65.9	49.578	0	313.11	1036500000	197	2.44857	0.0299111	0.572239	6.14347	WP_084649832.1	WP_084649832.1	1777
24.2409	19.9149	22.5595	24.0388	24.3546	24.9101						8	8	8	33.9	33.9	33.9	40.35	0	37.24	80591000	40	0.789091	0.329385	-2.19609	-1.70958	WP_084649833.1	WP_084649833.1	1778
22.935	21.8598	22.8771	23.5843	23.3605	23.2798						8	8	8	25.3	25.3	25.3	42.237	0	10.251	39200000	21	1.109	0.205476	-0.850928	-2.35834	WP_084649841.1	WP_084649841.1	1779
24.2179	21.2402	23.3708	24.6418	24.6357	24.7575						7	7	7	31.5	31.5	31.5	39.684	0	17.131	92589000	23	0.913801	0.27489	-1.73535	-1.95713	WP_084649843.1	WP_084649843.1	1781
22.8981	22.9369	22.7707	23.7719	23.389	23.6909				+	LFQ intensity 2AEP_LFQ intensity NH3	11	11	11	34.2	34.2	34.2	25.882	0	56.981	46620000	29	2.38477	0.0334033	-0.748722	-5.90225	WP_084649847.1	WP_084649847.1	1782
25.2655	25.172	25.8229	25.5319	25.6772	25.9951						9	9	9	52.2	52.2	52.2	20.094	0	48.292	229560000	47	0.571328	0.455561	-0.314583	-1.28444	WP_084649851.1	WP_084649851.1	1783
22.939	22.2799	21.699	24.7757	21.7197	24.7133						5	5	5	26.8	26.8	26.8	30.208	0	9.1781	59952000	10	0.598007	0.436719	-1.43029	-1.3365	WP_084649852.1	WP_084649852.1	1784
25.2703	25.5323	22.9472	22.7672	22.4366	21.6287						4	4	4	10.2	10.2	10.2	43.274	0	12.387	46478000	21	1.21945	0.178342	2.30579	2.59552	WP_084649853.1	WP_084649853.1	1785
24.0509	24.172	22.6488	23.7981	23.5916	22.2468						5	5	5	12.7	12.7	12.7	81.534	0	22.82	49553000	18	0.23464	0.717687	0.411742	0.597117	WP_084649854.1	WP_084649854.1	1786
21.2527	21.884	23.8701	22.0284	25.233	24.9168						7	7	7	39	39	39	30.923	0	43.344	76073000	21	0.598444	0.436719	-1.72383	-1.33735	WP_084649861.1	WP_084649861.1	1791
23.9051	21.0768	22.8854	23.5554	23.5279	23.631						6	6	6	19	19	19	37.954	0	6.9171	46454000	18	0.501124	0.498063	-0.948996	-1.14677	WP_084649862.1	WP_084649862.1	1792
24.9593	25.0831	26.0937	28.9761	28.9232	29.2381				+	LFQ intensity 2AEP_LFQ intensity NH3	14	14	14	66.2	66.2	66.2	27.812	0	88.968	1584200000	121	3.22516	0.0109131	-3.6671	-9.85177	WP_084649866.1	WP_084649866.1	1794
23.3619	22.2052	21.7406	26.2166	25.9871	25.9369				+	LFQ intensity 2AEP_LFQ intensity NH3	11	11	11	32.4	32.4	32.4	52.673	0	63.424	192470000	41	2.74424	0.0199791	-3.61098	-7.37455	WP_084649867.1	WP_084649867.1	1795
22.1898	22.93	23.0362	23.1035	22.9321	23.1094						7	7	7	13.8	13.8	13.8	49.164	0	10.637	31863000	20	0.533197	0.476527	-0.329645	-1.20982	WP_084649869.1	WP_084649869.1	1796
21.9782	22.7481	22.4311	24.1116	23.8541	23.9865				+	LFQ intensity 2AEP_LFQ intensity NH3	6	6	6	18.3	18.3	18.3	55.051	0	14.419	49846000	22	2.60919	0.0237024	-1.59826	-6.78805	WP_084649872.1	WP_084649872.1	1797
26.9268	26.6158	25.6091	29.191	29.2028	29.0491				+	LFQ intensity 2AEP_LFQ intensity NH3	29	29	29	65.8	65.8	65.8	53.852	0	323.31	1840800000	210	2.63493	0.0227305	-2.7637	-6.89657	WP_084649873.1	WP_084649873.1	1798
24.3879	21.4225	24.8012	23.6189	24.1001	22.0342						9	9	9	31.5	31.5	31.5	58.224	0	27.922	65063000	21	0.082004	0.899544	0.286172	0.231985	WP_084649876.1	WP_084649876.1	1801
24.1	23.9197	24.2589	22.3933	21.8393	23.4785						6	6	6	19.1	19.1	19.1	50.401	0	15.145	26493000	26	1.44065	0.131595	1.52251	3.09908	WP_084649881.1	WP_084649881.1	1802
27.3935	27.6355	27.4605	27.2488	27.6829	27.2277						57	57	57	41.5	41.5	41.5	194.65	0	228.24	720720000	230	0.266594	0.68531	0.110031	0.66703	WP_084649883.1	WP_084649883.1	1803
29.3194	29.2188	28.9822	21.7162	21.6268	21.6953				+	LFQ intensity 2AEP_LFQ intensity NH3	14	14	14	50	50	50	42.787	0	104.5	770590000	75	6.66092	0.000244076	7.49401	72.3817	WP_084649887.1	WP_084649887.1	1804
23.4595	23.6727	22.4307	22.9221	23.2387	21.4817						3	3	3	5.6	5.6	5.6	77.943	0	12.842	33078000	7	0.41023	0.558769	0.640168	0.965793	WP_084649891.1	WP_084649891.1	1806
22.2106	21.8792	21.3706	23.1977	23.2542	22.597						5	5	5	9.4	9.4	9.4	60.656	0	8.6592	17535000	8	1.6853	0.0934206	-1.19613	-3.71081	WP_084649897.1	WP_084649897.1	1809
23.5052	23.6742	23.8799	23.7413	23.8965	24.0155						7	7	7	27.2	27.2	27.2	27.438	0	18.838	62860000	33	0.668722	0.396901	-0.198022	-1.47425	WP_084649902.1	WP_084649902.1	1811
22.1435	21.5246	23.5129	24.3749	26.8567	26.6907						11	11	11	34.8	34.8	34.8	38.991	0	59.538	225560000	35	1.64458	0.0971875	-3.58048	-3.60444	WP_084649908.1	WP_084649908.1	1812
25.5893	25.6137	25.7102	26.372	26.1185	26.2936				+	LFQ intensity 2AEP_LFQ intensity NH3	15	15	15	60.4	60.4	60.4	34.434	0	80.329	310400000	69	2.76433	0.0198307	-0.623607	-7.46553	WP_084649911.1	WP_084649911.1	1814
22.8941	22.8591	23.5141	23.4682	23.1299	24.0723						4	4	4	21.1	21.1	21.1	19.478	0	20.821	44229000	21	0.601511	0.436719	-0.467713	-1.34333	WP_084649918.1	WP_084649918.1	1818
21.4324	21.5143	22.5866	22.56	22.3564	22.1228						6	6	6	19.3	19.3	19.3	47.793	0	25.952	14484000	23	0.568149	0.455805	-0.501947	-1.27823	WP_084649928.1	WP_084649928.1	1823
21.3466	23.9052	22.4442	23.7033	23.5007	23.7309						8	8	8	23.1	23.1	23.1	56.746	0	17.231	49180000	26	0.65623	0.402814	-1.07964	-1.44992	WP_084649945.1	WP_084649945.1	1826
21.8116	22.0098	22.7627	21.3043	23.2966	23.3412						6	6	6	33.5	33.5	33.5	28.87	0	14.76	37228000	17	0.244506	0.709022	-0.452691	-0.618879	WP_084649955.1	WP_084649955.1	1831
23.5037	21.5949	22.795	22.2451	23.3823	23.8673						6	6	6	20.6	20.6	20.6	53.499	0	26.438	40381000	24	0.29376	0.661741	-0.533678	-0.725276	WP_084649961.1	WP_084649961.1	1835
24.836	24.8831	24.8223	24.8705	24.7586	24.9036						18	18	18	33.9	33.9	33.9	76.33	0	59.702	124230000	84	0.0205643	0.97319	0.00293605	0.0617124	WP_084649966.1	WP_084649966.1	1837
23.3572	23.266	22.2113	23.36	23.2442	23.4029						8	8	8	11.2	11.2	11.2	96.051	0	22.681	40251000	30	0.454398	0.528512	-0.390855	-1.05425	WP_084649997.1	WP_084649997.1	1846
21.8645	21.7895	22.2899	21.7386	21.7986	21.9211						2	2	2	6.4	6.4	6.4	28.233	0.00060753	2.3688	8387800	6	0.418462	0.55111	0.161878	0.982368	WP_084650021.1	WP_084650021.1	1853
23.2714	22.9851	23.1034	22.9008	22.6056	22.7695						9	9	9	20.4	20.4	20.4	65.882	0	24.256	33102000	26	1.41266	0.13637	0.361334	3.033	WP_084650023.1	WP_084650023.1	1854
21.7854	21.9168	22.2873	23.6799	24.4404	24.3995				+	LFQ intensity 2AEP_LFQ intensity NH3	3	3	3	26.6	26.6	26.6	20.828	0	12.82	60407000	16	2.77842	0.0195678	-2.17676	-7.52988	WP_084650031.1	WP_084650031.1	1855
22.8272	22.5017	22.2601	22.2649	21.5616	21.4363						3	3	3	8.9	8.9	8.9	54.099	0	14.304	11765000	11	1.19204	0.18367	0.775393	2.53587	WP_084650034.1	WP_084650034.1	1856
22.5655	22.0671	23.4396	27.2887	27.1006	27.1344				+	LFQ intensity 2AEP_LFQ intensity NH3	16	16	16	61	61	61	32.624	0	203.07	437220000	85	3.42069	0.00855203	-4.48382	-11.0634	WP_084650043.1	WP_084650043.1	1857
22.0965	21.642	21.9194	22.2699	22.6502	23.0929						4	4	4	16.1	16.1	16.1	26.342	0	19.832	23756000	14	1.34881	0.149975	-0.78505	-2.88493	WP_084650056.1	WP_084650056.1	1858
22.813	21.6177	23.7562	24.1572	24.6962	24.8152						7	7	7	49.4	49.4	49.4	18.196	0	87.691	74214000	25	1.31441	0.157113	-1.82722	-2.80663	WP_084650063.1	WP_084650063.1	1860
26.4221	26.4953	26.8453	26.3953	26.5485	26.4051						11	11	11	28.7	28.7	28.7	55.854	0	66.887	408960000	77	0.421009	0.550734	0.137917	0.987487	WP_084650118.1	WP_084650118.1	1867
23.0303	22.5416	22.2174	23.219	21.7765	23.7701						3	3	3	36.4	36.4	36.4	14.35	0	6.7857	28733000	9	0.195406	0.761499	-0.325441	-0.508808	WP_084650132.1	WP_084650132.1	1871
24.6809	22.5476	22.8994	25.2763	25.4969	25.5214						5	5	5	43.7	43.7	43.7	23.717	0	26.779	150050000	29	1.43746	0.132138	-2.05556	-3.0915	WP_084650134.1	WP_084650134.1	1872
24.815	23.0006	24.8422	21.4178	24.3728	24.3926						11	11	11	50	50	50	33.963	0	23.799	68400000	35	0.286781	0.669295	0.824849	0.710407	WP_084650148.1	WP_084650148.1	1875
23.6085	23.1121	22.3424	24.1092	24.1425	21.2999						5	5	5	33.8	33.8	33.8	16.71	0	7.8964	41780000	15	0.055566	0.927735	-0.162843	-0.160995	WP_084650155.1	WP_084650155.1	1876
23.0343	23.1072	21.9129	23.0605	21.3509	22.6379						5	5	5	14.8	14.8	14.8	44.184	0	5.772	22915000	13	0.200684	0.756308	0.335019	0.520867	WP_084650163.1	WP_084650163.1	1878
25.553	25.7773	25.1236	26.3931	26.831	26.3073						20	20	20	33.1	33.1	33.1	86.656	0	102.2	342120000	89	1.82265	0.0775053	-1.02584	-4.08444	WP_084650165.1	WP_084650165.1	1879
25.166	25.3519	24.7303	25.2471	25.4058	25.1476						19	19	19	37.9	37.9	37.9	80.26	0	62.069	155250000	71	0.390334	0.576808	-0.184149	-0.925544	WP_084650193.1	WP_084650193.1	1881
24.938	25.4915	23.2502	24.3227	24.6859	24.1583						6	6	6	11.4	11.4	11.4	87.267	0	26.667	101590000	28	0.087774	0.890267	0.170942	0.247083	WP_084650211.1	WP_084650211.1	1883
24.7556	24.5761	22.5078	25.5426	25.5957	25.3314						10	10	10	34.4	34.4	34.4	40.243	0	62.166	168480000	43	0.997482	0.244457	-1.5434	-2.12669	WP_084650213.1	WP_084650213.1	1884
25.9575	25.448	25.9051	25.9328	25.467	25.905						10	10	10	37.4	37.4	37.4	32.184	0	26.579	246990000	57	0.00282114	0.995306	0.00190989	0.00863329	WP_084650219.1	WP_084650219.1	1885
25.4108	25.4306	23.4777	25.6638	25.683	25.5945						15	15	14	33.2	33.2	32	67.579	0	84.061	214920000	63	0.604095	0.43604	-0.874073	-1.34836	WP_084650222.1	WP_084650222.1	1886
24.6434	24.5345	25.1387	25.1793	24.8546	25.0056						5	5	5	45.7	45.7	45.7	13.829	0	24.852	145050000	31	0.50643	0.494108	-0.241015	-1.15722	WP_084650244.1	WP_084650244.1	1888
27.7102	28.1043	27.0622	28.0716	27.9196	28.0133						20	20	20	52.7	52.7	52.7	53.578	0	310.33	1098700000	137	0.540712	0.473361	-0.375949	-1.22455	WP_084650260.1	WP_084650260.1	1889
21.8413	22.9899	22.0691	25.5581	25.3643	25.7612				+	LFQ intensity 2AEP_LFQ intensity NH3	8	8	8	25.7	25.7	25.7	41.099	0	41.351	142200000	28	3.04191	0.013948	-3.26111	-8.82982	WP_084650313.1	WP_084650313.1	1893
25.2814	24.9554	25.5851	24.9121	24.9767	25.0031						17	17	17	33.3	33.3	33.3	70.507	0	60.489	156860000	67	0.777236	0.334036	0.309994	1.68629	WP_084650323.1	WP_084650323.1	1895
22.2546	22.2185	22.675	22.2693	21.6905	22.1568						3	3	3	6.6	6.6	6.6	56.236	0	5.5866	10899000	7	0.679624	0.390946	0.34383	1.49549	WP_084650326.1	WP_084650326.1	1896
23.5587	23.314	23.0169	24.1191	24.943	24.1427						17	17	17	22	22	22	111.26	0	78.397	85770000	40	1.61656	0.10137	-1.10506	-3.53236	WP_084650351.1	WP_084650351.1	1898
22.076	21.1813	22.5132	22.1911	21.8585	21.7097						6	6	6	9.3	9.3	9.3	79.831	0	20.588	11374000	8	0.00294086	0.995306	0.00375239	0.00899843	WP_084650367.1	WP_084650367.1	1899
22.3738	22.6904	23.0479	23.2314	21.1602	20.9498						3	3	3	4.6	4.6	4.6	80.415	0	6.3269	16077000	8	0.541251	0.473361	0.923599	1.2256	WP_084650384.1	WP_084650384.1	1903
22.4337	22.1962	24.028	21.6918	21.8133	21.846						7	7	7	13.9	13.9	13.9	70.724	0	18.643	10354000	16	0.890364	0.284961	1.10224	1.9102	WP_084650417.1	WP_084650417.1	1907
25.3648	25.2419	24.0918	25.0685	24.8401	24.9388						12	12	12	27.8	27.8	27.8	55.688	0	124.32	143400000	47	0.0411258	0.942529	-0.0496324	-0.120833	WP_084650428.1	WP_084650428.1	1909
25.1708	25.3326	23.9917	25.3654	25.3466	25.1712						10	10	10	23.4	23.4	23.4	67.401	0	38.98	173450000	37	0.469056	0.523658	-0.462701	-1.08337	WP_084650455.1	WP_084650455.1	1910

## Sheet: Stappia P source
LFQ intensity 2AEP_1	LFQ intensity 2AEP_2	LFQ intensity 2AEP_3	LFQ intensity P_1	LFQ intensity P_2	LFQ intensity P_3	Only identified by site	Reverse	Potential contaminant	Student's T-test Significant 2AEP P_Pi	Student's T-test significant	Peptides	Razor + unique peptides	Unique peptides	Sequence coverage [%]	Unique + razor sequence coverage [%]	Unique sequence coverage [%]	Mol. weight [kDa]	Q-value	Score	Intensity	MS/MS count	-Log Student's T-test p-value 2AEP P_Pi	Student's T-test q-value 2AEP P_Pi	Student's T-test Difference 2AEP P_Pi	Student's T-test Test statistic 2AEP P_Pi	Protein IDs	Majority protein IDs	id
#!{Type}E	E	E	E	E	E	C	C	C	C	C	N	N	N	N	N	N	N	N	N	N	N	N	N	N	N	T	T	T
#!{C:Group1}2AEP P	2AEP P	2AEP P	Pi	Pi	Pi
23.7299	23.4094	23.3365	22.4029	23.0655	23.1503						7	7	7	88.9	88.9	88.9	8.3557	0	96.302	791590000	48	1.09666	0.183816	0.619006	1.69405	WP_013653834.1	WP_013653834.1	4420
22.4981	22.1827	23.1293	22.5786	22.838	23.0398						15	15	15	27.3	27.3	27.3	91.408	0.94176	-3.3782	508800000	27	0.280961	0.675306	-0.215421	-0.527161	WP_029056745.1	WP_029056745.1	4425
19.7895	19.4116	20.1614	20.9913	20.6961	20.5095						14	14	14	40.2	40.2	40.2	41.501	0	28.706	170070000	34	1.66709	0.107268	-0.944818	-2.63964	WP_029056770.1	WP_029056770.1	4438
21.6759	21.7381	21.5808	21.7772	21.0572	21.8629						12	12	12	41.5	41.5	41.5	35.16	0	41.256	225630000	42	0.141504	0.833197	0.0991344	0.275712	WP_029056772.1	WP_029056772.1	4439
22.8675	21.8591	20.3125	24.4045	25.1919	25.129						19	19	19	65.1	65.1	65.1	34.941	0	102.9	3344000000	122	1.83327	0.0701579	-3.22877	-3.64932	WP_029056775.1	WP_029056775.1	4441
22.2023	21.6484	22.0122	23.1835	23.6368	23.5452						21	21	21	85.4	85.4	85.4	18.893	0	96.396	1187400000	92	2.66667	0.0671628	-1.50089	-4.78872	WP_029056776.1	WP_029056776.1	4442
22.5303	22.0485	22.5776	22.3035	22.7056	22.9603						23	23	23	69.7	69.7	69.7	31.094	0	165.62	729350000	98	0.458225	0.541453	-0.270982	-0.762909	WP_029056778.1	WP_029056778.1	4443
19.6791	20.0544	18.8457	19.4062	20.8283	20.4255						9	9	9	37.9	37.9	37.9	40.451	0	75.349	157710000	34	0.554997	0.378545	-0.693587	-1.06093	WP_029056780.1	WP_029056780.1	4445
24.7368	23.8624	24.4111	20.1289	23.1351	23.2284						23	23	23	82.9	82.9	82.9	27.634	0	162.34	882980000	160	0.969799	0.140984	2.17261	1.89013	WP_029056783.1	WP_029056783.1	4448
18.9584	19.7835	18.3602	18.6395	20.0523	19.8233						12	12	12	31.1	31.1	31.1	45.635	0	11.654	83916000	25	0.321082	0.589933	-0.470996	-0.671316	WP_029056784.1	WP_029056784.1	4449
22.1758	22.1551	22.0978	22.7785	22.7377	22.5396						29	29	29	67.3	67.3	67.3	41.294	0	101.37	684480000	98	2.66122	0.0869286	-0.542343	-3.05755	WP_029056788.1	WP_029056788.1	4452
21.1672	19.169	20.7804	21.1443	20.8737	21.5559						20	20	20	62.3	62.3	62.3	52.425	0	31.538	295390000	32	0.565683	0.359821	-0.819058	-1.10207	WP_029056796.1	WP_029056796.1	4459
21.2645	19.2263	18.2217	19.8298	20.7392	20.4317						5	5	5	53	53	53	11.215	0	5.8984	147440000	9	0.337195	0.55243	-0.762688	-0.737541	WP_029056797.1	WP_029056797.1	4460
24.6063	24.4968	19.7705	22.67	24.3805	24.1742						21	21	21	92.3	92.3	92.3	21.813	0	113.93	2165400000	151	0.176776	0.724192	-0.783725	-0.439635	WP_029056805.1	WP_029056805.1	4462
22.9455	22.5409	23.1395	23.3217	23.828	23.5078						46	46	46	84.7	84.7	84.7	59.858	0	263.22	1384000000	148	1.37399	0.1188	-0.677207	-2.05141	WP_029056806.1	WP_029056806.1	4463
21.8122	20.8644	22.082	22.2485	22.9167	23.0374						19	19	19	57.5	57.5	57.5	31.175	0	80.847	791020000	67	1.21679	0.115655	-1.14801	-2.11304	WP_029056813.1	WP_029056813.1	4467
18.8901	19.5043	19.1016	19.6186	18.2623	18.6776						8	8	8	47.2	47.2	47.2	18.254	0	24.404	34639000	15	0.286835	0.652379	0.312501	0.5789	WP_029056814.1	WP_029056814.1	4468
19.2174	19.4576	20.0791	20.3412	21.1484	20.6882						13	13	13	40.5	40.5	40.5	39.51	0	22.257	205080000	29	1.51832	0.10787	-1.14121	-2.55163	WP_029056816.1	WP_029056816.1	4470
21.7599	21.8328	22.2161	19.7379	20.6525	20.6718						44	39	39	59.3	57.3	57.3	83.266	0	37.232	234870000	60	2.02008	0.0685432	1.58215	3.60321	WP_029056817.1	WP_029056817.1	4471
21.6988	19.6593	19.156	20.5955	20.6687	20.6873						13	13	13	55.2	55.2	55.2	26.046	0	28.656	158860000	27	0.243184	0.668377	-0.479176	-0.545811	WP_029056820.1	WP_029056820.1	4473
20.6071	19.3222	18.6241	21.0244	21.364	21.2225						13	13	13	60.8	60.8	60.8	28.623	0	23.371	255540000	28	1.33877	0.105858	-1.68582	-2.44661	WP_029056821.1	WP_029056821.1	4474
21.8036	21.2232	21.2485	21.1875	22.4791	22.2419						18	18	18	40.6	40.6	40.6	26.858	0	37.416	490110000	60	0.547429	0.403003	-0.54438	-1.00843	WP_029056823.1	WP_029056823.1	4476
19.9574	19.0159	20.2624	19.1904	20.2722	20.4277						35	35	35	47.2	47.2	47.2	82.328	0	22.447	126850000	40	0.150509	0.790592	-0.218171	-0.34063	WP_029056825.1	WP_029056825.1	4478
21.2792	20.3826	18.8061	20.0707	20.4963	20.8132						6	6	6	68.7	68.7	68.7	14.844	0	15.169	166320000	24	0.150355	0.78164	-0.304148	-0.35607	WP_029056826.1	WP_029056826.1	4479
24.2898	24.0799	23.6644	23.4065	23.9035	24.0055						23	23	23	73.9	73.9	73.9	22.857	0	72.307	1441700000	142	0.386874	0.596575	0.239514	0.663912	WP_029056827.1	WP_029056827.1	4480
22.8431	22.4545	22.8467	23.0351	22.8925	22.8832						19	19	19	55.6	55.6	55.6	37.396	0	135.23	842420000	88	0.731814	0.436746	-0.222209	-0.929305	WP_029056833.1	WP_029056833.1	4486
22.4234	19.8785	21.9573	20.8088	22.6117	23.5946						30	30	30	83.9	83.9	83.9	41.32	0	52.662	793470000	64	0.335417	0.547392	-0.91862	-0.746732	WP_029056834.1	WP_029056834.1	4487
23.3975	23.3005	23.4625	23.6325	23.8255	23.7242						28	28	28	78.2	78.2	78.2	38.069	0	238.14	1590600000	136	2.02038	0.127631	-0.34055	-1.96879	WP_029056836.1	WP_029056836.1	4488
22.0563	18.5084	22.0756	21.3381	21.6493	22.7488						11	11	11	67.8	67.8	67.8	30.015	0	47.108	540360000	54	0.338177	0.541935	-1.03193	-0.758382	WP_029056838.1	WP_029056838.1	4490
23.5758	23.0535	23.1187	22.1969	22.4228	23.1755						18	18	18	85.3	85.3	85.3	19.546	0	146.28	621620000	101	0.897032	0.232557	0.650923	1.48477	WP_029056839.1	WP_029056839.1	4491
21.129	20.6833	19.5974	21.625	22.629	23.179						29	29	29	66.9	66.9	66.9	47.965	0	125.08	668340000	78	1.44986	0.105649	-2.0078	-2.70112	WP_029056840.1	WP_029056840.1	4492
25.9111	25.6848	26.0993	26.3925	26.6733	26.6381						43	43	43	83.3	83.3	83.3	46.775	0	323.31	9847400000	361	1.96509	0.107356	-0.669558	-2.69062	WP_029056842.1	WP_029056842.1	4494
20.8913	20.8509	20.1628	20.3021	20.0494	20.3459						20	20	20	94.9	94.9	94.9	18.016	0	20.163	152030000	46	0.725947	0.340354	0.402527	1.13765	WP_029056843.1	WP_029056843.1	4495
18.5042	19.9017	17.6359	19.9294	21.5041	21.1866						9	9	9	61	61	61	21.596	0	12.23	267210000	16	1.26026	0.107113	-2.19279	-2.3924	WP_029056845.1	WP_029056845.1	4496
21.7416	21.3798	22.2838	21.6234	21.9055	21.8976						15	15	15	21.8	21.8	21.8	72.621	0	58.893	382440000	52	0.0083904	0.991606	-0.00710805	-0.0187758	WP_029056849.1	WP_029056849.1	4498
22.4579	22.2899	21.9584	22.0173	21.5932	21.7368						9	9	9	57.2	57.2	57.2	15.93	0	33.205	281580000	26	1.10661	0.21107	0.452947	1.54868	WP_029056850.1	WP_029056850.1	4499
22.7423	19.4093	22.6738	22.5161	22.9858	22.7213						22	22	22	68.3	68.3	68.3	37.716	0	124.15	687010000	78	0.438286	0.434177	-1.13261	-0.937506	WP_029056853.1	WP_029056853.1	4502
21.2258	21.1222	21.0203	21.1192	21.4237	21.2853						16	16	16	83.1	83.1	83.1	34.707	0	34.55	235130000	38	0.653354	0.549583	-0.153318	-0.743713	WP_029056854.1	WP_029056854.1	4503
22.915	22.5283	22.1452	21.9337	22.0649	22.2886						15	15	15	84.8	84.8	84.8	11.427	0	34.567	496280000	52	0.819422	0.292946	0.433807	1.25675	WP_029056855.1	WP_029056855.1	4504
20.1944	18.8456	19.6278	19.9931	20.2885	20.3676						16	16	16	82.4	82.4	82.4	24.344	0	47.659	132510000	35	0.744294	0.279144	-0.660484	-1.30203	WP_029056856.1	WP_029056856.1	4505
20.7016	19.1494	18.9223	19.3999	19.9587	20.7289						21	21	21	46.1	46.1	46.1	56.861	0	41.801	122630000	34	0.256551	0.659974	-0.43811	-0.562403	WP_029056861.1	WP_029056861.1	4507
22.1375	19.3427	21.9426	21.4652	21.665	21.6497						22	22	22	55.8	55.8	55.8	44.443	0	20.116	397240000	57	0.191957	0.714553	-0.45238	-0.450965	WP_029056862.1	WP_029056862.1	4508
26.0125	26.1684	26.6204	28.734	29.0379	28.8275				+	2AEP P_Pi	35	35	35	99.3	99.3	99.3	45.735	0	323.31	45150000000	452	3.66658	0.0273333	-2.59933	-8.57128	WP_029056866.1	WP_029056866.1	4509
20.8863	20.8973	21.7771	20.5775	22.6197	23.0077						38	38	38	89.7	89.7	89.7	32.612	0	49.97	586920000	73	0.471813	0.419235	-0.881416	-0.969121	WP_029056868.1	WP_029056868.1	4510
21.3813	21.0482	21.5156	19.1508	21.7277	21.8149						18	18	18	59.6	59.6	59.6	29.5	0	22.224	399660000	48	0.179261	0.736297	0.417239	0.423668	WP_029056871.1	WP_029056871.1	4512
25.8967	25.6063	25.151	24.8878	25.1294	25.1231						23	23	23	92.3	92.3	92.3	17.097	0	107.95	3721400000	151	1.0249	0.21901	0.504543	1.52373	WP_029056873.1	WP_029056873.1	4513
22.219	20.9334	22.8495	23.3814	23.4034	23.2585						41	41	41	70.4	70.4	70.4	67.929	0	133.07	1086000000	121	1.12008	0.121125	-1.34712	-2.02392	WP_029056879.1	WP_029056879.1	4516
21.9345	21.4057	22.2851	22.1565	22.5138	22.3798						26	26	26	57	57	57	44.342	0	183.29	578420000	78	0.794742	0.291918	-0.474934	-1.26308	WP_029056881.1	WP_029056881.1	4517
23.3439	23.5273	23.6796	23.8334	23.9174	23.5638						24	24	24	64.1	64.1	64.1	46.209	0	169.08	1591300000	120	0.817645	0.385475	-0.254621	-1.0427	WP_029056882.1	WP_029056882.1	4518
24.6329	24.5021	24.4995	24.6957	24.968	24.9977						33	33	33	85.5	85.5	85.5	34.9	0	291.8	3474500000	195	1.49835	0.190619	-0.34231	-1.66391	WP_029056883.1	WP_029056883.1	4519
19.2215	19.7144	18.2544	19.5497	20.3083	20.0592						17	17	17	37.1	37.1	37.1	64.209	0	10.102	83460000	27	0.875324	0.211305	-0.908967	-1.55793	WP_029056884.1	WP_029056884.1	4520
19.2186	19.7468	19.3114	19.8875	20.4364	19.7713						13	13	13	38.1	38.1	38.1	45.565	0	20.219	114230000	25	1.08827	0.186706	-0.606154	-1.67507	WP_029056887.1	WP_029056887.1	4521
22.326	20.6299	22.4439	22.6568	22.5877	22.6682						59	59	59	64.8	64.8	64.8	107.76	0	113.19	713350000	91	0.644968	0.309856	-0.837604	-1.22	WP_029056889.1	WP_029056889.1	4523
26.4623	26.0667	25.9	26.0008	25.9733	26.1393						16	16	16	49	49	49	24.892	0	253.77	6912300000	168	0.237305	0.762425	0.105214	0.38332	WP_029056891.1	WP_029056891.1	4525
19.5553	19.7615	21.4277	19.9443	22.6264	22.3489						25	25	25	43.1	43.1	43.1	76.283	0	53.29	501730000	47	0.600462	0.30909	-1.39165	-1.22337	WP_029056892.1	WP_029056892.1	4526
24.324	24.2072	23.6752	23.4008	23.4047	23.5688						22	22	22	99.4	99.4	99.4	18.935	0	87.432	1172900000	94	1.37586	0.125152	0.610683	1.98785	WP_029056897.1	WP_029056897.1	4530
21.895	22.0688	22.0075	22.1571	22.3979	21.9547						8	8	8	32.6	32.6	32.6	34.542	0	12.848	225790000	31	0.580193	0.544193	-0.179447	-0.75445	WP_029056900.1	WP_029056900.1	4531
22.6348	18.9704	22.5023	22.7301	23.4497	23.5359						15	15	15	59.4	59.4	59.4	31.035	0	11.247	1700500000	36	0.694112	0.249369	-1.86942	-1.4089	WP_029056903.1	WP_029056903.1	4532
20.3621	20.4045	19.916	20.0867	20.5164	17.2374						7	7	7	56.4	56.4	56.4	17.929	0	15.88	95267000	13	0.382832	0.496901	0.94732	0.830491	WP_029056908.1	WP_029056908.1	4537
23.1876	22.8963	22.5684	22.5203	23.3286	23.1193						14	14	14	69.2	69.2	69.2	16.91	0	205.77	899460000	100	0.128274	0.84133	-0.105263	-0.262444	WP_029056910.1	WP_029056910.1	4538
21.5929	19.1163	20.5589	21.9809	22.0709	21.8478						28	28	28	57.2	57.2	57.2	42.367	0	21.018	327690000	48	1.00447	0.141898	-1.54383	-1.88026	WP_029056913.1	WP_029056913.1	4541
22.9948	22.6206	22.541	22.5338	22.4013	22.4717						25	25	25	66.7	66.7	66.7	43.374	0	72.425	577060000	62	0.795964	0.396493	0.249888	1.01986	WP_029056916.1	WP_029056916.1	4544
24.1524	24.2348	24.503	19.9481	17.7897	18.6536				+	2AEP P_Pi	29	29	28	54.2	54.2	54.2	43.171	0	74.015	307180000	84	3.00688	0.0384	5.4996	7.47142	WP_029056937.1	WP_029056937.1	4561
27.9895	27.4993	28.1803	19.9732	18.3571	18.6278				+	2AEP P_Pi	47	47	47	81.1	81.1	81.1	45.315	0	323.31	3054600000	282	4.10323	0	8.90365	13.9264	WP_029056938.1	WP_029056938.1	4562
27.9304	26.2865	26.475	18.7954	23.077	19.0304						52	52	52	80.8	80.8	80.8	52.309	0	323.31	1727200000	297	1.94771	0.0702456	6.59638	4.16545	WP_029056939.1	WP_029056939.1	4563
21.3591	20.8133	21.2203	21.1656	21.0003	21.4168						34	34	33	49	49	47.8	64.7	0	41.911	215860000	68	0.112798	0.873628	-0.0633596	-0.208652	WP_029056941.1	WP_029056941.1	4565
19.0808	19.9668	18.4295	20.2196	19.7724	19.1186						12	12	12	47.2	47.2	47.2	41.508	0	39.771	76875000	21	0.423792	0.493371	-0.544524	-0.839898	WP_029057002.1	WP_029057002.1	4605
22.7869	21.7	22.5683	22.5298	23.3979	22.918						30	30	30	75.4	75.4	75.4	58.215	0	73.054	892270000	69	0.648135	0.336917	-0.596848	-1.15631	WP_029057005.1	WP_029057005.1	4607
18.5718	19.4995	19.4099	19.8772	21.4371	21.5387						23	23	23	72.3	72.3	72.3	29.127	0	54.114	255000000	37	1.3635	0.107047	-1.79058	-2.5096	WP_029057006.1	WP_029057006.1	4608
27.2543	27.2904	27.1928	26.4487	26.5976	26.7192						28	28	28	72.4	72.4	72.4	38.658	0	320.8	11201000000	385	2.85663	0.0677073	0.657317	3.58714	WP_029057010.1	WP_029057010.1	4611
19.0515	19.5245	19.2956	18.4265	19.1691	18.581						9	9	9	45	45	45	33.398	0.86909	-2.0682	49036000	11	1.00311	0.212321	0.564998	1.55118	WP_029057018.1	WP_029057018.1	4617
24.2721	24.1012	24.3498	24.1885	24.1752	24.1497						22	22	22	75.7	75.7	75.7	34.536	0	250.44	1946800000	137	0.397912	0.755581	0.0699151	0.401106	WP_029057019.1	WP_029057019.1	4618
21.374	18.8053	21.9679	21.8986	22.3355	21.8894						27	27	27	82.4	82.4	82.4	37.816	0	51.198	460330000	81	0.605095	0.308233	-1.32545	-1.22547	WP_029057027.1	WP_029057027.1	4620
24.7854	24.7252	24.4347	24.3054	24.3778	24.2496						15	15	15	59.6	59.6	59.6	22.363	0	323.31	2098400000	127	1.37627	0.210631	0.337479	1.57354	WP_029057029.1	WP_029057029.1	4622
21.3085	19.6686	19.7141	18.7428	20.8357	21.0033						13	13	13	77.9	77.9	77.9	24.282	0	28.937	194750000	32	0.0133199	0.981993	0.0364698	0.0362789	WP_029057032.1	WP_029057032.1	4625
19.3896	18.9821	19.8413	18.7938	17.807	19.096						9	9	9	20.6	20.6	20.6	51.988	0.00057013	4.1668	26571000	18	0.843603	0.228591	0.838762	1.49358	WP_029057033.1	WP_029057033.1	4626
24.7253	24.6582	25.0395	25.2008	25.3401	25.2827						40	40	40	84.2	84.2	84.2	44.738	0	323.31	4716200000	238	1.70235	0.117169	-0.466824	-2.08134	WP_029057035.1	WP_029057035.1	4628
18.9918	21.3264	20.9133	21.3198	21.3885	21.6398						13	13	13	60.5	60.5	60.5	29.492	0	45.298	324970000	36	0.646618	0.292793	-1.03883	-1.2579	WP_029057036.1	WP_029057036.1	4629
21.9258	20.4064	21.337	20.6385	22.4746	21.9299						17	17	17	67.2	67.2	67.2	32.146	0	38.257	403510000	47	0.260024	0.655529	-0.457914	-0.571339	WP_029057037.1	WP_029057037.1	4630
21.1028	19.4492	21.5418	22.2999	21.5931	21.4582						16	16	16	55.4	55.4	55.4	37.672	0	41.931	304250000	41	0.721467	0.258817	-1.08581	-1.37709	WP_029057038.1	WP_029057038.1	4631
20.4473	20.2718	20.6424	21.0528	20.8567	20.7307						13	13	13	37.4	37.4	37.4	43.671	0	35.403	149090000	37	1.39716	0.165171	-0.426231	-1.75959	WP_029057041.1	WP_029057041.1	4633
19.6728	19.9158	19.8416	19.1611	19.4971	19.5455						20	20	20	35.1	35.1	35.1	75.837	0	29.108	68953000	34	1.35844	0.182873	0.408822	1.69894	WP_029057044.1	WP_029057044.1	4636
24.9398	24.7428	25.2843	25.2003	25.5546	25.4023						34	34	34	71	71	71	62.083	0	309.39	4687200000	221	0.986455	0.260215	-0.396781	-1.37499	WP_029057047.1	WP_029057047.1	4639
22.8401	19.134	21.7628	22.0534	22.2259	22.326						9	9	9	100	100	100	9.6109	0	65.454	381940000	45	0.361391	0.522791	-0.956165	-0.794465	WP_029057053.1	WP_029057053.1	4645
22.5853	22.4248	22.2457	22.9168	22.7247	22.906						27	27	27	84.7	84.7	84.7	32.097	0	88.874	759350000	92	1.683	0.124012	-0.430548	-1.99129	WP_029057054.1	WP_029057054.1	4646
20.4518	19.3888	19.982	19.3861	21.5021	21.2874						18	18	18	36.9	36.9	36.9	50.201	0	76.105	279090000	45	0.457644	0.436826	-0.784316	-0.934345	WP_029057055.1	WP_029057055.1	4647
22.165	22.5116	22.2427	22.6119	22.3684	22.3703						22	22	22	56.5	56.5	56.5	49.972	0	116.37	500310000	81	0.469657	0.625254	-0.143756	-0.618179	WP_029057056.1	WP_029057056.1	4648
20.9753	19.1988	19.6878	21.1886	21.3679	21.4866						29	29	29	67.4	67.4	67.4	53.395	0	41.939	305380000	45	1.21971	0.117068	-1.39371	-2.18844	WP_029057057.1	WP_029057057.1	4649
18.8005	19.5797	19.1646	19.1322	20.9276	20.6518						11	11	11	42.8	42.8	42.8	35.958	0	30.737	155180000	18	0.811602	0.225359	-1.05564	-1.50402	WP_029057064.1	WP_029057064.1	4653
25.5218	25.6266	25.6966	26.1353	26.2009	26.0732						51	51	51	82.2	82.2	82.2	51.227	0	323.31	6776600000	318	2.94077	0.0765437	-0.521514	-3.20403	WP_029057068.1	WP_029057068.1	4655
25.6089	25.4647	25.8692	25.9414	26.1748	26.0868						50	50	50	89.1	89.1	89.1	47.566	0	323.31	7017700000	421	1.431	0.162621	-0.420004	-1.77567	WP_029057069.1	WP_029057069.1	4656
26.2204	25.9922	26.1065	26.1982	26.3571	26.1817						24	24	24	62.6	62.6	62.6	49.608	0	323.31	8274500000	341	0.739312	0.547258	-0.139274	-0.747181	WP_029057070.1	WP_029057070.1	4657
24.9745	25.1792	25.0703	25.2456	25.6711	25.7244						44	44	44	82	82	82	38.619	0	256.42	4976700000	323	1.35733	0.159091	-0.472356	-1.79856	WP_029057071.1	WP_029057071.1	4658
20.0936	20.0688	20.407	20.3953	22.2228	21.2913						48	48	48	45.4	45.4	45.4	126.43	0	59.19	379290000	95	0.968046	0.17199	-1.11333	-1.7431	WP_029057073.1	WP_029057073.1	4660
22.3814	22.2408	22.2014	23.4478	23.7234	23.3888				+	2AEP P_Pi	42	42	42	70.1	70.1	70.1	65.632	0	296.94	1232600000	118	3.36002	0.0441212	-1.24546	-5.74765	WP_029057077.1	WP_029057077.1	4662
22.4785	21.909	22.9859	21.2081	21.7673	22.1996						23	23	23	60.3	60.3	60.3	45.318	0	57.079	418260000	61	0.800267	0.251915	0.732823	1.40062	WP_029057079.1	WP_029057079.1	4664
20.3158	20.0014	19.8205	19.7585	19.8929	19.651						8	8	8	73.1	73.1	73.1	12.062	0	17.742	61702000	24	0.800676	0.376439	0.278454	1.06796	WP_029057085.1	WP_029057085.1	4668
19.7443	20.4572	19.4094	20.0042	19.3841	17.6728						7	7	7	70.3	70.3	70.3	15.885	0	5.5185	51150000	15	0.484825	0.411772	0.849926	0.985375	WP_029057091.1	WP_029057091.1	4672
21.9604	20.6341	21.5209	22.4625	21.1406	22.5102						9	9	9	26.4	26.4	26.4	62.381	0.4655	-0.35132	443710000	32	0.48755	0.423011	-0.665971	-0.958748	WP_029057096.1	WP_029057096.1	4675
20.7709	19.5836	18.696	19.3373	19.453	20.4181						18	18	17	50	50	50	41.851	0	12.08	92989000	29	0.0254742	0.95669	-0.0526148	-0.0664463	WP_029057099.1	WP_029057099.1	4677
21.771	22.1113	22.2702	22.4851	22.1182	22.1495						22	22	22	28.9	28.9	28.9	112.81	0	85.923	537940000	73	0.458406	0.578975	-0.200043	-0.69381	WP_029057106.1	WP_029057106.1	4684
22.402	20.8567	23.0308	22.0459	23.164	22.9109						27	27	27	60.9	60.9	60.9	59.682	0	99.011	757080000	104	0.347141	0.553343	-0.610471	-0.736157	WP_029057108.1	WP_029057108.1	4686
21.8821	20.0614	21.6505	19.6903	20.351	20.9151						10	10	10	45	45	45	25.415	0	45.584	274700000	29	0.582742	0.339869	0.879182	1.13763	WP_029057110.1	WP_029057110.1	4688
24.88	24.9	25.0731	25.3192	25.1945	25.2072						57	57	57	81	81	81	68	0	323.31	3770100000	282	1.77878	0.187729	-0.289241	-1.67197	WP_029057111.1	WP_029057111.1	4689
22.669	22.173	22.834	23.2185	23.5077	23.4314						16	16	16	51.8	51.8	51.8	35.16	0	79.855	1217500000	97	1.72559	0.1088	-0.827204	-2.61227	WP_029057112.1	WP_029057112.1	4690
21.3912	19.7892	21.3837	21.6188	21.7206	21.7975						16	16	16	60.2	60.2	60.2	28.929	0	39.046	371370000	37	0.734321	0.262678	-0.857605	-1.35001	WP_029057113.1	WP_029057113.1	4691
22.1255	20.4893	19.8818	20.292	20.3031	20.313						12	12	12	72.8	72.8	72.8	17.024	0	20.45	102220000	18	0.324621	0.582711	0.529534	0.687675	WP_029057114.1	WP_029057114.1	4692
23.7083	22.9955	23.8955	23.9539	24.3427	24.4142						33	33	33	72.3	72.3	72.3	52.562	0	159.8	2073900000	131	1.06979	0.177555	-0.703847	-1.71989	WP_029057117.1	WP_029057117.1	4695
25.7395	25.7319	25.9781	26.2221	26.6216	26.4552						47	47	47	76.5	76.5	76.5	48.167	0	323.31	10463000000	404	1.91996	0.107781	-0.61646	-2.55519	WP_029057118.1	WP_029057118.1	4696
20.3786	19.8852	20.1517	20.7652	20.3599	20.4337						12	12	12	47.7	47.7	47.7	27.919	0	86.219	146420000	46	0.94139	0.273977	-0.381129	-1.31713	WP_029057120.1	WP_029057120.1	4698
21.0421	21.101	22.3038	22.4201	23.3164	22.6455						16	16	16	69	69	69	17.102	0	30.728	804610000	60	1.25308	0.114723	-1.31171	-2.21807	WP_029057121.1	WP_029057121.1	4699
19.7945	19.9381	20.7302	20.6337	20.8252	20.7765						12	12	12	35.9	35.9	35.9	35.948	0	46.575	184960000	38	0.931307	0.229989	-0.590855	-1.48994	WP_029057122.1	WP_029057122.1	4700
27.5091	27.4281	27.311	27.4607	27.5287	27.341						105	105	105	86.4	86.4	86.4	88.399	0	323.31	16990000000	749	0.12621	0.904654	-0.0273768	-0.152548	WP_029057123.1	WP_029057123.1	4701
19.9379	20.1115	20.0296	18.6441	20.5865	20.1473						13	13	13	36.5	36.5	36.5	40.674	0	26.515	134020000	32	0.147316	0.791497	0.233716	0.338608	WP_029057124.1	WP_029057124.1	4702
23.3395	22.9443	22.7212	22.2472	22.7095	22.8646						30	30	30	85.6	85.6	85.6	20.618	0	174.42	724690000	97	0.694047	0.360742	0.394557	1.09916	WP_029057128.1	WP_029057128.1	4704
22.7061	23.4282	23.1001	18.6687	18.3132	18.8656				+	2AEP P_Pi	11	11	11	74.5	74.5	74.5	25.219	0	32.344	249580000	28	4.14372	0	4.46228	12.259	WP_029057129.1	WP_029057129.1	4705
26.3291	26.2638	26.5172	26.3163	26.1534	26.1997						31	31	31	94.5	94.5	94.5	32.174	0	323.31	7247700000	264	0.748657	0.53494	0.146889	0.772688	WP_029057130.1	WP_029057130.1	4706
26.4893	26.116	26.0445	25.8046	26.2211	26.2915						39	39	39	79.7	79.7	79.7	29.703	0	323.31	8251300000	326	0.209242	0.777573	0.110872	0.363268	WP_029057131.1	WP_029057131.1	4707
23.7711	23.8483	23.8912	23.9802	24.2437	24.4276						33	33	33	66.6	66.6	66.6	49.022	0	168.55	2115200000	190	1.32341	0.201148	-0.380305	-1.62159	WP_029057136.1	WP_029057136.1	4709
19.7426	19.064	19.7367	20.1187	20.9225	20.867						20	20	20	48.7	48.7	48.7	50.561	0	17.361	197120000	29	1.51017	0.106984	-1.1216	-2.52975	WP_029057138.1	WP_029057138.1	4711
22.8503	23.7725	22.6397	22.5637	22.7602	22.337						9	9	9	48.6	48.6	48.6	12.213	0	57.86	670910000	97	0.655147	0.34119	0.533861	1.13894	WP_029057143.1	WP_029057143.1	4712
23.889	23.4989	24.0288	23.9754	24.2187	24.0829						62	62	62	64.3	64.3	64.3	105.99	0	236.36	2058400000	219	0.760286	0.38345	-0.286772	-1.0486	WP_029057146.1	WP_029057146.1	4713
25.5432	25.5011	25.1636	25.4614	25.5745	25.4813						41	41	41	86.4	86.4	86.4	49.252	0	323.31	4103900000	228	0.341094	0.711709	-0.10313	-0.458216	WP_029057148.1	WP_029057148.1	4715
21.6112	21.6301	21.1321	20.6387	20.9332	20.8378						9	9	9	45.9	45.9	45.9	22.944	0	26.641	189920000	51	1.62189	0.110788	0.654575	2.30002	WP_029057149.1	WP_029057149.1	4716
21.729	22.0065	21.9187	22.3637	22.5184	22.3902						22	22	22	40.7	40.7	40.7	59.876	0	48.654	599830000	76	2.32644	0.1034	-0.539382	-2.76865	WP_029057153.1	WP_029057153.1	4719
21.4378	18.6094	20.6132	18.6734	19.0754	18.5696						10	10	10	59.3	59.3	59.3	27.134	0	9.6157	166650000	22	0.78173	0.221957	1.44735	1.5174	WP_029057154.1	WP_029057154.1	4720
20.5118	19.2503	20.5088	21.0323	21.1388	20.9263						9	9	9	15.2	15.2	15.2	22.106	0	49.333	191150000	19	1.04267	0.16003	-0.942184	-1.79647	WP_029057159.1	WP_029057159.1	4725
19.7536	19.4349	18.9808	19.3235	19.086	19.1451						6	6	6	42	42	42	18.679	0.00056529	3.8	26300000	10	0.363371	0.631377	0.204851	0.610913	WP_029057160.1	WP_029057160.1	4726
22.3307	21.8554	22.9718	20.6885	22.2981	21.8946						31	31	31	61.6	61.6	61.6	73.895	0	110.33	420860000	104	0.581616	0.353061	0.758897	1.11317	WP_029057163.1	WP_029057163.1	4729
20.6235	19.3228	20.8048	19.7214	18.7212	20.3175						20	20	20	53.5	53.5	53.5	47.362	0	24.53	63806000	32	0.430554	0.470226	0.663685	0.874063	WP_029057164.1	WP_029057164.1	4730
22.0204	21.193	21.5241	20.5019	21.3542	21.2026						19	19	19	51.8	51.8	51.8	41.563	0	53.195	227140000	74	0.71894	0.308412	0.559605	1.22736	WP_029057165.1	WP_029057165.1	4731
22.435	22.1207	22.4481	21.9644	22.6856	22.2281						21	21	21	69.3	69.3	69.3	44.445	0	71.481	605430000	74	0.0615073	0.915544	0.0418777	0.124525	WP_029057166.1	WP_029057166.1	4732
21.2019	19.497	19.9381	19.9436	19.7871	19.8171						5	5	5	52.8	52.8	52.8	15.739	0	8.4925	101460000	14	0.285447	0.643838	0.363086	0.592162	WP_029057167.1	WP_029057167.1	4733
20.8933	20.992	20.6449	19.4931	20.013	19.7034						10	10	10	46.7	46.7	46.7	22.985	0	32.482	91515000	27	2.42429	0.0740328	1.10691	3.91218	WP_029057168.1	WP_029057168.1	4734
20.523	20.9632	20.4178	19.9908	20.1873	19.4406						7	7	7	40.6	40.6	40.6	21.183	0	14.878	133990000	32	1.28055	0.12146	0.761758	2.01003	WP_029057169.1	WP_029057169.1	4735
19.3717	19.6379	20.6712	21.1147	20.7619	21.0893						11	11	11	50.6	50.6	50.6	27.515	0	59.408	191770000	31	1.24695	0.118265	-1.09503	-2.13749	WP_029057172.1	WP_029057172.1	4738
23.4704	23.5706	23.5284	24.1322	24.1408	24.0223						44	44	44	90.6	90.6	90.6	46.788	0	185.78	1961100000	185	3.55785	0.0743226	-0.575305	-3.8883	WP_029057173.1	WP_029057173.1	4739
20.1966	19.024	19.372	19.6883	19.7136	19.6686						14	14	14	90	90	90	16.146	0	12.16	79581000	25	0.173372	0.781649	-0.159294	-0.355608	WP_029057175.1	WP_029057175.1	4741
22.7958	22.6413	22.3572	22.4304	22.3504	22.2402						27	27	27	43.4	43.4	43.4	73.709	0	100.66	477120000	109	0.857213	0.373563	0.257753	1.07501	WP_029057179.1	WP_029057179.1	4744
22.7453	18.561	23.0798	23.1729	23.2898	23.2905						43	43	43	84.4	84.4	84.4	64.905	0	123.57	993630000	117	0.543623	0.338212	-1.78908	-1.1511	WP_029057180.1	WP_029057180.1	4745
21.5311	18.6694	18.8019	20.0543	21.8252	22.0146						42	42	42	60.3	60.3	60.3	76.424	0	20.16	408930000	51	0.657768	0.26685	-1.63056	-1.33405	WP_029057185.1	WP_029057185.1	4749
20.586	18.9411	19.2629	19.554	19.9682	19.4342						3	3	3	34.3	34.3	34.3	15.321	0	20.092	85735000	11	0.0355219	0.937536	-0.0554886	-0.0882613	WP_029057188.1	WP_029057188.1	4751
24.4292	24.6816	24.5243	25.0416	24.9918	25.0209						60	60	60	87.6	87.6	87.6	55.939	0	323.31	3179200000	300	2.49053	0.106367	-0.473081	-2.70311	WP_029057189.1	WP_029057189.1	4752
21.2366	19.1628	19.6797	19.978	21.0913	20.8484						20	20	20	52.6	52.6	52.6	39.097	0	26.302	192400000	33	0.360387	0.542374	-0.612848	-0.757547	WP_029057190.1	WP_029057190.1	4753
23.2634	23.0852	23.322	23.7304	23.946	23.8263						37	37	37	62.6	62.6	62.6	47.26	0	186.88	1673400000	153	2.52738	0.0795472	-0.610726	-3.13766	WP_029057194.1	WP_029057194.1	4755
22.4014	21.8729	22.3175	22.2788	22.5735	22.4932						16	16	16	56.2	56.2	56.2	27.468	0	49.184	640710000	90	0.605047	0.468553	-0.251244	-0.878241	WP_029057195.1	WP_029057195.1	4756
23.359	23.0638	23.6302	23.7959	23.9358	23.7734						37	37	37	65.3	65.3	65.3	54.702	0	181.2	1620800000	137	1.32301	0.162464	-0.484024	-1.7843	WP_029057196.1	WP_029057196.1	4757
20.786	20.9989	21.0516	20.8735	20.8605	21.2985						7	7	7	29.4	29.4	29.4	24.063	0	21.677	165390000	37	0.147095	0.851707	-0.065335	-0.246344	WP_029057198.1	WP_029057198.1	4759
20.8341	18.9636	20.2998	20.3475	18.0681	19.8331						9	9	9	79.7	79.7	79.7	14.874	0	24.51	59922000	21	0.27968	0.620647	0.616278	0.624738	WP_029057199.1	WP_029057199.1	4760
22.579	20.5377	22.8896	23.7399	24.4187	23.458						71	71	71	62.5	62.5	62.5	135.82	0	245.55	1414900000	174	1.112	0.115327	-1.8701	-2.09924	WP_029057200.1	WP_029057200.1	4761
20.2337	19.161	19.4733	18.7269	20.3891	20.0482						8	8	8	30.8	30.8	30.8	32.824	0	8.8769	103580000	15	0.05699	0.909509	-0.0987218	-0.141298	WP_029057211.1	WP_029057211.1	4770
23.2961	23.0874	22.8621	23.0497	23.2799	23.3351						7	7	7	18.2	18.2	18.2	41.194	0	79.657	972330000	38	0.384892	0.664243	-0.139732	-0.552741	WP_029057212.1	WP_029057212.1	4771
23.3511	23.2261	23.6213	23.3155	23.1494	23.0915						33	33	33	60.3	60.3	60.3	73.648	0	127.08	961050000	115	0.7283	0.446808	0.214025	0.912421	WP_029057213.1	WP_029057213.1	4772
24.1479	23.9332	24.2768	24.4643	24.6661	24.5378						57	57	57	79	79	79	67.118	0	145.47	2509100000	192	1.70233	0.120582	-0.43675	-2.01933	WP_029057214.1	WP_029057214.1	4773
22.3532	22.2824	22.76	22.8971	23.2922	23.2459						30	30	30	64.4	64.4	64.4	45.82	0	88.236	981650000	116	1.60454	0.111274	-0.679872	-2.31128	WP_029057215.1	WP_029057215.1	4774
21.9663	21.5302	21.784	22.4229	22.4273	22.3014						35	35	35	72.6	72.6	72.6	54.06	0	52.888	655550000	85	2.02769	0.106711	-0.62368	-2.67675	WP_029057216.1	WP_029057216.1	4775
24.8127	24.6516	24.7201	25.3762	25.3116	25.1785						63	63	63	74.6	74.6	74.6	82.519	0	323.31	4312200000	349	2.77458	0.0772941	-0.560625	-3.2104	WP_029057217.1	WP_029057217.1	4776
21.2099	21.3134	21.2919	21.5698	21.5755	21.3886						15	15	15	56.1	56.1	56.1	36.479	0	41.572	348030000	48	1.59308	0.248432	-0.239617	-1.41784	WP_029057221.1	WP_029057221.1	4780
24.7127	24.6794	24.3439	23.7323	24.5228	24.6339						19	19	19	100	100	100	15.313	0	220.29	2452400000	158	0.386983	0.578723	0.282321	0.693166	WP_029057224.1	WP_029057224.1	4782
21.4209	21.3862	21.8404	20.4647	20.8004	20.5439						11	11	11	34	34	34	39.425	0	42.729	177500000	47	2.22294	0.0717419	0.946144	3.40737	WP_029057226.1	WP_029057226.1	4784
21.9721	22.0621	22.134	22.0858	21.9197	21.8269						20	20	20	72	72	72	37.603	0	56.382	397410000	59	0.557396	0.64323	0.111937	0.592144	WP_029057227.1	WP_029057227.1	4785
27.5373	27.0657	27.3934	26.6371	27.0237	27.1174						27	27	27	59.7	59.7	59.7	47.549	0	323.31	12439000000	286	0.93676	0.265545	0.406024	1.34146	WP_029057230.1	WP_029057230.1	4788
21.9355	21.7532	21.7934	21.8082	21.8776	21.5285						25	25	25	62.2	62.2	62.2	53.862	0	60.925	368450000	50	0.302176	0.752477	0.0893027	0.405604	WP_029057231.1	WP_029057231.1	4789
20.0403	19.0435	17.9658	19.9891	19.6727	20.1926						11	11	11	34	34	34	47.847	0	23.222	89391000	19	0.68876	0.279597	-0.93493	-1.30248	WP_029057232.1	WP_029057232.1	4790
21.9253	22.3355	21.9789	22.5841	22.5672	22.4277						9	9	9	38.7	38.7	38.7	22.912	0	64.483	538530000	58	1.4978	0.142439	-0.446431	-1.87622	WP_029057233.1	WP_029057233.1	4791
23.001	22.9485	22.9568	23.425	23.6913	23.47						25	25	25	62.7	62.7	62.7	53.664	0	63.96	1329800000	101	2.582	0.0857739	-0.559954	-3.04509	WP_029057234.1	WP_029057234.1	4792
21.4465	21.1499	21.2256	19.0283	20.8085	21.1137						14	14	14	72.8	72.8	72.8	26.411	0	35.507	260600000	42	0.660557	0.291742	0.957165	1.26553	WP_029057235.1	WP_029057235.1	4793
19.0802	19.3777	19.7785	19.3528	19.9058	19.5967						12	12	12	38.2	38.2	38.2	53.649	0	6.2927	80760000	23	0.32921	0.653747	-0.20632	-0.576415	WP_029057237.1	WP_029057237.1	4795
22.0703	20.6141	22.1227	22.6887	22.9187	22.9603						36	36	36	82.6	82.6	82.6	47.509	0	100.15	816390000	88	1.17521	0.1172	-1.25357	-2.08397	WP_029057238.1	WP_029057238.1	4796
19.6017	20.1032	19.3083	20.0509	18.6052	18.5415						5	5	5	77.3	77.3	77.3	7.4312	0.00055402	3.439	51690000	19	0.482932	0.434204	0.605139	0.938563	WP_029057239.1	WP_029057239.1	4797
25.2731	25.2318	25.1341	25.3547	25.3215	25.3192						48	48	48	93.4	93.4	93.4	53.159	0	323.31	4082200000	302	1.30139	0.497287	-0.118785	-0.832001	WP_029057240.1	WP_029057240.1	4798
19.9496	18.7852	20.1624	19.4693	20.3718	20.083						16	16	16	54.7	54.7	54.7	25.524	0	14.267	108120000	25	0.27223	0.658828	-0.342311	-0.566747	WP_029057241.1	WP_029057241.1	4799
21.1011	19.2754	18.967	21.7822	21.354	21.2318						14	14	14	36.5	36.5	36.5	37.037	0	30.085	258760000	25	1.14726	0.117333	-1.67487	-2.12939	WP_029057243.1	WP_029057243.1	4800
22.4889	23.0627	22.6848	22.6768	22.894	23.5235						14	14	14	55.7	55.7	55.7	40.172	0	80.925	1020500000	58	0.396843	0.571096	-0.285999	-0.706761	WP_029057245.1	WP_029057245.1	4801
23.9311	24.1983	24.276	24.4204	24.3886	24.249						26	26	26	46.4	46.4	46.4	51.543	0	121.48	1553100000	105	0.865085	0.40533	-0.217539	-1.00263	WP_029057246.1	WP_029057246.1	4802
20.21	19.936	19.2709	19.2623	20.8953	19.2627						20	20	20	28.1	28.1	28.1	110.85	0.86858	-2.1042	141550000	17	0.000587953	0.99904	-0.00110308	-0.00155034	WP_029057251.1	WP_029057251.1	4804
18.3811	20.3222	18.9949	20.8471	19.9311	19.4215						7	7	7	47.8	47.8	47.8	23.102	0.57846	-0.64142	87373000	8	0.51637	0.392432	-0.833817	-1.03124	WP_029057255.1	WP_029057255.1	4806
18.9363	19.702	18.6583	19.9536	20.711	18.0132						12	12	12	36.1	36.1	36.1	46.993	0	11.702	151470000	16	0.206554	0.698851	-0.460418	-0.478669	WP_029057277.1	WP_029057277.1	4820
21.2383	19.5338	20.1954	19.1989	20.0219	19.6951						5	5	5	54.7	54.7	54.7	12.653	0	6.736	66332000	17	0.549427	0.381687	0.683891	1.05083	WP_029057289.1	WP_029057289.1	4830
20.3655	18.5566	17.9486	20.4095	20.7534	20.3737						13	13	13	43.6	43.6	43.6	38.509	0	23.581	171360000	31	0.991054	0.143097	-1.55528	-1.86069	WP_029057290.1	WP_029057290.1	4831
21.2988	20.6334	21.5752	19.4081	19.899	21.0576						13	13	13	36.4	36.4	36.4	42.22	0	36.017	67602000	28	0.865126	0.209093	1.04755	1.57946	WP_029057295.1	WP_029057295.1	4836
19.0838	19.5094	18.5378	18.9937	21.4503	21.0959						12	12	12	41.3	41.3	41.3	35.728	0	8.0758	222120000	17	0.834791	0.202324	-1.46964	-1.60336	WP_029057298.1	WP_029057298.1	4838
21.8903	22.2818	22.3078	22.0367	21.839	21.9712						18	18	18	44.8	44.8	44.8	58.105	0	104.15	352700000	56	0.648595	0.484764	0.210989	0.854119	WP_029057304.1	WP_029057304.1	4844
21.2578	21.4743	22.9044	19.3244	17.4311	20.8188						11	11	11	59.3	59.3	59.3	39.856	0	27.537	242370000	26	1.14066	0.115331	2.68738	2.22468	WP_029057305.1	WP_029057305.1	4845
20.1684	19.6897	19.1937	18.808	20.3031	19.9837						20	20	20	54.4	54.4	54.4	56.269	0	21.419	115080000	26	0.00881129	0.989467	-0.0143191	-0.0225628	WP_029057310.1	WP_029057310.1	4849
21.6326	19.61	22.0703	21.6725	21.9809	22.2303						13	13	13	54	54	54	34.312	0	54.491	498070000	40	0.480546	0.415184	-0.856968	-0.979681	WP_029057319.1	WP_029057319.1	4856
18.7625	20.0397	19.0662	19.4174	20.0042	19.8239						13	13	13	39.2	39.2	39.2	38.605	0	46.898	127570000	32	0.470544	0.468833	-0.458977	-0.878416	WP_029057321.1	WP_029057321.1	4858
23.0535	22.4256	22.7806	23.0821	23.5566	23.8557						36	36	36	75.5	75.5	75.5	49.412	0	121.87	1192400000	119	1.20946	0.138203	-0.744882	-1.9128	WP_029057325.1	WP_029057325.1	4861
22.1322	22.0507	21.3305	21.6597	21.6475	21.6944						14	14	14	90.9	90.9	90.9	19.599	0	36.032	410160000	49	0.267349	0.697175	0.1706	0.480379	WP_029057326.1	WP_029057326.1	4862
22.027	19.7603	21.9906	22.1876	21.883	22.0933						10	10	10	74.3	74.3	74.3	23.905	0	99.462	354440000	33	0.454029	0.436838	-0.795353	-0.930288	WP_029057327.1	WP_029057327.1	4863
22.4225	22.2321	22.9587	20.1438	21.3519	21.1635						19	19	17	51.5	51.5	51.5	29.77	0	24.203	208670000	42	1.72163	0.0847339	1.65136	3.094	WP_029057331.1	WP_029057331.1	4866
28.5287	28.3046	28.8575	26.6711	27.1026	27.2042						39	39	39	91.1	91.1	91.1	36.4	0	323.31	15778000000	549	2.62573	0.0656364	1.57098	4.77378	WP_029057334.1	WP_029057334.1	4868
23.2005	23.2828	23.5152	23.1531	23.412	23.2036						19	19	19	67.6	67.6	67.6	41.436	0	153.75	1191700000	82	0.24603	0.789444	0.0765953	0.343325	WP_029057335.1	WP_029057335.1	4869
19.0374	20.8656	20.5794	18.4369	21.3433	20.8003						12	12	12	51.3	51.3	51.3	29.499	0	18.552	135710000	29	0.0101786	0.986608	-0.0326691	-0.0282234	WP_029057338.1	WP_029057338.1	4870
21.565	21.2183	19.2757	18.8947	18.182	19.0592						6	6	6	67.3	67.3	67.3	11.828	0	29.317	29651000	9	1.21807	0.112529	1.97434	2.29158	WP_029057339.1	WP_029057339.1	4871
18.702	19.7329	21.4718	19.3796	21.1255	21.8018						16	16	16	100	100	100	16.456	0	62.327	303390000	33	0.299955	0.586994	-0.800054	-0.676026	WP_029057344.1	WP_029057344.1	4874
23.9855	23.7915	23.4326	22.5921	22.6625	22.9602						19	19	19	48.7	48.7	48.7	37.019	0	151.66	696670000	100	2.14318	0.0729787	0.9983	3.35701	WP_029057347.1	WP_029057347.1	4875
19.9818	18.9296	19.772	19.9165	20.0975	19.8769						8	8	8	32.4	32.4	32.4	37.866	0	17.649	114210000	21	0.540862	0.434571	-0.402487	-0.939067	WP_029057352.1	WP_029057352.1	4879
23.542	23.1885	23.5381	23.3619	23.5844	23.6924						18	18	18	88.7	88.7	88.7	25.695	0	130.94	1103900000	108	0.333893	0.694335	-0.123334	-0.488775	WP_029057353.1	WP_029057353.1	4880
22.147	19.6032	21.8648	19.7298	21.3194	21.5976						4	4	4	48.6	48.6	48.6	11.038	0	15.931	257030000	21	0.118308	0.824128	0.322716	0.295182	WP_029057354.1	WP_029057354.1	4881
24.2414	24.0913	23.8187	22.7556	23.0101	23.7131						42	42	42	33.3	33.3	33.3	228.47	0	303.42	1057200000	166	1.33614	0.117544	0.890847	2.16264	WP_029057355.1	WP_029057355.1	4882
27.7564	27.3839	26.8451	26.4054	26.633	26.6362						11	11	11	97.8	97.8	97.8	9.3575	0	172.85	9196300000	153	1.31036	0.119184	0.770287	2.05218	WP_029057356.1	WP_029057356.1	4883
24.2975	24.1012	24.4596	24.6585	25.062	24.8233						70	70	70	72.2	72.2	72.2	89.362	0	294.13	3161400000	276	1.64017	0.117955	-0.56186	-2.19156	WP_029057357.1	WP_029057357.1	4884
25.0996	24.8115	24.8461	25.3768	25.3271	25.3641						48	48	48	88.4	88.4	88.4	46.245	0	323.31	4167400000	293	2.04642	0.112632	-0.436953	-2.27538	WP_029057358.1	WP_029057358.1	4885
23.8503	23.849	23.8279	23.7478	23.9025	24.0044						16	16	16	59.2	59.2	59.2	23.173	0	70.826	1690700000	126	0.220851	0.851777	-0.0424525	-0.242656	WP_029057359.1	WP_029057359.1	4886
26.2809	26.0966	26.3431	26.0931	26.6529	26.5082						58	58	58	76.1	76.1	76.1	50.485	0	323.31	9347500000	486	0.412282	0.620801	-0.177856	-0.627645	WP_029057360.1	WP_029057360.1	4887
21.6286	21.2148	20.1009	20.2328	20.6999	20.2532						6	6	6	42	42	42	12.272	0	22.032	132130000	37	0.537687	0.403394	0.586155	1.00887	WP_029057362.1	WP_029057362.1	4888
26.4631	26.3075	26.2218	26.2689	26.5227	26.5238						37	37	37	82.9	82.9	82.9	52.171	0	323.31	9805800000	345	0.415284	0.682176	-0.107695	-0.51199	WP_029057363.1	WP_029057363.1	4889
22.7218	22.5213	22.2933	21.4675	21.0509	21.8209						10	10	10	65.3	65.3	65.3	29.16	0	131.46	321700000	50	1.85815	0.0874286	1.06571	3.00495	WP_029057364.1	WP_029057364.1	4890
25.585	25.6068	25.7527	25.9017	26.2508	26.2757						49	49	49	76.9	76.9	76.9	52.097	0	323.31	6274700000	367	1.70215	0.117423	-0.494576	-2.13458	WP_029057369.1	WP_029057369.1	4893
24.9311	24.8477	24.5786	24.2238	23.8578	24.095						52	52	52	68.5	68.5	68.5	88.832	0	112.55	1025600000	133	2.06754	0.09536	0.726958	2.89617	WP_029057372.1	WP_029057372.1	4895
19.7046	18.8009	19.6219	19.1408	20.097	20.0126						14	14	14	52.8	52.8	52.8	35.423	0	26.828	99605000	34	0.37326	0.563771	-0.374348	-0.719552	WP_029057374.1	WP_029057374.1	4896
21.4355	21.6937	21.11	21.5432	21.2742	21.2079						15	15	15	63.9	63.9	63.9	26.213	0	18.235	373060000	44	0.132774	0.853324	0.0712465	0.23945	WP_029057376.1	WP_029057376.1	4898
18.9585	20.3999	18.6971	19.5953	19.8445	19.6721						14	14	14	62.9	62.9	62.9	31.331	0	18.56	81072000	24	0.262776	0.662858	-0.35213	-0.554943	WP_029057377.1	WP_029057377.1	4899
23.1796	23.1661	23.7521	23.4311	23.6626	23.8028						27	27	27	80.8	80.8	80.8	44.187	0	77.223	1415300000	112	0.529436	0.498047	-0.266278	-0.828369	WP_029057378.1	WP_029057378.1	4900
21.3594	21.1326	20.3992	20.7851	21.293	20.5592						3	3	3	12.8	12.8	12.8	8.3833	0	20.103	208470000	13	0.0826983	0.887462	0.0846418	0.183202	WP_029057379.1	WP_029057379.1	4901
23.0042	23.0047	22.9034	22.6857	22.5067	22.5675						10	10	10	51.4	51.4	51.4	25.305	0	44.539	616900000	69	2.45101	0.10944	0.384122	2.36485	WP_029057380.1	WP_029057380.1	4902
23.2684	23.1196	23.6508	23.3781	23.1125	23.1097						14	14	14	57.8	57.8	57.8	32.559	0	53.995	822960000	65	0.3318	0.67971	0.146161	0.519217	WP_029057381.1	WP_029057381.1	4903
25.5032	25.2975	24.8274	24.0081	24.6395	24.448						20	20	20	87.1	87.1	87.1	16.251	0	298.68	3232300000	239	1.43411	0.115213	0.844129	2.25854	WP_029057382.1	WP_029057382.1	4904
24.605	24.1966	24.0823	23.5893	23.7052	23.9145						10	10	10	65.9	65.9	65.9	9.5403	0	79.948	1080900000	70	1.4062	0.128774	0.558263	1.95891	WP_029057383.1	WP_029057383.1	4905
24.9503	24.9182	24.5311	24.5054	24.8522	24.5396						17	17	17	66.5	66.5	66.5	22.462	0	85.385	1932400000	124	0.408199	0.630774	0.167462	0.610882	WP_029057384.1	WP_029057384.1	4906
25.9183	25.7747	25.0376	26.571	26.5667	26.5502						46	46	46	80.1	80.1	80.1	46.083	0	323.31	9234900000	332	1.64765	0.106405	-0.985762	-2.64362	WP_029057385.1	WP_029057385.1	4907
21.2375	20.6757	21.0179	24.2809	24.3306	24.0077				+	2AEP P_Pi	42	42	42	73.4	73.4	73.4	57.657	0	123.37	1753200000	130	4.13701	0.0154286	-3.22936	-11.0668	WP_029057387.1	WP_029057387.1	4909
22.8971	22.1026	22.9948	25.267	25.4153	25.2011				+	2AEP P_Pi	49	49	49	70.6	70.6	70.6	55.335	0	274.4	4051200000	236	3.08888	0.0318182	-2.62964	-6.75055	WP_029057389.1	WP_029057389.1	4911
20.2119	19.5188	20.3388	20.6277	20.4343	20.4248						21	21	21	53.2	53.2	53.2	49.523	0	26.965	158880000	42	0.83221	0.278409	-0.472458	-1.30058	WP_029057395.1	WP_029057395.1	4915
19.2935	18.9329	19.188	19.7139	21.201	20.9297						18	18	18	34.5	34.5	34.5	61.022	0	36.932	195190000	30	1.45977	0.109379	-1.4767	-2.59256	WP_029057397.1	WP_029057397.1	4917
25.4355	25.1106	25.6734	25.7375	25.8776	25.8052						44	44	44	78.9	78.9	78.9	51.391	0	240.38	5895300000	256	1.12015	0.228153	-0.400274	-1.4933	WP_029057398.1	WP_029057398.1	4918
23.0404	22.7512	22.5266	22.1889	22.4024	22.7324						26	26	26	97.4	97.4	97.4	16.42	0	103.26	692840000	100	0.696025	0.384121	0.331509	1.04566	WP_029057400.1	WP_029057400.1	4920
28.2459	27.9174	28.0747	27.9833	28.456	28.4739						48	48	48	91.3	91.3	91.3	35.617	0	323.31	33609000000	513	0.531323	0.531275	-0.225011	-0.785229	WP_029057403.1	WP_029057403.1	4921
25.0193	25.0265	25.156	25.14	25.5116	25.4426						72	72	72	64	64	64	94.276	0	323.31	4572000000	405	1.14232	0.26693	-0.29744	-1.33709	WP_029057408.1	WP_029057408.1	4923
21.341	21.1411	20.955	21.096	21.1921	21.1699						13	13	13	55	55	55	28.429	0	25.47	240810000	39	0.0201259	0.985515	-0.00696055	-0.0323456	WP_029057411.1	WP_029057411.1	4924
19.5605	20.077	18.9511	19.2213	21.0674	20.3382						4	4	4	32.9	32.9	32.9	15.782	0	17.102	119790000	15	0.468555	0.436452	-0.679438	-0.933644	WP_029057412.1	WP_029057412.1	4925
21.8508	20.9666	21.529	19.6172	21.2336	21.312						9	9	9	61.2	61.2	61.2	15.917	0	28.59	234500000	37	0.524992	0.394429	0.727912	1.02554	WP_029057413.1	WP_029057413.1	4926
24.3838	24.4779	24.5436	24.8135	24.9701	24.8552						46	46	46	95.8	95.8	95.8	49.262	0	199.37	2765800000	225	2.4733	0.104796	-0.411147	-2.47832	WP_029057414.1	WP_029057414.1	4927
21.9779	19.4829	21.1544	20.5719	21.5811	22.3885						9	9	9	55.3	55.3	55.3	22.725	0	50.767	367740000	26	0.287191	0.612464	-0.642078	-0.640346	WP_029057416.1	WP_029057416.1	4929
20.3183	19.6086	19.2698	21.2838	21.3312	21.0622						10	10	10	53.4	53.4	53.4	24.918	0.0005777	4.3911	399790000	31	2.02129	0.0703133	-1.49352	-3.55733	WP_029057417.1	WP_029057417.1	4930
19.1725	18.3004	18.5079	20.2983	18.3064	18.5893						6	6	6	30.7	30.7	30.7	26.569	0	9.7354	31759000	12	0.235316	0.680583	-0.404382	-0.521426	WP_029057424.1	WP_029057424.1	4934
22.3482	21.3617	22.3333	22.8679	23.1105	23.1438						27	27	27	60.4	60.4	60.4	49.294	0	61.118	795430000	74	1.41503	0.109265	-1.02633	-2.34446	WP_029057445.1	WP_029057445.1	4951
20.9973	19.3346	21.6362	22.1754	23.1244	22.8969						37	37	37	93.3	93.3	93.3	30.88	0	65.821	726020000	71	1.30856	0.104722	-2.07619	-2.46214	WP_029057446.1	WP_029057446.1	4952
19.3285	20.5271	20.3918	20.2914	20.6376	20.7758						24	24	24	58.4	58.4	58.4	44.047	0	32.044	221740000	54	0.527254	0.422866	-0.485797	-0.961111	WP_029057447.1	WP_029057447.1	4953
21.7988	21.0463	20.9591	21.3193	21.4276	21.82						18	18	18	19.5	19.5	19.5	111.8	0	53.829	340750000	56	0.342965	0.62174	-0.25426	-0.624862	WP_029057456.1	WP_029057456.1	4960
24.4278	23.7118	25.3712	24.7263	25.3818	25.4385						27	27	27	76.3	76.3	76.3	39.264	0	284.33	4275400000	161	0.566659	0.374177	-0.678586	-1.07355	WP_029057463.1	WP_029057463.1	4967
19.5969	18.7651	18.93	20.2587	23.4616	22.9807						86	86	86	50.8	50.8	50.8	221.23	0	71.304	733660000	116	1.41888	0.104144	-3.13634	-2.77771	WP_029057464.1	WP_029057464.1	4968
19.4125	19.429	20.9976	18.7406	21.6549	21.4428						16	16	16	67.8	67.8	67.8	30.45	0	48.093	208750000	28	0.244899	0.659441	-0.666418	-0.567012	WP_029057465.1	WP_029057465.1	4969
19.1908	19.1555	21.7503	21.8892	22.8034	22.2415						25	25	25	76.8	76.8	76.8	50.825	0	58.784	582190000	54	1.19124	0.114016	-2.2792	-2.28057	WP_029057466.1	WP_029057466.1	4970
20.4547	20.6673	20.8828	21.4552	21.763	21.4592						18	18	18	56.9	56.9	56.9	36.507	0	67.107	342520000	48	2.29085	0.0725217	-0.890881	-3.42397	WP_029057467.1	WP_029057467.1	4971
22.2536	19.5264	22.2239	23.6455	24.2221	23.9055						18	18	18	66.9	66.9	66.9	40.401	0	94.63	2128000000	54	1.31887	0.108043	-2.58974	-2.54042	WP_029057468.1	WP_029057468.1	4972
22.0744	21.2977	21.9433	22.0871	23.3457	22.9913						24	24	24	84	84	84	26.889	0	112.98	1160900000	60	1.09484	0.139535	-1.03624	-1.90128	WP_029057476.1	WP_029057476.1	4975
19.4278	23.0371	21.6848	19.5302	22.2589	21.6811						19	19	19	50.6	50.6	50.6	46.247	0.81311	-1.5903	344400000	35	0.0584652	0.904227	0.226496	0.157209	WP_029057478.1	WP_029057478.1	4976
23.9155	23.4347	23.9287	24.1661	24.3918	24.022						33	33	33	76.3	76.3	76.3	53.885	0	185.05	1976200000	148	1.04514	0.234191	-0.433664	-1.47044	WP_029057480.1	WP_029057480.1	4977
23.5534	23.0804	23.6446	23.4244	23.7733	23.9777						31	31	31	62.1	62.1	62.1	52.075	0	175.58	1356300000	112	0.556841	0.466796	-0.29901	-0.884534	WP_029057489.1	WP_029057489.1	4982
21.2293	19.3939	20.6356	18.4179	21.3902	19.5789						4	4	4	19.1	19.1	19.1	25.006	0	6.9381	143760000	20	0.24125	0.66239	0.623931	0.557097	WP_029057493.1	WP_029057493.1	4986
20.102	20.9007	20.4475	19.3634	21.3134	21.1302						16	16	16	73.6	73.6	73.6	34.461	0	33.206	271070000	27	0.0622746	0.904161	-0.118937	-0.155816	WP_029057496.1	WP_029057496.1	4989
21.2654	21.734	21.7295	21.91	22.1538	22.0536						21	21	21	58.2	58.2	58.2	45.659	0	57.728	590220000	57	1.27118	0.180075	-0.462805	-1.70903	WP_029057497.1	WP_029057497.1	4990
22.8737	22.9909	23.2814	23.7547	23.875	23.6471						74	74	74	80.1	80.1	80.1	99.048	0	241.71	1308700000	182	2.17135	0.0867	-0.71029	-2.98575	WP_029057500.1	WP_029057500.1	4993
20.022	18.986	19.8386	20.1461	19.9201	19.851						18	18	18	67.6	67.6	67.6	27.774	0	23.96	78201000	30	0.465759	0.498457	-0.356869	-0.82722	WP_029057502.1	WP_029057502.1	4995
23.3663	23.1299	22.1318	22.0864	22.2753	22.2953						13	13	13	81.8	81.8	81.8	6.4366	0	47.059	478670000	68	0.78955	0.262506	0.656986	1.35714	WP_029057503.1	WP_029057503.1	4996
20.0609	20.2038	19.7793	20.3516	19.8941	18.5011						7	7	7	53.3	53.3	53.3	13.76	0	15.757	67064000	21	0.309367	0.609791	0.432453	0.645173	WP_029057504.1	WP_029057504.1	4997
23.4451	22.9333	22.9549	22.609	22.9091	23.0156						12	12	12	82.5	82.5	82.5	15.973	0	46.022	731510000	71	0.573668	0.4739	0.266504	0.868794	WP_029057508.1	WP_029057508.1	5000
18.9799	18.4121	19.38	19.3241	20.0063	19.4852						19	19	19	93.7	93.7	93.7	28.704	0.00056275	3.6813	76000000	24	0.913456	0.220289	-0.681234	-1.51993	WP_029057509.1	WP_029057509.1	5001
20.3632	20.2974	19.6829	19.9157	20.0074	19.9306						7	7	7	85.9	85.9	85.9	15.328	0	26.441	108830000	26	0.304061	0.6821	0.163235	0.512529	WP_029057511.1	WP_029057511.1	5002
23.8714	22.3825	24.0009	24.1311	24.0972	24.0984						67	67	67	78.1	78.1	78.1	89.302	0	174.39	1791200000	172	0.594577	0.352339	-0.690633	-1.1151	WP_029057515.1	WP_029057515.1	5005
22.4201	21.5999	21.6198	23.5908	24.9493	24.5698						21	21	21	97.3	97.3	97.3	12.208	0	151.51	2573600000	143	2.16132	0.0710545	-2.49002	-4.24517	WP_029057517.1	WP_029057517.1	5007
19.2721	19.7262	19.6094	19.9438	20.1592	21.181						12	12	12	71.5	71.5	71.5	30.913	0	10.759	133570000	18	1.03405	0.164951	-0.892085	-1.76599	WP_029057520.1	WP_029057520.1	5009
21.4553	21.4087	21.8215	19.3867	21.6091	21.2406						31	31	31	51.3	51.3	51.3	68.233	0	66.592	280290000	74	0.511043	0.395954	0.816343	1.0205	WP_029057523.1	WP_029057523.1	5012
22.7557	22.2385	22.3875	22.6051	22.9024	22.8881						17	17	17	68.7	68.7	68.7	30.327	0	103.94	823600000	87	0.865401	0.317757	-0.337974	-1.19992	WP_029057530.1	WP_029057530.1	5016
23.7411	23.6393	23.9503	23.7985	24.1833	24.1745						19	19	19	92.2	92.2	92.2	22.418	0	113.65	1747300000	105	0.814363	0.374136	-0.275183	-1.07321	WP_029057531.1	WP_029057531.1	5017
21.6536	21.5884	21.6665	21.6899	21.8566	21.8555						17	17	17	58.6	58.6	58.6	42.635	0	65.071	424960000	58	1.27685	0.39408	-0.164498	-1.02538	WP_029057532.1	WP_029057532.1	5018
19.3798	19.6568	19.4276	20.8309	15.1871	16.3675						5	5	5	20.2	20.2	20.2	29.574	0.00055586	3.4982	5373800	12	0.516746	0.35338	2.02624	1.11285	WP_029057539.1	WP_029057539.1	5023
22.0456	19.5471	19.1403	18.9174	21.3832	21.4112						12	12	12	58.6	58.6	58.6	29.077	0	13.892	270220000	17	0.0949388	0.852044	-0.326247	-0.245647	WP_029057542.1	WP_029057542.1	5025
20.5888	19.9769	20.4347	20.5534	21.5277	21.0944						21	21	21	65.8	65.8	65.8	37.365	0	51.229	205030000	44	1.01131	0.189768	-0.725053	-1.66126	WP_029057544.1	WP_029057544.1	5027
26.4333	26.2369	25.4655	25.6014	25.4576	25.537						23	23	23	87.2	87.2	87.2	15.755	0	108.36	4008100000	127	0.794751	0.282451	0.513222	1.28866	WP_029057557.1	WP_029057557.1	5034
25.8093	25.6826	25.785	25.8935	26.0859	26.1356						38	38	38	84.1	84.1	84.1	37.746	0	229.49	6729900000	256	1.54354	0.218575	-0.279362	-1.52302	WP_029057558.1	WP_029057558.1	5035
24.3827	24.1806	23.843	23.4405	23.6016	23.5635						11	11	11	77.5	77.5	77.5	13.996	0	115.86	1104200000	107	1.65935	0.11429	0.600238	2.26698	WP_029057559.1	WP_029057559.1	5036
24.7151	24.8028	24.5051	23.9855	24.2639	24.3631						27	27	27	98.4	98.4	98.4	13.784	0	89.123	2109000000	171	1.51485	0.134448	0.47013	1.93134	WP_029057560.1	WP_029057560.1	5037
22.9664	22.4564	22.5422	21.8926	22.3635	22.5719						16	16	16	85.4	85.4	85.4	21.211	0	100.17	626730000	62	0.673717	0.376962	0.379002	1.06643	WP_029057561.1	WP_029057561.1	5038
20.9473	20.3576	20.8509	20.8546	21.3441	20.9631						6	6	6	16.2	16.2	16.2	47.964	0	12.374	259150000	19	0.643439	0.405073	-0.335375	-1.00008	WP_029057562.1	WP_029057562.1	5039
24.766	24.9344	24.178	24.113	24.3687	24.2896						26	26	26	75	75	75	16.097	0	91.281	1974300000	161	0.696553	0.371587	0.369026	1.08082	WP_029057563.1	WP_029057563.1	5040
24.5959	24.2149	23.4744	23.218	23.6889	23.6348						12	12	12	85.9	85.9	85.9	7.2484	0	136.32	1384000000	67	0.737614	0.293214	0.581184	1.25993	WP_029057564.1	WP_029057564.1	5041
26.0877	26.0241	25.5829	24.8616	25.312	25.459						28	28	28	82.2	82.2	82.2	20.646	0	134.63	4595800000	196	1.34091	0.120373	0.687377	2.02308	WP_029057565.1	WP_029057565.1	5042
24.9091	24.562	23.8045	23.8498	23.8623	23.8059						20	20	19	92.5	92.5	90.8	12.984	0	141.47	1399400000	96	0.831908	0.260042	0.585882	1.37345	WP_029057566.1	WP_029057566.1	5043
24.9208	24.6204	24.1271	23.699	24.301	24.4074						21	21	21	92.1	92.1	92.1	19.254	0	96.715	2070900000	125	0.586924	0.405217	0.420308	1.00156	WP_029057567.1	WP_029057567.1	5044
24.5924	24.3588	24.6001	23.9492	24.3857	24.0666						14	14	14	81.1	81.1	81.1	14.616	0	108.71	1578300000	117	1.18085	0.221525	0.383228	1.51725	WP_029057568.1	WP_029057568.1	5045
23.938	23.8435	23.2035	23.156	23.3124	23.3035						9	9	9	55.4	55.4	55.4	11.601	0	60.338	1155100000	76	0.790256	0.317133	0.404311	1.20266	WP_029057569.1	WP_029057569.1	5046
25.0383	24.9731	23.9801	23.934	24.4	24.0309						19	19	19	92.4	92.4	92.4	11.256	0	274.07	1950200000	160	0.662836	0.33818	0.54219	1.15199	WP_029057571.1	WP_029057571.1	5047
24.8706	24.654	24.0725	23.8986	24.1219	24.2269						19	19	19	83.6	83.6	83.6	13.391	0	98.364	1895500000	171	0.809186	0.292756	0.449861	1.25944	WP_029057572.1	WP_029057572.1	5048
24.9058	24.4408	23.9274	23.7157	24.2078	24.1641						17	17	17	91.2	91.2	91.2	9.1383	0	146.01	1769400000	137	0.539944	0.436973	0.395499	0.934163	WP_029057573.1	WP_029057573.1	5049
25.0887	24.475	24.5337	22.9443	23.6244	23.8579						10	10	10	78.8	78.8	78.8	7.6888	0	163.9	1415700000	65	1.65633	0.102933	1.22357	2.80241	WP_029057574.1	WP_029057574.1	5050
24.655	24.7821	24.1162	24.051	24.0668	24.1985						14	14	14	79.6	79.6	79.6	15.437	0	27.511	1739700000	103	0.91991	0.26662	0.412348	1.33283	WP_029057575.1	WP_029057575.1	5051
25.3734	25.1699	25.2705	25.1392	25.5969	25.6158						43	43	43	94.1	94.1	94.1	26.634	0	257.33	5065300000	268	0.465945	0.588537	-0.179379	-0.673032	WP_029057576.1	WP_029057576.1	5052
24.9778	24.5971	24.2336	23.9092	24.0321	24.135						16	16	16	81.7	81.7	81.7	13.878	0	135.4	1874600000	137	1.20839	0.162644	0.57736	1.77904	WP_029057577.1	WP_029057577.1	5053
24.8485	24.7676	23.9328	23.3943	23.6502	23.8881						15	15	15	91.3	91.3	91.3	10.452	0	70.332	1501100000	118	1.25732	0.119113	0.87211	2.04936	WP_029057578.1	WP_029057578.1	5054
25.4577	25.5627	25.0401	25.0823	25.5154	25.4534						39	39	39	84.8	84.8	84.8	30.055	0	299.66	4971400000	276	0.00488038	0.995801	0.00311724	0.0100813	WP_029057579.1	WP_029057579.1	5055
25.3108	24.7103	24.2181	24.2794	24.3008	24.2797						12	12	12	91.8	91.8	91.8	10.471	0	181.67	2021500000	112	0.658741	0.358163	0.459777	1.10513	WP_029057580.1	WP_029057580.1	5056
26.7252	26.4614	25.9254	26.1644	25.9616	26.0153						27	27	27	80.1	80.1	80.1	22.465	0	309.94	5363900000	210	0.595621	0.432649	0.323606	0.943524	WP_029057581.1	WP_029057581.1	5057
25.7349	25.5567	25.2106	25.3278	25.7079	25.6645						33	33	33	95.3	95.3	95.3	25.158	0	321.33	4580300000	230	0.12359	0.865125	-0.0660063	-0.22355	WP_029057582.1	WP_029057582.1	5058
24.9909	24.792	23.8876	23.7945	24.1827	24.1003						16	16	16	72.5	72.5	72.5	11.568	0	45.184	1620700000	104	0.670299	0.336921	0.531031	1.15579	WP_029057583.1	WP_029057583.1	5059
21.743	20.1778	21.8945	21.4514	20.4103	22.1299						14	14	14	28.8	28.8	28.8	50.724	0.61262	-0.74328	263280000	34	0.0265367	0.955322	-0.0587514	-0.0697408	WP_029057592.1	WP_029057592.1	5064
22.4987	21.6565	22.7711	21.7124	22.3912	22.4966						19	19	19	54.9	54.9	54.9	53.697	0	106.34	546310000	65	0.0932756	0.872141	0.108687	0.210692	WP_029057594.1	WP_029057594.1	5066
21.5948	19.2437	21.7453	21.6763	21.6497	21.8083						22	22	22	93	93	93	26.534	0	60.191	383930000	57	0.451131	0.435825	-0.850172	-0.932786	WP_029057604.1	WP_029057604.1	5074
25.4549	25.364	25.7679	26.2976	26.3138	26.1603						71	71	71	73.4	73.4	73.4	85.647	0	323.31	7108800000	379	2.28232	0.0792762	-0.728307	-3.14371	WP_029057607.1	WP_029057607.1	5076
20.8027	20.9755	18.6362	20.7035	20.6561	20.7923						9	9	9	39	39	39	23.931	0	54.391	215390000	23	0.314167	0.58759	-0.579138	-0.678392	WP_029057608.1	WP_029057608.1	5077
22.9326	21.7755	22.7597	23.4777	24.3189	23.9529						32	32	32	71.1	71.1	71.1	40.357	0	152.22	1715800000	133	1.51629	0.106753	-1.42721	-2.66804	WP_029057609.1	WP_029057609.1	5078
19.9246	20.0084	18.9664	21.7863	22.1299	21.5906						32	32	32	63	63	63	47.203	0	108.57	406670000	76	2.40014	0.0698261	-2.20247	-4.69045	WP_029057610.1	WP_029057610.1	5079
23.7211	21.1353	22.1294	22.6918	24.7342	24.3606						12	12	12	100	100	100	12.035	0	74.417	1977300000	77	0.749602	0.232038	-1.60025	-1.48106	WP_029057611.1	WP_029057611.1	5080
23.5045	23.5436	23.6066	24.1928	24.6827	24.5059						27	27	27	71	71	71	39.092	0	175.6	2751200000	198	2.46656	0.0727778	-0.908914	-3.69038	WP_029057612.1	WP_029057612.1	5081
22.1425	21.5415	22.037	22.4108	21.8987	22.2138						39	39	39	71.6	71.6	71.6	59.536	0	161.5	487300000	93	0.489872	0.524546	-0.267458	-0.791691	WP_029057613.1	WP_029057613.1	5082
20.5482	21.0969	20.7919	20.2905	21.0576	20.7537						18	18	18	46.2	46.2	46.2	27.696	0	36.4	171080000	57	0.152419	0.821976	0.111745	0.298998	WP_029057614.1	WP_029057614.1	5083
21.0015	19.5572	21.3185	21.3157	21.4768	21.121						16	16	16	69.5	69.5	69.5	37.622	0	20.192	234240000	40	0.543617	0.385152	-0.678751	-1.04147	WP_029057617.1	WP_029057617.1	5085
20.8525	20.2157	20.3153	19.8922	19.9627	20.2258						10	10	10	65.2	65.2	65.2	14.794	0	15.46	132790000	20	0.912042	0.263778	0.434274	1.34745	WP_029057627.1	WP_029057627.1	5090
20.5048	20.5675	20.5139	20.2276	20.0964	20.2971						15	14	14	54.1	52.4	52.4	41.539	0	24.136	127530000	45	2.18191	0.125169	0.321702	1.98545	WP_029057629.1	WP_029057629.1	5091
21.5812	19.2606	20.3826	21.5482	21.9697	21.2892						14	14	14	54.2	54.2	54.2	41.852	0	54.577	358200000	50	0.78884	0.227654	-1.1942	-1.49511	WP_029057631.1	WP_029057631.1	5093
18.9466	20.2563	20.3486	19.8914	20.7838	20.1847						15	15	15	51.7	51.7	51.7	33.186	0	16.952	207720000	30	0.345287	0.574763	-0.436137	-0.699605	WP_029057632.1	WP_029057632.1	5094
22.0685	19.2286	19.8472	19.0292	23.0712	21.553						19	19	19	47.2	47.2	47.2	62.893	0	10.89	593240000	36	0.223643	0.671964	-0.836351	-0.535963	WP_029057634.1	WP_029057634.1	5096
21.5787	21.7492	21.6199	21.5364	21.4926	21.3254						27	27	27	49.6	49.6	49.6	74.097	0	102.24	311680000	80	1.13027	0.369138	0.197779	1.08496	WP_029057639.1	WP_029057639.1	5099
19.4157	20.5392	18.0677	18.2378	18.2206	18.2267						9	9	9	40.9	40.9	40.9	22.566	0	8.8908	28069000	21	0.71123	0.260068	1.11251	1.36594	WP_029057643.1	WP_029057643.1	5103
23.848	19.3549	18.988	23.9043	24.3665	24.2618						27	27	27	41.3	41.3	41.3	63.225	0	82.428	1255500000	47	1.03192	0.120225	-3.44723	-2.0658	WP_029057645.1	WP_029057645.1	5105
19.2733	18.9569	17.6617	19.9878	20.5623	20.3032						14	14	14	43.7	43.7	43.7	41.397	0	72.286	132240000	19	1.474	0.105385	-1.6538	-2.66631	WP_029057647.1	WP_029057647.1	5106
20.8136	20.4881	20.7407	20.357	18.8834	19.3014						5	5	5	54	54	54	18.258	0	27.621	396990000	11	1.21992	0.116098	1.16688	2.12393	WP_029057651.1	WP_029057651.1	5109
26.5793	27.5111	22.4844	27.9274	27.8132	27.8832						20	20	20	60.4	60.4	60.4	43.917	0	323.31	22114000000	306	0.693009	0.245978	-2.34967	-1.42904	WP_029057654.1	WP_029057654.1	5110
19.8335	18.8326	19.3456	19.7818	18.6751	18.7182						14	14	14	49.6	49.6	49.6	45.797	0	17.427	47978000	21	0.236928	0.691405	0.278875	0.49524	WP_029057657.1	WP_029057657.1	5113
24.9969	24.7087	24.9697	24.2813	24.8035	24.6884						33	33	33	91.3	91.3	91.3	37.015	0	176.46	2915300000	197	0.754755	0.378005	0.300723	1.06217	WP_029057658.1	WP_029057658.1	5114
20.9355	19.1374	21.8088	19.5918	18.5326	18.9347						4	4	4	18.8	18.8	18.8	29.564	0.7142	-1.1079	24625000	15	0.886651	0.182213	1.60754	1.70139	WP_029057661.1	WP_029057661.1	5115
19.3443	20.2636	19.0898	20.0417	20.7474	20.9355						17	17	17	40.6	40.6	40.6	61.048	0	49.992	176440000	26	1.05718	0.147752	-1.00896	-1.8396	WP_029057662.1	WP_029057662.1	5116
21.7045	19.5374	22.2122	21.1106	21.2925	21.2057						16	16	16	42.5	42.5	42.5	39.409	0	66.841	264180000	51	0.0209301	0.964442	-0.051602	-0.0559748	WP_029057663.1	WP_029057663.1	5117
23.1189	23.0015	22.8263	22.8576	23.0512	23.0765						20	20	20	8.3	8.3	8.3	346.57	0	126.56	707890000	63	0.0399881	0.961207	-0.0128905	-0.061503	WP_029057666.1	WP_029057666.1	5119
23.6075	23.591	23.8145	23.8103	23.8382	23.7672						10	10	10	71.5	71.5	71.5	18.535	0	323.31	1486400000	79	0.831891	0.539317	-0.134205	-0.767724	WP_029057667.1	WP_029057667.1	5120
24.1251	24.1271	23.8238	23.9162	24.4238	24.6253						12	12	12	84.9	84.9	84.9	18.152	0	232.71	2285600000	221	0.562854	0.463594	-0.296434	-0.888051	WP_029057668.1	WP_029057668.1	5121
23.6525	23.5589	23.3332	23.4003	23.6465	23.988						8	8	8	64.7	64.7	64.7	18.461	0	43.738	1562100000	106	0.347504	0.664048	-0.163363	-0.553813	WP_029057669.1	WP_029057669.1	5122
24.045	23.7442	23.9422	23.835	24.281	24.2296						26	26	26	95.7	95.7	95.7	27.965	0	208.23	1557900000	117	0.544226	0.53876	-0.204735	-0.768936	WP_029057671.1	WP_029057671.1	5123
20.0769	19.8617	19.1014	20.0903	20.1454	20.2868						13	13	13	56.6	56.6	56.6	26.186	0	31.854	117250000	29	0.752813	0.305707	-0.494198	-1.23047	WP_029057672.1	WP_029057672.1	5124
18.6023	19.2912	22.0189	18.7341	21.5795	21.2966						18	18	18	50	50	50	48.675	0	39.393	277610000	38	0.153079	0.763493	-0.565962	-0.382137	WP_029057676.1	WP_029057676.1	5128
21.3628	21.3612	21.3717	21.409	21.3587	21.4517						15	15	15	70.5	70.5	70.5	26.879	0	14.666	282900000	39	0.694962	0.802497	-0.0412846	-0.324909	WP_029057677.1	WP_029057677.1	5129
25.8865	25.711	25.5374	25.6311	25.7397	25.7691						29	29	29	78	78	78	22.188	0	264.61	5657400000	230	0.00488517	0.997325	-0.00162824	-0.00778428	WP_029057690.1	WP_029057690.1	5139
23.5347	23.3279	22.4422	22.6231	23.0788	22.8336						10	10	10	71.9	71.9	71.9	9.5479	0	52.918	772770000	59	0.287648	0.662824	0.256413	0.557419	WP_029057691.1	WP_029057691.1	5140
22.2508	21.9995	21.9361	22.6948	22.7191	23.2393						24	24	24	90.2	90.2	90.2	37.218	0	143.61	871480000	95	1.81812	0.107944	-0.822252	-2.72321	WP_029057693.1	WP_029057693.1	5142
20.7848	20.356	19.7116	21.1453	21.4198	21.4348						15	15	15	50.9	50.9	50.9	44.733	0	50.647	252550000	35	1.49126	0.105143	-1.04918	-2.46411	WP_029057694.1	WP_029057694.1	5143
24.9137	25.0298	25.2939	25.3619	25.3303	25.1742						32	32	32	80.7	80.7	80.7	47.513	0	314.32	4180000000	156	0.762171	0.437656	-0.209689	-0.925505	WP_029057699.1	WP_029057699.1	5147
22.3755	22.8634	22.5459	22.2876	21.8194	22.4185						17	17	17	74.4	74.4	74.4	26.509	0	80.951	509480000	56	0.842351	0.291313	0.419782	1.26698	WP_029057702.1	WP_029057702.1	5150
21.0806	20.6182	19.2496	19.5529	20.3389	20.9955						25	25	25	75.4	75.4	75.4	44.722	0	29.703	124410000	42	0.0097115	0.987376	0.020347	0.0257568	WP_029057703.1	WP_029057703.1	5151
23.6853	23.734	23.6267	23.7946	23.4803	23.5971						19	19	19	68.8	68.8	68.8	35.31	0	100.05	1291600000	100	0.235417	0.823882	0.0579929	0.294616	WP_029057708.1	WP_029057708.1	5156
21.4817	20.4904	21.759	21.7564	22.6027	22.6153						19	19	19	61	61	61	46.963	0	99.237	565350000	73	1.06156	0.142751	-1.0811	-1.8685	WP_029057711.1	WP_029057711.1	5158
21.1894	19.9592	20.412	19.3664	21.3454	21.0723						14	14	14	76.4	76.4	76.4	22.028	0	28.051	331220000	34	0.0352199	0.938014	-0.074515	-0.0913359	WP_029057712.1	WP_029057712.1	5159
28.0182	27.9399	28.0816	27.989	28.2261	28.0989						84	84	84	89.6	89.6	89.6	63.153	0	323.31	26322000000	652	0.500065	0.682966	-0.091383	-0.508156	WP_029057713.1	WP_029057713.1	5160
21.6537	21.5261	21.645	21.3358	21.1954	21.6531						8	8	8	38.7	38.7	38.7	27.58	0	26.292	250710000	20	0.686457	0.466816	0.213478	0.884012	WP_029057714.1	WP_029057714.1	5161
20.0174	19.1455	18.6381	19.1851	20.354	20.513						7	7	7	36.8	36.8	36.8	35.558	0	43.237	108050000	16	0.574998	0.359317	-0.750364	-1.10193	WP_029057715.1	WP_029057715.1	5162
21.6937	21.4277	20.8581	19.0459	21.6072	20.9949						8	8	8	71.4	71.4	71.4	11.216	0	28.027	237260000	40	0.406727	0.484962	0.777129	0.85344	WP_029057716.1	WP_029057716.1	5163
19.9416	19.9745	19.3941	20.0588	19.7207	19.8181						4	4	4	27.1	27.1	27.1	12.802	0	10.664	84141000	17	0.169619	0.819681	-0.0958061	-0.305727	WP_029057717.1	WP_029057717.1	5164
21.6803	21.6708	20.2537	21.064	21.8929	21.1812						19	19	19	79.2	79.2	79.2	23.883	0	129.56	361850000	70	0.120009	0.83356	-0.177762	-0.277718	WP_029057719.1	WP_029057719.1	5165
22.0838	22.5479	21.6744	20.8922	21.5417	22.6389						10	10	10	82.1	82.1	82.1	11.535	0	31.861	500960000	44	0.292624	0.627395	0.411114	0.614765	WP_029057720.1	WP_029057720.1	5166
19.4581	19.4202	20.0144	19.4358	20.6619	20.6084						31	30	30	37.4	36.7	36.7	113.16	0.00055127	3.3458	139710000	33	0.611083	0.353384	-0.604451	-1.11153	WP_029057721.1	WP_029057721.1	5167
25.2531	25.051	25.0314	25.0059	25.3399	25.1236						42	42	42	60.6	60.6	60.6	51.041	0	323.31	3490000000	229	0.136429	0.878906	-0.0446447	-0.202202	WP_029057724.1	WP_029057724.1	5168
22.3076	21.2842	22.1531	21.9095	21.631	21.6592						25	25	25	82.3	82.3	82.3	26.667	0	65.959	391420000	53	0.213366	0.737579	0.181704	0.42197	WP_029057728.1	WP_029057728.1	5171
24.8455	24.013	24.6001	25.2978	25.8046	25.7387						40	40	40	91.6	91.6	91.6	57.959	0	293.86	4931200000	258	1.73308	0.0938438	-1.12752	-2.86341	WP_029057730.1	WP_029057730.1	5173
18.4289	18.8342	19.0542	19.244	21.7844	21.9313						7	7	7	17.3	17.3	17.3	56.272	0.00056243	3.6739	307010000	14	1.16806	0.115498	-2.21413	-2.23353	WP_029057733.1	WP_029057733.1	5176
20.0772	18.8682	18.6975	19.9192	19.7012	19.7667						8	8	8	88.6	88.6	88.6	8.055	0	6.4636	71632000	15	0.591738	0.371495	-0.581404	-1.0786	WP_029057736.1	WP_029057736.1	5177
24.605	24.5025	24.0781	24.0053	24.1168	24.067						19	19	19	91.1	91.1	91.1	13.754	0	131.44	1623200000	99	0.944622	0.293174	0.332116	1.25574	WP_029057738.1	WP_029057738.1	5179
23.6817	23.2192	23.61	23.7832	24.2516	24.1184						69	69	69	76	76	76	89.875	0	206.9	1898300000	214	1.28234	0.151214	-0.547405	-1.82357	WP_029057739.1	WP_029057739.1	5180
25.9325	25.9228	26.0442	26.1241	26.1162	26.0451						42	42	42	97	97	97	40.753	0	241.49	7002800000	330	1.29998	0.46926	-0.128586	-0.878607	WP_029057742.1	WP_029057742.1	5183
23.4822	24.2897	23.0848	22.9862	23.0086	22.7554						9	9	9	64.8	64.8	64.8	9.6361	0	64.671	686780000	71	0.900854	0.222493	0.702181	1.51462	WP_029057744.1	WP_029057744.1	5184
23.6217	23.4812	23.4645	23.35	23.5188	23.2924						25	25	25	83.3	83.3	83.3	27.914	0	111.11	1161900000	131	0.736748	0.553845	0.1354	0.734838	WP_029057745.1	WP_029057745.1	5185
19.8508	19.2501	18.9552	19.849	20.6145	20.7294						24	24	24	60	60	60	57.935	0	32.987	169920000	42	1.28413	0.118454	-1.04561	-2.17015	WP_029057748.1	WP_029057748.1	5188
22.4363	22.1406	21.4355	20.9015	22.1818	22.0505						14	14	14	100	100	100	14.457	0	127.3	503880000	52	0.22774	0.693555	0.292921	0.48539	WP_029057750.1	WP_029057750.1	5190
28.1011	27.8097	28.3509	28.5167	28.7129	28.6299						48	48	48	96.7	96.7	96.7	51.52	0	323.31	38774000000	769	1.48305	0.122618	-0.532551	-1.99914	WP_029057751.1	WP_029057751.1	5191
24.0649	24.1866	24.2328	24.5588	24.7247	24.6469						27	27	27	76.9	76.9	76.9	32.287	0	122.98	2515800000	136	2.64815	0.0944122	-0.482023	-2.8467	WP_029057752.1	WP_029057752.1	5192
27.8802	27.7874	28.0459	28.2325	28.3912	28.2044						66	66	66	75.4	75.4	75.4	54.942	0	323.31	31415000000	688	1.75413	0.139922	-0.371539	-1.90156	WP_029057753.1	WP_029057753.1	5193
24.5591	24.538	24.1329	24.0388	23.8281	24.1846						30	30	30	97.8	97.8	97.8	19.613	0	225.35	2145900000	147	1.06698	0.24469	0.392805	1.43871	WP_029057754.1	WP_029057754.1	5194
23.6822	18.8143	24.0394	22.8519	23.5806	24.0712						16	16	16	61.8	61.8	61.8	22.931	0	136.09	1446100000	62	0.313975	0.560775	-1.32261	-0.725851	WP_029057756.1	WP_029057756.1	5195
25.1928	25.5196	25.5187	25.5078	25.3502	25.1691						38	38	38	83.4	83.4	83.4	49.183	0	294.92	4286500000	298	0.176328	0.833532	0.0679938	0.276047	WP_029057760.1	WP_029057760.1	5198
26.4467	26.4657	26.1855	26.0381	26.1377	25.9784						47	47	47	75.6	75.6	75.6	53.687	0	323.31	6987900000	445	1.4388	0.210753	0.314555	1.55996	WP_029057762.1	WP_029057762.1	5200
25.413	25.3967	25.7574	25.6183	26.0292	25.8857						100	100	100	80	80	80	111.99	0	323.31	6737900000	511	0.891835	0.318234	-0.322032	-1.20015	WP_029057763.1	WP_029057763.1	5201
25.0273	24.9734	25.176	24.771	24.9732	24.9165						23	23	23	55.3	55.3	55.3	30.903	0	323.31	3923200000	172	0.941776	0.437736	0.172014	0.92764	WP_029057764.1	WP_029057764.1	5202
25.3866	25.214	25.7092	25.2341	25.2456	25.3629						39	39	39	76.7	76.7	76.7	42.122	0	323.31	4255100000	308	0.443381	0.623082	0.155711	0.620757	WP_029057765.1	WP_029057765.1	5203
25.4799	25.6103	25.8219	25.3736	25.6338	25.7361						25	25	25	72.2	72.2	72.2	33.612	0	198.54	5264900000	261	0.141791	0.861169	0.0562108	0.227662	WP_029057766.1	WP_029057766.1	5204
21.9837	21.7478	21.7872	21.7254	21.4711	21.7667						6	6	6	65.2	65.2	65.2	18.667	0	36.033	321100000	42	0.719319	0.486083	0.185189	0.85052	WP_029057769.1	WP_029057769.1	5206
21.6701	21.025	21.6407	21.3275	20.8648	20.9797						27	27	27	99.2	99.2	99.2	29.821	0	14.036	190130000	57	0.701785	0.359101	0.387971	1.10174	WP_029057772.1	WP_029057772.1	5209
24.9358	24.9269	25.2125	25.1269	25.147	25.0732						41	41	41	65	65	65	66.307	0	323.31	4060500000	233	0.397907	0.711392	-0.0906016	-0.461564	WP_029057774.1	WP_029057774.1	5211
19.3197	18.5584	19.5685	20.1295	19.3592	19.2257						6	6	6	32.4	32.4	32.4	14.783	0	9.7669	55007000	13	0.437238	0.502236	-0.422585	-0.82168	WP_029057779.1	WP_029057779.1	5214
19.5405	18.908	20.1043	19.4714	21.0497	20.832						25	25	25	49.4	49.4	49.4	44.461	0	26.447	177850000	36	0.706931	0.266975	-0.933456	-1.32834	WP_029057783.1	WP_029057783.1	5218
22.9016	22.6897	22.6334	22.8836	23.4139	23.3717						32	32	29	66.1	66.1	63	59.167	0	58.33	1096700000	98	1.19904	0.188865	-0.481504	-1.66756	WP_029057785.1	WP_029057785.1	5220
21.6188	21.4485	21.8124	21.1898	21.2736	21.2713						11	11	11	48.6	48.6	48.6	19.553	0	38.679	327250000	40	1.60851	0.149179	0.381612	1.82882	WP_029057791.1	WP_029057791.1	5223
21.3113	20.2577	20.2739	19.6495	20.337	20.6107						16	16	16	55.4	55.4	55.4	32.406	0	58.467	148120000	43	0.388116	0.544474	0.415204	0.753822	WP_029057792.1	WP_029057792.1	5224
22.3022	21.5599	21.9747	22.008	21.8931	22.2682						22	22	22	83.5	83.5	83.5	36.133	0	57.748	397680000	65	0.173685	0.802972	-0.110847	-0.324363	WP_029057793.1	WP_029057793.1	5225
23.4161	22.0044	22.872	22.8063	23.6495	23.4604						29	29	29	91.3	91.3	91.3	23.346	0	110.71	1362400000	117	0.486688	0.437668	-0.541227	-0.926788	WP_029057794.1	WP_029057794.1	5226
18.5193	20.3194	19.6263	21.3183	21.4715	21.2404						14	14	14	65.9	65.9	65.9	27.551	0	33.947	284490000	26	1.60766	0.0890407	-1.85508	-2.95129	WP_029057795.1	WP_029057795.1	5227
27.3614	27.2141	27.4749	27.5289	27.4592	27.3064						83	83	83	76.3	76.3	76.3	75.923	0	323.31	17367000000	775	0.335478	0.752135	-0.0813554	-0.406621	WP_029057797.1	WP_029057797.1	5228
24.6691	24.1566	23.8288	23.4296	23.6171	23.4409						18	18	18	88.8	88.8	88.8	10.193	0	106.98	1358300000	114	1.34104	0.119961	0.722336	2.05247	WP_029057798.1	WP_029057798.1	5229
25.8338	25.7119	25.929	26.2175	26.2527	26.1665						110	110	110	90.4	90.4	90.4	96.696	0	323.31	7628200000	538	2.33702	0.110807	-0.387354	-2.31066	WP_029057800.1	WP_029057800.1	5231
24.9341	24.4588	24.9371	25.2099	25.6729	25.5484						38	38	38	84.1	84.1	84.1	42.011	0	323.31	5374400000	292	1.53369	0.114661	-0.70039	-2.2543	WP_029057802.1	WP_029057802.1	5233
22.9147	22.229	21.3296	21.1697	22.39	22.2161						14	14	14	89.6	89.6	89.6	14.884	0	82.772	491940000	44	0.144709	0.793933	0.232482	0.333747	WP_029057803.1	WP_029057803.1	5234
19.0879	20.1278	19.7882	20.1896	19.7147	19.7849						5	5	5	25.6	25.6	25.6	17.421	0	6.4642	90205000	9	0.268786	0.679101	-0.228433	-0.51911	WP_029057812.1	WP_029057812.1	5240
23.9041	23.7126	23.9629	23.9373	24.233	24.0216						30	30	30	53.5	53.5	53.5	47.715	0	108.71	1559200000	113	0.814928	0.431408	-0.204116	-0.945223	WP_029057813.1	WP_029057813.1	5241
21.7146	21.2997	21.8031	21.2131	20.927	21.2842						7	7	7	39.2	39.2	39.2	19.681	0	37.731	238320000	36	1.15109	0.201899	0.464351	1.60283	WP_029057814.1	WP_029057814.1	5242
22.4232	22.0952	22.1085	22.0825	22.4507	22.5524						9	9	9	51.8	51.8	51.8	20.147	0	27.622	595210000	37	0.356461	0.666701	-0.152861	-0.548856	WP_029057819.1	WP_029057819.1	5245
21.8161	21.4801	22.3072	21.6772	22.0813	22.184						30	30	30	48.7	48.7	48.7	86.917	0	53.052	470640000	51	0.147215	0.824478	-0.113046	-0.293123	WP_029057823.1	WP_029057823.1	5248
20.15	19.351	21.4219	21.07	21.1319	21.9991						29	29	29	64.1	64.1	64.1	40.245	0	28.152	288360000	55	0.744657	0.248	-1.09267	-1.41268	WP_029057825.1	WP_029057825.1	5250
18.8045	19.7884	18.4795	20.3214	20.707	21.2599						13	13	13	67.6	67.6	67.6	30.8	0	12.611	151040000	22	1.65562	0.0881695	-1.73865	-3.00514	WP_029057826.1	WP_029057826.1	5251
26.3597	26.2625	26.2335	26.2426	26.2604	26.0537						64	64	64	83.5	83.5	83.5	68.927	0	323.31	7030000000	452	0.582038	0.659078	0.0996571	0.565124	WP_029057827.1	WP_029057827.1	5252
21.6201	21.5148	21.6306	21.9658	22.2381	22.2776						21	21	21	65.5	65.5	65.5	30.39	0	210.09	538090000	73	2.26189	0.104029	-0.571986	-2.79336	WP_029057829.1	WP_029057829.1	5254
23.6754	23.3802	23.544	23.524	23.8483	23.7697						19	19	19	90.1	90.1	90.1	21.066	0	110.19	1647800000	130	0.627184	0.528795	-0.180787	-0.786886	WP_029057843.1	WP_029057843.1	5266
19.6077	19.949	19.3576	19.9644	21.5923	21.9389						13	13	13	45	45	45	56.445	0	5.4461	272390000	20	1.13571	0.11687	-1.52711	-2.0852	WP_029057844.1	WP_029057844.1	5267
20.3442	20.5519	19.2065	20.0394	19.7041	19.8012						14	14	14	76.7	76.7	76.7	29.138	0	11.654	112870000	30	0.162666	0.784726	0.185968	0.350971	WP_029057845.1	WP_029057845.1	5268
21.919	21.4186	22.4029	21.3367	22.5583	22.1477						17	17	17	66.8	66.8	66.8	23.271	0	90.845	568750000	42	0.0774516	0.889603	-0.100697	-0.180538	WP_029057846.1	WP_029057846.1	5269
26.2709	25.9568	26.5975	26.1425	26.2386	26.2266						38	38	38	80.5	80.5	80.5	53.786	0	323.31	7570300000	317	0.143483	0.846968	0.0724754	0.252171	WP_029057854.1	WP_029057854.1	5274
20.2074	19.7471	18.5033	19.4435	20.8275	20.4306						15	15	15	41.1	41.1	41.1	42.411	0	27.72	139590000	23	0.499083	0.40952	-0.747924	-0.991288	WP_029057860.1	WP_029057860.1	5279
22.7665	22.4207	22.7816	22.4685	22.804	22.3415						19	19	19	54.9	54.9	54.9	39.718	0	131.35	654790000	63	0.259614	0.738822	0.11828	0.420267	WP_029057862.1	WP_029057862.1	5281
19.6444	19.4394	18.0736	19.8837	20.6373	21.7153						18	18	18	36.5	36.5	36.5	71.867	0.66597	-0.92767	228370000	24	1.09808	0.119571	-1.69297	-2.05225	WP_029057869.1	WP_029057869.1	5284
18.5796	19.5655	19.3994	19.4345	19.8965	20.7069						16	16	16	42.9	42.9	42.9	53.738	0.94026	-3.2429	114000000	19	0.798783	0.245408	-0.83111	-1.43101	WP_029057873.1	WP_029057873.1	5288
19.0482	20.1281	19.2115	19.4389	17.5384	17.8536						11	9	9	28.1	25.2	25.2	47.254	0.0016216	2.8656	13766000	10	0.80989	0.218984	1.18564	1.52532	WP_029057878.1	WP_029057878.1	5293
21.5957	21.772	22.6241	19.8358	21.409	21.6454						9	9	9	34.3	34.3	34.3	35.529	0	42.053	282460000	33	0.727531	0.259268	1.03384	1.37727	WP_029057891.1	WP_029057891.1	5304
19.0211	20.609	18.845	20.2249	21.9591	21.6006						16	16	16	48.6	48.6	48.6	46.392	0	15.2	285880000	27	1.07945	0.1201	-1.76984	-2.03254	WP_029057893.1	WP_029057893.1	5305
22.3986	21.8461	22.2895	22.5396	22.9884	22.5998						25	25	25	79.1	79.1	79.1	37.235	0	63.663	674490000	72	1.13633	0.190209	-0.531218	-1.66082	WP_029057894.1	WP_029057894.1	5306
21.2411	20.8843	20.5442	19.4818	20.7366	20.5785						11	11	11	77.3	77.3	77.3	16.696	0	66.53	139700000	33	0.635405	0.337214	0.624214	1.14977	WP_029057928.1	WP_029057928.1	5327
21.9416	19.2248	21.6595	21.9036	21.496	17.9916						18	18	18	34.7	34.7	34.7	55.537	0	36.212	147450000	33	0.114893	0.822365	0.478266	0.296732	WP_029057936.1	WP_029057936.1	5333
22.5708	22.0864	20.6241	20.014	21.641	21.9574						6	6	6	45.1	45.1	45.1	14.143	0	38.514	357440000	26	0.264559	0.642624	0.556295	0.592098	WP_029057937.1	WP_029057937.1	5334
22.081	22.0208	21.5857	21.5876	21.9366	21.6034						12	12	12	71.7	71.7	71.7	22.179	0	29.275	271790000	41	0.410467	0.612812	0.186626	0.636644	WP_029057938.1	WP_029057938.1	5335
26.6488	26.3753	26.537	27.3279	27.5894	27.3995						37	37	37	96.7	96.7	96.7	40.76	0	323.31	16492000000	336	2.92945	0.0723704	-0.918559	-4.34689	WP_029057939.1	WP_029057939.1	5336
23.753	23.4057	23.9411	23.5052	23.535	23.7975						22	22	22	64.9	64.9	64.9	25.333	0	159.26	1481000000	109	0.182646	0.818221	0.0873648	0.309548	WP_029057940.1	WP_029057940.1	5337
22.9888	22.5545	21.2505	21.8003	22.1702	22.0932						10	10	10	65.6	65.6	65.6	6.9199	0	52.746	601680000	60	0.172341	0.762684	0.243333	0.383606	WP_029057941.1	WP_029057941.1	5338
19.7007	19.653	19.3645	19.8623	19.1153	18.9685						13	13	13	53.7	53.7	53.7	18.774	0	22.771	51629000	24	0.362928	0.607059	0.257384	0.65	WP_029057944.1	WP_029057944.1	5341
25.2765	25.234	25.6551	25.4182	25.4994	25.272						53	53	53	85.2	85.2	85.2	45.522	0	281.62	4170300000	281	0.0177057	0.985247	-0.007967	-0.0319339	WP_029057949.1	WP_029057949.1	5344
22.3306	22.1795	22.503	22.5063	22.6413	22.1541						18	18	18	64	64	64	39.008	0	59.637	713170000	56	0.216724	0.783931	-0.0962149	-0.352838	WP_029057953.1	WP_029057953.1	5348
18.5971	18.3122	20.2994	20.4281	20.1898	20.3562						14	14	14	47	47	47	33.664	0	17.267	133150000	34	0.940136	0.174149	-1.25514	-1.73266	WP_029057954.1	WP_029057954.1	5349
23.3034	23.3576	23.7074	23.8144	24.1332	24.0755						46	46	46	77.8	77.8	77.8	66.289	0	189.89	1622300000	162	1.58192	0.115639	-0.551577	-2.12036	WP_029057958.1	WP_029057958.1	5352
26.2023	25.902	26.6158	26.3761	26.5829	26.4968						154	154	154	82.3	82.3	82.3	177.12	0	323.31	9056700000	641	0.496791	0.53489	-0.245229	-0.777398	WP_029057960.1	WP_029057960.1	5353
21.3436	19.7691	21.6644	18.7896	21.5079	21.6894						17	16	16	57	56.6	56.6	33.46	0	25.984	344030000	30	0.0843753	0.867935	0.263375	0.218449	WP_029057962.1	WP_029057962.1	5354
22.3102	19.3683	18.9077	19.5629	21.4713	21.8061						9	9	9	67.2	67.2	67.2	19.267	0	12.186	262590000	20	0.231255	0.667791	-0.751357	-0.54671	WP_029057966.1	WP_029057966.1	5358
21.7878	20.0664	21.5826	21.5532	21.637	21.4042						15	15	15	89.4	89.4	89.4	25.279	0	45.018	244490000	39	0.284401	0.643753	-0.385879	-0.596324	WP_029057967.1	WP_029057967.1	5359
20.3216	20.7836	20.4054	20.2238	20.9382	20.8599						13	13	13	56.4	56.4	56.4	41.927	0	20.408	228150000	32	0.253226	0.710496	-0.170441	-0.464218	WP_029057972.1	WP_029057972.1	5364
21.601	20.7262	20.8871	20.8311	21.5654	20.8209						14	14	14	51	51	51	31.323	0	38.494	311780000	46	0.000913387	0.999791	-0.0010217	-0.00219849	WP_029057975.1	WP_029057975.1	5367
23.9096	23.3335	23.45	22.7027	23.0163	23.072						20	20	20	92.8	92.8	92.8	16.787	0	52.192	937240000	72	1.40609	0.119348	0.63402	2.04451	WP_029057977.1	WP_029057977.1	5368
23.2575	23.062	23.1413	23.5929	23.9129	23.7401						30	30	28	71.7	71.7	70.1	47.279	0	75.391	1237800000	112	2.26857	0.0949147	-0.594968	-2.8534	WP_029057980.1	WP_029057980.1	5371
21.6737	21.7054	21.738	22.2428	21.848	21.7689						24	24	24	78.5	78.5	78.5	39.212	0	30.333	399760000	53	0.771658	0.404246	-0.247544	-0.999139	WP_029057982.1	WP_029057982.1	5372
24.4394	23.6738	24.5954	25.1297	25.449	25.5022						34	34	34	88.7	88.7	88.7	37.477	0	323.31	4462500000	235	1.6637	0.104851	-1.12409	-2.75768	WP_029057988.1	WP_029057988.1	5377
20.3378	20.6328	20.694	21.0385	22.5745	21.4496						36	36	36	52.1	52.1	52.1	69.945	0	60.072	454610000	78	1.12839	0.125437	-1.13267	-1.97996	WP_029057990.1	WP_029057990.1	5378
24.1303	23.9483	24.395	24.4181	24.2743	24.2959						30	30	30	99.7	99.7	99.7	36.993	0	134.12	2203100000	144	0.554086	0.561179	-0.171577	-0.723401	WP_029057991.1	WP_029057991.1	5379
21.2775	19.7639	21.1999	21.3842	21.3201	21.2467						11	11	11	30.5	30.5	30.5	48.519	0	30.403	284120000	32	0.504958	0.422956	-0.56992	-0.959902	WP_029057994.1	WP_029057994.1	5381
22.7648	21.9713	22.8068	22.8149	23.4293	23.3621						20	20	20	73.4	73.4	73.4	38.003	0	140.2	1095400000	81	0.96372	0.208374	-0.68782	-1.58398	WP_029057997.1	WP_029057997.1	5383
22.2616	23.11	22.1342	19.2009	22.0492	21.8814						11	11	11	77.1	77.1	77.1	18.344	0	25.016	488340000	32	0.681797	0.262717	1.45808	1.35986	WP_029058003.1	WP_029058003.1	5387
23.0188	23.1672	24.0958	23.5186	24.0031	23.7076						25	25	25	53	53	53	47.706	0	74.879	1665300000	146	0.360449	0.587725	-0.315815	-0.678726	WP_029058004.1	WP_029058004.1	5388
23.8725	23.3461	24.815	24.7249	24.8718	24.6698						62	62	62	85.9	85.9	85.9	73.232	0	317.42	2743100000	209	0.792073	0.253012	-0.744311	-1.39413	WP_029058005.1	WP_029058005.1	5389
20.4035	20.2172	19.0379	20.4749	20.8639	20.6035						11	11	11	67.8	67.8	67.8	25.296	0	47.636	163110000	25	0.794319	0.251979	-0.761236	-1.4029	WP_029058006.1	WP_029058006.1	5390
22.3113	21.9786	21.5327	21.5695	21.804	22.1515						9	9	9	74.5	74.5	74.5	15.196	0	19.293	399400000	39	0.129275	0.843147	0.0992368	0.259875	WP_029058011.1	WP_029058011.1	5393
19.8559	19.8086	19.4595	19.1921	20.246	20.3648						15	15	15	67.8	67.8	67.8	30.184	0	21.356	115450000	25	0.225002	0.71147	-0.226305	-0.458944	WP_029058012.1	WP_029058012.1	5394
21.9151	21.6556	21.4573	21.2084	21.2454	21.5088						14	14	14	80.5	80.5	80.5	20.468	0	36.476	231050000	47	1.0239	0.263404	0.35514	1.35117	WP_029058016.1	WP_029058016.1	5398
23.6568	23.6809	24.0543	24.0732	24.0096	24.0388						57	57	57	62.7	62.7	62.7	97.97	0	151.69	1782600000	175	0.870628	0.379188	-0.243201	-1.05741	WP_029058017.1	WP_029058017.1	5399
19.2495	20.9488	19.1559	18.7721	18.9982	18.5924						15	15	15	58.8	58.8	58.8	24.572	0	14.313	124660000	29	0.772869	0.244752	0.9972	1.4361	WP_029058018.1	WP_029058018.1	5400
23.3886	23.3914	23.3856	23.5686	23.5379	23.4868						43	43	43	73.3	73.3	73.3	53.961	0	207.26	1238400000	130	2.39971	0.337233	-0.14254	-1.15022	WP_029058020.1	WP_029058020.1	5401
24.7566	24.8466	24.3021	23.9659	24.0331	24.1781						16	16	16	81.1	81.1	81.1	14.14	0	74.324	1911900000	126	1.48471	0.120421	0.576087	2.05917	WP_029058021.1	WP_029058021.1	5402
25.987	25.7425	25.234	25.2245	25.3766	25.4254						25	25	25	86.3	86.3	86.3	17.655	0	178.83	4295100000	175	0.609456	0.430622	0.31237	0.946907	WP_029058025.1	WP_029058025.1	5404
23.0897	22.9417	22.8879	22.4971	22.0225	22.3698						14	14	14	78.3	78.3	78.3	20.361	0	70.496	516190000	60	1.92876	0.104835	0.676643	2.66255	WP_029058029.1	WP_029058029.1	5407
21.4944	19.6753	18.473	20.4313	22.4198	21.9337						30	30	30	46.9	46.9	46.9	94.899	0	30.915	565970000	42	0.739706	0.232504	-1.714	-1.47406	WP_029058031.1	WP_029058031.1	5409
23.1883	23.2044	23.4082	23.5462	23.7388	23.6034						42	42	42	67.9	67.9	67.9	51.226	0	178.22	1537700000	156	1.78727	0.13957	-0.362483	-1.89841	WP_029058034.1	WP_029058034.1	5412
24.2379	23.9079	23.9653	24.4364	24.4371	24.6051						19	19	19	61.1	61.1	61.1	32.106	0	175.79	2085000000	105	1.76409	0.116259	-0.455854	-2.10826	WP_029058038.1	WP_029058038.1	5415
26.1847	25.7696	26.6302	26.0477	26.2607	26.4569						11	11	11	58.5	58.5	58.5	31.88	0	262.52	8008300000	148	0.077129	0.902784	-0.0602919	-0.160714	WP_029058039.1	WP_029058039.1	5416
25.9049	25.7289	26.1347	25.8879	25.9647	25.8462						34	34	34	78.3	78.3	78.3	26.604	0	323.31	6712700000	292	0.066147	0.927434	0.0232519	0.104493	WP_029058040.1	WP_029058040.1	5417
22.1142	22.198	21.8963	21.6242	21.7501	22.181						12	12	12	77.5	77.5	77.5	20.866	0	64.976	498930000	63	0.497523	0.547078	0.217747	0.748113	WP_029058042.1	WP_029058042.1	5419
22.6925	22.3187	22.8709	22.8253	23.423	23.4744						33	33	33	78.4	78.4	78.4	44.706	0	59.761	1130500000	89	1.09138	0.185297	-0.613576	-1.68412	WP_029058045.1	WP_029058045.1	5421
20.8348	20.654	21.0645	19.2654	20.7347	20.795						14	14	14	70.8	70.8	70.8	32.475	0	27.518	181050000	39	0.497726	0.425386	0.586053	0.954406	WP_029058046.1	WP_029058046.1	5422
22.0524	22.1965	22.0779	19.6197	21.919	21.8855						11	11	11	81.7	81.7	81.7	22.03	0	124.73	504200000	49	0.563605	0.348323	0.967517	1.12213	WP_029058054.1	WP_029058054.1	5426
26.1144	26.204	26.5332	26.5534	26.5141	26.347						56	56	56	70.6	70.6	70.6	71.157	0	323.31	8644400000	369	0.589368	0.535782	-0.187618	-0.774727	WP_029058059.1	WP_029058059.1	5429
23.3728	22.7826	23.0985	23.8704	24.1836	23.7409						22	22	22	52.1	52.1	52.1	49.78	0	56.569	1928500000	56	1.76856	0.10664	-0.847008	-2.68653	WP_029058060.1	WP_029058060.1	5430
22.6611	21.7645	22.5488	19.3267	22.9873	23.0918						22	22	22	63.6	63.6	63.6	50.399	0	125.74	798340000	75	0.153911	0.763134	0.52286	0.381733	WP_029058062.1	WP_029058062.1	5432
22.1611	21.6258	21.5602	20.2264	21.0198	21.3625						8	8	8	45.7	45.7	45.7	35.677	0	38.594	183630000	23	1.11043	0.142059	0.912794	1.87604	WP_029058065.1	WP_029058065.1	5435
18.2444	20.7541	19.2845	19.0533	20.6065	20.17						5	5	5	10.3	10.3	10.3	63.012	0	11.954	107700000	9	0.234946	0.67172	-0.515586	-0.535685	WP_029058072.1	WP_029058072.1	5440
24.0257	24.0068	24.2973	24.1945	24.5495	24.3582						49	49	49	80.7	80.7	80.7	65.833	0	272.12	2417600000	225	0.861125	0.372268	-0.257487	-1.07718	WP_029058075.1	WP_029058075.1	5443
24.6152	24.6533	24.7795	25.2866	25.0895	24.9839						34	34	34	78.5	78.5	78.5	44.048	0	314.85	3137100000	223	1.8988	0.117978	-0.437364	-2.1688	WP_029058076.1	WP_029058076.1	5444
22.4648	22.4775	22.427	22.1708	22.5495	22.3393						28	28	28	82.3	82.3	82.3	33.374	0	100.42	625280000	108	0.39421	0.693552	0.103231	0.490185	WP_029058080.1	WP_029058080.1	5446
24.7091	24.4094	24.6351	24.8599	25.0253	25.1942						33	33	33	85.1	85.1	85.1	41.831	0	323.31	3520200000	171	1.54299	0.140179	-0.44194	-1.90466	WP_029058086.1	WP_029058086.1	5451
20.597	18.8601	20.7811	20.8752	20.9028	20.9084						12	12	12	57.2	57.2	57.2	31.404	0	65.952	189950000	30	0.596391	0.337983	-0.816039	-1.14608	WP_029058089.1	WP_029058089.1	5453
25.5236	24.8705	25.5187	25.5139	25.6722	25.7449						32	32	32	84.3	84.3	84.3	39.566	0	323.31	5060100000	194	0.678308	0.387244	-0.339398	-1.03685	WP_029058090.1	WP_029058090.1	5454
22.2131	22.1536	22.3512	22.2421	22.5754	22.7015						18	18	18	72.3	72.3	72.3	35.834	0	121.28	716100000	71	0.830826	0.374076	-0.266995	-1.07225	WP_029058093.1	WP_029058093.1	5457
25.8755	25.7604	26.3158	25.5705	25.8741	25.7154						80	80	80	71.4	71.4	71.4	99.636	0	323.31	5459100000	451	0.622696	0.450421	0.263927	0.908169	WP_029058105.1	WP_029058105.1	5468
18.8009	20.8637	20.2271	18.561	19.442	18.7311						10	10	10	49.5	49.5	49.5	23.679	0	12.768	49597000	24	0.72206	0.259145	1.05251	1.37246	WP_029058107.1	WP_029058107.1	5469
18.5237	19.6412	18.4081	19.6969	19.1169	19.6669						8	8	8	28.4	28.4	28.4	34.25	0	5.3758	67537000	11	0.660595	0.326304	-0.635936	-1.18635	WP_029058110.1	WP_029058110.1	5472
23.2656	23.3006	23.6256	23.2915	23.2691	23.5589						29	29	29	69.9	69.9	69.9	56.28	0	160.35	1142500000	108	0.0562505	0.931899	0.0240485	0.0971061	WP_029058116.1	WP_029058116.1	5477
19.68	19.0342	18.8843	19.7597	20.0303	20.1843						13	13	13	36.4	36.4	36.4	45.061	0	28.851	96769000	18	1.35182	0.115239	-0.791932	-2.1183	WP_029058117.1	WP_029058117.1	5478
21.8233	19.2387	21.0273	20.0017	19.3051	20.5797						11	11	11	60.1	60.1	60.1	21.351	0.026432	1.2927	83419000	14	0.360905	0.53513	0.734268	0.774207	WP_029058119.1	WP_029058119.1	5479
24.0151	23.4446	24.0523	23.6424	24.2934	24.1208						36	36	36	86.3	86.3	86.3	32.913	0	215.12	1902900000	136	0.261538	0.696161	-0.181575	-0.481939	WP_029058120.1	WP_029058120.1	5480
19.1244	20.1703	19.6736	19.5	21.5459	21.7092						23	23	23	44.3	44.3	44.3	75.261	0	7.3565	264270000	33	0.750811	0.242884	-1.26227	-1.4471	WP_029058125.1	WP_029058125.1	5483
24.8362	24.9126	24.9901	25.3915	25.5431	25.2583						51	51	51	82.2	82.2	82.2	47.216	0	323.31	5513200000	316	2.18132	0.106495	-0.484642	-2.50483	WP_029058127.1	WP_029058127.1	5484
23.6878	23.2514	23.6018	22.8965	23.7173	23.8543						27	27	27	91.4	91.4	91.4	37.291	0	75.516	1338400000	96	0.0248596	0.964431	0.0243212	0.056892	WP_029058129.1	WP_029058129.1	5486
21.6825	20.1756	21.2687	19.3983	21.3653	20.9758						10	10	10	65.2	65.2	65.2	21.414	0	20.689	231300000	32	0.243204	0.669391	0.462493	0.543611	WP_029058131.1	WP_029058131.1	5487
23.4473	23.1288	23.4037	23.6475	24.1008	23.8142						34	34	34	96.6	96.6	96.6	36.177	0	158.48	1643800000	152	1.4759	0.124793	-0.527553	-1.98536	WP_029058135.1	WP_029058135.1	5491
22.7135	22.6753	22.353	22.6745	22.9324	22.6749						18	18	18	66.7	66.7	66.7	29.91	0	82.536	773130000	78	0.558134	0.550116	-0.180004	-0.740716	WP_029058137.1	WP_029058137.1	5492
25.0904	25.1247	25.5256	25.6796	25.7851	25.5789						34	34	34	73	73	73	42.893	0	258.56	4785600000	201	1.33791	0.175551	-0.434283	-1.72439	WP_029058138.1	WP_029058138.1	5493
22.9714	22.0693	22.6198	21.2934	22.3719	22.7124						20	20	20	70.4	70.4	70.4	18.696	0	70.84	591480000	64	0.354388	0.571096	0.427591	0.710478	WP_029058139.1	WP_029058139.1	5494
24.7407	24.5932	24.9948	25.0069	25.0216	25.0614						58	58	58	85.5	85.5	85.5	82.205	0	319.37	3548700000	245	1.00549	0.336365	-0.253747	-1.16183	WP_029058144.1	WP_029058144.1	5496
22.3093	21.2375	22.4189	22.613	22.8278	23.1379						15	15	15	55.2	55.2	55.2	43.631	0	76.129	741290000	57	1.00527	0.177135	-0.870996	-1.71962	WP_029058145.1	WP_029058145.1	5497
18.3833	19.6746	19.1832	20.3818	18.2271	17.8088						10	10	10	22.4	22.4	22.4	58.823	0.0026137	2.2907	27958000	12	0.112897	0.832623	0.274452	0.279628	WP_029058157.1	WP_029058157.1	5507
20.9273	19.84	21.5924	19.479	21.0917	20.938						11	11	11	22.4	22.4	22.4	58.311	0	87.297	137860000	25	0.145471	0.789723	0.283669	0.344045	WP_029058158.1	WP_029058158.1	5508
22.431	22.0536	23.0337	19.9706	21.9086	21.8814						15	15	15	52.1	52.1	52.1	35.013	0	51.369	360270000	41	0.82681	0.211181	1.25256	1.56153	WP_029058164.1	WP_029058164.1	5514
21.9622	22.0056	22.321	22.0092	22.4273	22.1048						14	14	14	78.8	78.8	78.8	23.432	0	25.267	573640000	73	0.189958	0.815913	-0.0842031	-0.312255	WP_029058167.1	WP_029058167.1	5516
20.8395	19.5785	19.4324	19.2544	20.5555	20.7567						14	14	14	67.4	67.4	67.4	35.613	0	23.62	177650000	25	0.135731	0.809264	-0.238767	-0.318778	WP_029058170.1	WP_029058170.1	5519
20.3644	19.9456	18.9512	18.8657	20.8742	20.2961						11	11	11	42.3	42.3	42.3	36.029	0	18.361	188530000	23	0.130088	0.81673	-0.258254	-0.311383	WP_029058171.1	WP_029058171.1	5520
21.6678	19.0732	21.0991	21.8919	23.5451	23.2697						50	50	50	63.9	63.9	63.9	108.09	0	133.18	967690000	107	1.14647	0.115316	-2.28887	-2.20321	WP_029058174.1	WP_029058174.1	5523
22.9664	22.8498	23.1816	23.0097	23.0265	23.0364						23	23	23	78.7	78.7	78.7	25.73	0	40.467	798260000	79	0.0912361	0.915516	-0.0249659	-0.126414	WP_029058176.1	WP_029058176.1	5525
22.3706	19.8529	23.4291	19.5901	23.3557	23.4063						45	45	45	48.3	48.3	48.3	105.47	0	69.136	410010000	57	0.0484451	0.911418	-0.233155	-0.133245	WP_029058180.1	WP_029058180.1	5529
23.3878	23.1275	23.2333	22.8146	22.9433	22.8008						17	17	17	48.2	48.2	48.2	36.25	0	101.29	714250000	109	1.96527	0.115864	0.39663	2.1079	WP_029058182.1	WP_029058182.1	5531
22.4166	21.7487	23.5767	19.4251	17.9149	20.0028						14	14	14	42.1	42.1	42.1	39.131	0	26.289	159990000	25	1.87265	0.0675493	3.46637	3.76717	WP_029058193.1	WP_029058193.1	5540
23.5592	22.3701	23.4681	23.2565	23.536	23.1145						27	27	27	61	61	61	49.384	0	58.436	1296300000	64	0.158571	0.790852	-0.169855	-0.338599	WP_029058195.1	WP_029058195.1	5542
22.2709	21.9011	21.8291	21.3952	21.5522	21.6772						16	16	16	57.4	57.4	57.4	40.676	0	143.23	292090000	64	1.34659	0.163971	0.458858	1.76936	WP_029058196.1	WP_029058196.1	5543
21.8184	20.1228	21.0393	21.435	21.2228	21.2155						18	18	18	56	56	56	29.038	0	32.602	236190000	44	0.236368	0.689287	-0.297616	-0.499985	WP_029058197.1	WP_029058197.1	5544
22.0309	22.1259	22.292	21.895	22.2023	22.1519						17	17	17	42.6	42.6	42.6	35.323	0	62.405	391670000	53	0.211446	0.822562	0.0665175	0.299643	WP_029058198.1	WP_029058198.1	5545
19.7953	19.0674	19.6952	19.0162	19.9255	20.5631						14	14	14	52.6	52.6	52.6	36.398	0	30.768	100440000	29	0.248245	0.679676	-0.315636	-0.523149	WP_029058200.1	WP_029058200.1	5547
20.4538	19.3143	20.4365	19.6425	20.0819	20.2527						8	8	8	52.3	52.3	52.3	27.24	0	30.056	113670000	21	0.063	0.907938	0.0758686	0.146314	WP_029058202.1	WP_029058202.1	5549
19.3537	19.3797	20.0673	19.5855	21.1174	21.7055						11	11	11	65.8	65.8	65.8	25.051	0	27.103	240880000	23	0.827351	0.212734	-1.20255	-1.55428	WP_029058203.1	WP_029058203.1	5550
19.5894	19.8263	17.4293	20.4389	19.9129	19.7997						9	9	9	34.3	34.3	34.3	23.109	0	20.24	98538000	25	0.630273	0.301511	-1.10216	-1.24171	WP_029058204.1	WP_029058204.1	5551
20.5103	19.6421	20.5615	20.8401	20.6141	18.0536						7	7	7	43.1	43.1	43.1	21.44	0	31.045	132290000	20	0.160195	0.762921	0.402016	0.385805	WP_029058205.1	WP_029058205.1	5552
18.1882	18.9507	19.2565	18.9381	21.4409	21.7614						17	17	17	51	51	51	42.926	0	16.194	272370000	19	0.945748	0.149115	-1.91502	-1.82847	WP_029058207.1	WP_029058207.1	5553
23.153	21.6578	22.5764	22.5632	23.5364	23.2575						35	35	35	87.7	87.7	87.7	44.605	0	135.02	1077100000	109	0.556836	0.380874	-0.656623	-1.0544	WP_029058209.1	WP_029058209.1	5555
19.4066	20.3256	17.6332	20.2481	19.3928	19.838						5	5	5	45.9	45.9	45.9	15.002	0.0021175	2.4962	59812000	7	0.353871	0.541709	-0.704507	-0.759275	WP_029058215.1	WP_029058215.1	5559
21.1575	19.0995	21.6699	21.0717	22.3312	21.8628						37	37	37	67.1	67.1	67.1	55.861	0	27.637	439830000	53	0.570785	0.337722	-1.11293	-1.15068	WP_029058219.1	WP_029058219.1	5562
21.2406	19.4693	21.4175	18.6423	21.9909	22.0111						18	18	18	59.7	59.7	59.7	46.541	0	33.803	407180000	55	0.0460022	0.916642	-0.17228	-0.124772	WP_029058221.1	WP_029058221.1	5564
19.9619	18.8622	19.7681	19.7299	20.4779	20.6114						14	14	14	31.7	31.7	31.7	60.541	0	9.0808	113360000	21	0.785532	0.258393	-0.742364	-1.38495	WP_029058227.1	WP_029058227.1	5566
18.3907	19.3862	19.7273	19.6734	20.3104	20.3249						11	11	11	41.5	41.5	41.5	44.168	0	5.7801	115040000	16	0.962418	0.185501	-0.934841	-1.68484	WP_029058232.1	WP_029058232.1	5567
21.9591	21.7716	22.0639	21.9344	22.0288	22.1572						17	17	17	63.3	63.3	63.3	25.693	0	36.073	440910000	65	0.433894	0.678438	-0.108591	-0.524181	WP_029058238.1	WP_029058238.1	5570
24.1176	24.079	24.1394	24.0564	23.9206	23.7631						22	22	22	71.2	71.2	71.2	40.699	0	174.3	1615800000	101	1.07881	0.377668	0.198622	1.06472	WP_029058250.1	WP_029058250.1	5580
21.3128	21.2875	21.6744	21.8098	21.6536	21.6339						25	25	25	54.8	54.8	54.8	43.733	0	80.298	324030000	74	0.937246	0.337894	-0.274206	-1.15793	WP_029058251.1	WP_029058251.1	5581
26.914	26.8267	27.3313	27.9468	27.8806	27.9799						45	45	45	97.5	97.5	97.5	33.815	0	323.31	22362000000	601	2.34479	0.0689302	-0.911736	-3.5281	WP_029058253.1	WP_029058253.1	5582
22.9456	22.7421	22.1055	22.3604	22.9632	23.1999						31	31	31	77.2	77.2	77.2	30.195	0	105.76	853630000	111	0.274657	0.672272	-0.243425	-0.534221	WP_029058260.1	WP_029058260.1	5586
22.1464	22.2371	24.0207	20.7345	21.826	22.063						27	27	27	75.1	75.1	75.1	47.998	0	101.02	411040000	57	0.792053	0.223923	1.26023	1.50988	WP_029058263.1	WP_029058263.1	5588
22.0952	21.5661	23.0248	21.8285	22.1243	22.0454						24	24	24	63.9	63.9	63.9	53.585	0	68.204	509080000	84	0.20318	0.733304	0.229275	0.428206	WP_029058264.1	WP_029058264.1	5589
20.8807	19.3742	21.3948	20.3053	21.1162	20.8225						22	22	21	51.7	51.7	51.7	45.36	0	69.645	215550000	59	0.110123	0.84127	-0.198136	-0.263836	WP_029058266.1	WP_029058266.1	5591
22.92	23.2775	24.119	22.477	22.731	22.6225						32	32	32	61.2	61.2	61.2	53.168	0	75.205	712340000	103	1.07324	0.162095	0.828699	1.79007	WP_029058267.1	WP_029058267.1	5592
22.8409	22.8199	23.3076	21.2466	21.6879	21.7349						16	16	16	52.6	52.6	52.6	35.936	0	77.985	281470000	71	2.52404	0.07448	1.433	4.44295	WP_029058273.1	WP_029058273.1	5595
24.8959	24.4796	23.3733	24.3138	24.3537	24.5203						20	20	20	65.4	65.4	65.4	38.801	0	149.69	2288200000	129	0.115924	0.841623	-0.146301	-0.261857	WP_029058274.1	WP_029058274.1	5596
20.8395	19.786	20.0763	22.0117	19.8366	18.6209						30	24	24	41.6	37.3	37.3	74.137	0	133.19	108980000	44	0.0249422	0.956717	0.0775134	0.0679707	WP_029058275.1	WP_029058275.1	5597
21.9162	19.8937	21.5981	19.5548	21.3098	21.6657						10	10	10	47.9	47.9	47.9	33.785	0	51.952	197290000	42	0.117574	0.82626	0.292538	0.290938	WP_029058278.1	WP_029058278.1	5600
23.7324	23.4449	24.4405	21.569	22.4451	22.4488						38	38	38	55.7	55.7	55.7	64.5	0	145.91	518600000	117	1.83857	0.0722105	1.71831	3.32925	WP_029058285.1	WP_029058285.1	5606
24.4694	24.3136	24.6453	24.383	24.4899	24.5834						33	33	33	82.4	82.4	82.4	39.015	0	134.97	2270800000	163	0.0280094	0.975306	-0.00933584	-0.0440489	WP_029058293.1	WP_029058293.1	5613
22.8817	22.8516	23.5187	22.3127	22.1302	22.2099						17	17	17	61.7	61.7	61.7	20.337	0	21.618	432360000	38	1.74511	0.106013	0.8664	2.6754	WP_029058295.1	WP_029058295.1	5615
21.8488	21.6462	21.7656	21.2478	21.3978	21.9209						6	6	6	51.5	51.5	51.5	17.519	0	50.679	338000000	49	0.472273	0.550553	0.231375	0.740829	WP_029058296.1	WP_029058296.1	5616
18.3014	19.5056	18.7867	19.1839	20.8185	20.3347						18	18	18	58.7	58.7	58.7	39.79	0	15.416	158480000	29	0.97818	0.162	-1.24782	-1.78817	WP_029058298.1	WP_029058298.1	5618
22.628	21.9219	22.985	21.294	22.2139	22.2463						32	22	21	71.5	44.9	39.8	45.969	0	164.74	453210000	83	0.601893	0.362298	0.593553	1.09591	WP_029058299.1	WP_029058299.1	5619
21.5951	21.9452	18.8352	19.8431	18.8483	21.4232						26	21	21	58.6	54.3	54.3	59.497	0	57.702	124990000	32	0.240199	0.659284	0.75364	0.563809	WP_029058300.1	WP_029058300.1	5620
19.6505	19.5799	18.7858	20.4796	19.7278	19.6904						9	9	9	40.2	40.2	40.2	26.56	0	24.547	65047000	16	0.76329	0.275595	-0.627169	-1.31191	WP_029058301.1	WP_029058301.1	5621
20.2369	20.8516	20.9256	19.5694	20.7516	20.7176						8	8	8	57.1	57.1	57.1	18.625	0	12.585	155900000	25	0.29583	0.642758	0.32518	0.595948	WP_029058302.1	WP_029058302.1	5622
19.0894	19.3704	18.2065	20.2401	20.6082	20.1735						12	12	12	52.2	52.2	52.2	36.378	0	17.422	122850000	16	1.74238	0.0854035	-1.45181	-3.05129	WP_029058311.1	WP_029058311.1	5628
21.0726	23.0359	23.8555	19.2645	20.6227	22.1974						11	11	11	44.2	44.2	44.2	33.42	0.0016112	2.7437	230350000	21	0.762034	0.219164	1.95983	1.52737	WP_029058314.1	WP_029058314.1	5630
24.4553	24.2442	24.0893	23.6212	24.1752	24.2909						23	23	23	73.9	73.9	73.9	35.413	0	168.95	1938700000	151	0.430571	0.572906	0.233839	0.70372	WP_029058315.1	WP_029058315.1	5631
19.3734	19.6122	18.95	19.5629	20.7819	20.76						19	19	19	48.5	48.5	48.5	55.159	0	8.9321	120560000	22	1.11173	0.134836	-1.05638	-1.93179	WP_029058317.1	WP_029058317.1	5632
20.7919	20.7056	20.871	19.5332	20.552	20.982						16	16	16	63.2	63.2	63.2	45.245	0	36.399	168770000	31	0.429052	0.507254	0.433807	0.815059	WP_029058322.1	WP_029058322.1	5637
21.8412	21.1417	19.9577	20.7415	21.8055	22.2416						16	16	16	86.1	86.1	86.1	22.957	0	101.18	378070000	61	0.363409	0.540882	-0.616013	-0.762796	WP_029058326.1	WP_029058326.1	5640
20.5001	18.8324	20.5406	20.2825	20.1023	20.2745						8	8	8	28.6	28.6	28.6	37.055	0	15.013	122230000	20	0.175655	0.757916	-0.262058	-0.393586	WP_029058329.1	WP_029058329.1	5643
22.399	21.5589	22.481	22.2371	23.1962	23.1187						12	12	12	72.2	72.2	72.2	23.329	0	89.4	836770000	66	0.760628	0.265977	-0.704364	-1.33928	WP_029058330.1	WP_029058330.1	5644
18.9351	19.203	20.7426	20.4659	21.4598	21.2933						17	17	17	63.9	63.9	63.9	41.354	0	63.882	261230000	38	1.05915	0.13123	-1.44608	-1.94998	WP_029058331.1	WP_029058331.1	5645
21.838	19.0364	18.2256	19.5854	21.8087	22.0415						15	15	15	37.2	37.2	37.2	50.152	0	100.82	332510000	40	0.464383	0.404855	-1.44519	-0.999791	WP_029058332.1	WP_029058332.1	5646
20.9786	20.8582	21.1909	19.9249	20.5426	20.7941						14	14	14	72.1	72.1	72.1	27.274	0	44.445	165660000	54	1.00077	0.210582	0.588696	1.56593	WP_029058337.1	WP_029058337.1	5648
21.4956	21.1105	21.1624	20.9518	21.0805	20.9363						11	11	11	51.1	51.1	51.1	24.308	0	33.29	246140000	56	0.968017	0.335293	0.266595	1.16417	WP_029058339.1	WP_029058339.1	5649
20.6455	20.6249	20.4672	19.7763	20.187	20.446						20	20	20	49.2	49.2	49.2	54.565	0	45.892	115710000	48	1.02436	0.237896	0.442797	1.46166	WP_029058340.1	WP_029058340.1	5650
19.1085	23.4596	21.2256	20.2275	18.8757	19.2482						5	5	5	14.5	14.5	14.5	37.328	0.0096008	1.7709	45628000	11	0.617798	0.288439	1.81414	1.27819	WP_029058341.1	WP_029058341.1	5651
23.6101	23.4742	23.7035	23.546	23.9214	24.0117						31	31	31	75.2	75.2	75.2	49.165	0	142.22	1523700000	122	0.663858	0.460697	-0.230483	-0.895601	WP_029058344.1	WP_029058344.1	5652
20.7476	20.4553	20.5096	18.7952	18.8825	19.449						6	6	6	64.7	64.7	64.7	12.86	0	16.048	61137000	11	2.61963	0.0693333	1.5286	4.72162	WP_029058345.1	WP_029058345.1	5653
22.7072	22.0996	22.842	22.7292	22.1192	22.3515						17	17	17	61.1	61.1	61.1	34.107	0	109.79	458380000	56	0.199004	0.762713	0.149608	0.384244	WP_029058352.1	WP_029058352.1	5658
19.3298	20.0564	19.6578	18.9711	21.7977	21.5609						13	13	13	60.1	60.1	60.1	33.133	0	15.653	232640000	11	0.517233	0.377925	-1.09525	-1.06399	WP_029058355.1	WP_029058355.1	5661
22.3643	21.8938	19.4522	22.4324	22.4184	22.1418						13	13	13	76.6	76.6	76.6	31.207	0	35.616	555890000	36	0.531057	0.368393	-1.09409	-1.08595	WP_029058366.1	WP_029058366.1	5669
19.0224	19.4177	18.8433	19.3559	21.8981	23.0096						23	23	23	41.6	41.6	41.6	82.735	0	14.396	494240000	32	0.996998	0.130829	-2.32679	-1.94776	WP_029058367.1	WP_029058367.1	5670
22.9915	22.6514	23.5163	22.9795	23.1605	23.3135						21	21	21	37.8	37.8	37.8	67.247	0	44.903	970780000	57	0.134221	0.840465	-0.0981363	-0.265626	WP_029058370.1	WP_029058370.1	5671
24.1022	19.3716	23.558	19.6581	25.252	25.179						9	9	9	30.3	30.3	30.3	71.362	0.58605	-0.65593	3309900000	26	0.160781	0.747871	-1.0191	-0.410889	WP_029058376.1	WP_029058376.1	5677
24.2289	19.6438	25.9915	19.1317	17.8881	19.1371						7	7	7	18.1	18.1	18.1	48.428	0.62512	-0.78898	534970000	15	1.10928	0.113795	4.56908	2.24312	WP_029058382.1	WP_029058382.1	5680
18.4997	19.6925	20.2007	20.1598	20.2353	19.8583						26	26	26	54.2	54.2	54.2	68.211	0	16.223	92724000	29	0.527805	0.403838	-0.620136	-1.00491	WP_029058383.1	WP_029058383.1	5681
20.4306	20.8611	18.9806	20.359	21.4527	20.6905						16	16	16	45.3	45.3	45.3	28.647	0	253.23	211470000	33	0.49544	0.411529	-0.743258	-0.985061	WP_029058389.1	WP_029058389.1	5686
23.1147	22.4301	21.6161	22.9263	23.1625	23.2035						24	24	24	58.2	58.2	58.2	36.593	0	88.394	900910000	84	0.737579	0.275752	-0.710482	-1.31163	WP_029058403.1	WP_029058403.1	5694
25.422	25.0126	23.8987	24.767	24.7853	25.0474						22	22	22	96.1	96.1	96.1	27.384	0	195.89	2921600000	167	0.0667214	0.904618	-0.0887871	-0.157408	WP_029058405.1	WP_029058405.1	5695
24.8509	24.4344	23.6025	24.3055	24.4357	24.716						14	14	14	88.9	88.9	88.9	21.759	0	134.06	2544500000	99	0.187707	0.759158	-0.189786	-0.390152	WP_029058406.1	WP_029058406.1	5696
26.9946	26.5144	25.782	26.2998	26.747	26.7796						33	33	33	67.8	67.8	67.8	34.201	0	321.56	10586000000	368	0.175798	0.776539	-0.178466	-0.367928	WP_029058407.1	WP_029058407.1	5697
25.3865	24.7348	24.2616	24.4235	24.7065	24.9725						20	20	20	71.9	71.9	71.9	24.958	0	154.28	2782800000	97	0.0918825	0.878501	0.093462	0.202035	WP_029058408.1	WP_029058408.1	5698
23.4068	23.1699	22.181	22.9326	22.8405	22.8031						15	15	15	72.2	72.2	72.2	27.09	0	78.994	641870000	65	0.0553423	0.915847	0.0605227	0.126784	WP_029058409.1	WP_029058409.1	5699
20.4836	20.0725	19.8762	20.1627	20.2313	20.4447						13	13	13	42.1	42.1	42.1	44.498	0	19.004	103910000	31	0.274387	0.713274	-0.135442	-0.454412	WP_029058415.1	WP_029058415.1	5703
21.6271	21.7551	21.6491	20.2417	20.2687	20.3031				+	2AEP P_Pi	9	9	9	48	48	48	28.45	0	22.858	128480000	28	5.26963	0.012	1.40594	9.80967	WP_029058418.1	WP_029058418.1	5705
20.4513	20.3621	20.815	19.1434	18.3077	19.2729						10	10	10	47.2	47.2	47.2	25.301	0	12.017	17478000	22	2.09888	0.0685143	1.63478	3.77825	WP_029058419.1	WP_029058419.1	5706
27.2265	26.9106	27.0706	26.0973	26.1757	26.3836						29	29	29	69.7	69.7	69.7	40.842	0	323.31	8317000000	312	2.61331	0.0695072	0.850353	3.78012	WP_029058422.1	WP_029058422.1	5709
24.8723	24.4396	24.1493	23.7435	24.0773	24.4049						11	11	11	100	100	100	7.6585	0	83.097	2140100000	97	0.656601	0.374204	0.411797	1.07275	WP_029058427.1	WP_029058427.1	5714
26.0527	25.7339	27.1249	27.7575	28.511	28.2715						26	26	26	55.2	55.2	55.2	41.931	0	323.31	30550000000	257	1.77164	0.0763232	-1.87615	-3.25818	WP_029058438.1	WP_029058438.1	5723
21.8588	22.0412	23.7272	19.7518	21.5234	21.8111						18	18	18	54.7	54.7	54.7	39.379	0	57.215	248200000	46	0.797897	0.211665	1.51367	1.55006	WP_029058439.1	WP_029058439.1	5724
23.6094	23.6656	24.2816	23.1131	23.1373	23.1517						29	29	28	72.2	72.2	72.2	40.766	0	252.47	950060000	127	1.53634	0.113089	0.718185	2.27547	WP_029058445.1	WP_029058445.1	5727
18.9438	19.631	18.9496	21.5929	21.1946	21.3872				+	2AEP P_Pi	7	7	7	77.2	77.2	77.2	11.272	0	32.486	217220000	20	3.01299	0.0381538	-2.2168	-6.2365	WP_029058448.1	WP_029058448.1	5728
17.7967	19.6693	19.6382	23.9885	24.3596	24.0808				+	2AEP P_Pi	39	39	39	77.7	77.7	77.7	60.977	0	190.24	1859600000	124	2.90284	0.0274286	-5.10821	-7.00658	WP_029058449.1	WP_029058449.1	5729
19.1473	19.9634	18.324	20.966	21.7599	21.8262						13	13	13	55.2	55.2	55.2	26.713	0	18.558	293190000	20	1.90803	0.0710933	-2.37248	-3.66104	WP_029058450.1	WP_029058450.1	5730
24.2655	23.5792	24.3468	25.5347	26.1457	25.8495						27	27	27	97.8	97.8	97.8	29.691	0	135.79	5657000000	149	2.38927	0.0716154	-1.77947	-4.44159	WP_029058452.1	WP_029058452.1	5731
22.9139	22.5604	23.0211	23.9806	24.5267	24.4983						30	30	30	79.6	79.6	79.6	35.351	0	304.02	1927800000	109	2.57972	0.07075	-1.50339	-4.61809	WP_029058453.1	WP_029058453.1	5732
22.0646	19.673	19.3091	21.5894	18.4435	21.6075						17	17	17	47.5	47.5	47.5	51.192	0	40.547	193950000	27	0.0498985	0.911761	-0.197865	-0.13541	WP_029058456.1	WP_029058456.1	5733
19.5341	20.0861	19.4162	19.5425	19.5568	18.9517						9	9	9	35.2	35.2	35.2	15.528	0	10.719	11175000	15	0.499866	0.486236	0.328462	0.848641	WP_029058459.1	WP_029058459.1	5736
22.46	19.5992	21.9969	22.1237	23.3582	23.3653						10	10	10	49.3	49.3	49.3	22.579	0	48.834	864610000	70	0.750117	0.232296	-1.59706	-1.48162	WP_029058461.1	WP_029058461.1	5738
24.4661	24.4301	24.4553	24.5195	24.4677	24.6917						20	20	20	76.2	76.2	76.2	25.05	0	206.08	2492000000	153	0.729306	0.608599	-0.109128	-0.647529	WP_029058462.1	WP_029058462.1	5739
21.2372	21.2618	21.4921	20.3146	20.9509	21.0547						19	19	19	46.1	46.1	46.1	43.012	0	42.37	245030000	40	1.06772	0.200369	0.556975	1.6136	WP_029058467.1	WP_029058467.1	5742
24.9166	24.4481	25.1247	24.1457	24.465	24.5905						19	19	19	63.9	63.9	63.9	40.683	0	210.45	2328500000	106	0.829748	0.292182	0.429413	1.26323	WP_029058468.1	WP_029058468.1	5743
20.1321	19.589	18.6481	19.2089	20.5358	21.0949						12	12	12	32.8	32.8	32.8	50.981	0	9.502	142640000	23	0.509744	0.396144	-0.823475	-1.01965	WP_029058469.1	WP_029058469.1	5744
21.2607	20.7521	21.3349	21.4096	21.5922	21.5668						24	24	24	67.1	67.1	67.1	50.728	0	73.862	366610000	58	0.994842	0.253458	-0.407003	-1.39449	WP_029058472.1	WP_029058472.1	5745
20.1806	19.3407	18.3798	18.9986	19.9234	19.7979						14	14	14	45.2	45.2	45.2	46.045	0	42.31	102070000	23	0.173652	0.757837	-0.272969	-0.392537	WP_029058473.1	WP_029058473.1	5746
31.1118	30.6078	31.0686	31.4935	32.1815	32.067						54	54	54	86.9	86.9	86.9	38.093	0	323.31	392220000000	1900	1.67622	0.107417	-0.984591	-2.68244	WP_029058475.1	WP_029058475.1	5747
21.9405	21.7298	21.8969	22.0927	22.1639	22.2577						25	25	25	77.5	77.5	77.5	33.49	0	131.79	551790000	99	1.7722	0.16836	-0.315696	-1.75352	WP_029058476.1	WP_029058476.1	5748
21.3837	21.2318	21.6625	21.8817	22.3804	22.0538						42	42	42	34.3	34.3	34.3	150.18	0	119.03	515890000	119	1.61059	0.111339	-0.679249	-2.31726	WP_029058477.1	WP_029058477.1	5749
21.578	20.715	19.2195	24.7536	25.3245	25.2351				+	2AEP P_Pi	29	29	29	94.2	94.2	94.2	18.781	0	323.31	3887900000	182	2.5308	0.0455294	-4.60024	-5.66959	WP_029058479.1	WP_029058479.1	5750
19.1655	20.025	19.2975	19.6297	21.5093	21.6604						26	26	26	38.7	38.7	38.7	103	0	54.85	259820000	42	0.953134	0.162597	-1.43717	-1.78369	WP_029058485.1	WP_029058485.1	5753
20.0363	19.34	20.4358	18.954	20.5829	21.1715						28	28	28	67.9	67.9	67.9	44.008	0	58.323	189080000	42	0.151351	0.781752	-0.298759	-0.357171	WP_029058486.1	WP_029058486.1	5754
20.3828	20.076	20.3927	18.8197	20.277	20.3006						16	16	16	47.2	47.2	47.2	39.881	0	26.67	127320000	34	0.411424	0.514243	0.484741	0.80701	WP_029058487.1	WP_029058487.1	5755
22.3998	21.4051	23.038	22.0004	22.9136	22.9151						45	45	45	72.4	72.4	72.4	76.567	0	87.352	708430000	102	0.228043	0.691233	-0.328726	-0.494798	WP_029058488.1	WP_029058488.1	5756
22.6703	19.3058	22.5967	23.2637	23.937	23.2068						46	46	46	66.7	66.7	66.7	96.067	0	145.84	1390300000	95	0.79193	0.209265	-1.94489	-1.57616	WP_029058497.1	WP_029058497.1	5761
25.5613	25.6896	25.3805	25.1973	25.402	25.4163						25	25	25	93.1	93.1	93.1	29.145	0	172.48	4267900000	222	0.833355	0.423138	0.205225	0.958043	WP_029058498.1	WP_029058498.1	5762
21.6783	21.8601	22.0697	22.6331	22.4918	22.7296						21	21	21	64.1	64.1	64.1	40.751	0	80.185	559210000	75	2.31606	0.0758812	-0.748779	-3.22059	WP_029058500.1	WP_029058500.1	5764
20.5203	19.5074	18.71	20.1367	21.0867	20.3968						23	23	23	49.5	49.5	49.5	51.49	0	9.0945	151870000	40	0.739977	0.258841	-0.960836	-1.38135	WP_029058504.1	WP_029058504.1	5766
21.2047	21.3126	22.0163	21.682	23.0634	22.5773						31	31	31	61.1	61.1	61.1	50.407	0	145.24	712980000	69	0.907822	0.202994	-0.929677	-1.60858	WP_029058506.1	WP_029058506.1	5768
24.0305	23.4725	24.1338	24.2708	24.2757	24.3492						41	41	41	86	86	86	56.068	0	224.14	2145500000	157	0.948838	0.260515	-0.419648	-1.36714	WP_029058511.1	WP_029058511.1	5772
21.94	21.8141	19.0494	21.4002	21.8771	21.9619						15	15	15	60.3	60.3	60.3	32.114	0	36.136	372230000	51	0.35162	0.540148	-0.811919	-0.766454	WP_029058512.1	WP_029058512.1	5773
25.2692	24.5003	24.6476	24.9586	25.2645	25.1577						14	14	14	58.2	58.2	58.2	40.869	0	108.32	3738700000	103	0.566168	0.446287	-0.321239	-0.912404	WP_029058515.1	WP_029058515.1	5775
19.8536	19.7385	19.7602	19.2231	19.9663	19.6458						15	15	15	33.6	33.6	33.6	74.568	0	39.923	88601000	33	0.324587	0.670651	0.172361	0.541823	WP_029058520.1	WP_029058520.1	5779
20.5817	19.7859	21.0457	20.5798	20.0701	20.2307						18	18	18	31.1	31.1	31.1	58.022	0	20.045	145150000	37	0.168657	0.781209	0.177557	0.35694	WP_029058526.1	WP_029058526.1	5785
21.0306	19.8163	21.814	21.2192	20.5882	21.2256						14	14	14	71	71	71	27.996	0	48.061	218720000	30	0.0701786	0.893554	-0.124058	-0.172688	WP_029058527.1	WP_029058527.1	5786
20.8575	20.6985	20.9682	18.4751	20.6563	20.9616						10	10	10	39	39	39	36.473	0	58.331	115860000	26	0.442209	0.445726	0.810401	0.913809	WP_029058540.1	WP_029058540.1	5796
22.5282	22.1015	21.943	20.7939	21.6344	21.4952						10	10	10	100	100	100	7.3831	0	60.257	300060000	47	1.31954	0.117843	0.883059	2.13642	WP_029058547.1	WP_029058547.1	5801
18.1038	20.0753	18.8299	19.7815	20.1406	19.9299						6	6	6	22.5	22.5	22.5	20.356	0	6.2249	88192000	9	0.743373	0.258259	-0.947671	-1.38344	WP_029058550.1	WP_029058550.1	5804
23.8077	23.5633	24.0775	23.6047	23.9164	23.7955						16	16	16	92	92	92	24.105	0	172.97	1286900000	78	0.0898861	0.902262	0.043958	0.160408	WP_029058551.1	WP_029058551.1	5805
23.5031	23.459	23.4044	23.546	23.674	23.6262						22	22	22	61.9	61.9	61.9	45.232	0	119.5	1131400000	125	1.56527	0.367778	-0.159897	-1.0878	WP_029058552.1	WP_029058552.1	5806
20.7981	20.5316	21.0918	21.6058	21.9908	21.4436						23	23	23	41.7	41.7	41.7	52.81	0	42.166	361330000	51	1.72233	0.106075	-0.872902	-2.65195	WP_029058553.1	WP_029058553.1	5807
20.2442	19.4937	20.3022	19.5947	19.6168	18.7878						14	14	14	93.2	93.2	93.2	14.388	0.00055006	3.2096	241090000	26	0.837058	0.246368	0.680271	1.426	WP_029058559.1	WP_029058559.1	5810
20.769	20.1812	20.2351	20.5706	20.6821	20.1825						24	24	24	54.2	54.2	54.2	53.404	0	14.616	194140000	42	0.126604	0.851491	-0.0832882	-0.244195	WP_029058561.1	WP_029058561.1	5811
18.5342	21.5646	18.379	18.6402	20.3811	19.9395						12	12	12	43.2	43.2	43.2	41.858	0	17.274	155750000	24	0.0474937	0.915733	-0.161022	-0.127678	WP_029058562.1	WP_029058562.1	5812
18.6786	19.2727	19.1163	21.3129	21.5109	21.5442				+	2AEP P_Pi	12	12	12	66.5	66.5	66.5	26.763	0	7.4721	287530000	26	3.6523	0.0252308	-2.43346	-8.3368	WP_029058566.1	WP_029058566.1	5816
19.1136	19.3683	19.6494	19.8311	19.7204	19.9734						13	13	13	66.5	66.5	66.5	24.824	0	43.481	84547000	22	1.27276	0.178235	-0.464506	-1.71274	WP_029058569.1	WP_029058569.1	5818
24.7866	24.6641	25.3741	23.8879	23.7818	23.6894						21	21	21	56.5	56.5	56.5	36.211	0	111.1	1454800000	125	2.1561	0.0686588	1.15524	3.53824	WP_029058570.1	WP_029058570.1	5819
21.766	21.2901	21.7372	20.0896	17.6963	21.015						11	11	11	46.4	46.4	46.4	30.855	0	24.04	192350000	25	0.933172	0.154056	1.9975	1.81475	WP_029058573.1	WP_029058573.1	5821
21.3252	21.2903	21.1331	21.3845	21.6634	21.5107						14	14	14	42.9	42.9	42.9	34.227	0	25.494	301240000	51	1.26733	0.263122	-0.270001	-1.35027	WP_029058575.1	WP_029058575.1	5823
22.111	22.0755	22.443	22.6724	22.872	22.6843						34	34	34	66.5	66.5	66.5	56.744	0	114.49	730320000	81	1.78768	0.114486	-0.533092	-2.28104	WP_029058577.1	WP_029058577.1	5824
21.2283	21.3091	20.9854	21.3771	21.3786	21.5413						15	15	15	54.6	54.6	54.6	24.802	0	27.883	383150000	45	1.08829	0.309994	-0.258091	-1.2203	WP_029058581.1	WP_029058581.1	5827
24.399	24.4302	24.6639	23.286	23.2274	23.7686						39	39	29	71.2	71.2	49.6	56.885	0	191.73	1029700000	150	2.30481	0.0730411	1.07035	3.68124	WP_029058582.1	WP_029058582.1	5828
24.5457	24.0683	24.188	24.5803	24.4516	24.2204						68	68	68	78.7	78.7	78.7	94.973	0	213.03	1782000000	150	0.350247	0.670745	-0.150062	-0.539984	WP_029058585.1	WP_029058585.1	5830
20.7926	19.6381	20.3233	19.8175	20.7007	20.3779						21	21	21	74.8	74.8	74.8	38.996	0	66.279	231910000	40	0.0380253	0.937759	-0.0474065	-0.0906417	WP_029058588.1	WP_029058588.1	5832
21.3194	19.0902	21.7027	21.6211	21.853	21.3415						39	39	39	56.3	56.3	56.3	83.002	0	59.795	265280000	60	0.471643	0.418238	-0.901081	-0.971183	WP_029058589.1	WP_029058589.1	5833
22.4367	22.0631	22.1392	22.4218	22.3775	22.4352						27	27	27	73.1	73.1	73.1	44.343	0	86.611	520380000	68	0.795149	0.439451	-0.1985	-0.921941	WP_029058590.1	WP_029058590.1	5834
20.1587	20.121	18.5487	20.4373	20.1856	20.1073						12	12	12	51.2	51.2	51.2	27.967	0	28.974	117740000	30	0.515173	0.409009	-0.633904	-0.990851	WP_029058591.1	WP_029058591.1	5835
19.8587	20.6862	19.6607	19.174	19.2284	18.1376						4	4	4	38.1	38.1	38.1	13.054	0.00055371	3.4254	28380000	12	1.21153	0.116919	1.22187	2.12899	WP_029058593.1	WP_029058593.1	5837
22.089	21.7735	22.1733	20.7134	22.4661	22.6178						22	22	22	57.8	57.8	57.8	42.675	0	40.734	588700000	88	0.0435336	0.926454	0.0795078	0.109957	WP_029058603.1	WP_029058603.1	5845
25.0806	24.4332	25.254	25.2834	25.58	25.662						86	86	86	80	80	80	104	0	323.31	5292300000	313	0.999466	0.211163	-0.585892	-1.56251	WP_029058604.1	WP_029058604.1	5846
22.6022	19.8867	17.4395	18.7999	20.2783	21.0103						8	8	8	38.7	38.7	38.7	27.816	0	29.762	178210000	14	0.0108191	0.985538	-0.0533727	-0.0309125	WP_029058609.1	WP_029058609.1	5849
20.9294	19.7977	19.2504	20.6546	21.4063	20.8933						13	13	13	48.9	48.9	48.9	19.918	0	8.0334	227010000	30	0.850747	0.210859	-0.992284	-1.546	WP_029058610.1	WP_029058610.1	5850
21.171	20.6041	21.2934	21.6115	22.0715	21.9409						20	20	20	51.4	51.4	51.4	38.43	0	131	406640000	46	1.55292	0.106	-0.851796	-2.41563	WP_029058611.1	WP_029058611.1	5851
19.0804	18.9546	20.0172	19.9815	20.6606	18.2567						5	5	5	22.2	22.2	22.2	27.844	0	20.619	112600000	14	0.131339	0.810236	-0.282191	-0.317023	WP_029058616.1	WP_029058616.1	5854
22.1712	21.6964	23.7165	19.3832	18.6303	21.1935						17	17	17	68	68	68	37.004	0	50.797	170420000	29	1.33978	0.110012	2.79237	2.59781	WP_029058621.1	WP_029058621.1	5859
23.249	22.8238	24.4182	24.5916	24.8298	24.7126						46	46	46	79.7	79.7	79.7	61.024	0	268.54	2787600000	201	1.1854	0.11694	-1.21432	-2.08794	WP_029058626.1	WP_029058626.1	5862
23.1646	23.1702	23.4394	23.9538	23.7579	23.7017						25	25	25	70.6	70.6	70.6	41.848	0	123.58	1322500000	130	2.0013	0.105949	-0.546356	-2.49974	WP_029058629.1	WP_029058629.1	5863
18.9768	20.7523	18.8854	19.822	17.9523	18.1947						5	5	5	72.3	72.3	72.3	9.2031	0.002103	2.3743	17089000	8	0.449142	0.436067	0.881863	0.93331	WP_029058631.1	WP_029058631.1	5864
19.2692	18.4542	21.4581	21.8264	22.0047	21.1846						32	32	32	63	63	63	57.724	0	47.607	344240000	61	0.979147	0.140432	-1.94473	-1.88658	WP_029058635.1	WP_029058635.1	5866
21.5226	18.779	22.1885	19.6885	21.5941	21.5989						33	33	33	56	56	56	99.08	0	129.4	190360000	61	0.0361576	0.932188	-0.130459	-0.0986889	WP_029058637.1	WP_029058637.1	5868
19.3136	20.4194	18.5308	20.5958	19.259	19.1041						9	9	9	65.6	65.6	65.6	17.997	0	20.754	43152000	20	0.116355	0.833046	-0.231735	-0.281189	WP_029058638.1	WP_029058638.1	5869
19.1471	19.0667	19.2363	18.2032	19.5652	19.3433						13	13	13	44.2	44.2	44.2	36.555	0	11.461	95231000	20	0.0949309	0.870398	0.112818	0.215006	WP_029058641.1	WP_029058641.1	5871
21.8358	21.8528	21.9986	22.5981	23.0469	23.0836						19	19	19	55.2	55.2	55.2	36.534	0	130.97	884920000	93	2.4548	0.0712727	-1.01384	-3.8347	WP_029058645.1	WP_029058645.1	5875
23.6751	23.8624	23.1501	23.5063	23.2459	23.3731						20	20	20	69.5	69.5	69.5	29.11	0	116.6	1080200000	92	0.343309	0.653777	0.187436	0.574867	WP_029058649.1	WP_029058649.1	5879
18.4713	19.5534	19.782	18.6454	20.4934	20.4324						13	13	13	34	34	34	37.435	0	19.299	142790000	25	0.332789	0.571182	-0.588141	-0.709893	WP_029058651.1	WP_029058651.1	5880
23.2237	23.2239	23.3001	23.8714	23.8357	23.7496						13	13	13	45.8	45.8	45.8	27.26	0	125.91	1421800000	68	3.68037	0.0752667	-0.569677	-3.95093	WP_029058652.1	WP_029058652.1	5881
22.5875	22.2751	22.6957	22.6629	22.5647	22.5638						24	24	24	66.2	66.2	66.2	34.265	0	83.692	637450000	83	0.234361	0.791306	-0.0777238	-0.337489	WP_029058659.1	WP_029058659.1	5887
24.7293	24.3894	23.9418	23.8372	23.495	23.9459						22	22	22	97	97	97	10.914	0	127.38	1311600000	88	1.05159	0.199712	0.594125	1.62575	WP_029058661.1	WP_029058661.1	5888
20.8995	20.0377	19.1188	20.8576	20.6753	20.6394						10	10	10	50	50	50	30.886	0	31.255	142490000	24	0.610324	0.341337	-0.705466	-1.14055	WP_029058663.1	WP_029058663.1	5889
19.894	19.3044	19.6834	18.8528	20.3795	20.5792						12	12	12	53.3	53.3	53.3	21.716	0	18.819	139400000	31	0.209972	0.710951	-0.309929	-0.461284	WP_029058667.1	WP_029058667.1	5891
24.6803	24.7791	25.4047	25.1341	25.3366	25.1199						92	92	92	75	75	75	126.23	0	323.31	4306700000	367	0.437348	0.564806	-0.242169	-0.717822	WP_029058671.1	WP_029058671.1	5894
19.403	20.0256	17.9346	20.4617	19.7894	20.2278						16	16	16	50.9	50.9	50.9	40.187	0	23.688	103610000	30	0.731507	0.258277	-1.03855	-1.38395	WP_029058691.1	WP_029058691.1	5906
24.5729	24.5587	23.8892	23.6377	24.0171	23.9136						20	20	20	75.6	75.6	75.6	13.468	0	49.668	1617600000	116	0.894384	0.260326	0.484171	1.3739	WP_029058692.1	WP_029058692.1	5907
23.0447	23.1867	22.1282	22.2568	22.4841	22.3546						6	6	6	56.9	56.9	56.9	7.2455	0	8.4913	594190000	26	0.551695	0.422948	0.421392	0.961684	WP_029058693.1	WP_029058693.1	5908
22.5232	21.414	22.4666	21.3872	21.9043	21.3699						19	19	19	57.7	57.7	57.7	37.286	0	24.888	384880000	54	0.655371	0.337504	0.580817	1.1592	WP_029058696.1	WP_029058696.1	5909
22.4149	22.0822	22.4011	21.9191	22.964	22.7095						33	33	33	58.1	58.1	58.1	66.832	0	92.913	805210000	75	0.279838	0.671975	-0.231489	-0.534847	WP_029058703.1	WP_029058703.1	5914
22.2239	20.6297	22.9002	22.2704	22.9638	22.1779						26	26	26	55.4	55.4	55.4	54.843	0	72.257	690100000	62	0.315242	0.587223	-0.552785	-0.676365	WP_029058707.1	WP_029058707.1	5917
20.2968	18.9566	19.3139	19.9687	20.2644	20.171						10	10	10	48.6	48.6	48.6	31.326	0	18.633	115400000	14	0.678392	0.318202	-0.612286	-1.20037	WP_029058712.1	WP_029058712.1	5920
23.4817	23.3728	23.6722	23.6123	23.3158	23.5092						20	20	20	62.4	62.4	62.4	27.543	0	80.667	1316900000	113	0.0856959	0.912088	0.0298042	0.133453	WP_029058715.1	WP_029058715.1	5922
20.3762	20.725	20.2078	20.3207	18.4162	18.8722						6	6	6	33.3	33.3	33.3	16.649	0	16.052	31591000	19	0.972775	0.162785	1.23332	1.77711	WP_029058716.1	WP_029058716.1	5923
23.2397	23.3508	24.1752	19.7107	19.5127	19.6761				+	2AEP P_Pi	36	36	36	61.1	61.1	61.1	84.427	0	58.394	259590000	79	3.71126	0.0135	3.95541	9.85661	WP_029058717.1	WP_029058717.1	5924
23.1101	22.8504	23.7644	20.0477	19.9532	19.8				+	2AEP P_Pi	18	18	18	71.7	71.7	71.7	27.208	0	71.403	180970000	75	3.52396	0.0298182	3.30798	8.6751	WP_029058718.1	WP_029058718.1	5925
27.2761	27.3029	27.7116	27.4164	27.5091	27.472						86	86	86	98	98	98	76.124	0	323.31	18999000000	811	0.0882231	0.907265	-0.0356178	-0.14629	WP_029058723.1	WP_029058723.1	5928
26.4668	26.3143	25.8869	25.4391	25.4363	25.6109						34	34	34	95.5	95.5	95.5	17.803	0	289.04	4880900000	245	1.78373	0.107333	0.727203	2.57061	WP_029058724.1	WP_029058724.1	5929
26.7488	26.5202	26.8757	27.1567	27.378	27.3285						154	154	154	81.1	81.1	81.1	154.98	0	323.31	16820000000	1023	2.00795	0.107363	-0.572847	-2.56002	WP_029058726.1	WP_029058726.1	5931
27.1323	26.9311	27.2572	27.4992	27.6766	27.6562						156	156	156	94.8	94.8	94.8	154.06	0	323.31	20017000000	1001	1.98825	0.108091	-0.503805	-2.39583	WP_029058727.1	WP_029058727.1	5932
24.8181	24.729	24.2116	23.8507	23.9939	24.4546						13	13	13	86.4	86.4	86.4	12.926	0	260.45	1816100000	115	0.861598	0.266228	0.486493	1.34182	WP_029058728.1	WP_029058728.1	5933
25.7122	26.0461	24.9667	24.5295	24.7616	24.8172						15	15	15	88.4	88.4	88.4	18.113	0	105.82	3017900000	151	1.23748	0.120748	0.872232	2.02369	WP_029058729.1	WP_029058729.1	5934
25.7535	25.5255	25.3691	25.3167	25.4588	25.4065						33	33	33	92.2	92.2	92.2	24.179	0	210.48	3988800000	196	0.58192	0.570278	0.155406	0.709376	WP_029058730.1	WP_029058730.1	5935
24.9817	24.5976	24.0105	23.9907	24.0662	24.0086						12	12	12	80.4	80.4	80.4	15.277	0	137.28	1726500000	103	0.831668	0.268833	0.508112	1.32561	WP_029058731.1	WP_029058731.1	5936
24.76	24.3746	24.2107	24.1548	24.1348	24.1726						24	24	24	93.2	93.2	93.2	19.96	0	157.06	1862000000	140	0.836797	0.350648	0.294331	1.11835	WP_029058732.1	WP_029058732.1	5937
20.3832	19.3097	18.9841	20.3409	20.6823	20.2285						3	3	3	38.5	38.5	38.5	7.3116	0	11.392	175010000	18	0.901336	0.210128	-0.858191	-1.57708	WP_029058733.1	WP_029058733.1	5938
21.8029	21.0655	20.3336	19.5716	22.5854	19.5463						10	10	10	44.7	44.7	44.7	21.273	0.5887	-0.66292	479090000	23	0.172808	0.740748	0.499577	0.418269	WP_029058739.1	WP_029058739.1	5942
19.7201	19.3247	19.2456	20.6489	20.0015	19.4639						4	4	4	21.6	21.6	21.6	17.168	0.00054496	3.0039	78030000	13	0.749172	0.284051	-0.607957	-1.28617	WP_029058741.1	WP_029058741.1	5944
19.7535	19.7949	20.0319	18.6285	19.5845	19.9488						12	12	12	58.6	58.6	58.6	31.313	0	48.694	63556000	30	0.514407	0.434396	0.472837	0.939794	WP_029058742.1	WP_029058742.1	5945
23.5966	22.9388	24.0348	23.88	24.3019	24.0725						53	53	53	78.9	78.9	78.9	73.673	0	209.69	1701600000	182	0.756711	0.290648	-0.561371	-1.27282	WP_029058747.1	WP_029058747.1	5948
19.6934	18.8657	17.9806	19.7451	20.4997	20.4371						15	15	15	37	37	37	54.596	0.0036307	2.1656	126480000	21	1.17927	0.115721	-1.38073	-2.12264	WP_029058748.1	WP_029058748.1	5949
21.6143	20.8558	21.2085	21.3945	21.9516	21.998						16	16	16	77.1	77.1	77.1	23.457	0	30.666	458660000	66	0.883915	0.248587	-0.555161	-1.41405	WP_029058751.1	WP_029058751.1	5951
20.4873	19.6443	19.9253	20.0893	20.0402	20.1348						8	8	8	62.9	62.9	62.9	16.585	0	7.4116	118680000	16	0.0994669	0.880871	-0.0691331	-0.197905	WP_029058752.1	WP_029058752.1	5952
22.7775	22.6017	22.8766	21.1913	21.5958	21.8006						20	20	20	94.4	94.4	94.4	15.489	0	58.437	349370000	59	2.47108	0.0725517	1.2227	4.12735	WP_029058753.1	WP_029058753.1	5953
20.9419	20.6744	20.4488	20.5271	18.969	21.0197						6	6	6	48	48	48	18.62	0	36.506	114670000	19	0.336112	0.573059	0.51644	0.703354	WP_029058757.1	WP_029058757.1	5957
21.3494	20.4985	21.51	21.1176	21.2832	21.3281						21	21	21	59.6	59.6	59.6	30.287	0	85.308	324970000	40	0.143201	0.823821	-0.123647	-0.294195	WP_029058761.1	WP_029058761.1	5960
21.6535	21.2527	21.6578	20.9379	21.1671	21.137						19	19	19	62.4	62.4	62.4	27.361	0	38.082	293490000	45	1.35233	0.170489	0.440695	1.74649	WP_029058764.1	WP_029058764.1	5962
20.0634	19.9209	19.4122	20.0508	20.0592	19.7577						16	16	16	42.7	42.7	42.7	42.696	0	28.978	103510000	30	0.286713	0.69433	-0.157048	-0.489074	WP_029058766.1	WP_029058766.1	5963
20.7382	19.0766	20.3854	18.3129	20.3769	19.5381						7	7	7	62.1	62.1	62.1	18.822	0	14.094	97589000	21	0.34788	0.550154	0.657459	0.743757	WP_029058768.1	WP_029058768.1	5965
20.9746	21.1043	20.9169	20.3481	21.1212	20.6089						12	12	12	66.8	66.8	66.8	25.654	0	9.3661	134190000	24	0.583624	0.443756	0.305838	0.91639	WP_029058770.1	WP_029058770.1	5966
23.0006	21.3873	22.5715	22.8938	23.2681	23.1291						12	12	12	57	57	57	30.305	0	66.026	903790000	53	0.71848	0.277635	-0.777238	-1.30704	WP_029058773.1	WP_029058773.1	5968
20.8127	19.3036	21.4985	20.7115	21.485	21.2948						19	19	19	70.4	70.4	70.4	32.734	0	74.915	294410000	51	0.381739	0.524482	-0.625488	-0.79295	WP_029058779.1	WP_029058779.1	5971
21.0887	18.9306	21.1222	18.9675	21.1588	21.0368						17	17	17	45	45	45	35.891	0	24.8	140540000	34	0.00231796	0.997783	-0.00720723	-0.00646123	WP_029058780.1	WP_029058780.1	5972
21.7031	21.0162	21.7887	21.9264	22.0679	22.056						18	18	18	66.2	66.2	66.2	34.815	0	145.79	453010000	64	0.9685	0.232761	-0.514073	-1.47454	WP_029058783.1	WP_029058783.1	5973
22.196	18.5882	21.6334	19.4219	18.652	21.5318						34	34	34	39.6	39.6	39.6	125.01	0.28025	0.06868	254340000	43	0.264865	0.624518	0.937301	0.619452	WP_029058793.1	WP_029058793.1	5978
23.364	23.0435	23.4198	23.4799	23.414	23.3801						43	43	43	92.5	92.5	92.5	49.067	0	143.05	1367500000	158	0.544506	0.588455	-0.148877	-0.674128	WP_029058799.1	WP_029058799.1	5982
21.5322	21.4791	21.5137	21.5846	21.8017	21.2914						11	11	11	54.7	54.7	54.7	26.616	0	46.451	415780000	52	0.125319	0.87715	-0.0508976	-0.204666	WP_029058803.1	WP_029058803.1	5985
22.5546	22.3724	22.6967	22.3621	22.8036	23.0365						27	27	27	79.6	79.6	79.6	30.414	0	108.35	765820000	70	0.368388	0.63573	-0.192805	-0.604601	WP_029058805.1	WP_029058805.1	5987
20.8493	19.6246	20.1552	19.7402	17.7127	18.7633						2	2	2	34.2	34.2	34.2	8.2494	0	18.267	17282000	11	1.00846	0.141681	1.47095	1.8752	WP_029058806.1	WP_029058806.1	5988
23.1789	22.9889	23.694	23.754	23.5181	23.768						36	36	36	70.8	70.8	70.8	77.293	0	165.6	1188900000	137	0.804636	0.317073	-0.392746	-1.20588	WP_029058810.1	WP_029058810.1	5992
22.1719	19.3899	18.7436	19.9731	21.7881	22.831						9	9	9	97.3	97.3	97.3	12.406	0	37.92	425440000	27	0.459335	0.409367	-1.42893	-0.990323	WP_029058812.1	WP_029058812.1	5994
26.2987	26.2425	25.8433	25.5203	25.8844	25.8851						38	38	38	95.1	95.1	95.1	23.549	0	236.47	6293400000	346	0.906244	0.291937	0.364893	1.26744	WP_029058818.1	WP_029058818.1	5998
19.601	19.4066	18.7431	19.7081	19.0054	19.0287						9	9	9	44.5	44.5	44.5	30.856	0	7.3115	46386000	19	0.00268222	0.997161	0.00285021	0.00637365	WP_029058820.1	WP_029058820.1	6000
26.7494	26.6693	27.2202	26.9727	27.3268	27.2935						64	64	64	97.5	97.5	97.5	45.346	0	323.31	16358000000	474	0.705884	0.385443	-0.31803	-1.04061	WP_029058823.1	WP_029058823.1	6001
19.5709	24.435	24.798	24.5042	24.877	24.42						9	9	9	36.9	36.9	36.9	28.65	0.39744	-0.22764	2463900000	20	0.419812	0.436449	-1.66574	-0.930078	WP_029058825.1	WP_029058825.1	6003
23.6874	23.3982	24.0075	24.3534	24.6677	24.4616						71	71	71	70.4	70.4	70.4	95.989	0	323.31	2268400000	235	1.79575	0.106065	-0.796524	-2.66694	WP_029058828.1	WP_029058828.1	6006
22.9257	22.5852	23.1206	23.1241	23.1149	22.8812						23	23	23	70.1	70.1	70.1	38.387	0	182.57	839410000	106	0.39159	0.642262	-0.162886	-0.591225	WP_029058829.1	WP_029058829.1	6007
19.0748	19.8054	17.5718	20.7932	20.3926	18.4793						14	14	14	53.6	53.6	53.6	33.041	0	17.619	241610000	24	0.479213	0.405301	-1.07105	-1.00042	WP_029058830.1	WP_029058830.1	6008
22.419	20.5127	23.0672	23.3038	23.2908	22.7542						24	24	24	76	76	76	34.303	0	33.314	809580000	60	0.639591	0.292505	-1.11664	-1.25784	WP_029058832.1	WP_029058832.1	6009
21.7419	21.4246	21.0898	21.8805	22.1077	22.069						38	38	38	69.6	69.6	69.6	53.795	0	85.828	392720000	77	1.39334	0.123159	-0.600281	-1.99488	WP_029058833.1	WP_029058833.1	6010
22.5364	21.4188	23.0877	23.1118	23.4641	23.6381						40	40	39	62	62	62	91.776	0	108.77	1153100000	98	0.961514	0.176717	-1.05703	-1.7194	WP_029058840.1	WP_029058840.1	6015
25.2144	25.1149	24.7407	25.026	25.0716	24.8365						46	46	46	80	80	80	53.788	0	227.06	2996000000	261	0.100918	0.893735	0.0452894	0.173406	WP_029058847.1	WP_029058847.1	6021
21.9094	21.1602	21.5548	20.9648	22.3479	21.8196						20	20	20	87.7	87.7	87.7	16.343	0	71.436	532100000	52	0.136652	0.821139	-0.169297	-0.303734	WP_029058857.1	WP_029058857.1	6027
18.572	19.4285	18.7226	20.4032	18.3668	18.7741						11	11	11	41.2	41.2	41.2	44.031	0.0026082	2.2851	30147000	17	0.151022	0.783362	-0.273635	-0.352696	WP_029058864.1	WP_029058864.1	6033
27.5486	27.6575	26.6903	25.6316	25.9631	26.4996						21	21	21	57.7	57.7	57.7	46.879	0	323.31	8070100000	206	1.48008	0.107286	1.26736	2.55073	WP_029058865.1	WP_029058865.1	6034
23.4984	22.5337	21.6516	18.7385	18.9696	20.9263						15	15	15	48	48	48	48.759	0	120.19	143080000	44	1.58273	0.0839636	3.0164	3.09309	WP_029058869.1	WP_029058869.1	6037
25.7538	25.4799	26.0417	26.2901	26.2289	26.3172						162	162	161	82.9	82.9	82.6	198.72	0	323.31	8085200000	765	1.46902	0.126876	-0.520226	-1.96851	WP_029058889.1	WP_029058889.1	6051
19.3138	20.8035	21.8389	18.7215	21.1589	21.0608						10	10	10	58	58	58	21.532	0	50.811	227230000	21	0.113384	0.830808	0.338346	0.286139	WP_029058892.1	WP_029058892.1	6052
22.8478	21.5192	22.7234	22.8454	23.2209	22.5303						28	28	28	60.3	60.3	60.3	57.686	0	159.2	819510000	91	0.463318	0.467194	-0.502033	-0.883361	WP_029058893.1	WP_029058893.1	6053
22.6735	22.6031	23.2156	22.9194	23.4018	22.9948						18	18	18	60.5	60.5	60.5	35.754	0	95.949	1020200000	62	0.488601	0.521728	-0.2746	-0.796569	WP_029058896.1	WP_029058896.1	6055
20.2315	18.9451	19.9181	18.5588	20.6558	20.3729						14	14	14	52.6	52.6	52.6	34.364	0	28.815	151070000	28	0.0757357	0.884112	-0.164287	-0.190455	WP_029058897.1	WP_029058897.1	6056
20.4327	20.2639	19.4529	19.5507	19.0648	17.3777						14	14	14	37.5	37.5	37.5	43.752	0	12.41	31730000	26	0.891254	0.186451	1.38544	1.68011	WP_029058898.1	WP_029058898.1	6057
21.2304	20.0289	21.6531	21.8262	18.8245	21.8523						8	8	8	38.2	38.2	38.2	33.6	0	51.518	261350000	31	0.0416216	0.924487	0.136471	0.112182	WP_029058899.1	WP_029058899.1	6058
20.89	20.7439	21.0445	20.5676	20.8418	20.8029						12	12	12	63.3	63.3	63.3	26.922	0	29.167	203140000	43	0.565954	0.575109	0.155359	0.699968	WP_029058902.1	WP_029058902.1	6061
22.3164	22.3853	22.5729	19.5077	21.3143	21.2748						34	34	34	50.8	50.8	50.8	81.178	0	75.558	215180000	77	1.34378	0.105235	1.72594	2.4633	WP_029058907.1	WP_029058907.1	6064
18.452	19.3729	19.9389	19.5558	18.7934	18.6867						10	10	10	42.6	42.6	42.6	31.65	0.0005711	4.2255	39105000	17	0.180078	0.758189	0.242624	0.396146	WP_029058908.1	WP_029058908.1	6065
20.8691	20.9437	22.6472	20.5711	21.5807	19.2439						22	22	22	56.9	56.9	56.9	61.333	0	30.762	244110000	41	0.500526	0.393169	1.02145	1.03006	WP_029058909.1	WP_029058909.1	6066
21.853	21.1426	21.7843	22.0175	22.9265	22.4154						26	26	26	48.2	48.2	48.2	61.154	0	199.01	667490000	69	1.16519	0.136745	-0.859805	-1.92358	WP_029058910.1	WP_029058910.1	6067
26.6125	26.5305	27.2807	25.5752	26.0012	26.0215						27	27	27	98.2	98.2	98.2	35.184	0	323.31	6545100000	309	1.55665	0.104343	0.941911	2.48803	WP_029058912.1	WP_029058912.1	6068
22.2152	22.617	23.3166	22.8909	23.1565	22.9264						6	6	6	17	17	17	37.852	0	51.657	866920000	59	0.342435	0.612523	-0.275003	-0.636015	WP_029058913.1	WP_029058913.1	6069
23.6981	23.8638	23.9018	23.3286	23.79	23.905						21	21	21	88.8	88.8	88.8	28.89	0	78.946	1293100000	101	0.321967	0.681241	0.146687	0.511246	WP_029058914.1	WP_029058914.1	6070
21.2769	20.5819	21.3173	20.8873	20.6965	19.9665						9	9	9	33.1	33.1	33.1	33.376	0	24.426	188440000	28	0.667124	0.337088	0.541922	1.15704	WP_029058915.1	WP_029058915.1	6071
25.3481	25.2034	25.7926	25.4567	25.6083	25.6276						57	57	57	95.3	95.3	95.3	54.885	0	289.62	5287700000	315	0.248162	0.752105	-0.116169	-0.407172	WP_029058916.1	WP_029058916.1	6072
24.0195	23.865	24.3499	24.2192	24.4232	24.421						43	43	43	63.5	63.5	63.5	63.6	0	248.1	2847100000	191	0.807872	0.375588	-0.276316	-1.07013	WP_029058917.1	WP_029058917.1	6073
23.1951	22.9721	23.2473	22.5487	22.6431	22.8782						16	16	16	91	91	91	21.59	0	62.234	647530000	64	1.59055	0.129813	0.448154	1.95452	WP_029058918.1	WP_029058918.1	6074
18.5881	21.3298	18.9154	18.919	21.6941	21.2546						22	22	21	48.4	48.4	46.9	59.418	0	8.2574	203810000	31	0.343179	0.53978	-1.01149	-0.766122	WP_029058921.1	WP_029058921.1	6075
20.6734	20.0055	20.2398	19.6626	20.3233	20.3781						5	5	5	96.6	96.6	96.6	8.4006	0	55.722	87026000	16	0.241527	0.711317	0.184867	0.459972	WP_029058923.1	WP_029058923.1	6077
26.2225	25.9423	26.6851	22.3955	22.7602	23.6835				+	2AEP P_Pi	24	24	24	67.6	67.6	67.6	38.722	0	224.3	1638300000	141	2.78927	0.0387143	3.33694	6.17677	WP_029058924.1	WP_029058924.1	6078
21.8289	21.051	21.6487	21.3658	22.2613	22.122						13	13	13	66.3	66.3	66.3	32.424	0	83.367	484340000	65	0.486003	0.470023	-0.406818	-0.876329	WP_029058928.1	WP_029058928.1	6081
21.8153	21.7925	21.9781	21.6908	22.3174	22.281						19	19	19	95.5	95.5	95.5	20.581	0	49.025	532560000	64	0.482172	0.543921	-0.23443	-0.753016	WP_029058930.1	WP_029058930.1	6083
20.3613	18.5949	21.2174	19.8322	21.0878	21.5844						9	9	9	55	55	55	27.753	0	14.871	241550000	33	0.345572	0.54439	-0.776877	-0.753031	WP_029058933.1	WP_029058933.1	6084
26.119	26.0335	26.3223	26.0399	26.4175	26.2019						43	43	43	89.1	89.1	89.1	36.787	0	314.04	8235300000	350	0.166939	0.844671	-0.0614955	-0.257402	WP_029058935.1	WP_029058935.1	6086
23.7339	23.6395	24.2015	22.8978	23.8875	23.9019						25	25	25	71.9	71.9	71.9	39.699	0	98.29	1612000000	95	0.324017	0.621438	0.295888	0.622929	WP_029058937.1	WP_029058937.1	6087
19.7011	19.9429	18.758	19.1535	20.9414	20.74						7	7	7	48.6	48.6	48.6	14.968	0	12.64	148740000	23	0.53248	0.381851	-0.810939	-1.05169	WP_029058938.1	WP_029058938.1	6088
24.7394	24.7476	24.9576	25.2314	25.2411	25.241						34	34	34	71.1	71.1	71.1	42.145	0	225.9	3605200000	231	2.38916	0.105663	-0.423005	-2.46692	WP_029058941.1	WP_029058941.1	6091
22.6463	22.8476	22.9985	22.9562	22.2665	22.7419						20	20	20	82.2	82.2	82.2	31.44	0	148.41	744100000	61	0.315888	0.672189	0.175959	0.536589	WP_029058944.1	WP_029058944.1	6093
25.4108	25.0558	24.7315	27.2129	27.3764	27.1874				+	2AEP P_Pi	62	62	61	83.7	83.7	83.7	56.069	0	323.31	14547000000	498	3.3644	0.032	-2.19285	-7.1915	WP_029058947.1	WP_029058947.1	6095
25.2304	24.5317	24.2483	24.9617	25.0456	25.3038						21	21	21	75.8	75.8	75.8	20.984	0	215.48	3173100000	145	0.631075	0.379898	-0.433542	-1.05879	WP_029058948.1	WP_029058948.1	6096
20.0572	20.3378	20.5909	23.7699	24.8122	24.6557				+	2AEP P_Pi	30	30	30	60.4	60.4	60.4	63.936	0	223.01	2362700000	149	3.46673	0.0328	-4.08398	-8.89295	WP_029058949.1	WP_029058949.1	6097
19.0548	19.3055	19.1099	20.6566	20.5036	20.5393				+	2AEP P_Pi	10	10	10	56.7	56.7	56.7	34.737	0	13.104	126420000	24	4.03263	0.036	-1.40976	-7.45968	WP_029058950.1	WP_029058950.1	6098
19.1958	19.6416	18.4865	19.699	19.5293	19.1607						9	9	9	41.3	41.3	41.3	29.877	0	7.9648	65854000	15	0.404618	0.544021	-0.355037	-0.75224	WP_029058957.1	WP_029058957.1	6103
21.1592	19.6487	19.1457	17.9141	21.1637	20.9586						7	7	7	57.8	57.8	57.8	22.47	0	31.508	190440000	22	0.00748775	0.989545	-0.0276356	-0.0210569	WP_029058959.1	WP_029058959.1	6105
20.4082	20.0615	20.9214	20.3981	21.4576	20.987						17	17	17	44.6	44.6	44.6	50.032	0	61.53	220020000	42	0.54034	0.416745	-0.483882	-0.976776	WP_029058961.1	WP_029058961.1	6107
19.312	18.807	18.5483	20.1909	19.3327	19.6865						6	6	6	26.8	26.8	26.8	18.665	0	12.394	80754000	21	1.189	0.131209	-0.847602	-1.94799	WP_029058962.1	WP_029058962.1	6108
22.7925	22.5803	22.8539	22.7691	23.7001	23.4565						41	41	41	72.7	72.7	72.7	64.211	0	189.34	1222800000	151	0.908979	0.24183	-0.566337	-1.44914	WP_029058964.1	WP_029058964.1	6109
20.4845	20.3348	20.9493	21.1218	22.2167	21.2954						54	54	54	68.1	68.1	68.1	90.356	0	47.755	379690000	71	1.16094	0.128059	-0.955057	-1.96172	WP_029058967.1	WP_029058967.1	6112
20.9649	19.1271	21.2444	21.2425	22.2396	21.496						39	39	39	66.1	66.1	66.1	79.015	0	105.53	428670000	78	0.767208	0.236524	-1.21392	-1.46542	WP_029058968.1	WP_029058968.1	6113
21.472	19.8969	20.558	21.9385	22.7995	22.6344						32	32	32	64.7	64.7	64.7	59.905	0	68.936	611420000	74	1.58087	0.0946032	-1.81515	-2.89321	WP_029058969.1	WP_029058969.1	6114
22.2631	22.2062	21.6332	22.1478	22.2358	22.0804						21	21	21	64.7	64.7	64.7	30.403	0	52.604	494930000	60	0.229067	0.758183	-0.120534	-0.393736	WP_029058970.1	WP_029058970.1	6115
21.8252	21.7651	21.3652	21.7836	22.2523	21.7257						20	20	20	39.6	39.6	39.6	62.749	0	72.07	473340000	68	0.537523	0.493922	-0.268667	-0.838206	WP_029058972.1	WP_029058972.1	6117
22.6485	22.264	22.6262	22.6243	22.7514	22.7367						19	19	19	42.6	42.6	42.6	50.439	0	103.77	819220000	85	0.66174	0.497633	-0.191212	-0.828086	WP_029058977.1	WP_029058977.1	6120
21.9939	20.804	21.4116	21.5965	22.0473	21.6991						19	19	19	63.3	63.3	63.3	37.119	0	25.054	430380000	58	0.438262	0.516782	-0.377782	-0.804428	WP_029058982.1	WP_029058982.1	6125
21.1572	18.8457	18.5007	19.317	20.4656	20.583						9	9	9	53.3	53.3	53.3	19.25	0	17.783	165550000	18	0.267906	0.636335	-0.620691	-0.604616	WP_029058989.1	WP_029058989.1	6130
22.7389	22.7266	23.0486	19.6942	22.0262	21.8844						16	16	16	34.3	34.3	34.3	35.005	0	75.643	408290000	69	1.0075	0.139187	1.63644	1.89816	WP_029058992.1	WP_029058992.1	6133
22.3068	20.9636	22.7793	19.132	23.8136	23.543						55	55	55	50.3	50.3	50.3	129.01	0	104.68	991550000	110	0.0305665	0.940035	-0.14632	-0.0854696	WP_029058995.1	WP_029058995.1	6136
21.6808	21.9167	22.1914	22.0283	21.8895	21.5538						18	18	18	70.5	70.5	70.5	43.059	0	54.591	294860000	60	0.19961	0.78737	0.105743	0.347871	WP_029059001.1	WP_029059001.1	6141
24.4478	24.7417	24.6944	24.4186	22.5135	23.5152						47	47	47	43.5	43.5	43.5	135.69	0	42.185	750200000	84	0.96183	0.172704	1.14552	1.74174	WP_029059003.1	WP_029059003.1	6143
23.8819	23.7804	24.1069	24.2351	24.5541	24.3313						40	40	40	63.2	63.2	63.2	61.534	0	202.42	2297000000	197	1.53824	0.138727	-0.450441	-1.9164	WP_029059012.1	WP_029059012.1	6149
24.4191	24.1101	24.6041	23.866	23.6821	23.7809						20	20	20	63.5	63.5	63.5	25.691	0	119.02	1449700000	139	1.76195	0.109928	0.601475	2.37195	WP_029059020.1	WP_029059020.1	6153
23.7108	23.3689	22.508	23.8999	23.8413	24.0327						18	18	18	55.3	55.3	55.3	32.304	0	90.015	1635300000	92	0.940819	0.209695	-0.728731	-1.57639	WP_029059023.1	WP_029059023.1	6156
24.5279	24.5464	24.7074	24.8866	25.0742	24.8426						57	57	56	60.3	60.3	58.8	76.333	0	219.82	3451400000	262	1.69669	0.162501	-0.340587	-1.78277	WP_029059032.1	WP_029059032.1	6162
22.9575	23.3067	23.3602	23.5567	23.7039	23.3574						22	22	22	59.3	59.3	59.3	42.722	0	137.85	1036700000	77	0.961255	0.291621	-0.33119	-1.26733	WP_029059034.1	WP_029059034.1	6164
24.4089	23.686	24.7443	24.6135	24.9189	24.803						74	74	74	60.9	60.9	60.9	119.38	0	323.31	3021700000	301	0.700444	0.32979	-0.498738	-1.17438	WP_029059037.1	WP_029059037.1	6165
22.6189	22.0817	21.7582	21.4492	22.2973	22.2133						12	12	12	77.1	77.1	77.1	17.122	0	78.596	614010000	51	0.170656	0.782142	0.166354	0.355084	WP_029059038.1	WP_029059038.1	6166
20.7688	20.899	20.715	20.6159	20.469	20.6055						9	9	9	50	50	50	17.771	0	17.018	145160000	12	1.47996	0.266087	0.230763	1.33956	WP_029059039.1	WP_029059039.1	6167
22.0615	21.3304	22.6562	22.4769	22.8666	22.6622						11	11	11	45.2	45.2	45.2	34.146	0	77.192	800120000	49	0.750001	0.278276	-0.65251	-1.30606	WP_029059041.1	WP_029059041.1	6169
22.3838	22.3542	22.1257	22.2038	22.4233	22.424						23	23	23	72	72	72	33.753	0	61.942	674090000	82	0.222295	0.821624	-0.0624638	-0.297938	WP_029059042.1	WP_029059042.1	6170
19.6576	18.8001	18.5875	20.953	20.5798	20.0846						13	13	13	43	43	43	40.398	0	29.085	179070000	27	1.67881	0.0867769	-1.52404	-2.97313	WP_029059045.1	WP_029059045.1	6173
24.994	24.9079	25.1972	25.3324	25.5378	25.4467						30	30	30	74.9	74.9	74.9	42.746	0	229.66	4361500000	232	1.75241	0.124773	-0.405931	-1.98653	WP_029059046.1	WP_029059046.1	6174
20.5828	20.5362	20.0219	19.1712	21.0331	20.4868						6	6	6	42.3	42.3	42.3	14.793	0	7.6076	168700000	14	0.0919955	0.867655	0.149939	0.220157	WP_029059052.1	WP_029059052.1	6177
25.4088	25.0383	24.5885	24.322	24.6618	24.7873						27	27	27	90.2	90.2	90.2	23.765	0	282.42	2812500000	261	0.699022	0.346967	0.421525	1.12433	WP_029059059.1	WP_029059059.1	6182
22.3925	22.158	22.0118	21.4733	22.3081	22.6785						15	15	15	78.4	78.4	78.4	22.13	0	87.657	595560000	69	0.0308075	0.953469	0.0341409	0.0721386	WP_029059067.1	WP_029059067.1	6187
19.0258	19.4081	19.4865	19.1679	19.4504	19.2892						4	4	4	24.7	24.7	24.7	23.911	0.00055036	3.2476	65254000	13	0.00858338	0.99198	0.00428454	0.0162184	WP_029059069.1	WP_029059069.1	6188
22.9271	21.8495	22.4233	22.0602	23.0419	22.943						21	21	21	82	82	82	33.596	0	124.85	875070000	93	0.253794	0.679946	-0.281743	-0.521012	WP_029059079.1	WP_029059079.1	6195
18.5339	19.3843	19.8339	19.263	20.939	20.4509						16	16	16	61.2	61.2	61.2	26.76	0	72.383	170530000	34	0.703738	0.266618	-0.966935	-1.33029	WP_029059081.1	WP_029059081.1	6197
19.5235	20.6379	20.7391	18.8339	20.5369	20.4931						10	10	10	56.5	56.5	56.5	24.315	0	16.42	144030000	26	0.194303	0.721368	0.345544	0.441582	WP_029059084.1	WP_029059084.1	6199
18.9068	19.9163	18.5847	19.6857	19.8729	19.3084						5	5	5	21	21	21	27.814	0	6.3838	80137000	14	0.487802	0.447534	-0.48641	-0.910695	WP_029059085.1	WP_029059085.1	6200
24.0264	23.9914	23.836	23.9835	24.1185	23.909						22	22	22	77.7	77.7	77.7	33.34	0	140.49	1677200000	168	0.24441	0.830443	-0.0524426	-0.283831	WP_029059092.1	WP_029059092.1	6206
22.547	19.5214	22.8058	22.2032	22.2101	22.0301						13	13	13	56.4	56.4	56.4	28.403	0	41.628	296770000	36	0.189543	0.714348	-0.523061	-0.452493	WP_029059096.1	WP_029059096.1	6207
25.5823	25.4287	25.4302	25.0296	25.1733	25.1893						21	21	21	62.2	62.2	62.2	36.313	0	221.05	4213600000	209	2.08216	0.120177	0.349667	2.03365	WP_029059097.1	WP_029059097.1	6208
25.231	24.7404	24.8291	24.2319	24.992	24.8931						16	16	16	60.3	60.3	60.3	22.122	0	126.57	2667000000	126	0.332661	0.643367	0.227859	0.595978	WP_029059100.1	WP_029059100.1	6211
19.9666	20.092	19.1663	20.3536	18.639	19.5424						15	15	15	76.9	76.9	76.9	26.405	0.0016234	2.883	142610000	18	0.149279	0.790751	0.229937	0.341234	WP_029059101.1	WP_029059101.1	6212
23.335	23.0964	23.5487	23.7604	23.4077	23.5176						31	31	31	74	74	74	39.212	0	136.69	1269600000	106	0.6344	0.469006	-0.235193	-0.880507	WP_029059102.1	WP_029059102.1	6213
24.5742	24.3305	23.8415	23.6021	23.558	23.7336						25	25	25	73.9	73.9	73.9	39.22	0	90.782	1286600000	111	1.30465	0.138274	0.61753	1.91918	WP_029059103.1	WP_029059103.1	6214
22.116	22.4395	22.5623	21.7474	21.8247	22.0793						13	13	13	68.6	68.6	68.6	17.704	0	76.292	490040000	35	1.36972	0.148474	0.488804	1.83309	WP_029059105.1	WP_029059105.1	6216
21.7299	21.7534	21.3277	21.1979	21.1926	21.0426						16	16	16	86.3	86.3	86.3	19.446	0	49.401	209780000	51	1.44916	0.144597	0.459274	1.85764	WP_029059106.1	WP_029059106.1	6217
18.9346	21.8633	21.2936	22.6309	18.5017	19.4526						10	10	10	52.2	52.2	52.2	31.455	0	11.822	100650000	19	0.119027	0.819826	0.502131	0.306737	WP_029059107.1	WP_029059107.1	6218
23.5154	22.6449	23.0874	21.9345	21.9456	22.3526						11	11	11	47.9	47.9	47.9	30.664	0	16.594	580690000	38	1.60694	0.110651	1.005	2.60024	WP_029059108.1	WP_029059108.1	6219
22.7087	22.7393	23.0758	22.0078	21.9659	21.7545						8	8	8	19.2	19.2	19.2	47.304	0	94.571	330720000	34	2.56204	0.0735	0.931849	3.86119	WP_029059109.1	WP_029059109.1	6220
22.8169	22.3733	22.4211	20.6985	21.4569	21.5322						9	9	9	36	36	36	19.94	0	44.533	392500000	43	1.9132	0.0778969	1.3079	3.26105	WP_029059110.1	WP_029059110.1	6221
19.3406	18.7626	19.8579	19.5027	19.4361	19.2601						19	19	18	32.7	32.7	31.4	68.065	0	19.029	51952000	27	0.0866709	0.886209	-0.0792548	-0.186684	WP_029059111.1	WP_029059111.1	6222
22.7354	22.0405	23.4044	23.3357	23.6809	23.6349						21	21	21	71.9	71.9	71.9	36.461	0	138.15	1390400000	79	0.943541	0.200711	-0.823704	-1.62027	WP_029059124.1	WP_029059124.1	6229
22.0837	20.1774	22.1811	18.6738	18.123	19.6818						19	19	19	34.2	34.2	34.2	100.63	0	10.35	142800000	24	1.53781	0.0860656	2.65451	2.96231	WP_029059125.1	WP_029059125.1	6230
19.1793	18.7769	18.1781	19.2141	20.4001	20.2559						17	17	17	46	46	46	74.285	0	8.4554	170310000	23	1.23512	0.118537	-1.24526	-2.1713	WP_029059126.1	WP_029059126.1	6231
19.1605	19.9849	18.5074	19.6913	20.7397	20.2701						12	12	12	75.6	75.6	75.6	22.505	0	8.6056	156450000	19	0.904636	0.199151	-1.01609	-1.6281	WP_029059130.1	WP_029059130.1	6234
19.8894	20.3311	19.2611	19.4958	19.7254	19.5639						17	17	17	48.9	48.9	48.9	45.167	0	8.826	81374000	27	0.296207	0.662938	0.232171	0.555651	WP_029059150.1	WP_029059150.1	6251
21.5837	19.1513	18.6456	21.7352	19.9827	21.3836						9	9	9	47.6	47.6	47.6	27.336	0	53.051	250100000	19	0.516882	0.373554	-1.24032	-1.07564	WP_029059151.1	WP_029059151.1	6252
25.935	25.8258	26.6494	26.3978	26.2702	26.486						41	41	41	60.9	60.9	60.9	86.511	0	323.31	7807900000	397	0.394015	0.58773	-0.24794	-0.677911	WP_029059156.1	WP_029059156.1	6256
16.7058	19.9744	16.4332	19.3945	16.6488	17.1279						7	7	7	23.3	23.3	23.3	42.104	0.31206	-0.014513	10229000	16	0.00445015	0.99561	-0.0192782	-0.0126979	WP_029059158.1	WP_029059158.1	6258
24.5411	21.2925	22.0359	19.6527	18.5039	19.1053						19	19	19	79.6	79.6	79.6	33.487	0	111.76	212300000	47	1.56784	0.0835185	3.53589	3.10933	WP_029059160.1	WP_029059160.1	6260
19.397	20.3808	18.1709	19.1797	19.5475	19.374						12	12	12	46.6	46.6	46.6	28.656	0	23.255	71451000	18	0.0262908	0.956032	-0.0508149	-0.0679369	WP_029059161.1	WP_029059161.1	6261
23.1463	22.8032	23.101	22.6043	22.2056	22.3214						19	19	19	71.4	71.4	71.4	32.04	0	68.291	542110000	67	1.7918	0.104214	0.639772	2.46061	WP_029059162.1	WP_029059162.1	6262
21.4376	19.6003	21.3147	21.2242	21.3194	21.5907						22	22	22	81.1	81.1	81.1	29.581	0	32.412	289480000	39	0.41966	0.489803	-0.593896	-0.844708	WP_029059164.1	WP_029059164.1	6264
24.1619	24.0799	24.2804	24.199	24.4151	24.6495						28	28	28	68.1	68.1	68.1	41.354	0	254.73	2577900000	183	0.801644	0.396686	-0.24712	-1.01909	WP_029059167.1	WP_029059167.1	6265
21.6827	20.5157	20.7032	19.4058	21.6758	21.8926						21	21	21	90.6	90.6	90.6	25.617	0	76.817	332810000	57	0.00912342	0.987529	-0.0242214	-0.0248752	WP_029059168.1	WP_029059168.1	6266
21.5389	19.4859	19.029	21.8097	22.6297	22.3117						10	10	10	50.2	50.2	50.2	32.713	0	64.403	539170000	31	1.29515	0.103212	-2.23242	-2.45888	WP_029059171.1	WP_029059171.1	6267
22.2837	22.2291	22.0764	21.6519	21.4096	21.4892						18	18	18	98	98	98	22.86	0	41.114	317410000	61	2.70265	0.0701818	0.679497	3.4933	WP_029059172.1	WP_029059172.1	6268
24.0534	24.0035	23.8294	23.5301	23.1269	23.418						19	19	19	79.1	79.1	79.1	28.813	0	75.429	834750000	82	1.92359	0.108128	0.603786	2.53674	WP_029059173.1	WP_029059173.1	6269
24.0044	23.8847	23.873	23.7519	23.8407	23.8143						36	36	35	92.2	92.2	92.2	40.892	0	125.23	1503700000	201	1.12348	0.524976	0.118438	0.791818	WP_029059175.1	WP_029059175.1	6270
21.6407	21.4258	21.5482	20.938	20.8104	20.7369						9	9	9	85.5	85.5	85.5	14.06	0	42.413	194550000	44	2.93809	0.0715821	0.709812	3.82504	WP_029059176.1	WP_029059176.1	6271
20.849	20.2077	22.133	21.6	22.6282	22.6669						23	23	23	57.1	57.1	57.1	45.707	0	88.948	649870000	65	0.863654	0.201233	-1.23514	-1.61426	WP_029059182.1	WP_029059182.1	6275
20.4689	19.8979	19.6487	19.0659	20.7971	20.5484						16	16	16	48.8	48.8	48.8	53.413	0	10.436	154570000	42	0.0784976	0.884783	-0.131962	-0.190577	WP_029059189.1	WP_029059189.1	6281
24.5824	23.806	23.5306	22.3361	23.4884	23.5922						33	33	33	78.3	78.3	78.3	49.285	0	173.66	1227000000	157	0.749643	0.260048	0.834108	1.36508	WP_029059190.1	WP_029059190.1	6282
21.4589	21.2412	22.671	19.0118	21.1814	18.219						19	19	19	46	46	46	56.207	0	17.175	291890000	44	1.10079	0.116507	2.31965	2.12644	WP_029059199.1	WP_029059199.1	6289
20.0006	20.0144	19.3762	19.6909	20.0092	19.797						10	10	10	38.6	38.6	38.6	27.296	0	10.149	103020000	30	0.0528069	0.926924	-0.0353355	-0.106965	WP_029059207.1	WP_029059207.1	6295
22.6627	22.8993	23.4031	22.1791	22.6861	22.337						9	9	9	32.7	32.7	32.7	47.626	0	98.633	500090000	38	1.04256	0.20167	0.587664	1.61103	WP_029059210.1	WP_029059210.1	6298
21.9834	18.8305	18.8283	20.2301	21.36	21.5911						12	12	12	40.8	40.8	40.8	64.327	0	48.09	232520000	27	0.448151	0.423028	-1.17964	-0.957262	WP_029059212.1	WP_029059212.1	6300
21.9389	21.9329	22.9526	19.9446	21.9916	22.6202						20	20	20	54.3	54.3	54.3	54.855	0	59.588	383730000	45	0.359723	0.53521	0.755986	0.774602	WP_029059215.1	WP_029059215.1	6303
25.0456	24.948	26.3355	25.9577	26.0755	25.9542						78	78	78	89.2	89.2	89.2	81.09	0	323.31	6771200000	427	0.544185	0.402995	-0.552748	-1.00702	WP_029059231.1	WP_029059231.1	6314
21.7141	18.4973	21.3312	19.1913	21.936	22.7149						14	14	14	73.6	73.6	73.6	36.583	0	32.512	423290000	36	0.200386	0.694934	-0.766486	-0.487127	WP_029059242.1	WP_029059242.1	6324
21.2299	21.311	20.5127	20.9282	20.8626	20.8137						7	7	7	53.9	53.9	53.9	12.129	0	33.13	198240000	23	0.229287	0.739155	0.149728	0.420773	WP_029059264.1	WP_029059264.1	6338
22.9644	19.9283	23.3823	22.0239	19.1886	18.2391						23	23	23	73.8	73.8	73.8	36.583	0	7.3012	234640000	32	0.653771	0.26291	2.27447	1.3588	WP_029059289.1	WP_029059289.1	6355
23.7566	23.3312	21.8608	21.1737	21.9831	22.0166						20	20	20	64.1	64.1	64.1	31.146	0	187.07	373590000	87	0.922946	0.18013	1.2584	1.70746	WP_029059300.1	WP_029059300.1	6362
22.1313	17.4478	20.2955	19.9799	20.5892	20.5723						12	12	12	37.3	37.3	37.3	40.312	0	12.684	184460000	34	0.111023	0.830593	-0.422279	-0.285876	WP_029059301.1	WP_029059301.1	6363
19.397	19.2881	19.9	19.7146	22.0816	21.7343						21	21	21	43.5	43.5	43.5	46.709	0	57.024	393720000	39	1.01585	0.138595	-1.64846	-1.91317	WP_029059316.1	WP_029059316.1	6371
18.756	22.681	18.3436	22.1571	22.312	18.9341						7	7	7	37.5	37.5	37.5	32.646	0.66053	-0.90681	430110000	13	0.27415	0.608564	-1.20756	-0.646735	WP_029059322.1	WP_029059322.1	6376
24.5971	24.2975	24.8378	24.2939	24.9508	24.8357						47	47	47	81.2	81.2	81.2	73.282	0	253.86	3251800000	235	0.171461	0.801686	-0.115962	-0.325921	WP_029059324.1	WP_029059324.1	6378
22.7562	22.5022	23.0529	22.5214	22.6145	22.2523						38	38	38	51.1	51.1	51.1	74.972	0	58.17	607230000	83	0.731753	0.381652	0.307718	1.05145	WP_029059329.1	WP_029059329.1	6382
19.0716	18.7018	19.013	19.0759	21.2187	21.563						14	14	14	52.1	52.1	52.1	34.163	0	30.568	240990000	31	1.00859	0.139663	-1.6904	-1.90696	WP_029059345.1	WP_029059345.1	6388
19.2515	19.6855	22.3572	21.4239	22.4192	22.1356						15	15	15	95.7	95.7	95.7	18.524	0	35.546	520490000	38	0.701512	0.251471	-1.56147	-1.40023	WP_029059356.1	WP_029059356.1	6396
19.2983	19.3109	18.8343	19.2067	19.5757	19.4017						3	3	3	10.4	10.4	10.4	41.255	0	10.248	60001000	8	0.58028	0.485114	-0.246861	-0.852379	WP_029059357.1	WP_029059357.1	6397
20.0106	18.5472	20.8743	20.7636	21.5635	22.1034						46	46	46	55.6	55.6	55.6	86.516	0	80.567	220820000	66	0.998398	0.140813	-1.66613	-1.88744	WP_029059359.1	WP_029059359.1	6399
20.4528	20.3928	20.1214	20.1843	17.6834	20.2063						21	21	21	67.6	67.6	67.6	41.019	0	10.042	124360000	31	0.4993	0.395248	0.964284	1.02201	WP_029059360.1	WP_029059360.1	6400
18.4292	19.6149	19.4251	19.9054	20.0948	19.9229						14	14	14	47.8	47.8	47.8	36.864	0	13.668	104220000	25	1.03071	0.174699	-0.817957	-1.73058	WP_029059361.1	WP_029059361.1	6401
27.2619	27.0844	27.3801	25.6412	26.1426	26.1557						49	49	49	81.1	81.1	81.1	58.393	0	323.31	7359800000	404	2.57507	0.0737358	1.26228	4.35393	WP_029059368.1	WP_029059368.1	6408
22.9258	22.9404	22.9035	19.7667	22.1065	22.234						16	16	16	72.9	72.9	72.9	25.663	0	83.507	424910000	65	0.904083	0.176448	1.55417	1.72285	WP_029059375.1	WP_029059375.1	6413
20.5879	20.1286	20.6224	18.9414	20.0709	18.3738						14	14	14	65.9	65.9	65.9	32.345	0	37.717	137410000	30	1.18312	0.115258	1.31756	2.11298	WP_029059376.1	WP_029059376.1	6414
21.458	21.2502	21.1942	20.0426	19.105	18.4029						7	7	7	43.1	43.1	43.1	17.333	0	10.347	49113000	15	1.93061	0.0692468	2.11731	3.63985	WP_029059379.1	WP_029059379.1	6416
24.1381	24.0719	24.6118	22.6816	23.3629	23.5637						52	52	52	49.4	49.4	49.4	100.1	0	322.7	786000000	187	1.5581	0.107933	1.07122	2.57207	WP_029059380.1	WP_029059380.1	6417
21.9548	22.2952	22.4951	22.1989	22.1072	22.5094						10	10	10	63.6	63.6	63.6	22.725	0	61.643	537990000	39	0.0400322	0.947301	-0.0234578	-0.0783964	WP_029059381.1	WP_029059381.1	6418
21.2141	18.8743	20.508	20.8948	20.6917	21.133						7	7	7	54.5	54.5	54.5	20.062	0	11.669	210580000	21	0.429475	0.46905	-0.707685	-0.879623	WP_029059382.1	WP_029059382.1	6419
18.6987	19.3065	20.4679	19.9372	21.3878	20.7696						26	26	26	67.2	67.2	67.2	44.311	0	47.861	229340000	40	0.838761	0.209771	-1.20718	-1.57216	WP_029059383.1	WP_029059383.1	6420
21.4512	18.4916	20.5501	20.906	21.6722	21.5659						27	27	27	73	73	73	34.381	0	46.282	393830000	71	0.599932	0.316997	-1.21705	-1.2073	WP_029059386.1	WP_029059386.1	6423
23.5603	23.2459	23.4784	23.8172	24.1749	24.0774						26	26	26	58.6	58.6	58.6	46.054	0	243.54	1642100000	114	1.85628	0.104804	-0.594958	-2.45497	WP_029059390.1	WP_029059390.1	6426
23.8111	23.5652	23.9264	24.0453	24.1305	23.7363						42	42	42	71.7	71.7	71.7	61.739	0	238.44	1915400000	206	0.562666	0.533492	-0.203113	-0.780467	WP_029059391.1	WP_029059391.1	6427
25.1627	25.1533	25.5506	26.3541	26.495	26.2827						53	53	53	84.7	84.7	84.7	55.705	0	323.31	8220300000	333	2.77325	0.0730196	-1.08837	-4.44241	WP_029059392.1	WP_029059392.1	6428
24.6827	24.6438	25.0593	25.9217	26.1646	26.0458						38	38	38	80.8	80.8	80.8	41.923	0	323.31	6582300000	295	2.94514	0.0659487	-1.24881	-4.99707	WP_029059393.1	WP_029059393.1	6429
20.8482	18.9709	20.3805	18.8197	21.276	21.5921						27	27	27	53.3	53.3	53.3	47.997	0	14.058	250080000	42	0.181175	0.728182	-0.496062	-0.434322	WP_029059395.1	WP_029059395.1	6431
23.1434	22.7811	23.265	23.8939	24.083	23.8794						47	47	47	60.1	60.1	60.1	70.081	0	130.25	1860000000	160	2.29487	0.0733187	-0.888943	-3.42649	WP_029059396.1	WP_029059396.1	6432
23.1328	22.9658	23.1518	23.0003	22.8702	22.8079						18	18	18	67.1	67.1	67.1	17.45	0	68.188	934650000	84	1.09511	0.382438	0.190665	1.0484	WP_029059398.1	WP_029059398.1	6434
19.2421	18.9612	19.8429	19.3903	20.9185	21.0866						7	7	7	31.2	31.2	31.2	25.936	0	29.623	203120000	11	0.867152	0.203539	-1.11646	-1.59726	WP_029059402.1	WP_029059402.1	6437
19.0335	19.43	18.6922	19.3064	19.48	20.6204						18	15	15	43.9	40.3	40.3	47.549	0	84.459	119570000	22	0.741949	0.267058	-0.750358	-1.33042	WP_029059408.1	WP_029059408.1	6441
20.6741	21.6501	20.4904	21.0536	21.2308	20.7367						11	11	11	41.4	41.4	41.4	26.953	0	30.55	278880000	42	0.0616005	0.908987	-0.0688267	-0.141093	WP_029059409.1	WP_029059409.1	6442
20.3054	20.5073	18.7211	19.4472	20.0342	20.1827						9	9	9	34.8	34.8	34.8	29.085	0	39.708	127770000	18	0.0238757	0.960866	-0.0433922	-0.0613102	WP_029059410.1	WP_029059410.1	6443
25.181	24.9047	25.3133	25.6176	25.8858	25.7092						51	51	51	81.1	81.1	81.1	71.216	0	247.98	6014000000	275	1.86454	0.10532	-0.604506	-2.47932	WP_029059414.1	WP_029059414.1	6447
24.792	24.7313	25.1373	24.7336	24.9633	25.0486						25	25	25	76.7	76.7	76.7	35.577	0	218.62	3184200000	200	0.0622941	0.926039	-0.0282663	-0.109731	WP_029059415.1	WP_029059415.1	6448
23.5731	23.6089	23.7923	24.0152	24.0352	24.0282						21	21	21	73.1	73.1	73.1	41.194	0	132.06	1552700000	132	2.24493	0.117509	-0.368104	-2.18903	WP_029059416.1	WP_029059416.1	6449
25.0237	24.9597	25.1767	25.3834	25.8067	25.6674						37	37	37	74.9	74.9	74.9	37.071	0	280.41	5566000000	298	1.8051	0.109757	-0.56577	-2.35538	WP_029059417.1	WP_029059417.1	6450
22.4234	21.2141	22.3805	21.6617	22.2763	21.5348						9	9	9	54	54	54	21.333	0	22.508	271730000	41	0.147839	0.802338	0.181763	0.325993	WP_029059419.1	WP_029059419.1	6451
21.4742	21.7621	20.9323	21.1655	21.616	21.3881						22	22	22	83.7	83.7	83.7	28.598	0	51.352	340610000	56	0.000331189	0.99942	-0.00028038	-0.000745978	WP_029059420.1	WP_029059420.1	6452
21.8877	21.6699	21.9069	21.8398	22.2389	21.9743						13	13	13	42.2	42.2	42.2	36.2	0	77.045	412720000	43	0.632811	0.504744	-0.196192	-0.818466	WP_029059421.1	WP_029059421.1	6453
21.9367	21.6931	20.9448	18.8927	22.0117	21.8378						9	9	9	91.9	91.9	91.9	8.3513	0	33.824	370060000	47	0.226444	0.674958	0.610771	0.528789	WP_029059426.1	WP_029059426.1	6457
21.9441	21.7544	21.9612	22.0611	21.8802	21.6166						13	13	13	52.9	52.9	52.9	27.471	0	49.18	412020000	55	0.0827873	0.91012	0.033954	0.138545	WP_029059427.1	WP_029059427.1	6458
21.625	21.7232	22.2081	18.7282	21.7262	21.3329						31	31	31	58.6	58.6	58.6	68.673	0	40.057	289910000	59	0.585314	0.326104	1.25633	1.18773	WP_029059428.1	WP_029059428.1	6459
23.4289	19.0375	22.6081	22.0647	23.2781	22.9887						18	18	18	51.9	51.9	51.9	59.49	0	52.11	504550000	58	0.318387	0.560074	-1.08566	-0.72533	WP_029059430.1	WP_029059430.1	6461
19.8237	19.2216	18.796	19.8756	18.6092	18.066						9	9	9	57	57	57	17.085	0	27.668	47127000	20	0.282506	0.637696	0.43018	0.602973	WP_029059433.1	WP_029059433.1	6463
21.8625	21.7308	22.1083	22.1433	22.0997	22.1238						14	14	14	44.7	44.7	44.7	39.156	0	90.957	500790000	50	0.930669	0.38346	-0.221691	-1.04896	WP_029059434.1	WP_029059434.1	6464
22.3916	22.9018	21.4196	20.9495	22.0316	22.1302						12	12	12	64	64	64	8.8804	0	31.025	466590000	67	0.390816	0.527143	0.533892	0.789511	WP_029059436.1	WP_029059436.1	6466
20.6223	19.342	20.0216	18.7918	20.1816	20.2786						22	22	22	45.5	45.5	45.5	58.278	0	13.325	132590000	33	0.150505	0.787797	0.244655	0.346478	WP_029059439.1	WP_029059439.1	6467
19.2912	19.8954	19.552	19.3266	18.9711	19.2217						4	4	4	27.7	27.7	27.7	9.7264	0	7.3751	41933000	28	0.92998	0.267396	0.406423	1.33575	WP_029059443.1	WP_029059443.1	6469
26.9139	26.7469	27.0549	26.6826	26.9402	26.9564						50	50	50	97.9	97.9	97.9	39.678	0	323.31	11516000000	542	0.133308	0.878331	0.0454845	0.201564	WP_029059444.1	WP_029059444.1	6470
21.7076	22.57	22.149	21.843	21.9406	21.7805						4	4	4	12.7	12.7	12.7	16.315	0	36.096	425310000	36	0.495223	0.508404	0.287514	0.813826	WP_029059445.1	WP_029059445.1	6471
23.607	23.2177	24.2205	23.6892	24.2934	24.2768						19	19	19	32	32	32	47.827	0	142.93	1891900000	86	0.500857	0.460417	-0.404724	-0.893258	WP_029059446.1	WP_029059446.1	6472
19.3571	19.8955	19.3922	18.7991	19.0383	19.5859						8	8	8	80.5	80.5	80.5	9.751	0	10.343	64103000	25	0.631065	0.385253	0.407152	1.04229	WP_029059447.1	WP_029059447.1	6473
25.1834	25.1469	25.3606	25.4111	25.5016	25.3369						49	49	49	85.4	85.4	85.4	50.956	0	323.31	5104500000	286	1.07575	0.393977	-0.186242	-1.0268	WP_029059451.1	WP_029059451.1	6476
19.2829	19.5436	17.8478	19.4763	19.2252	19.3122						7	7	7	63.4	63.4	63.4	4.9239	0.00057045	4.2063	63483000	13	0.347881	0.571595	-0.446439	-0.706009	WP_029059454.1	WP_029059454.1	6479
22.0614	20.7844	21.7802	21.6513	22.0505	21.9824						13	13	13	47.9	47.9	47.9	28.182	0	67.284	321030000	45	0.361962	0.577356	-0.352724	-0.696343	WP_029059456.1	WP_029059456.1	6481
22.3667	19.4842	22.7324	22.7134	22.6718	22.4612						18	18	18	53.5	53.5	53.5	36.713	0	41.231	622240000	40	0.455192	0.423312	-1.08769	-0.962406	WP_029059459.1	WP_029059459.1	6484
22.1586	22.1884	21.9413	20.8168	22.4807	21.613						26	26	26	61.6	61.6	61.6	52.257	0	134.96	505640000	71	0.399185	0.532052	0.459263	0.782693	WP_029059461.1	WP_029059461.1	6485
22.3308	20.1881	20.8811	21.2147	21.0507	21.109						27	27	27	63.3	63.3	63.3	51.414	0	69.062	249750000	58	0.00440969	0.995526	0.00852776	0.0116328	WP_029059464.1	WP_029059464.1	6486
18.8253	19.6819	19.3589	19.9912	20.4043	20.07						9	9	9	37.9	37.9	37.9	34.959	0	30.466	146960000	22	1.4386	0.113551	-0.866428	-2.27998	WP_029059465.1	WP_029059465.1	6487
19.1564	22.9292	18.6507	20.3067	21.8995	22.4138						12	12	12	43.3	43.3	43.3	31.669	0	5.504	670110000	23	0.362151	0.507812	-1.29457	-0.813475	WP_029059467.1	WP_029059467.1	6489
24.1601	24.451	24.2506	24.459	24.2521	24.257						28	28	28	94.3	94.3	94.3	36.25	0	154.28	2136300000	122	0.117436	0.895571	-0.0354074	-0.168837	WP_029059469.1	WP_029059469.1	6491
20.9538	19.5144	21.5064	21.1366	21.9463	21.3438						24	24	24	56.9	56.9	56.9	41.212	0	32.49	307480000	61	0.566097	0.359888	-0.817368	-1.10237	WP_029059470.1	WP_029059470.1	6492
19.7189	19.082	18.8988	19.4917	21.1152	21.7187						8	8	8	81.5	81.5	81.5	15.439	0	70.542	232980000	18	1.01964	0.139788	-1.54197	-1.90395	WP_029059471.1	WP_029059471.1	6493
25.6012	23.346	26.2699	19.1585	17.7209	17.6275				+	2AEP P_Pi	39	39	39	84.3	84.3	84.3	44.12	0	266.79	609930000	153	2.61424	0.0401481	6.90337	6.19788	WP_029059472.1	WP_029059472.1	6494
23.9358	24.1399	24.4812	19.7601	19.208	18.701				+	2AEP P_Pi	24	24	24	73.5	73.5	73.5	30.016	0	117.9	238780000	67	3.86857	0	4.96261	11.1585	WP_029059473.1	WP_029059473.1	6495
26.9311	26.649	28.054	19.423	20.7332	21.5906				+	2AEP P_Pi	36	36	36	72.7	72.7	72.7	47.905	0	275.66	2187300000	262	3.01609	0.0411429	6.62912	7.68598	WP_029059474.1	WP_029059474.1	6496
24.4303	24.2911	24.6652	18.832	18.534	18.4122				+	2AEP P_Pi	19	19	19	79.6	79.6	79.6	30.615	0	73.834	247950000	62	5.42099	0	5.86943	22.0884	WP_029059477.1	WP_029059477.1	6498
24.5326	24.4422	25.1457	19.0945	18.6505	19.2989				+	2AEP P_Pi	51	51	51	70.2	70.2	70.2	74.105	0	172.11	414350000	144	4.3869	0	5.69217	14.5076	WP_029059478.1	WP_029059478.1	6499
19.427	19.059	20.1102	21.2199	22.3079	22.1259						38	38	38	60.4	60.4	60.4	70.36	0	126.61	452770000	70	2.17331	0.0697857	-2.35251	-4.23013	WP_029059479.1	WP_029059479.1	6500
19.6389	19.9332	18.99	20.291	21.0902	21.3766						21	21	21	31.5	31.5	31.5	124.83	0.93291	-3.1219	218010000	29	1.51075	0.105416	-1.39857	-2.64895	WP_029059481.1	WP_029059481.1	6501
22.6957	22.951	23.313	23.222	23.2108	22.9619						31	31	31	29	29	29	95.686	0	56.297	738140000	98	0.296806	0.693688	-0.145021	-0.486346	WP_029059482.1	WP_029059482.1	6502
28.0058	27.9388	29.0518	27.2127	27.6094	27.4338						28	28	28	59.3	59.3	59.3	39.888	0	323.31	19793000000	434	1.13602	0.138738	0.913523	1.91042	WP_029059484.1	WP_029059484.1	6503
20.0604	19.9388	20.0355	20.0708	20.2309	20.2698						8	8	8	33.6	33.6	33.6	27.372	0	24.456	101810000	28	1.17981	0.384595	-0.178925	-1.0445	WP_029059485.1	WP_029059485.1	6504
20.7371	20.3675	20.5346	20.9594	20.9105	21.0158						12	12	12	48.4	48.4	48.4	23.778	0	13.632	156440000	25	1.69612	0.126867	-0.41548	-1.96808	WP_029059487.1	WP_029059487.1	6506
20.3237	20.473	19.345	19.8302	20.1418	20.3102						16	16	16	72.8	72.8	72.8	33.995	0	76.1	95938000	26	0.0419054	0.93209	-0.0468318	-0.0974327	WP_029059493.1	WP_029059493.1	6510
23.4756	23.4372	23.4325	23.7996	22.8264	23.6747						22	22	22	58	58	58	39.785	0	85.593	714670000	54	0.0161205	0.982437	0.0148741	0.0366359	WP_029059494.1	WP_029059494.1	6511
23.3894	23.1565	23.1016	23.561	23.3719	23.3778						28	28	28	68.9	68.9	68.9	34.322	0	69.23	1131900000	115	0.959373	0.377879	-0.221073	-1.06342	WP_029059497.1	WP_029059497.1	6514
22.0248	21.5239	21.184	19.6414	20.9104	21.12						18	18	18	86	86	86	17.35	0	37.17	186320000	49	0.911656	0.197298	1.0203	1.63911	WP_029059500.1	WP_029059500.1	6516
21.0485	20.5889	20.9509	20.8184	20.3967	20.3012						11	11	11	57	57	57	21.843	0	16.72	74007000	35	0.778422	0.337796	0.357387	1.14678	WP_029059502.1	WP_029059502.1	6518
24.4828	24.307	24.9219	24.2423	24.6058	24.2893						34	34	34	69	69	69	51.171	0	195.62	2000900000	167	0.372011	0.634326	0.191449	0.606729	WP_029059503.1	WP_029059503.1	6519
19.5281	20.3573	19.925	19.9138	19.2937	19.3645						11	11	11	54.9	54.9	54.9	28.879	0	6.5165	57287000	16	0.596855	0.40249	0.412825	1.00835	WP_029059506.1	WP_029059506.1	6520
21.7916	21.8759	22.4662	20.9574	21.5761	21.4361						12	12	12	42.7	42.7	42.7	36.052	0	21.028	264720000	43	1.19791	0.14086	0.721396	1.88326	WP_029059507.1	WP_029059507.1	6521
23.0755	21.8211	22.7597	23.64	23.5517	23.5731						16	16	16	45.7	45.7	45.7	41.912	0	36.034	1254500000	58	1.28655	0.118015	-1.03616	-2.16944	WP_029059512.1	WP_029059512.1	6523
26.4311	26.126	26.6649	25.2842	25.3589	25.3804						48	48	48	73.6	73.6	73.6	58.83	0	237.12	4143700000	216	2.59199	0.071322	1.06614	4.12055	WP_029059513.1	WP_029059513.1	6524
19.8817	19.6275	20.1196	19.5553	19.0321	19.9308						14	14	14	62.8	62.8	62.8	35.508	0	22.459	75938000	25	0.552288	0.436195	0.370197	0.932911	WP_029059516.1	WP_029059516.1	6527
21.7787	18.6461	21.8454	18.9908	21.4497	21.1071						13	13	13	69.7	69.7	69.7	26.195	0	62.893	282750000	30	0.0641785	0.894387	0.240887	0.171343	WP_029059523.1	WP_029059523.1	6532
20.2325	19.6064	18.9321	19.9245	20.712	21.0096						23	23	23	52.7	52.7	52.7	51.318	0	11.62	137520000	32	0.901868	0.203427	-0.958362	-1.6087	WP_029059526.1	WP_029059526.1	6535
21.0654	21.0455	21.3334	21.739	21.6792	21.6621						25	25	25	54	54	54	67.65	0	78.378	367500000	62	2.32896	0.10327	-0.545324	-2.7864	WP_029059527.1	WP_029059527.1	6536
20.4375	19.8351	20.9363	18.3512	21.3849	20.9666						6	6	6	23.6	23.6	23.6	38.92	0.00054675	3.0609	247880000	21	0.0583178	0.90478	0.168731	0.153227	WP_029059528.1	WP_029059528.1	6537
19.6545	19.8496	19.9245	20.0734	16.6118	17.0502						3	3	3	9	9	9	28.905	0.59084	-0.67292	8318800	6	0.804153	0.203624	1.89774	1.59321	WP_029059546.1	WP_029059546.1	6549
18.9944	20.0317	19.5314	18.7229	20.0219	19.3669						10	10	10	24.3	24.3	24.3	37.318	0	16.375	76457000	16	0.112193	0.845033	0.148572	0.256196	WP_029059564.1	WP_029059564.1	6566
21.3393	19.8338	21.281	19.2613	21.8715	21.4784						17	17	16	39.5	39.5	37.7	52.239	0	17.171	156210000	29	0.0183195	0.969775	-0.0523561	-0.04986	WP_029059566.1	WP_029059566.1	6567
20.149	19.291	20.3854	20.0461	20.0381	20.249						18	18	18	48.3	48.3	48.3	45.056	0	40.289	82345000	45	0.19083	0.762699	-0.169217	-0.384948	WP_029059577.1	WP_029059577.1	6576
24.4769	24.5852	24.8594	21.1183	23.477	24.6633						11	11	11	38.3	38.3	38.3	37.011	0	21.599	1511500000	43	0.673199	0.263478	1.55426	1.3538	WP_029059578.1	WP_029059578.1	6577
21.5231	21.3988	21.3269	19.2139	21.0445	20.7386						27	27	27	74.6	74.6	74.6	47.119	0	38.912	194530000	63	0.887724	0.200277	1.08397	1.6202	WP_029059579.1	WP_029059579.1	6578
17.6745	19.559	22.2594	19.3333	21.3194	22.0445						19	19	19	49.8	49.8	49.8	48.155	0	31.446	300320000	36	0.275206	0.610098	-1.06808	-0.644251	WP_029059580.1	WP_029059580.1	6579
19.1179	19.9869	18.4769	19.9052	20.4555	20.3896						23	23	23	56.2	56.2	56.2	57.844	0	12	110530000	33	1.05437	0.146031	-1.05622	-1.85076	WP_029059587.1	WP_029059587.1	6585
23.7343	23.4004	23.652	23.7961	23.8296	24.0603						29	29	29	95.5	95.5	95.5	24.301	0	125.08	1055000000	85	1.08146	0.278798	-0.29977	-1.3016	WP_029059591.1	WP_029059591.1	6588
26.1149	26.2116	26.3556	27.4546	27.5104	27.2895				+	2AEP P_Pi	39	39	39	60.3	60.3	60.3	58.943	0	257.69	16184000000	289	3.60766	0.0392	-1.19082	-6.06323	WP_029059594.1	WP_029059594.1	6590
22.4453	23.1288	23.1014	19.2642	22.2406	22.1783						21	21	21	59.4	59.4	59.4	41.96	0	74.058	444280000	65	0.76002	0.22541	1.66411	1.50324	WP_029059595.1	WP_029059595.1	6591
20.5595	19.3999	21.112	18.9458	19.6495	19.7909						10	10	10	41.9	41.9	41.9	34.717	0	38.653	91771000	18	0.7206	0.266377	0.8951	1.33963	WP_029059597.1	WP_029059597.1	6592
18.7747	20.7543	18.1396	19.5745	22.6291	22.4778						15	15	15	53.4	53.4	53.4	33.131	0	6.7571	348590000	22	0.856881	0.179654	-2.33761	-1.70874	WP_029059610.1	WP_029059610.1	6601
21.7278	21.5403	21.7083	21.0391	21.5253	21.8941						11	11	11	53.1	53.1	53.1	26.602	0	62.654	275760000	47	0.271609	0.694019	0.172616	0.486725	WP_029059611.1	WP_029059611.1	6602
22.6206	22.1357	22.0949	22.2966	22.4736	22.3812						11	11	11	95.7	95.7	95.7	14.562	0	42.617	553980000	63	0.221218	0.777912	-0.100063	-0.362018	WP_029059624.1	WP_029059624.1	6612
21.3478	19.6213	19.9117	19.0096	21.7188	21.5134						25	25	25	44.1	44.1	44.1	66.523	0	90.947	217760000	35	0.167555	0.753136	-0.453663	-0.40455	WP_029059627.1	WP_029059627.1	6615
19.5637	19.1296	18.2043	20.212	19.6724	19.7462						15	15	15	39.1	39.1	39.1	49.858	0	12.352	93015000	29	0.981594	0.182413	-0.910992	-1.7028	WP_029059632.1	WP_029059632.1	6620
21.5649	21.3281	21.6799	19.8361	21.1408	21.0899						10	10	10	40.4	40.4	40.4	29.868	0	26.861	209370000	35	0.886575	0.211243	0.835386	1.54968	WP_029059640.1	WP_029059640.1	6625
20.756	20.0356	19.1029	18.8195	21.4342	21.0924						16	16	16	50	50	50	45.657	0	30.516	223210000	38	0.195661	0.710914	-0.483856	-0.460872	WP_029059644.1	WP_029059644.1	6627
23.8696	23.0868	23.8668	23.6609	24.042	24.0792						34	34	34	74.5	74.5	74.5	54.322	0	118.33	1161300000	131	0.4733	0.507847	-0.319652	-0.813821	WP_029059645.1	WP_029059645.1	6628
20.3901	19.937	20.3538	19.6585	19.9971	19.9368						12	12	12	71.1	71.1	71.1	29.038	0	16.103	125540000	34	0.94905	0.278703	0.362811	1.30093	WP_029059648.1	WP_029059648.1	6629
23.0304	22.8705	23.4599	25.191	25.7219	25.634				+	2AEP P_Pi	29	29	29	74.5	74.5	74.5	34.913	0	254.55	4867400000	179	3.24181	0.0288	-2.39537	-7.02982	WP_029059651.1	WP_029059651.1	6630
23.0628	22.7978	23.4935	23.5852	23.6749	23.6147						36	36	36	82.4	82.4	82.4	47.88	0	95.956	1406200000	87	1.1659	0.190526	-0.506884	-1.66502	WP_029059652.1	WP_029059652.1	6631
22.7921	21.501	23.3758	22.3438	23.6871	23.4401						96	96	96	50.9	50.9	50.9	267.23	0	259.97	1103700000	214	0.362922	0.54215	-0.600734	-0.759639	WP_029059653.1	WP_029059653.1	6632
22.5004	22.4738	22.4407	22.5742	22.4784	22.2712						22	22	22	62.8	62.8	62.8	40.792	0	56.84	484980000	66	0.121748	0.903507	0.0303656	0.158932	WP_029059656.1	WP_029059656.1	6633
23.7971	23.3423	24.3128	23.5898	23.8728	23.9921						38	38	38	78.1	78.1	78.1	51.355	0	269.35	1638100000	145	0.000888624	0.999179	-0.000830332	-0.0020519	WP_029059660.1	WP_029059660.1	6636
19.4995	20.1141	19.4407	19.8291	19.9912	20.0806						7	7	7	23.2	23.2	23.2	35.533	0	37.682	86044000	15	0.548688	0.479777	-0.282199	-0.861547	WP_029059666.1	WP_029059666.1	6642
19.2252	19.4232	18.9625	19.117	20.9615	21.4801						13	13	13	69	69	69	23.198	0	49.165	242470000	22	0.836985	0.207558	-1.31584	-1.58653	WP_029059671.1	WP_029059671.1	6645
20.5104	20.7716	21.0556	19.2166	20.3409	20.5748						19	19	19	48.9	48.9	48.9	39.364	0	19.582	161650000	36	0.754365	0.265782	0.735064	1.34181	WP_029059673.1	WP_029059673.1	6647
22.9658	22.37	22.2061	22.033	23.3317	23.4326						11	11	11	97.7	97.7	97.7	14.713	0	41.08	1007000000	77	0.342016	0.581372	-0.418484	-0.690187	WP_029059675.1	WP_029059675.1	6649
18.6478	20.1042	18.969	20.3026	21.0055	20.6969						16	16	16	42.2	42.2	42.2	46.187	0	61.523	174270000	34	1.37114	0.106592	-1.42804	-2.43552	WP_029059676.1	WP_029059676.1	6650
21.9552	18.819	21.7987	21.3979	21.4191	21.768						8	8	8	79.2	79.2	79.2	17.252	0	50.389	334630000	39	0.260034	0.642439	-0.670666	-0.594903	WP_029059678.1	WP_029059678.1	6652
21.7529	20.23	18.6412	21.6626	21.1258	21.4891						8	8	8	65.5	65.5	65.5	24.152	0	47.608	265140000	26	0.597266	0.317946	-1.21779	-1.20315	WP_029059680.1	WP_029059680.1	6653
27.0732	26.8425	26.8425	26.2627	26.8803	26.8772						30	30	30	77.2	77.2	77.2	29.607	0	323.31	10072000000	322	0.488521	0.537624	0.246004	0.770511	WP_029059686.1	WP_029059686.1	6657
23.7096	23.7552	23.3949	23.2393	23.5458	23.6689						21	21	21	84.4	84.4	84.4	28.236	0	83.59	1164600000	109	0.325505	0.689063	0.135239	0.499546	WP_029059687.1	WP_029059687.1	6658
19.9603	20.1387	20.0649	20.0046	21.8211	20.779						25	25	25	69.9	69.9	69.9	46.946	0	50.043	278190000	40	0.701698	0.28113	-0.813595	-1.29386	WP_029059691.1	WP_029059691.1	6661
24.5921	24.1781	24.5535	24.645	24.5702	24.5492						22	22	22	79.8	79.8	79.8	36.875	0	94.167	2300100000	137	0.470812	0.621245	-0.146955	-0.624778	WP_029059695.1	WP_029059695.1	6665
22.2075	22.3285	22.5296	22.2228	22.3953	22.0973						15	15	15	68.1	68.1	68.1	25.879	0	118.94	355390000	67	0.385005	0.682708	0.116737	0.512856	WP_029059697.1	WP_029059697.1	6666
22.6647	22.7196	22.6162	22.808	22.7711	22.7506						20	20	20	65.7	65.7	65.7	29.606	0	62.001	829700000	80	1.4835	0.505738	-0.10973	-0.817218	WP_029059698.1	WP_029059698.1	6667
23.6277	23.4664	23.5271	23.8158	24.0139	23.8657						42	42	42	71.8	71.8	71.8	59.526	0	106.37	1774200000	145	2.03797	0.120241	-0.358096	-2.03641	WP_029059699.1	WP_029059699.1	6668
27.0622	26.7451	27.0628	27.6546	28.0165	27.9201						50	50	50	80.4	80.4	80.4	57.009	0	323.31	22820000000	579	2.40933	0.0694	-0.907041	-3.60909	WP_029059709.1	WP_029059709.1	6675
21.9044	21.8131	21.6039	22.2001	22.467	22.3344						13	13	13	60.5	60.5	60.5	21.947	0	26.324	489770000	49	2.05008	0.108539	-0.56004	-2.5728	WP_029059710.1	WP_029059710.1	6676
21.3112	20.9253	20.2302	21.2405	21.5313	21.0659						7	7	7	46.7	46.7	46.7	22.378	0	51.886	278640000	33	0.593514	0.393141	-0.456976	-1.02881	WP_029059711.1	WP_029059711.1	6677
23.5914	23.4535	24.0119	22.1688	22.6037	22.7092						28	28	27	95.1	95.1	95.1	40.269	0	126.65	570850000	118	2.14261	0.0694762	1.1917	3.54987	WP_029059716.1	WP_029059716.1	6681
26.477	26.4209	26.8248	25.0914	25.3673	25.4357						27	27	27	66.1	66.1	66.1	40.542	0	270.06	5057400000	204	2.82811	0.0664762	1.27612	4.82597	WP_029059717.1	WP_029059717.1	6682
22.5238	22.3973	23.1312	23.1931	23.1876	22.9618						43	43	43	67.6	67.6	67.6	77.727	0	144.82	1163600000	126	0.834648	0.29169	-0.430034	-1.2686	WP_029059724.1	WP_029059724.1	6689
22.7802	21.5233	22.7964	23.5271	23.2973	23.5507						44	44	44	68.3	68.3	68.3	72.24	0	116.73	1312400000	137	1.19518	0.120502	-1.09171	-2.06233	WP_029059725.1	WP_029059725.1	6690
22.2504	22.1162	22.3939	22.6828	22.6526	22.4303						24	24	24	60.6	60.6	60.6	55.782	0	89.052	642840000	80	1.38363	0.2102	-0.335068	-1.57309	WP_029059726.1	WP_029059726.1	6691
22.6096	22.9074	22.9362	22.6632	22.606	22.5791						22	22	22	63	63	63	40.847	0	105.68	787750000	88	0.875069	0.418135	0.201678	0.972908	WP_029059733.1	WP_029059733.1	6697
22.0924	21.711	22.1737	22.2049	22.5886	22.6406						25	25	25	62.7	62.7	62.7	53.296	0	161.79	647550000	67	1.15332	0.199316	-0.485652	-1.62959	WP_029059734.1	WP_029059734.1	6698
23.7834	23.3488	23.6443	23.7603	23.8906	23.895						26	26	26	60.5	60.5	60.5	53.988	0	122.29	1564400000	107	0.881517	0.367096	-0.256495	-1.08901	WP_029059745.1	WP_029059745.1	6706
22.7366	22.5829	22.4504	19.3002	23.2964	23.5581						9	9	9	34.4	34.4	34.4	35.506	0	42.627	954020000	32	0.144862	0.778212	0.538379	0.36371	WP_029059748.1	WP_029059748.1	6709
19.756	20.4172	19.4594	24.2676	23.7911	22.8822				+	2AEP P_Pi	7	7	7	80.5	80.5	80.5	24.367	0.00055835	3.552	905680000	17	2.79607	0.0336667	-3.76946	-6.33257	WP_029059754.1	WP_029059754.1	6713
19.0187	19.0598	20.3104	20.527	21.9959	21.1471						27	27	27	73.7	73.7	73.7	44.585	0	119.22	303440000	60	1.36844	0.107604	-1.76033	-2.51195	WP_029059755.1	WP_029059755.1	6714
21.8432	20.0754	22.1416	22.9839	23.1267	23.2737						43	43	43	60.2	60.2	60.2	79.919	0	105.58	875270000	91	1.28012	0.109929	-1.77472	-2.36572	WP_029059763.1	WP_029059763.1	6719
24.8019	23.078	24.4687	21.4458	22.4227	22.3874						35	35	35	61.9	61.9	61.9	65.697	0	87.971	532560000	86	1.51978	0.100515	2.0309	2.83135	WP_029059772.1	WP_029059772.1	6724
23.4179	23.6016	23.6027	21.5547	22.7373	23.163						21	21	21	62.6	62.6	62.6	41.518	0	56.212	780050000	100	1.02181	0.158137	1.05574	1.80458	WP_029059781.1	WP_029059781.1	6727
24.3965	24.1932	24.2168	23.6353	23.4311	23.762						16	16	16	63.9	63.9	63.9	26.153	0	205.46	1110000000	101	2.3276	0.0861593	0.659347	3.05506	WP_029059783.1	WP_029059783.1	6729
19.8106	19.5488	19.3344	19.9088	20.2755	20.0092						12	12	12	52.2	52.2	52.2	29.793	0	22.37	152730000	26	1.33023	0.154609	-0.499877	-1.81209	WP_029059785.1	WP_029059785.1	6731
18.8149	19.5478	18.6419	18.7514	18.9918	19.1206						11	11	11	70.4	70.4	70.4	16.634	0	25.473	74361000	32	0.0542958	0.92082	0.0469367	0.11793	WP_029059786.1	WP_029059786.1	6732
19.0624	19.7712	18.6288	19.7055	21.8136	22.0692						18	18	18	41.2	41.2	41.2	45.123	0.0005531	3.4131	336830000	24	1.17144	0.115166	-2.042	-2.22047	WP_029059788.1	WP_029059788.1	6734
21.0495	20.5795	21.1594	21.4735	21.1181	21.2751						24	24	24	72.5	72.5	72.5	44.931	0	17.112	188150000	46	0.809676	0.32903	-0.35948	-1.17706	WP_029059789.1	WP_029059789.1	6735
20.4102	20.2849	18.9933	19.9643	20.124	19.6485						13	13	13	64.6	64.6	64.6	41.715	0	10.252	90325000	16	0.0112299	0.985911	-0.0161336	-0.0281116	WP_029059791.1	WP_029059791.1	6737
21.6425	20.7067	21.5656	20.6438	18.4638	21.6833						7	7	7	74.5	74.5	74.5	21.636	0	29.543	162150000	12	0.450541	0.42882	1.04125	0.950982	WP_029059793.1	WP_029059793.1	6739
22.0378	22.3266	22.3301	22.4142	22.4824	22.158						28	28	28	50.9	50.9	50.9	68.496	0	53.428	584950000	75	0.361984	0.686378	-0.120008	-0.50358	WP_029059797.1	WP_029059797.1	6742
20.0088	20.3192	21.2982	21.1898	22.6822	22.7997						53	53	53	71.7	71.7	71.7	97.345	0	132.05	570420000	121	1.22003	0.114206	-1.68186	-2.24947	WP_029059799.1	WP_029059799.1	6743
20.585	20.2879	21.0277	21.0757	21.0988	20.7997						18	18	18	47.4	47.4	47.4	40.515	0	153.19	260130000	48	0.692246	0.377131	-0.357897	-1.06694	WP_029059810.1	WP_029059810.1	6750
19.0892	19.7318	19.6932	19.4023	20.1525	19.9089						24	24	24	48.1	48.1	48.1	71.778	0	23.315	85339000	27	0.448638	0.531547	-0.316475	-0.784337	WP_029059830.1	WP_029059830.1	6766
19.6094	18.2508	18.6927	20.3388	20.0189	20.2523						10	10	10	45.9	45.9	45.9	25.319	0	37.84	103880000	24	1.51876	0.107062	-1.35237	-2.64464	WP_029059831.1	WP_029059831.1	6767
19.9648	18.8479	20.0539	19.0938	20.738	20.691						5	5	5	12.9	12.9	12.9	51.983	0	45.666	173650000	27	0.343623	0.562287	-0.55206	-0.721389	WP_029059838.1	WP_029059838.1	6769
24.4819	24.226	24.1142	23.3577	24.0859	24.4745						12	12	12	61.6	61.6	61.6	15.395	0	91.805	1830300000	130	0.364791	0.587683	0.301285	0.677133	WP_029059848.1	WP_029059848.1	6775
19.9846	20.0803	19.3732	18.9098	20.5114	20.6193						4	4	4	6.6	6.6	6.6	54.892	0	14.971	137350000	13	0.123287	0.827679	-0.200838	-0.288787	WP_029059852.1	WP_029059852.1	6779
19.4487	19.5156	19.9327	20.3495	20.1417	19.8689						10	10	10	13.3	13.3	13.3	84.503	0	11.566	122940000	27	1.1152	0.203598	-0.487686	-1.59557	WP_029059855.1	WP_029059855.1	6781
18.6268	20.1717	18.6611	22.2185	22.6167	22.5691						48	48	48	49	49	49	112.17	0	40.751	577890000	64	2.49368	0.055	-3.3149	-5.30729	WP_029059857.1	WP_029059857.1	6783
19.9063	20.6092	22.8141	20.1544	22.822	22.6073						27	27	27	36.1	36.1	36.1	77.375	0	22.299	657740000	38	0.24209	0.659881	-0.751328	-0.567243	WP_029059862.1	WP_029059862.1	6787
25.088	24.6206	24.8074	24.5616	24.6919	24.8221						9	9	9	53.3	53.3	53.3	22.174	0	194.42	2909500000	93	0.400217	0.65439	0.146802	0.575126	WP_029059868.1	WP_029059868.1	6789
25.0809	24.6908	24.4703	23.9438	24.0811	24.125						13	13	13	91.1	91.1	91.1	14.867	0	249.42	1726800000	81	1.69462	0.1056	0.697381	2.4325	WP_029059869.1	WP_029059869.1	6790
21.1172	20.5449	20.5	21.778	21.9219	21.7094						30	30	30	53.8	53.8	53.8	57.275	0	116.19	397980000	71	2.18475	0.0695632	-1.08237	-3.51058	WP_029059871.1	WP_029059871.1	6792
24.0357	23.6947	23.9611	24.3502	24.6444	24.5556						31	31	31	65.9	65.9	65.9	50.454	0	118.14	2639900000	157	1.99169	0.109261	-0.61953	-2.63287	WP_029059873.1	WP_029059873.1	6793
20.9459	21.1917	21.1411	18.3571	20.8949	20.6889						6	6	6	38.3	38.3	38.3	20.847	0	21.52	174020000	25	0.610775	0.314189	1.11256	1.21296	WP_029059874.1	WP_029059874.1	6794
21.4763	20.8879	21.4577	19.6149	22.0184	21.3826						14	14	14	62.8	62.8	62.8	25.338	0	27.366	347570000	37	0.132853	0.809522	0.268654	0.318127	WP_029059875.1	WP_029059875.1	6795
22.1808	21.7717	22.1649	21.6637	21.8269	21.8046						18	18	18	71.6	71.6	71.6	31.368	0	83.605	390520000	71	0.892312	0.34573	0.274125	1.12709	WP_029059876.1	WP_029059876.1	6796
24.6208	24.5098	24.341	24.3658	24.5915	24.6013						22	22	22	87.1	87.1	87.1	25.328	0	181.47	2372900000	160	0.0923875	0.91123	-0.0290044	-0.136839	WP_029059879.1	WP_029059879.1	6798
18.7128	18.8535	17.7146	19.8531	20.3669	20.1607						15	15	15	41.9	41.9	41.9	35.796	0	16.189	111740000	22	1.92452	0.0704719	-1.69988	-3.48105	WP_029059882.1	WP_029059882.1	6800
22.3178	22.3169	22.3577	22.1717	22.2671	21.7357						31	31	30	66.5	66.5	65.3	54.75	0	37.276	442700000	70	0.764444	0.392208	0.272617	1.03221	WP_029059892.1	WP_029059892.1	6808
22.013	20.7331	21.6197	19.5691	21.5461	21.693						34	34	34	50.4	50.4	50.4	100.97	0.18241	0.33808	300130000	44	0.264984	0.644598	0.519196	0.588353	WP_029059898.1	WP_029059898.1	6812
22.9526	23.0072	23.1707	22.0993	22.1641	22.5399						34	34	34	60.9	60.9	60.9	51.178	0	237.17	450390000	110	2.15542	0.0854775	0.775717	3.07633	WP_029059899.1	WP_029059899.1	6813
22.0052	20.8853	21.9552	20.251	21.9715	22.3294						33	33	33	60.4	60.4	60.4	54.63	0	107.21	398670000	80	0.0453364	0.921488	0.0979284	0.116828	WP_029059950.1	WP_029059950.1	6851
19.4472	20.5189	19.3909	19.4296	20.8259	20.3561						21	21	21	54.6	54.6	54.6	50.347	0	6.8352	163500000	27	0.310055	0.610642	-0.418171	-0.64294	WP_029059951.1	WP_029059951.1	6852
24.0682	23.8074	24.2412	22.4562	22.7616	23.1072						37	37	37	71.9	71.9	71.9	58.083	0	202.62	792600000	159	2.29685	0.0746667	1.26395	3.87234	WP_029059958.1	WP_029059958.1	6856
24.0279	23.4686	22.9597	23.1458	23.5077	23.4575						21	21	21	58.6	58.6	58.6	60.885	0	64.958	1157900000	62	0.128521	0.838343	0.115078	0.268503	WP_029059968.1	WP_029059968.1	6862
23.4809	23.2864	23.6791	24.0719	23.7774	23.7201						21	21	21	51.8	51.8	51.8	56.515	0	57.427	1249000000	92	1.11968	0.239844	-0.37433	-1.45529	WP_029059974.1	WP_029059974.1	6868
20.0128	19.1204	20.247	18.2003	19.8014	19.9833						12	12	12	61.2	61.2	61.2	27.902	0	16.32	63648000	28	0.282941	0.630927	0.465079	0.610086	WP_029059975.1	WP_029059975.1	6869
22.8209	20.2999	23.1295	19.8132	22.7086	22.0107						8	8	8	49.1	49.1	49.1	18.501	0	6.9968	143300000	15	0.173383	0.736649	0.57261	0.423939	WP_029059979.1	WP_029059979.1	6872
21.3535	22.1778	20.8941	20.9543	22.0685	21.2412						17	17	17	52	52	52	45.348	0	121.32	373900000	45	0.0362339	0.938234	0.0537675	0.0892285	WP_029059980.1	WP_029059980.1	6873
20.8113	20.9455	20.8734	19.06	20.4515	20.9552						8	8	8	60.7	60.7	60.7	15.804	0	62.927	170180000	19	0.563643	0.372006	0.721132	1.07941	WP_029059981.1	WP_029059981.1	6874
19.9611	18.8108	20.4397	19.8239	19.9296	20.359						17	17	17	48.8	48.8	48.8	39.872	0	38.165	84107000	31	0.230724	0.692646	-0.300279	-0.492017	WP_029059991.1	WP_029059991.1	6880
24.4853	24.0346	24.7004	22.8214	23.5955	23.716						28	28	28	81.6	81.6	81.6	38.985	0	189.85	1174800000	104	1.40217	0.110809	1.02918	2.32792	WP_029059992.1	WP_029059992.1	6881
21.4095	19.5737	20.9809	21.147	21.7177	22.4612						19	19	19	48.2	48.2	48.2	52.723	0	30.624	438810000	30	0.767135	0.241699	-1.12064	-1.45073	WP_029059995.1	WP_029059995.1	6884
18.5069	19.5574	19.2087	19.8191	21.0279	21.0413						15	15	15	41	41	41	47.578	0.83431	-1.7395	166000000	17	1.40688	0.105864	-1.53841	-2.52403	WP_029059997.1	WP_029059997.1	6886
22.3316	22.2801	23.1885	21.4024	21.9102	21.957						14	14	14	59.4	59.4	59.4	33.515	0	34.059	309970000	39	1.15321	0.139956	0.843524	1.89993	WP_029060001.1	WP_029060001.1	6889
27.7101	27.486	27.3687	26.4271	27.2626	27.1241						13	13	13	50.5	50.5	50.5	34.365	0	235.39	15512000000	362	0.987045	0.211087	0.583695	1.54727	WP_029060005.1	WP_029060005.1	6892
18.8894	20.524	18.276	21.6145	19.1678	19.1003						18	18	18	50.2	50.2	50.2	49.775	0.00054735	3.0891	62620000	19	0.27559	0.620414	-0.731025	-0.627508	WP_029060006.1	WP_029060006.1	6893
19.3562	19.9251	18.8734	19.4021	20.7029	19.2845						5	5	5	15.6	15.6	15.6	36.421	0.00055463	3.4623	109610000	11	0.306784	0.612784	-0.411592	-0.636443	WP_029060015.1	WP_029060015.1	6898
20.0051	19.1177	20.1348	19.3368	19.5173	19.4993						14	14	14	59.5	59.5	59.5	25.093	0	7.4894	52069000	24	0.391584	0.570728	0.301394	0.70958	WP_029060024.1	WP_029060024.1	6901
22.4703	22.5111	22.5214	22.6347	22.8546	22.649						33	33	33	84.2	84.2	84.2	35.576	0	164.2	795530000	129	1.36092	0.308393	-0.211862	-1.2265	WP_029060026.1	WP_029060026.1	6903
19.6333	22.0051	21.93	19.3901	18.6731	18.4452						14	14	14	97.5	97.5	97.5	27.54	0.0005767	4.3682	27750000	21	1.32886	0.107553	2.3533	2.53368	WP_029060041.1	WP_029060041.1	6913
19.9655	20.5737	19.81	18.7722	19.8909	19.7563						11	11	11	41.1	41.1	41.1	21.964	0	38.41	92609000	28	0.69317	0.306031	0.643246	1.23071	WP_029060045.1	WP_029060045.1	6917
19.0078	18.9745	19.1828	19.5714	18.4093	19.2067						15	15	15	37.9	37.9	37.9	42.897	0	78.163	33007000	30	0.00698525	0.992357	-0.00742912	-0.0165393	WP_029060046.1	WP_029060046.1	6918
22.7325	22.3414	22.7259	22.2444	22.852	22.7456						21	21	21	65.9	65.9	65.9	31.866	0	118.54	749100000	98	0.0206253	0.975775	-0.0140883	-0.0430006	WP_029060058.1	WP_029060058.1	6928
21.5345	18.601	22.3955	22.2384	21.8519	21.3975						22	22	22	48.2	48.2	48.2	64.098	0	96.62	463630000	57	0.348325	0.535263	-0.985605	-0.773648	WP_029060068.1	WP_029060068.1	6937
21.007	20.8135	20.9533	20.7584	21.0385	20.8316						12	12	12	36.8	36.8	36.8	42.206	0	20.67	254740000	39	0.181277	0.85335	0.0484619	0.240195	WP_029060070.1	WP_029060070.1	6938
20.5821	20.4435	21.5032	21.0939	21.2726	21.1629						38	38	38	55.2	55.2	55.2	80.58	0	54.185	297020000	81	0.422685	0.541319	-0.333518	-0.763904	WP_029060073.1	WP_029060073.1	6941
21.7221	21.5685	19.0373	18.9914	18.3802	19.4383						6	6	6	32.7	32.7	32.7	32.059	0.46132	-0.33846	36158000	11	0.931612	0.158922	1.83933	1.79813	WP_029060076.1	WP_029060076.1	6943
25.0377	24.5974	25.4941	25.2116	25.4828	25.2456						19	19	19	72.8	72.8	72.8	27.32	0	177.11	3808000000	126	0.423015	0.56054	-0.270251	-0.725382	WP_029060078.1	WP_029060078.1	6945
19.5657	19.0124	21.0168	21.3736	21.4235	21.136						11	11	11	48.8	48.8	48.8	36.972	0	18.386	256030000	21	1.12556	0.120353	-1.44605	-2.05349	WP_029060081.1	WP_029060081.1	6946
23.3195	23.2637	23.2055	23.2302	24.1202	23.7123						15	15	15	47.3	47.3	47.3	33.676	0	95.9	1676900000	83	0.75247	0.32721	-0.424686	-1.18194	WP_029060083.1	WP_029060083.1	6947
20.2836	21.0641	20.1786	20.7681	20.907	20.7688						19	19	19	45	45	45	51.386	0	26.893	165260000	37	0.467473	0.520741	-0.30582	-0.798265	WP_029060086.1	WP_029060086.1	6950
23.2637	23.372	23.6689	23.9521	23.9847	23.9439						35	35	35	72.7	72.7	72.7	61.426	0	123.16	1872400000	157	1.90291	0.109865	-0.525331	-2.36881	WP_029060092.1	WP_029060092.1	6955
21.1755	19.9505	21.3152	18.8305	21.5727	21.1484						14	14	14	43.6	43.6	43.6	39.484	0	40.769	230060000	42	0.112427	0.832158	0.296555	0.280799	WP_029060097.1	WP_029060097.1	6959
19.2172	19.0974	19.6839	18.2104	21.8527	21.9574						43	43	43	44.4	44.4	44.4	128.03	0.89071	-2.4461	325980000	49	0.465843	0.405163	-1.34068	-0.996913	WP_029060100.1	WP_029060100.1	6961
23.071	22.2202	22.8783	22.8436	23.2186	23.0535						22	22	22	78.7	78.7	78.7	33.986	0	53.253	952940000	72	0.491871	0.496498	-0.315417	-0.831146	WP_029060105.1	WP_029060105.1	6964
21.7452	21.3766	21.8928	21.5597	21.8719	21.9201						20	20	20	48.9	48.9	48.9	42.46	0	74.957	383630000	71	0.231223	0.762612	-0.112369	-0.386673	WP_029060106.1	WP_029060106.1	6965
21.4964	21.9546	20.3211	21.3435	22.3664	22.0616						13	13	13	53.9	53.9	53.9	26.61	0	38.383	526970000	47	0.509228	0.409011	-0.666491	-0.990017	WP_029060108.1	WP_029060108.1	6967
25.2271	25.4998	25.1029	25.3072	25.2912	25.3278						31	31	31	93.2	93.2	93.2	26.19	0	222.89	4208500000	284	0.0978897	0.908098	-0.0321585	-0.147724	WP_029060109.1	WP_029060109.1	6968
27.9435	27.6967	27.549	27.9071	28.1134	28.2137						27	27	27	87	87	87	36.309	0	323.31	29362000000	875	1.12009	0.249032	-0.348333	-1.41456	WP_029060112.1	WP_029060112.1	6971
20.7067	20.4767	20.3049	20.4719	20.3628	20.8142						4	4	4	52.4	52.4	52.4	14	0	12.595	166230000	22	0.107981	0.884282	-0.0535126	-0.191802	WP_029060116.1	WP_029060116.1	6975
22.5638	22.434	22.9885	21.7375	22.0512	22.0359						24	24	24	49.5	49.5	49.5	60.008	0	69.922	433150000	103	1.67115	0.106093	0.720558	2.43313	WP_029060117.1	WP_029060117.1	6976
21.5848	21.7769	21.8552	21.506	21.8271	21.8796						22	22	22	51.9	51.9	51.9	49.756	0	63.461	369650000	73	0.00327334	0.99678	0.00141907	0.00587029	WP_029060118.1	WP_029060118.1	6977
22.442	22.2044	22.2639	21.969	22.6427	22.5055						22	22	22	70.3	70.3	70.3	34.615	0	96.616	677920000	102	0.115144	0.868596	-0.0689761	-0.217181	WP_029060121.1	WP_029060121.1	6980
19.6886	19.7704	19.8305	20.0877	19.9462	19.756						7	7	7	25.4	25.4	25.4	30.881	0	15.494	71329000	17	0.731003	0.507196	-0.1668	-0.815534	WP_029060122.1	WP_029060122.1	6981
21.2225	21.3416	21.1383	18.3086	21.6653	21.643						12	12	12	66.8	66.8	66.8	26.662	0	53.09	347390000	41	0.246141	0.654918	0.695156	0.571313	WP_029060123.1	WP_029060123.1	6982
22.586	22.5924	22.9005	22.9328	22.9163	22.7438						26	26	26	59.6	59.6	59.6	61.966	0	185.46	936540000	107	0.644363	0.535386	-0.171348	-0.77853	WP_029060124.1	WP_029060124.1	6983
23.7589	22.8581	24.2031	23.859	23.8388	24.0511						32	32	32	78.1	78.1	78.1	47.613	0	180.39	1231200000	80	0.31559	0.625069	-0.309626	-0.617539	WP_029060136.1	WP_029060136.1	6989
19.7521	18.7882	21.8435	22.7402	23.0875	22.7665						22	22	22	54	54	54	38.671	0	37.053	687780000	59	1.40367	0.107083	-2.73681	-2.71331	WP_029060137.1	WP_029060137.1	6990
24.0965	24.0089	23.994	24.3967	24.3404	24.2424						28	28	28	81.2	81.2	81.2	28.952	0	170.64	1890000000	152	2.21806	0.140894	-0.29336	-1.88944	WP_029060140.1	WP_029060140.1	6991
22.3612	18.3782	22.1515	18.7683	22.321	22.117						23	23	23	67.1	67.1	67.1	50.574	0	77.665	512620000	55	0.0202122	0.964605	-0.10512	-0.0573669	WP_029060141.1	WP_029060141.1	6992
20.8166	20.8708	20.9684	20.9418	20.5724	20.7762						13	13	13	53.8	53.8	53.8	29.784	0	21.738	131390000	32	0.453535	0.658838	0.121787	0.56459	WP_029060162.1	WP_029060162.1	7004
22.2646	22.3853	22.4888	22.4714	22.5541	22.4254						27	27	27	50.8	50.8	50.8	57.205	0	84.904	629380000	87	0.624881	0.643046	-0.104082	-0.594958	WP_029060163.1	WP_029060163.1	7005
18.9798	19.9733	20.019	19.7598	19.8437	19.9763						9	9	9	33	33	33	39.392	0.00057078	4.2078	95873000	21	0.230288	0.712936	-0.20258	-0.455402	WP_029060164.1	WP_029060164.1	7006
22.8937	22.2209	23.0431	22.853	23.6506	23.3886						58	58	57	73.9	73.9	73.1	80.17	0	243.72	1218300000	163	0.771891	0.278289	-0.578203	-1.29924	WP_029060166.1	WP_029060166.1	7008
21.3859	22.0692	21.7255	21.7783	21.1618	21.4258						17	17	17	82.7	82.7	82.7	20.718	0	35.425	297440000	43	0.437602	0.550793	0.271598	0.74191	WP_029060168.1	WP_029060168.1	7009
19.4821	20.0034	18.9976	19.0381	19.8943	19.8457						14	14	14	39.9	39.9	39.9	35.801	0	12.723	86522000	24	0.0868815	0.881706	-0.0983435	-0.195981	WP_029060169.1	WP_029060169.1	7010
18.3121	19.4112	19.5971	19.6017	16.3834	16.7029						5	5	5	37.9	37.9	37.9	23.243	0	6.4399	31289000	19	0.632889	0.283783	1.54408	1.28737	WP_029060171.1	WP_029060171.1	7011
20.1025	19.6226	18.8511	19.1808	19.3992	19.6809						7	7	7	28.1	28.1	28.1	30.332	0	24.447	74326000	11	0.095838	0.870155	0.105096	0.213522	WP_029060174.1	WP_029060174.1	7014
23.1368	22.6599	23.5551	19.6674	21.7032	21.9016						33	33	33	66.9	66.9	66.9	60.545	0	89.191	377070000	92	1.25274	0.110719	2.02651	2.35817	WP_029060175.1	WP_029060175.1	7015
22.782	22.2527	21.9492	22.5913	22.6835	22.631						12	12	12	70.5	70.5	70.5	20.368	0	53.501	714640000	51	0.556428	0.461401	-0.307297	-0.891241	WP_029060176.1	WP_029060176.1	7016
23.814	23.585	24.1169	24.3372	24.3735	24.0765						38	38	38	56.4	56.4	56.4	82.683	0	120.42	1436400000	132	1.10577	0.223388	-0.423772	-1.51233	WP_029060177.1	WP_029060177.1	7017
21.6658	21.1964	21.1957	21.159	21.7924	21.6722						23	23	23	73	73	73	20.689	0	63.199	379620000	63	0.30819	0.670033	-0.188562	-0.539551	WP_029060179.1	WP_029060179.1	7019
21.341	19.8178	21.9696	20.128	21.5433	21.7496						11	11	11	40.8	40.8	40.8	34.449	0	30.465	269330000	28	0.0405948	0.926838	-0.0975196	-0.106325	WP_029060180.1	WP_029060180.1	7020
24.3774	23.5873	23.5032	22.1971	23.5762	24.2372						17	17	17	68.9	68.9	68.9	19.689	0	190.65	1296900000	59	0.297588	0.612914	0.485765	0.6372	WP_029060186.1	WP_029060186.1	7023
18.8779	19.448	18.8896	19.3367	21.456	21.5836						2	2	2	10.3	10.3	10.3	27.366	0	27.232	271800000	10	1.07454	0.120827	-1.72026	-2.01785	WP_029060188.1	WP_029060188.1	7025
19.0077	19.4918	19.3379	21.3627	21.9204	22.2814				+	2AEP P_Pi	49	49	49	51.3	51.3	51.3	125.58	0	101.91	303150000	60	2.97871	0.0351304	-2.57572	-6.39135	WP_029060190.1	WP_029060190.1	7027
21.7891	21.9763	18.695	21.5671	21.7227	22.1809						11	11	11	53.1	53.1	53.1	23.291	0	37.957	411220000	40	0.392177	0.485537	-1.00341	-0.850517	WP_029060191.1	WP_029060191.1	7028
22.2957	22.5818	22.7666	22.9098	22.9632	22.8074						39	39	39	74	74	74	57.37	0	132.16	820930000	110	1.12483	0.247922	-0.345436	-1.41327	WP_029060199.1	WP_029060199.1	7032
21.4362	18.8247	21.69	22.7343	21.3571	21.3759						19	19	19	32.1	32.1	32.1	48.249	0	39.629	240060000	66	0.500629	0.385099	-1.17214	-1.04376	WP_029060200.1	WP_029060200.1	7033
22.3132	19.1638	21.4978	20.6683	21.7481	21.4975						29	29	29	81.8	81.8	81.8	40.32	0	62.552	368040000	64	0.113755	0.830454	-0.313044	-0.284967	WP_029060203.1	WP_029060203.1	7035
21.3853	19.798	18.6702	19.8575	22.0104	21.9933						17	17	17	56.9	56.9	56.9	46.495	0	90.599	397590000	39	0.556829	0.337356	-1.3359	-1.14814	WP_029060208.1	WP_029060208.1	7038
23.378	23.1544	23.3621	23.5892	23.5565	23.6832						26	26	26	67.8	67.8	67.8	50.27	0	105.81	1276800000	105	1.72818	0.176301	-0.311497	-1.71682	WP_029060209.1	WP_029060209.1	7039
23.8831	23.8861	23.6375	23.9378	24.3556	24.1727						11	11	11	96.9	96.9	96.9	16.759	0	248.81	1804700000	142	1.13504	0.24526	-0.353123	-1.43365	WP_029060211.1	WP_029060211.1	7040
18.8193	20.0949	19.5679	19.0551	14.8324	15.9184						4	4	4	32.3	32.3	32.3	23.493	0.00056085	3.6085	3434100	12	1.02956	0.12028	2.89203	2.03809	WP_029060215.1	WP_029060215.1	7043
23.0855	22.3145	23.2998	22.5262	24.3509	23.5693						3	3	3	16.7	16.7	16.7	58.309	0	50.849	1235400000	32	0.406678	0.501139	-0.582226	-0.823104	WP_029060217.1	WP_029060217.1	7044
21.8094	21.652	21.7533	22.1322	22.4295	22.2585						27	27	27	72.2	72.2	72.2	49.546	0	203.77	418750000	76	2.26749	0.107096	-0.535171	-2.70735	WP_029060220.1	WP_029060220.1	7045
20.0019	20.2025	19.5405	19.5691	19.9296	19.7499						19	19	19	64.4	64.4	64.4	33.762	0.00058685	4.7653	87368000	22	0.303367	0.681804	0.165445	0.513992	WP_029060222.1	WP_029060222.1	7046
19.8205	19.7314	20.124	19.8289	20.4975	20.413						18	18	18	44	44	44	43.839	0	12.927	93806000	38	0.6656	0.386569	-0.354499	-1.0382	WP_029060223.1	WP_029060223.1	7047
21.3092	21.6501	21.4841	21.8926	21.3194	21.2198						21	21	21	53.7	53.7	53.7	46.379	0	59.121	217870000	47	0.00545511	0.994827	0.00385475	0.0116247	WP_029060225.1	WP_029060225.1	7049
20.5031	19.0081	20.6922	20.2772	18.026	19.3094						5	5	5	62	62	62	15.793	0	11.039	93145000	15	0.440111	0.443512	0.863593	0.916854	WP_029060230.1	WP_029060230.1	7052
19.8498	20.6323	18.4406	20.3926	19.2052	18.8594						5	5	5	45.1	45.1	45.1	19.727	0.00057339	4.3059	39187000	10	0.0684631	0.893926	0.15518	0.17403	WP_029060235.1	WP_029060235.1	7057
21.4927	20.9015	21.4112	20.7721	21.4946	21.7626						14	14	14	72.1	72.1	72.1	30.476	0	59.945	381970000	52	0.0751608	0.898052	-0.074625	-0.16625	WP_029060238.1	WP_029060238.1	7059
23.3764	23.0147	22.5585	21.0821	21.9139	22.2941						12	12	12	87.4	87.4	87.4	14.257	0	43.369	430310000	50	1.33054	0.110862	1.21981	2.30578	WP_029060240.1	WP_029060240.1	7061
21.24	19.6984	19.5305	19.922	21.1085	21.0047						28	28	28	62.1	62.1	62.1	60.475	0	35.174	168740000	39	0.323115	0.583067	-0.522061	-0.684023	WP_029060250.1	WP_029060250.1	7067
25.5424	25.1411	24.8332	24.1776	25.0474	24.9952						18	18	18	95.8	95.8	95.8	10.315	0	142.7	3146100000	177	0.548603	0.422374	0.432178	0.963543	WP_029060251.1	WP_029060251.1	7068
30.2459	30.2607	30.1816	29.6633	29.9477	29.8385						91	91	91	91	91	91	57.645	0	323.31	94623000000	1959	2.05789	0.114774	0.412934	2.21624	WP_029060252.1	WP_029060252.1	7069
19.2924	19.5106	17.7375	19.8443	20.6481	20.0584						15	15	15	46	46	46	38.898	0.34534	-0.093996	149560000	15	1.03285	0.141196	-1.33676	-1.88866	WP_037544967.1	WP_037544967.1	7082
21.3342	20.1615	21.3528	21.395	20.3816	21.1941						34	34	34	57.2	57.2	57.2	80.396	0	30.611	223220000	68	0.027284	0.955347	-0.0407499	-0.0677775	WP_037544970.1	WP_037544970.1	7083
20.213	19.4901	20.1167	18.2919	20.2788	19.5615						11	11	11	41.1	41.1	41.1	38.241	0	15.61	105590000	20	0.378812	0.535464	0.562494	0.777424	WP_037544972.1	WP_037544972.1	7084
26.2322	26.2494	25.6933	25.3416	25.4994	25.8668						16	16	16	79.1	79.1	79.1	17.573	0	143.71	4137800000	94	0.954256	0.24514	0.489017	1.43885	WP_037544979.1	WP_037544979.1	7086
21.5374	19.286	21.824	19.1315	18.1925	20.9052						3	3	3	20	20	20	32.543	0.20798	0.25069	206110000	24	0.581062	0.31924	1.47271	1.19746	WP_037545007.1	WP_037545007.1	7091
26.5904	25.9228	26.0378	19.4023	27.2232	18.8401						10	10	10	21.6	21.6	21.6	53.548	0.0015957	2.5944	17505000000	37	0.737037	0.211896	4.36182	1.5504	WP_037545013.1	WP_037545013.1	7092
[truncated: 334 more rows]
