# Supplementary material for: Aminophosphonate mineralisation is a major step in the global oceanic phosphorus redox cycle
Source: Research Square preprint supplement (doi:10.21203/rs.3.rs-114998/v1), 2020-12-18
Supplement: Supplementary file 5 [file 2715f29c2bdc41ebdc1fec4d.docx]

glpT MLSIFKPAPHKARLPAAEIDPTYRRLRWQIFLGIFFG**Y**AAY**Y**LV**RK**NFALAMPYLVEQ-G

AepP ---------MNQSLAA------FKRWRIQIFAITWLA**Y**AAF**Y**FT**RK**AFSVAKLGIAEDPG

: *.* :.* * *** ::.***:*:.** *::* :.*: *

glpT FSRGDLGFA-LSGISI-A**Y**GFS**K**FIMGSVSDRSNPRVFLPAGLILAAAVMLFMGFVPWAT

AepP FMLDKAAMANLDAIYLAA**Y**AVG**Q**FTWGMLADRFGPRVVVLGGLLISAAAAVVMG----SY

* .. .:* *..* : **...:* * ::** .***.: .**:::**. :.** :

glpT SSIAVMFVLLFLCGWFQGMGWPPCGRTMVHWWSQKERGGIVSVW**N**CA**H**NVGGGI-PPLLF

AepP ATFPIFATCMLVQGLAQSTGWAGLCKNIGSFFPASQRGRVLGLW**S**SC**Y**AFGGLVASPFAG

:::.:: . ::: * *. **. ..: ::. .:** ::.:*...: .** : .*:

glpT LLGMAWFNDWHAALYMPAFCAILVALFAFAMMRDTPQSCGLPPIEEYKNDYPDDYNEKAE

AepP WWAYTLVGNWHAAFFSSAAVVALVAVLFFFLQRNKPEDVGLPAVE------PEPQSMAPA

. : ..:****:: .* . ***:: * : *:.*:. ***.:* *: . .

glpT QELTAKQIFMQYVLPNKLLWYIAIANVFV**Y**LL**RY**GIL**D**WSPTY-LKEVKHFALDKSSWAY

AepP GSLCSVWAPLREILRNRTVLTLGLAYFLL**K**PA**RY**AIL**L**WGPVIVFEQMPSVGKVGAAIIP

.* : . :. :* *. : :.:* .:: **.** *.*. :::: .. ::

glpT FLY**E**YAGIPGTLLCGWMSDKVFRGNRGATGVFFMTLVTIATIVYWMNP--AGNPTVDMIC

AepP TAF**E**LAGLLGPIMIGLASDKLFGARRMPACVISLVLLTV-TLALFMAAMHTGSVLLVVVL

:* **: *.:: * ***:* ..* .: *: :.*:*: *:. :* . :*. : ::

glpT MIVIGFLIYGP-VMLIGLHALELAPKKAAGTAAGFTGLFG**Y**LGGSVAASAIVGYTVDFFG

AepP LFVMGLTLYGPDSMISGAAAIDFGTAKAGATAAGFVNGCG**S**VGAVLG-----GLLPGYFD

::*:*: :*** *: * *:::.. **..*****.. * :*. :. * .:*.

glpT WDGGFMVMIGGSILAVILLIVVMIGEKRRHEQLLQERNGG---------

AepP GVTVFIVFAGCALFSALVLLPHWNSRPASSAQGTDVAPNTSMAIKPLRT

*:*: * ::::.::*: . * : .

**Figure S4.** ClustalOmega alignment of GlpT, the glycerol-3-phosphate/phosphate (G3P/Pi) antiporter, and AepP protein sequences. Residues that have been shown to bind with the phosphate moiety of G3P, and/or Pi are shown in red if identical, in orange if related, and in blue if unrelated. Residues involved in binding the glycerol moiety of G3P are shown in green.
